# Supplementary material for: Half-Sandwich Type Platinum-Group Metal Complexes of C-Glucosaminyl Azines: Synthesis and Antineoplastic and Antimicrobial Activities
Source: MDPI journal article supplement (doi:10.3390/molecules28073058), 2023-03-29
Supplement: s1 [file s1]

# SUPPORTING INFORMATION

## **Half-sandwich type platinum-group metal complexes of *C*-glucosaminyl azines: synthesis and antineoplastic and antimicrobial activities**

István Kacsir<sup>1,2</sup>, Adrienn Sipos<sup>3,4,5</sup>, Evelin Major<sup>6</sup>, Nikolett Bajusz<sup>6</sup>, Attila Bényei<sup>7</sup>, Péter Buglyó<sup>8</sup>, László Somsák<sup>1</sup>, Gábor Kardos<sup>6</sup>, Péter Bai<sup>3,4,5,9,10,\*</sup>, Éva Bokor<sup>1,\*</sup>

<sup>1</sup>Department of Organic Chemistry, University of Debrecen, P.O. Box 400, H-4002 Debrecen, Hungary;

<sup>2</sup>Doctoral School of Chemistry, University of Debrecen, P.O. Box 400, H-4002 Debrecen, Hungary;

<sup>3</sup>Department of Medical Chemistry, Faculty of Medicine, University of Debrecen, Egyetem Tér 1., H-4032 Debrecen, Hungary;

<sup>4</sup>The Hungarian Academy of Sciences, Center of Excellence, Hungary

<sup>5</sup>MTA-DE Cell Biology and Signaling Research Group ELKH, Debrecen, Hungary

<sup>6</sup>Department of Metagenomics, University of Debrecen, H-4032 Debrecen, Hungary;

<sup>7</sup>Department of Physical Chemistry, Faculty of Sciences and Technology, University of Debrecen, Egyetem Tér 1., H-4032 Debrecen, Hungary;

<sup>8</sup>Department of Inorganic & Analytical Chemistry, Faculty of Sciences and Technology, University of Debrecen, Egyetem Tér 1., H-4032 Debrecen, Hungary;

<sup>9</sup>NKFIH-DE Lendület Laboratory of Cellular Metabolism, H-4032 Debrecen, Hungary

<sup>10</sup>Research Center for Molecular Medicine, Faculty of Medicine, University of Debrecen, H-4032 Debrecen, Hungary

## Table of contents:

|                                                                                                                                                  |           |
|--------------------------------------------------------------------------------------------------------------------------------------------------|-----------|
| <b>1. Copies of <math>^1\text{H}</math> and <math>^{13}\text{C}</math> NMR spectra .....</b>                                                     | <b>3</b>  |
| <b>2. Table S1. Changes of the chemical shifts of selected <math>^1\text{H}</math> NMR resonances as a result of the complex formation .....</b> | <b>62</b> |
| <b>3. Table S2. Distribution coefficient of the synthesized complexes (logD)* .....</b>                                                          | <b>63</b> |
| <b>4. X-Ray diffraction study of Ru-3a .....</b>                                                                                                 | <b>65</b> |
| General information.....                                                                                                                         | 65        |
| <b>Figure S1.</b> Ball and stick model of <b>Ru-3a</b> with partial numbering scheme.....                                                        | 65        |
| <b>Table S3.</b> Experimental details .....                                                                                                      | 66        |
| <b>Figure S2.</b> Packing diagram of <b>Ru-3a</b> .....                                                                                          | 67        |
| <b>Table S4.</b> Hydrogen-bond geometry ( $\text{\AA}$ , $^\circ$ ) for <b>Ru-3a</b> .....                                                       | 67        |
| <b>Table S5.</b> Geometric parameters ( $\text{\AA}$ , $^\circ$ ) for <b>Ru-3a</b> .....                                                         | 68        |
| <b>5. References .....</b>                                                                                                                       | <b>74</b> |

# 1. Copies of $^1\text{H}$ and $^{13}\text{C}$ NMR spectra

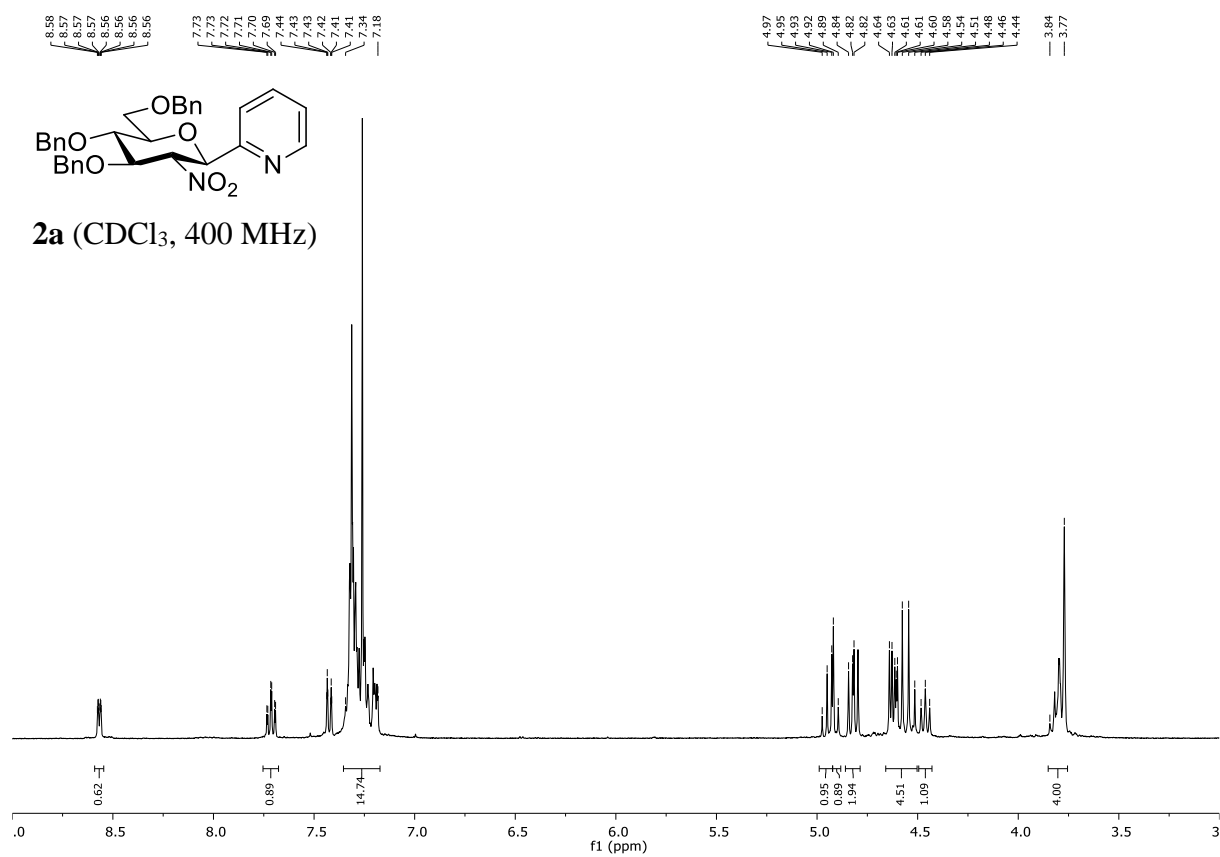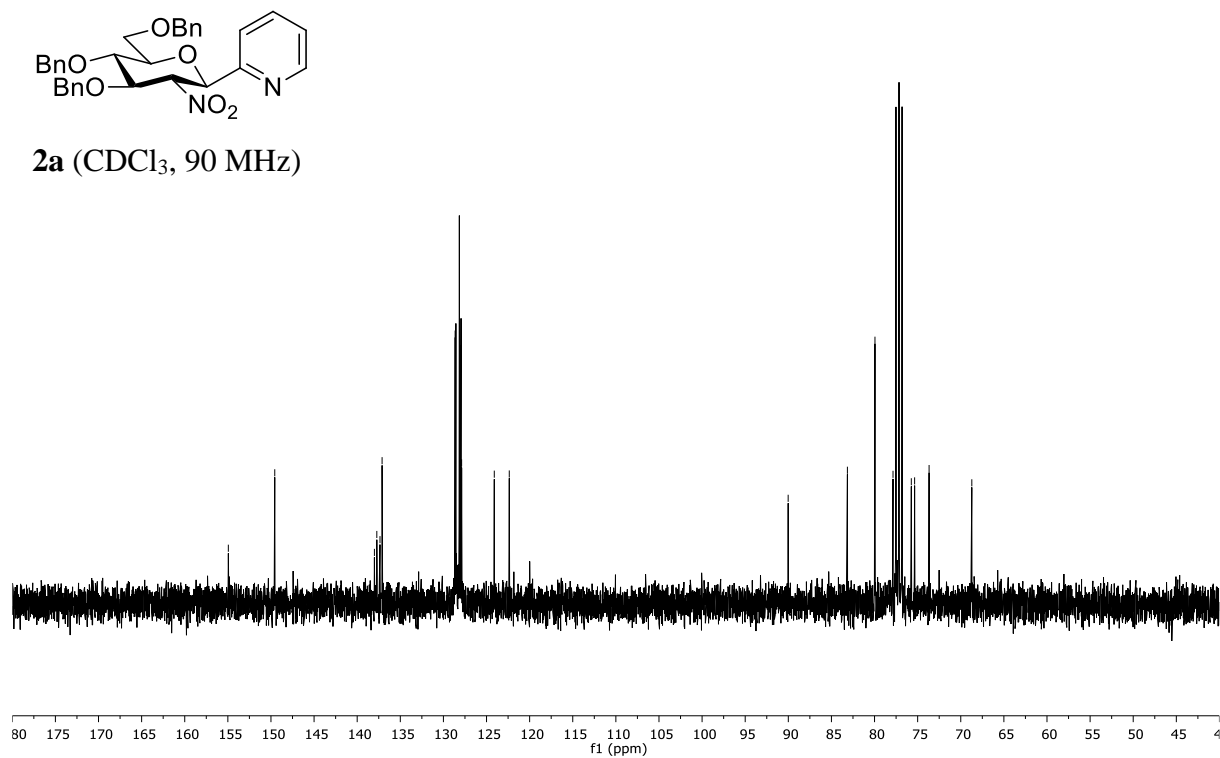

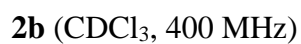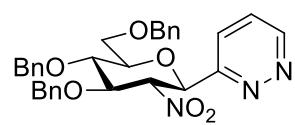

**2b** (CDCl<sub>3</sub>, 100 MHz)

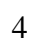

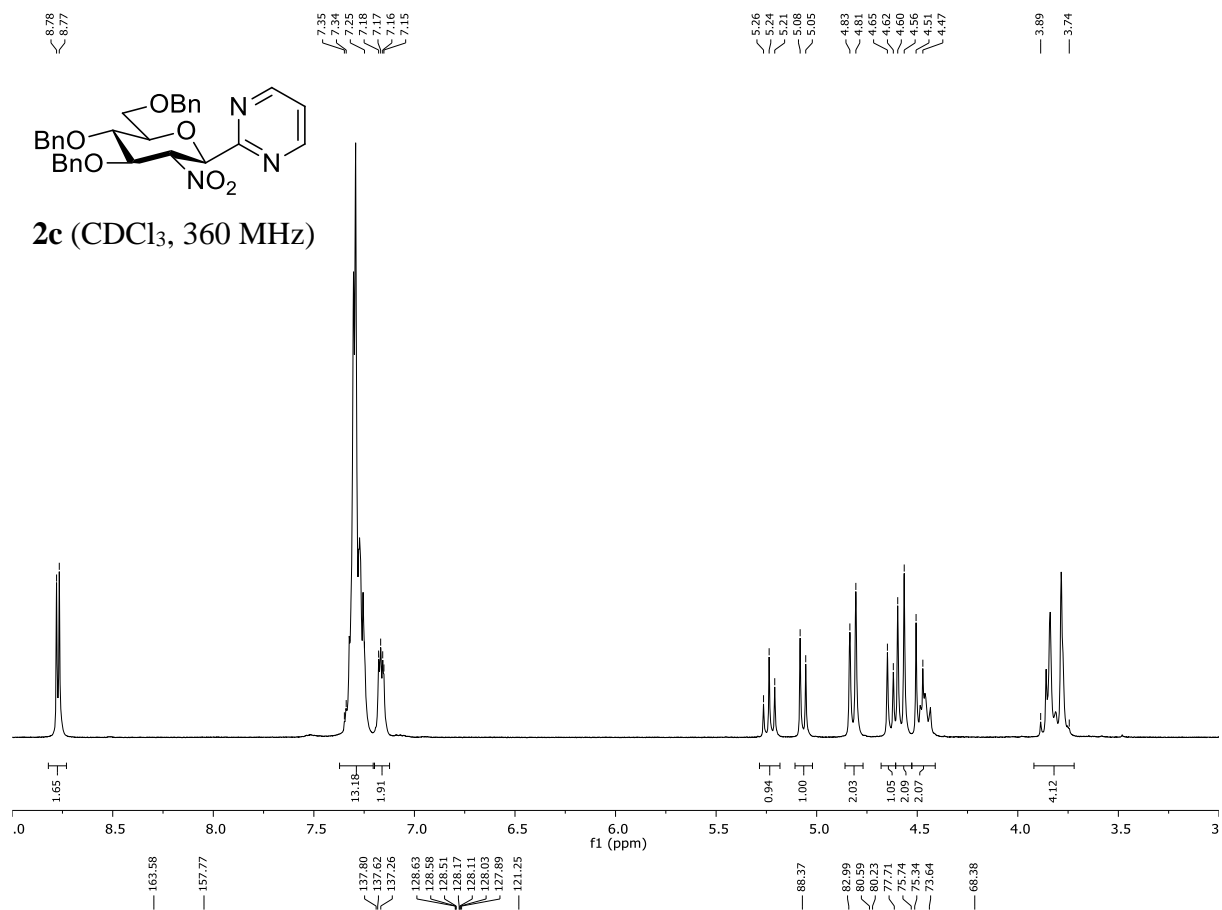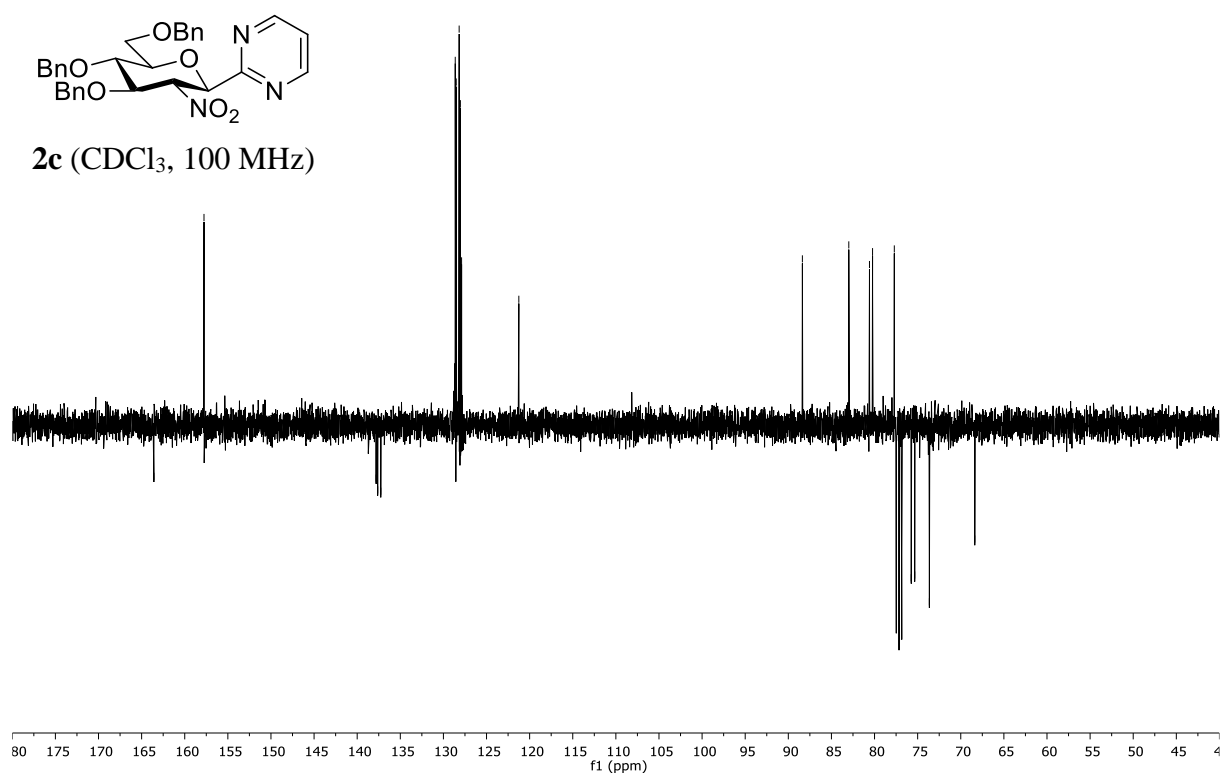

**2d** (CDCl<sub>3</sub>, 400 MHz)

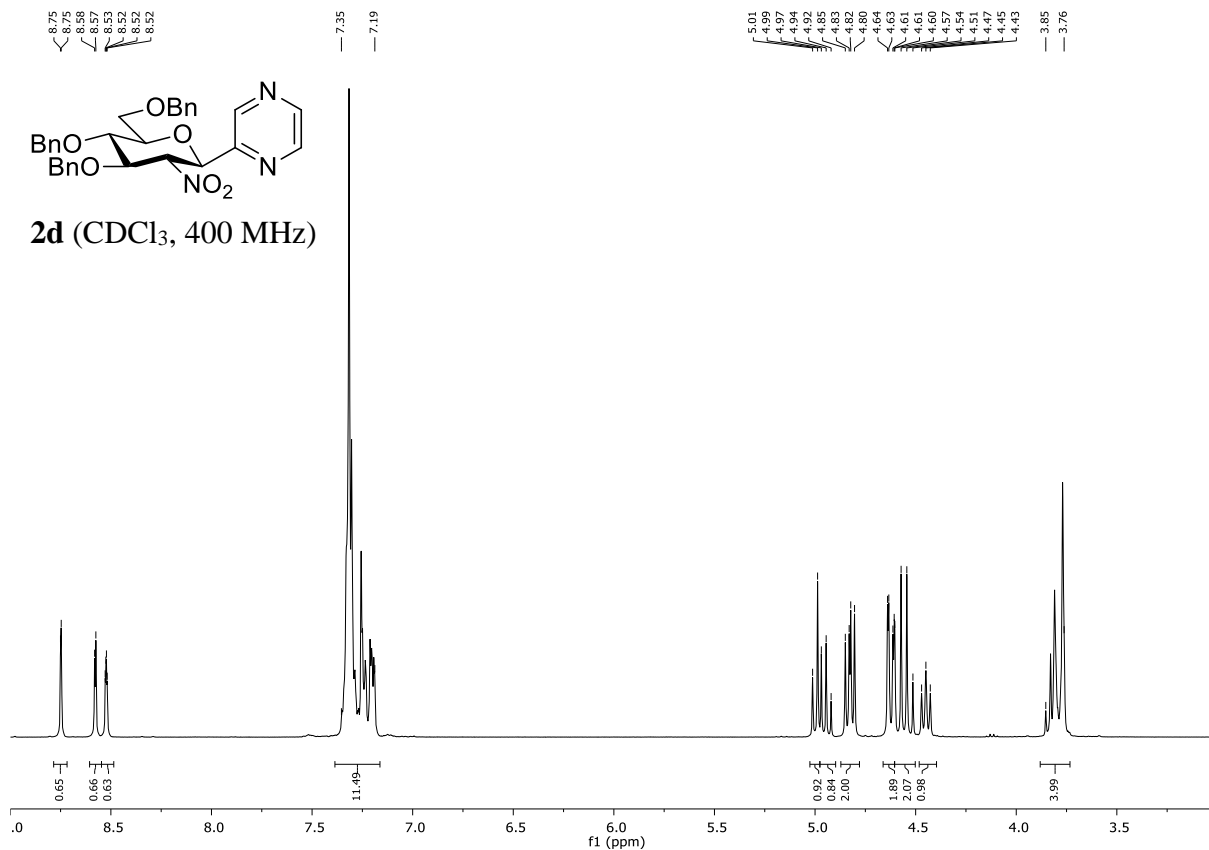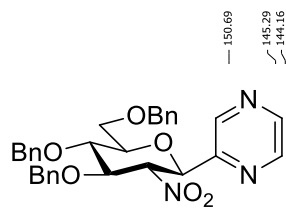

**2d** (CDCl<sub>3</sub>, 100 MHz)

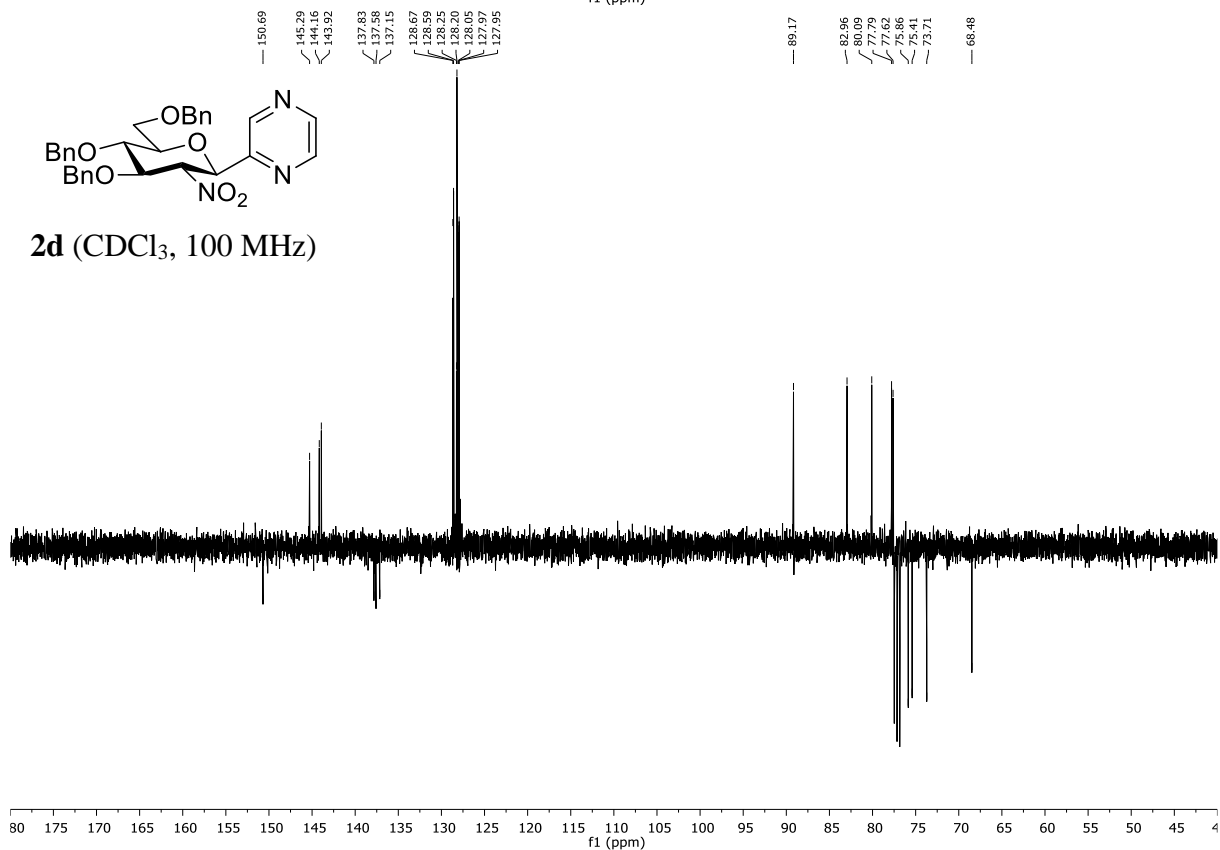

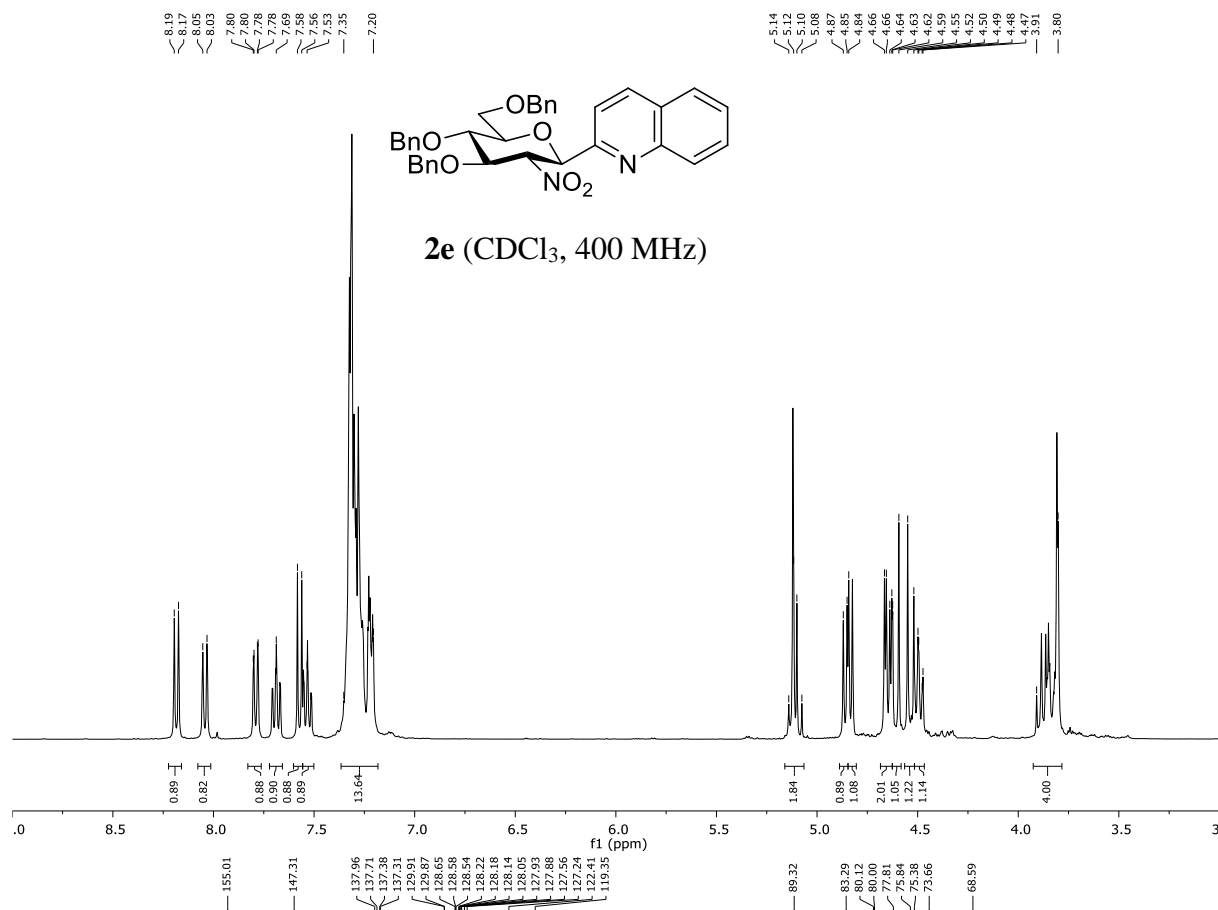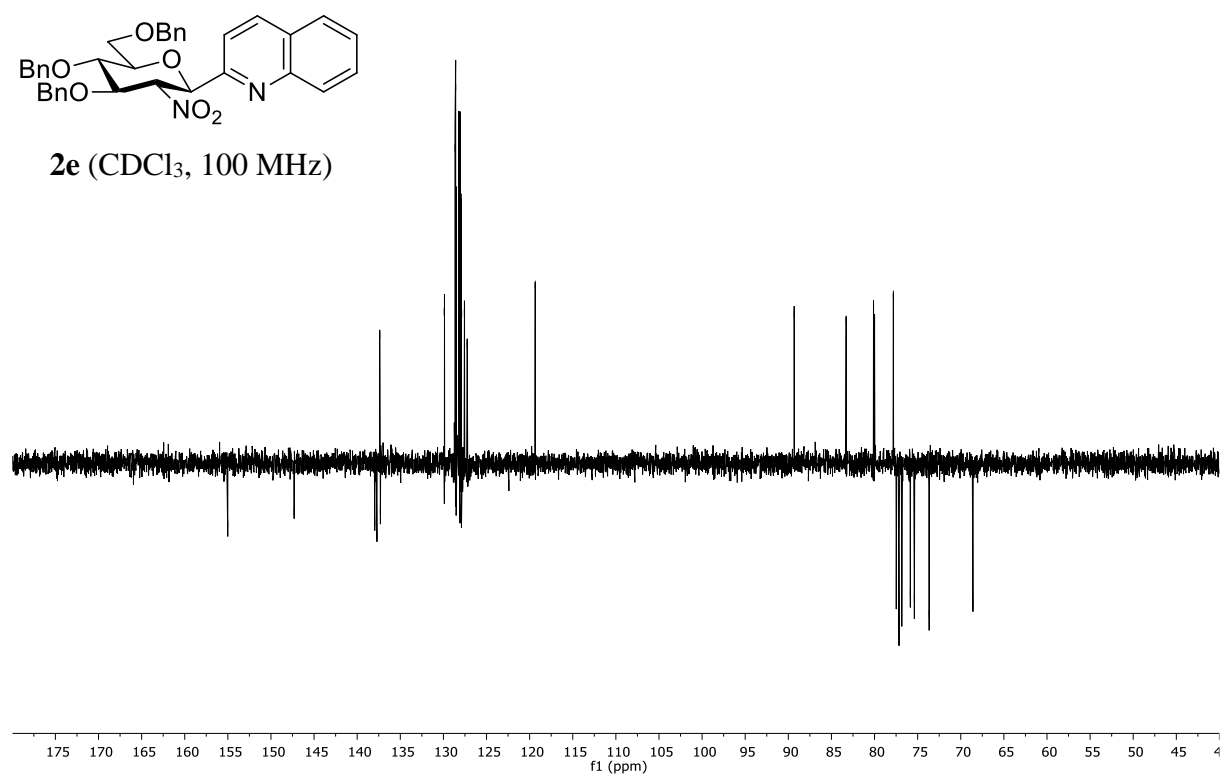

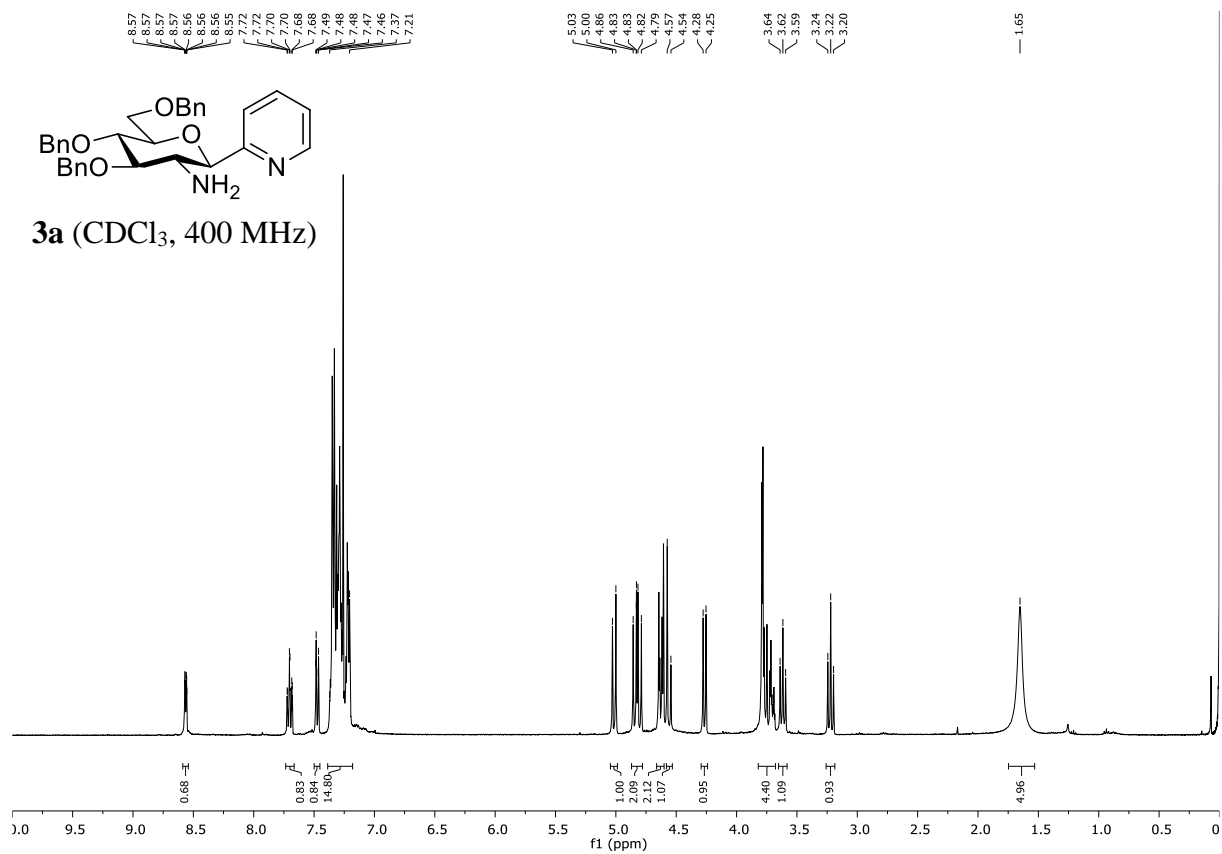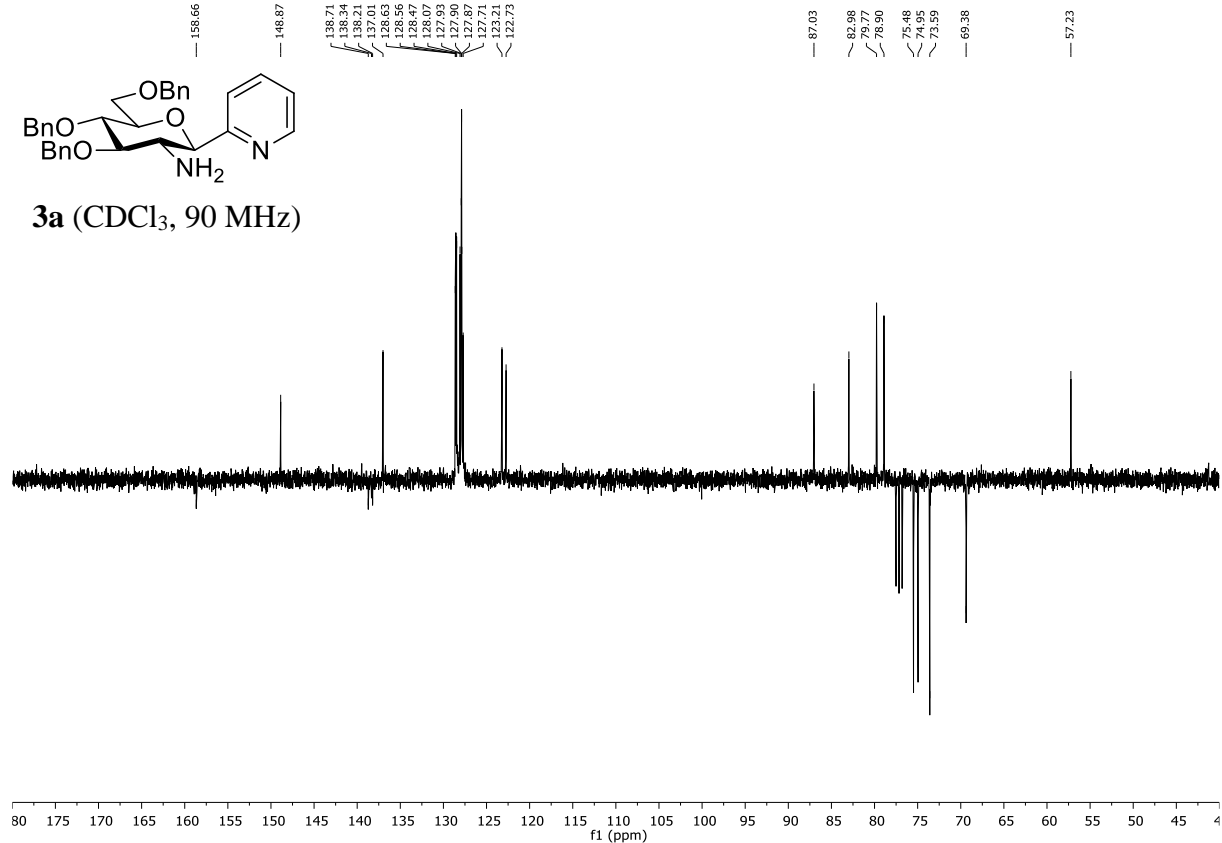

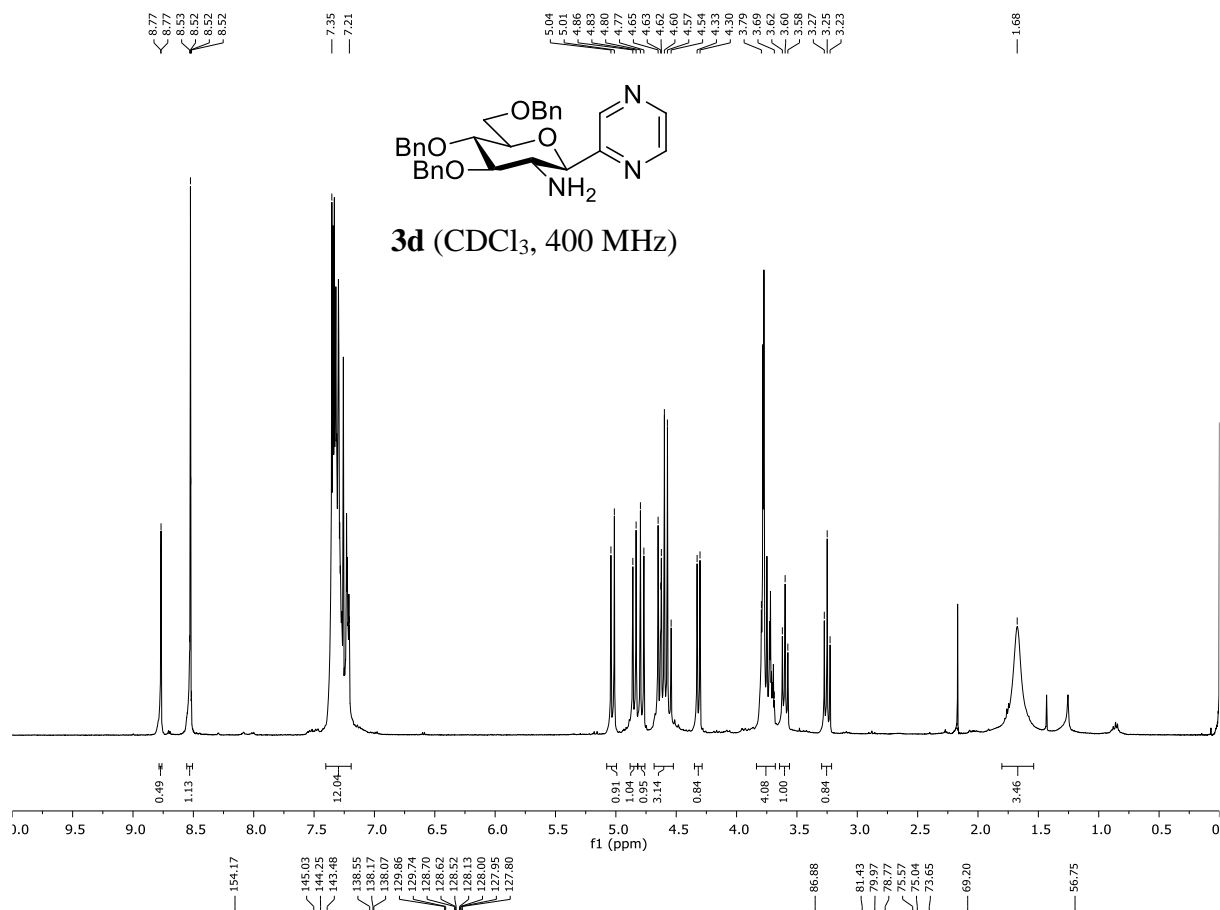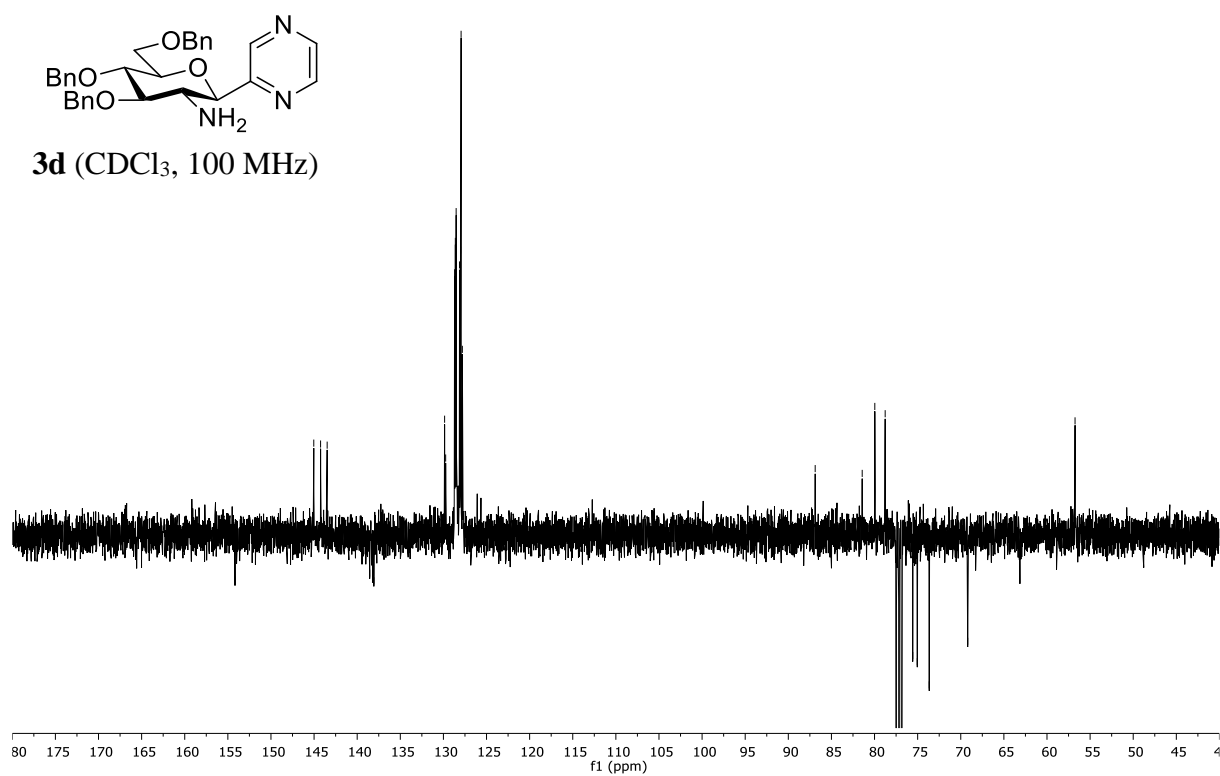

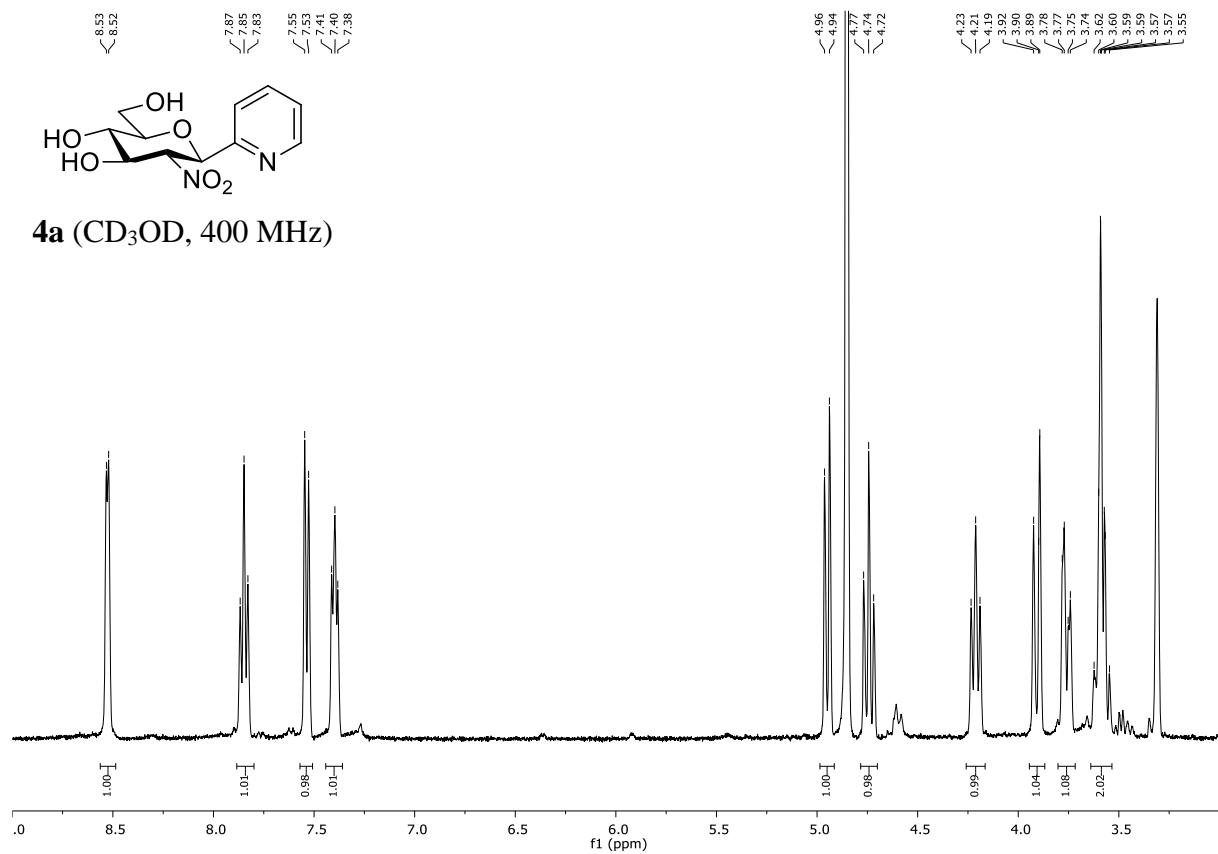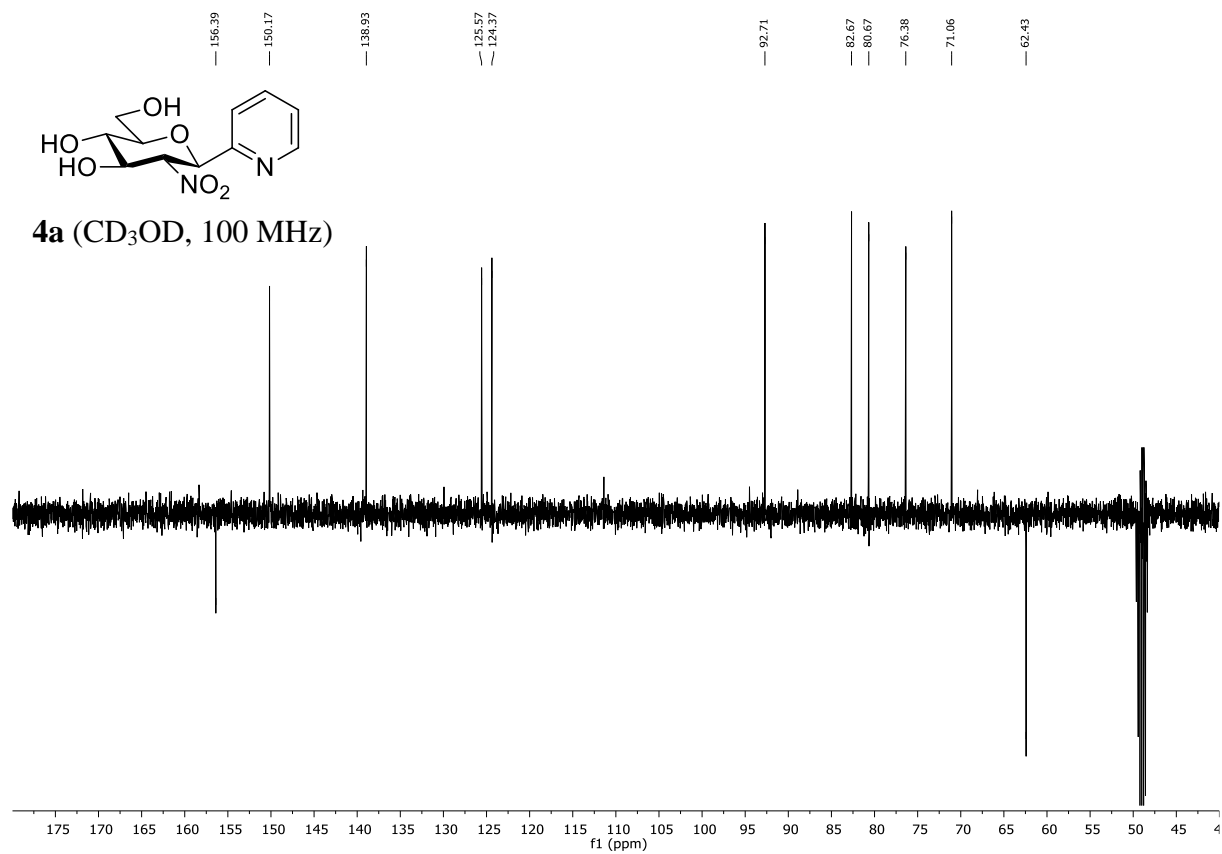

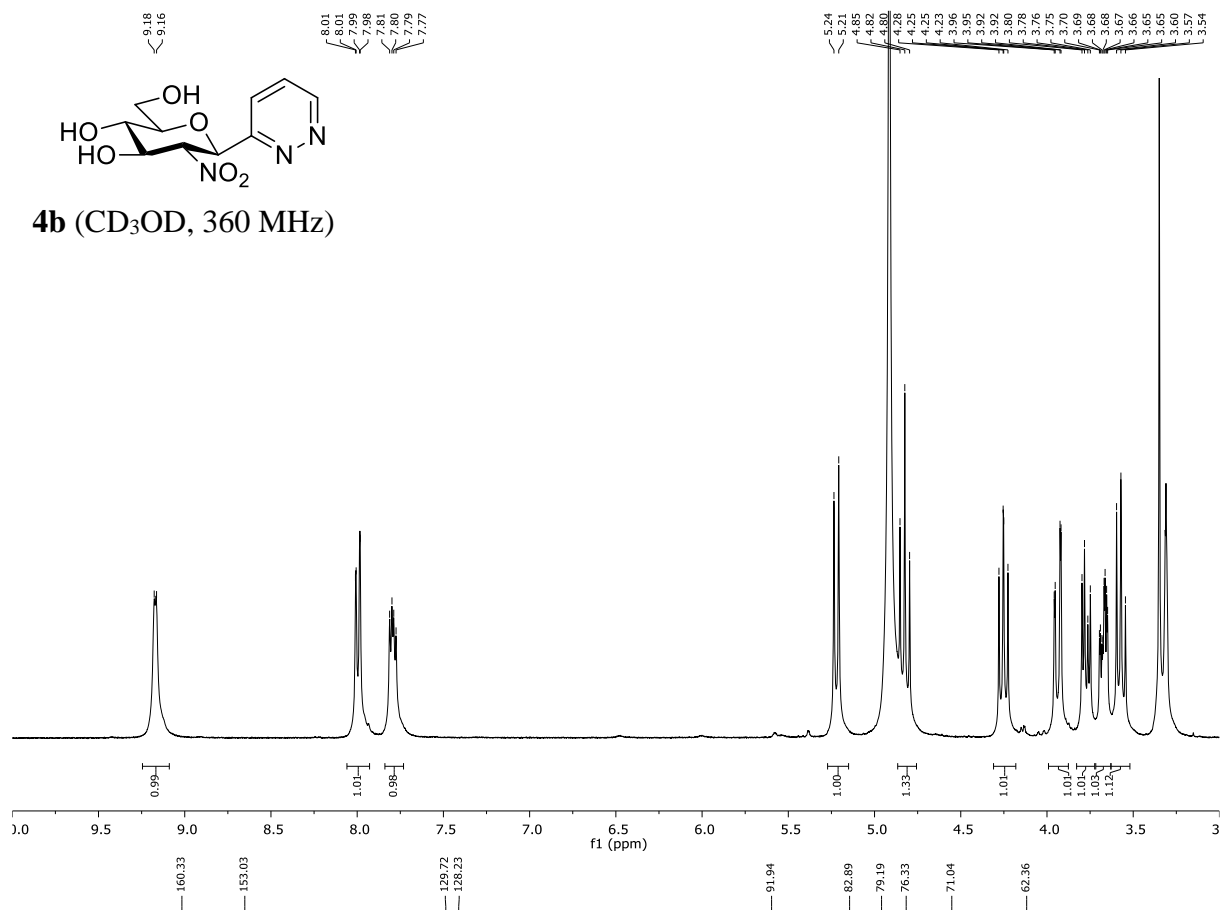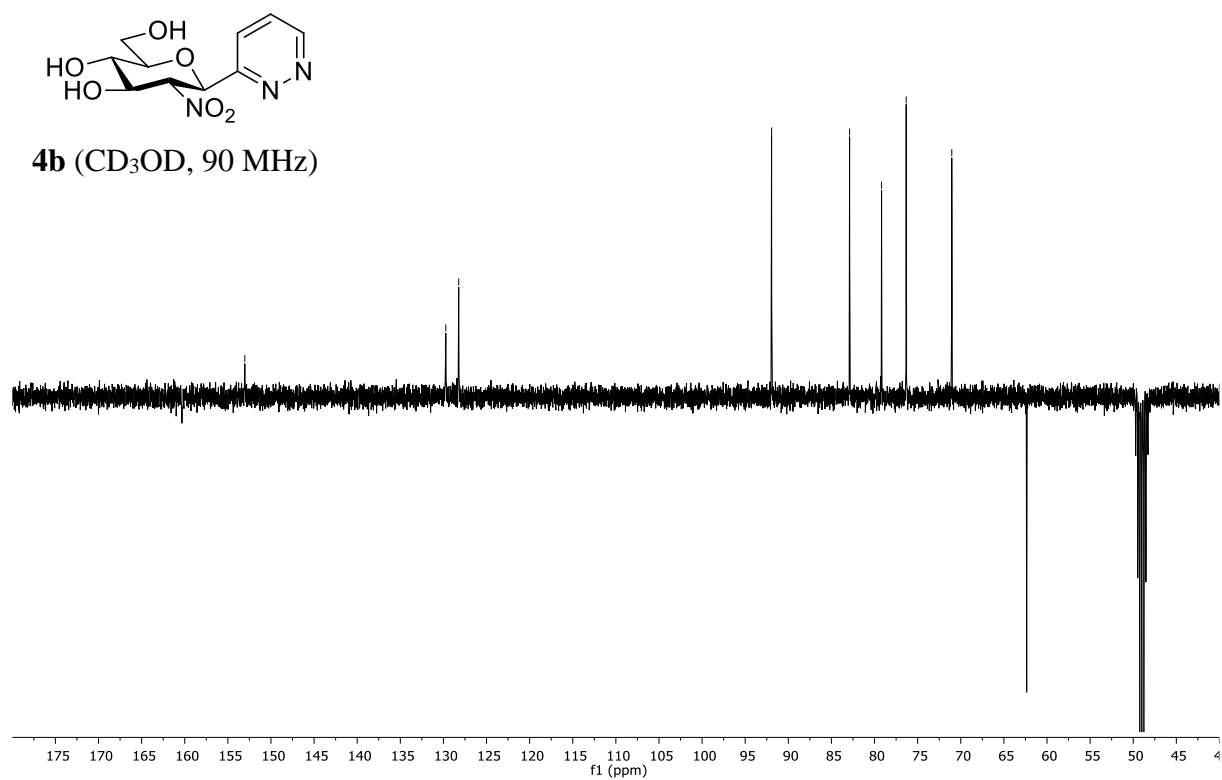

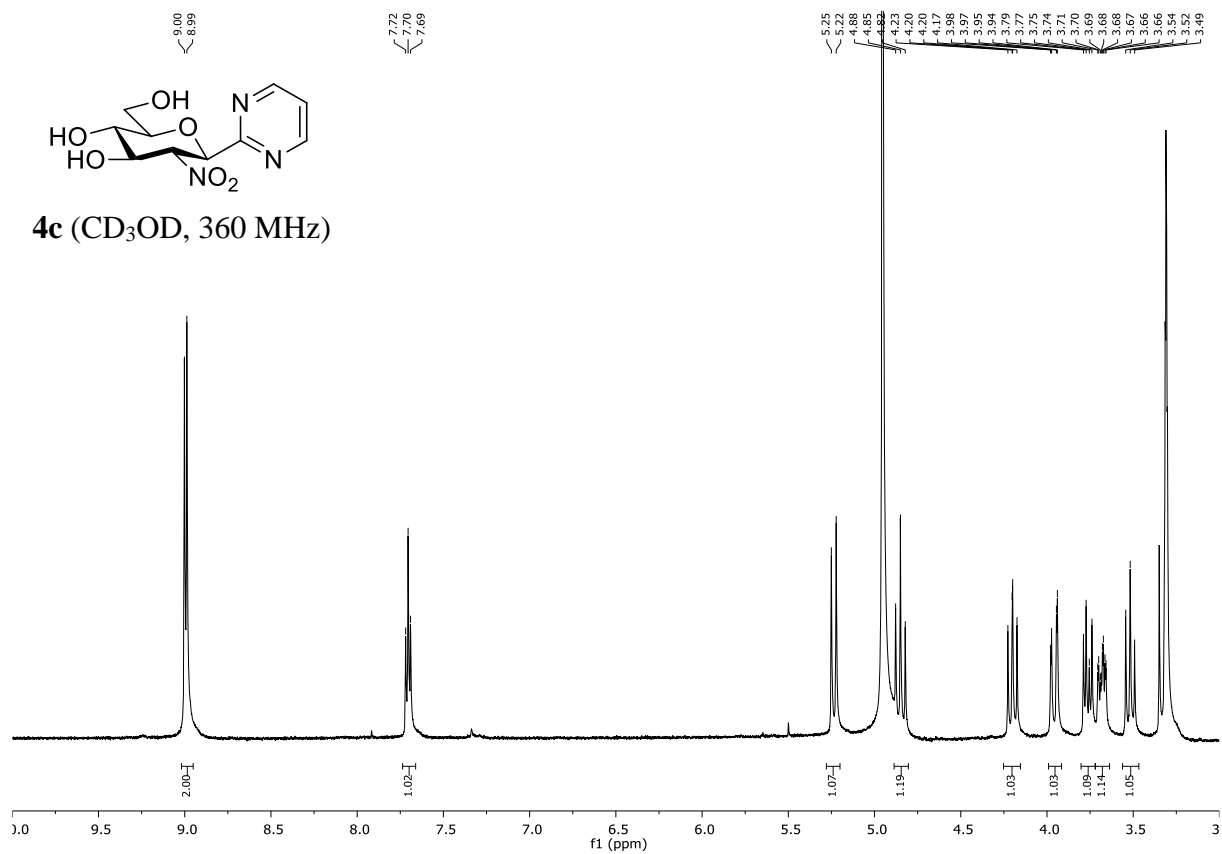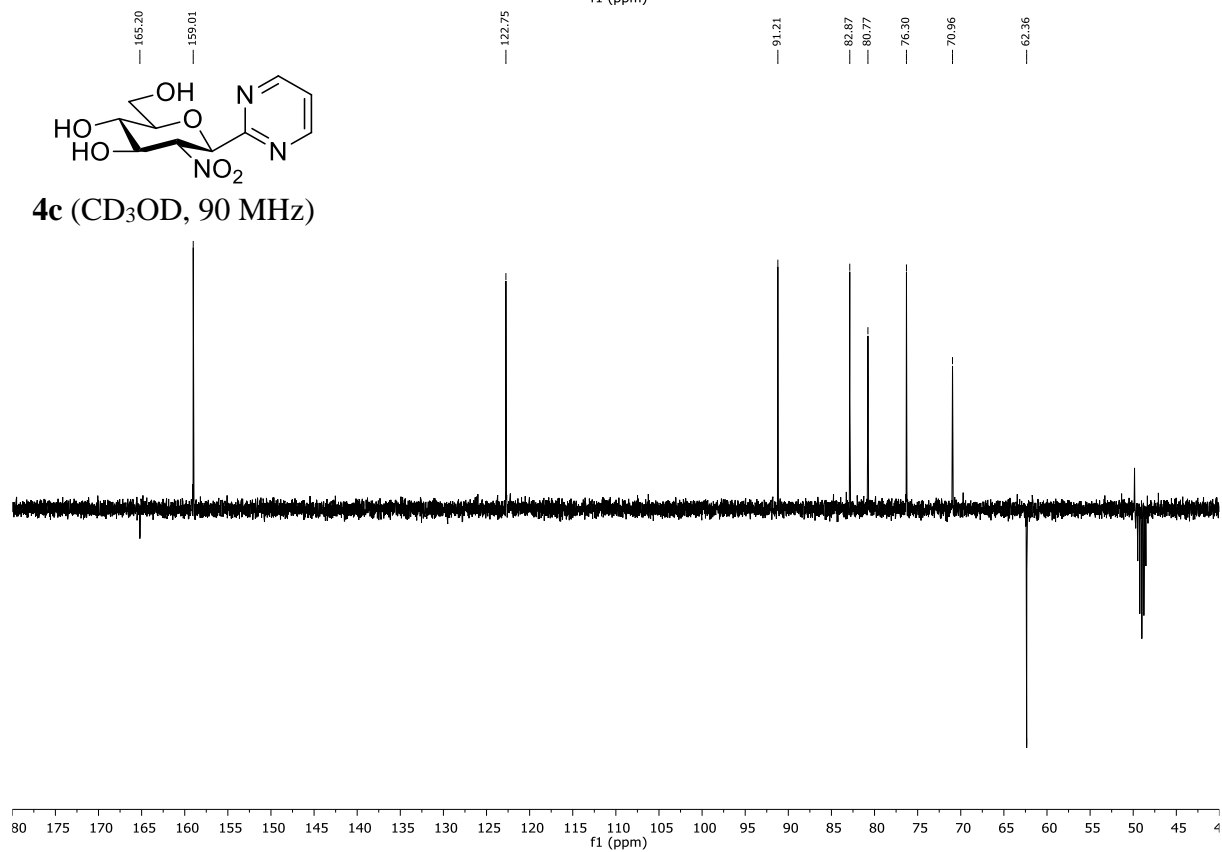

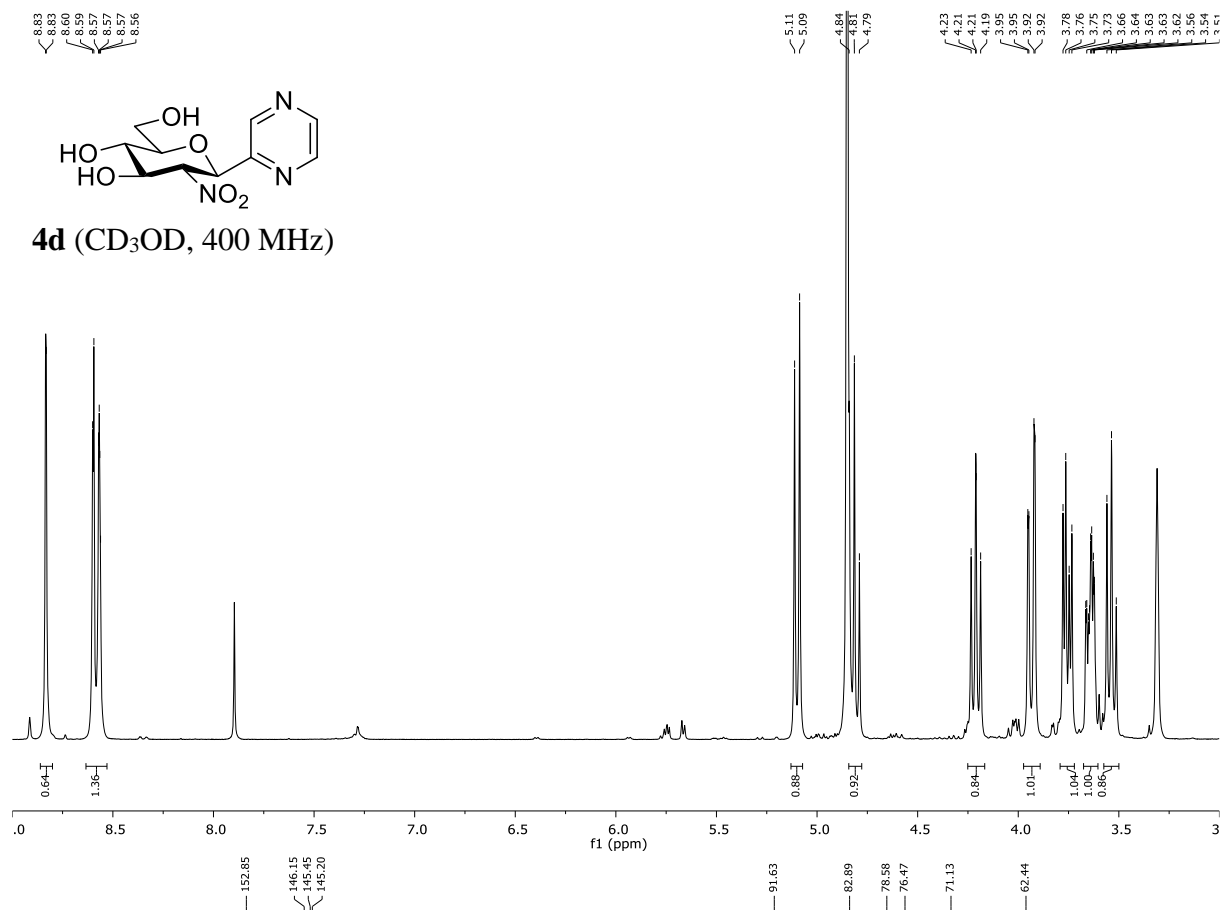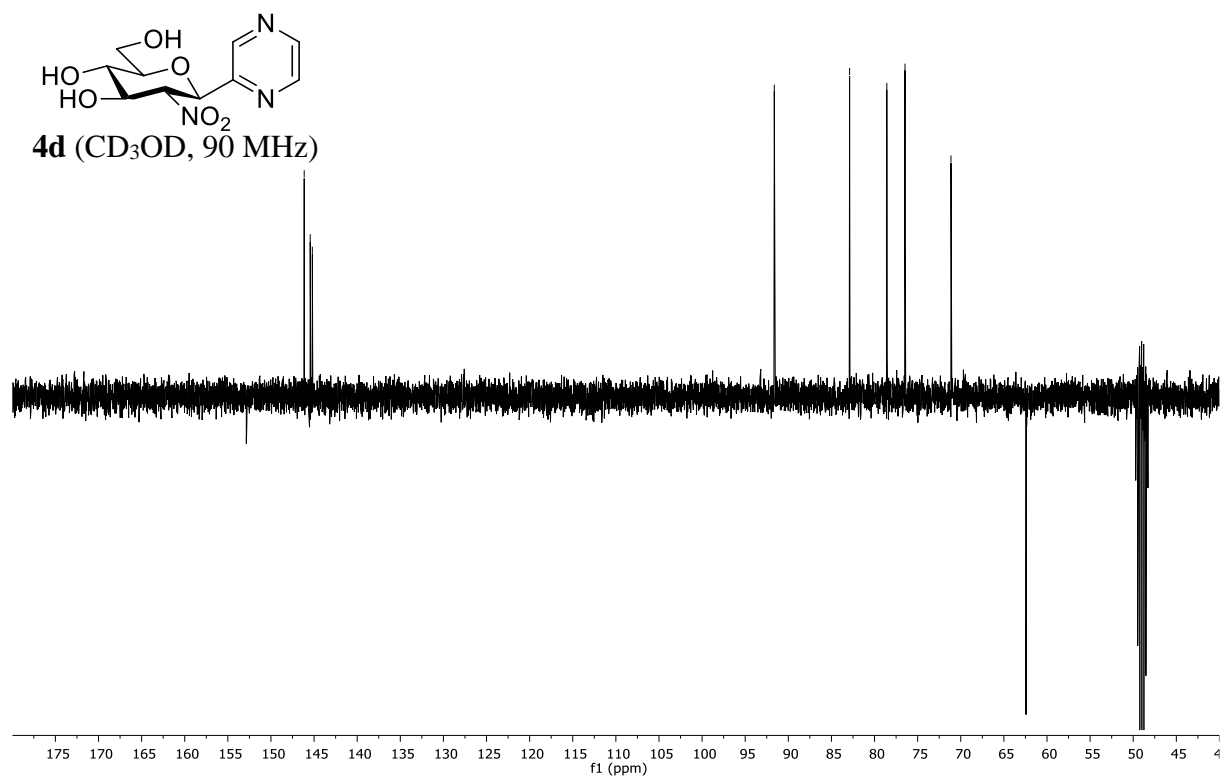

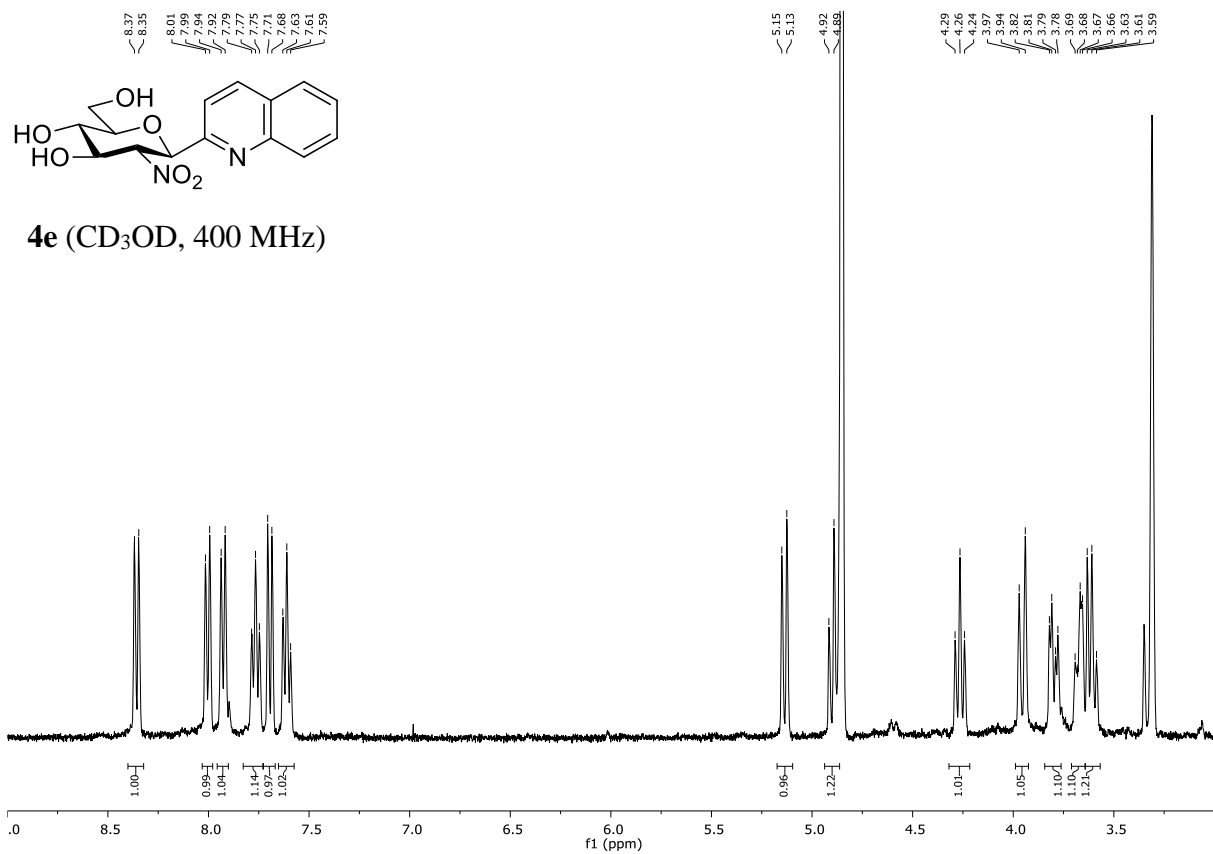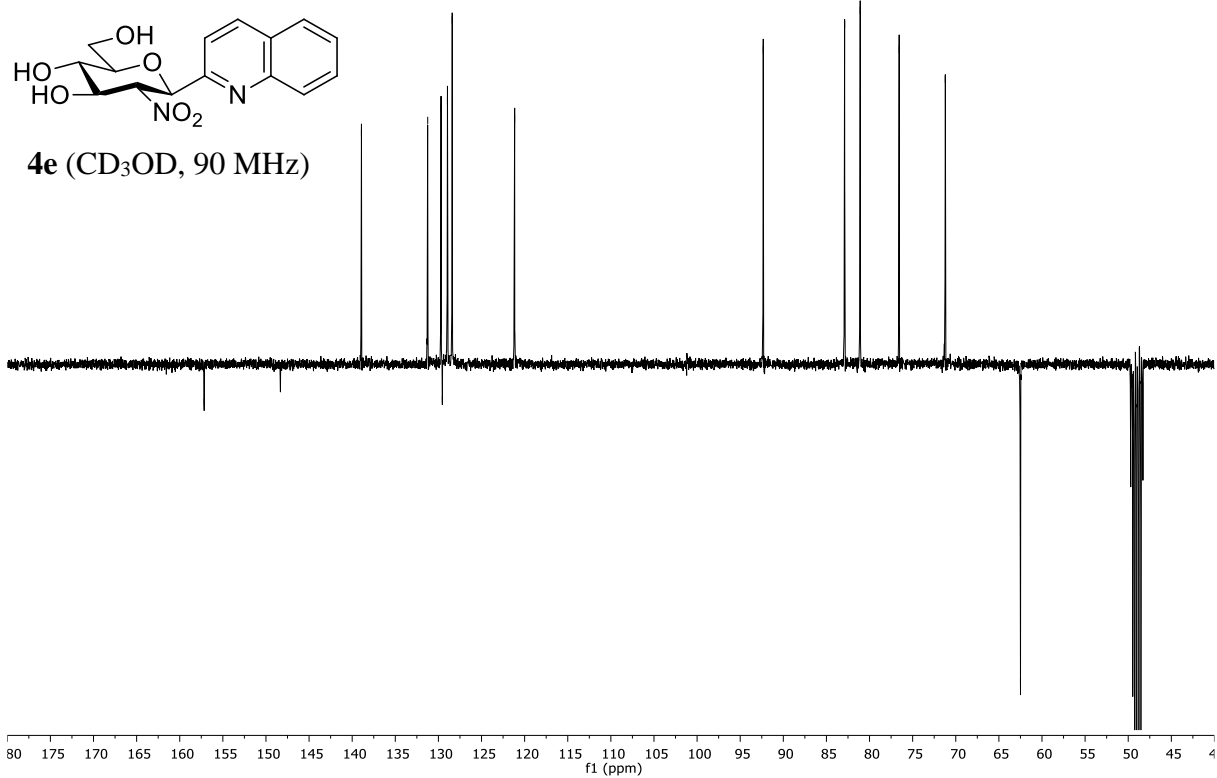

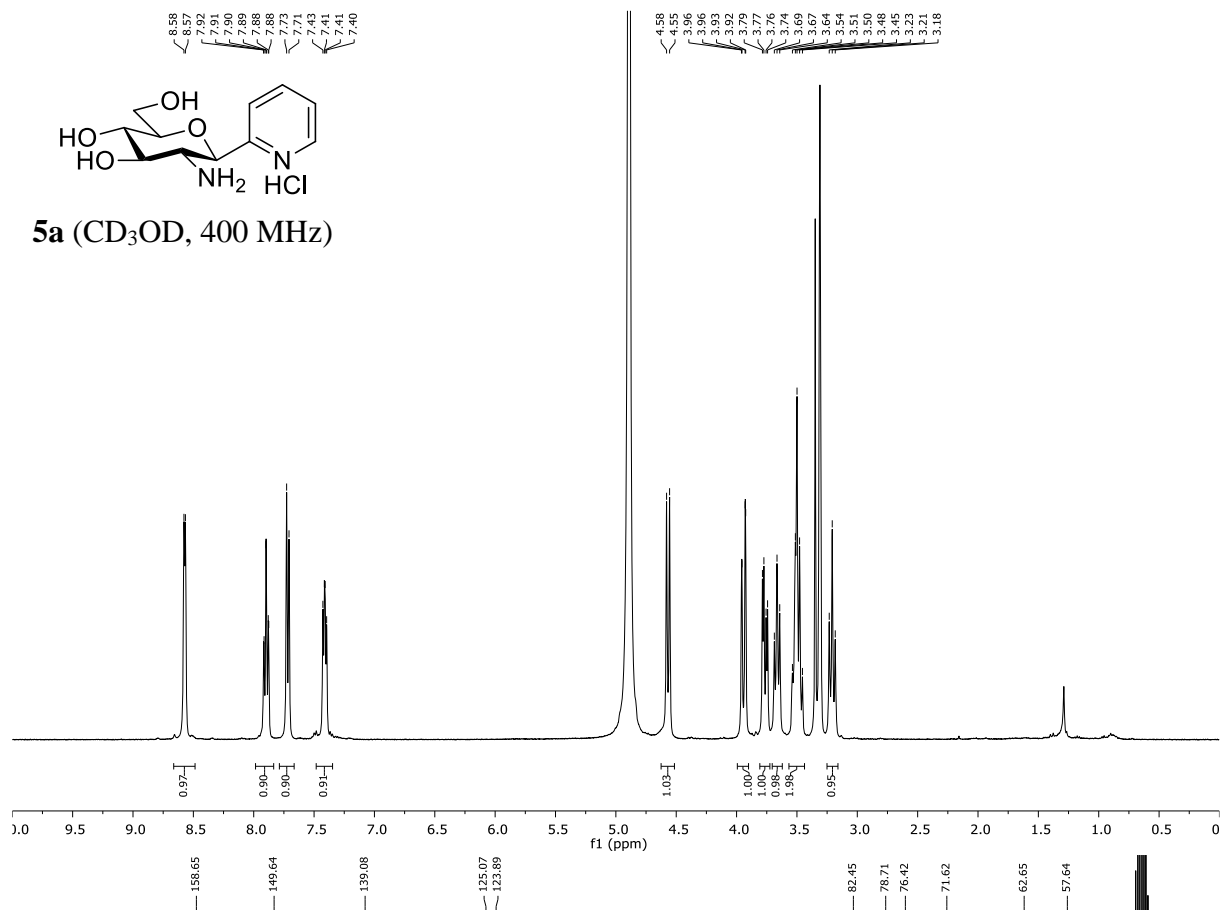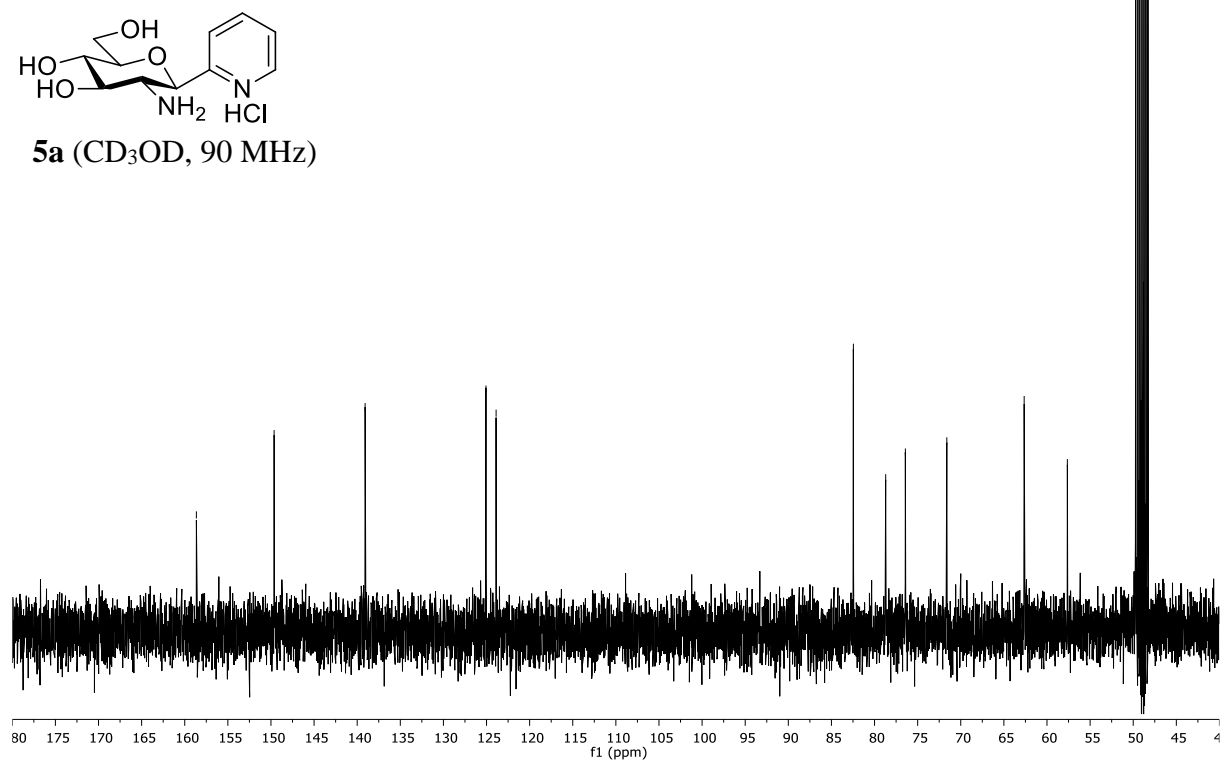

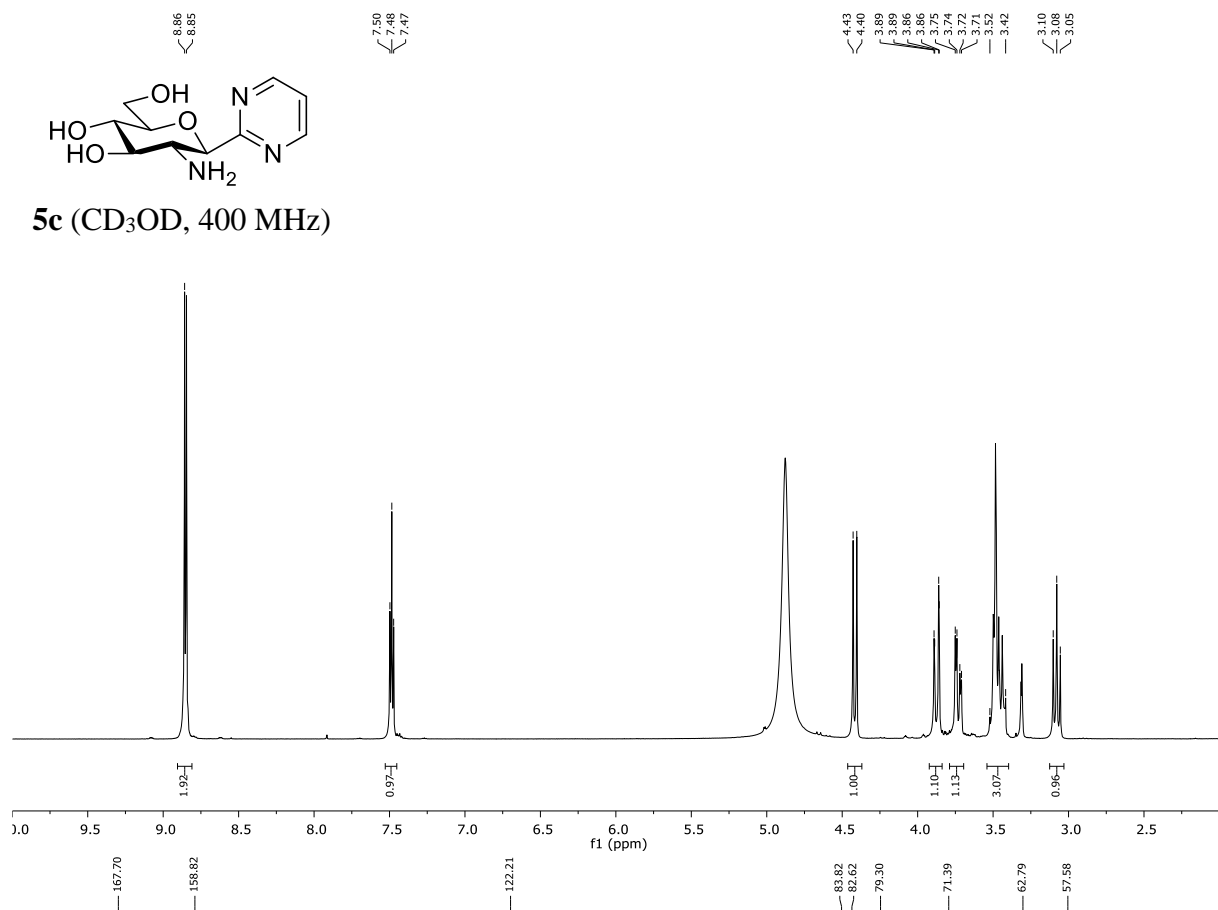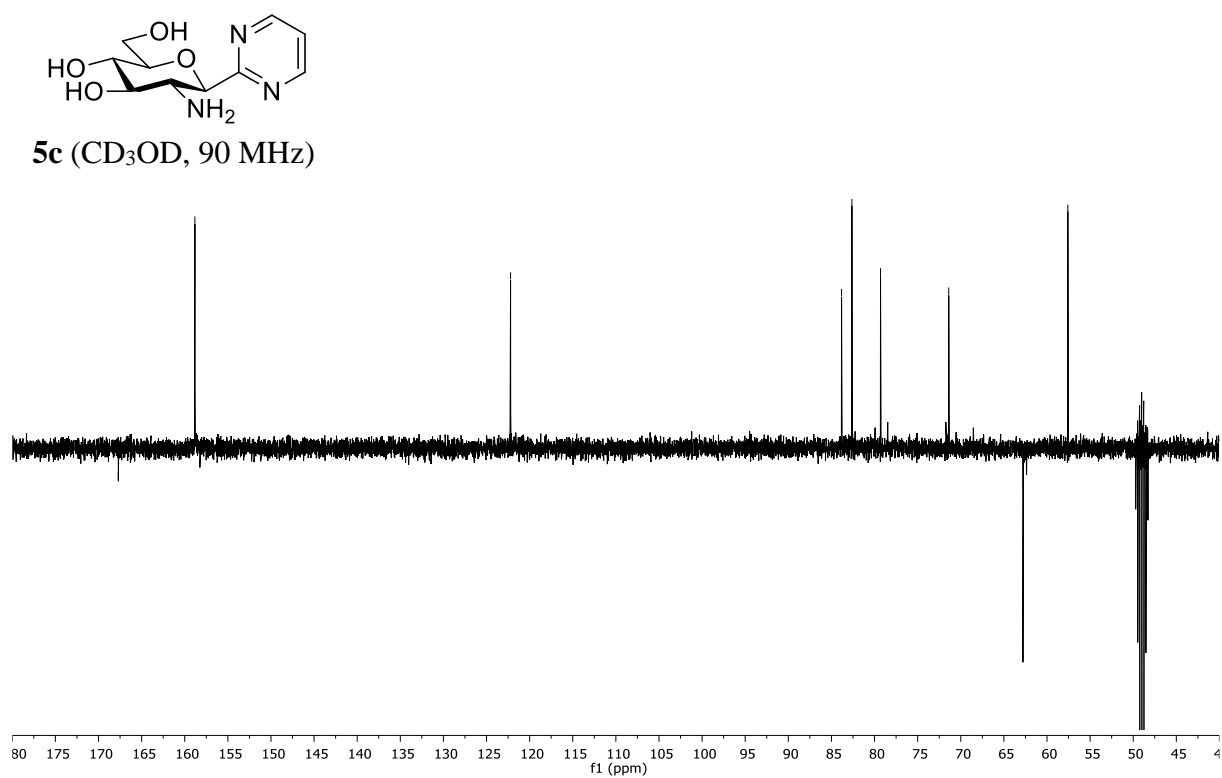

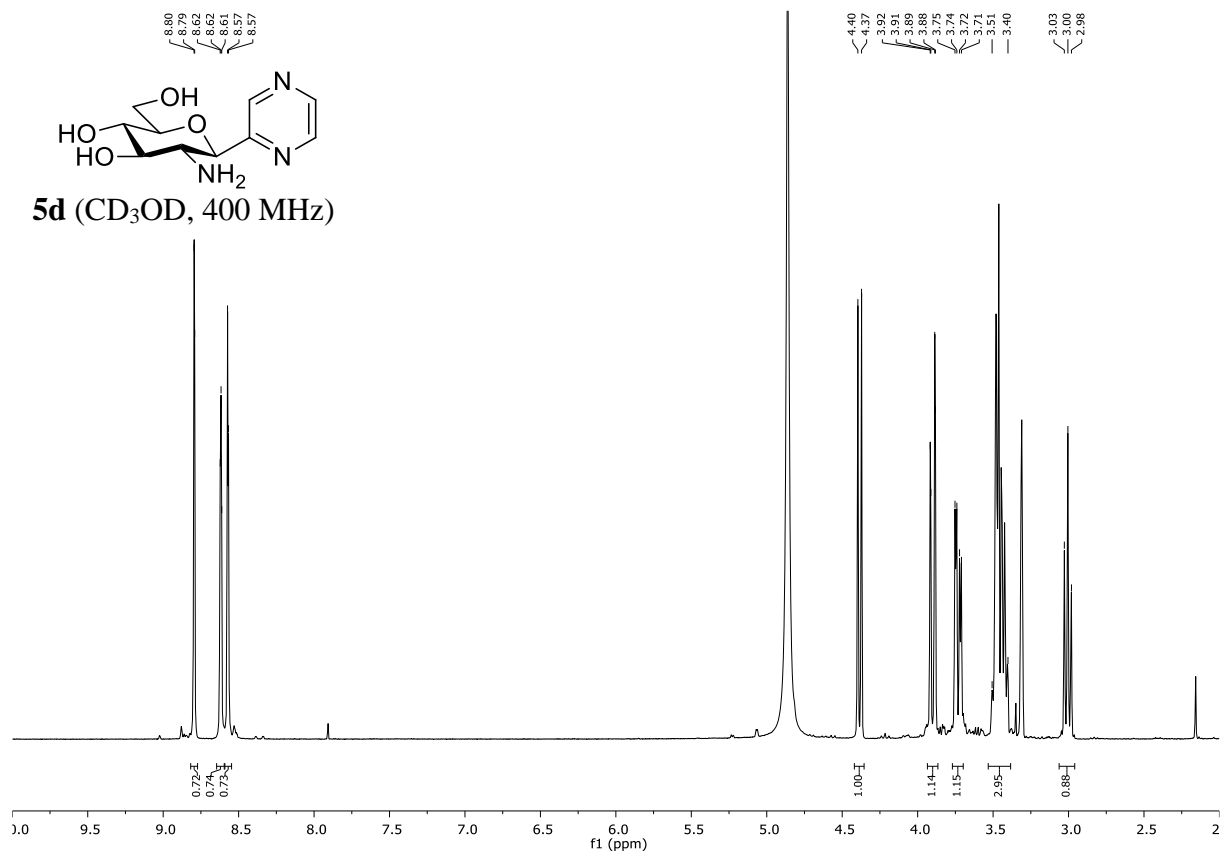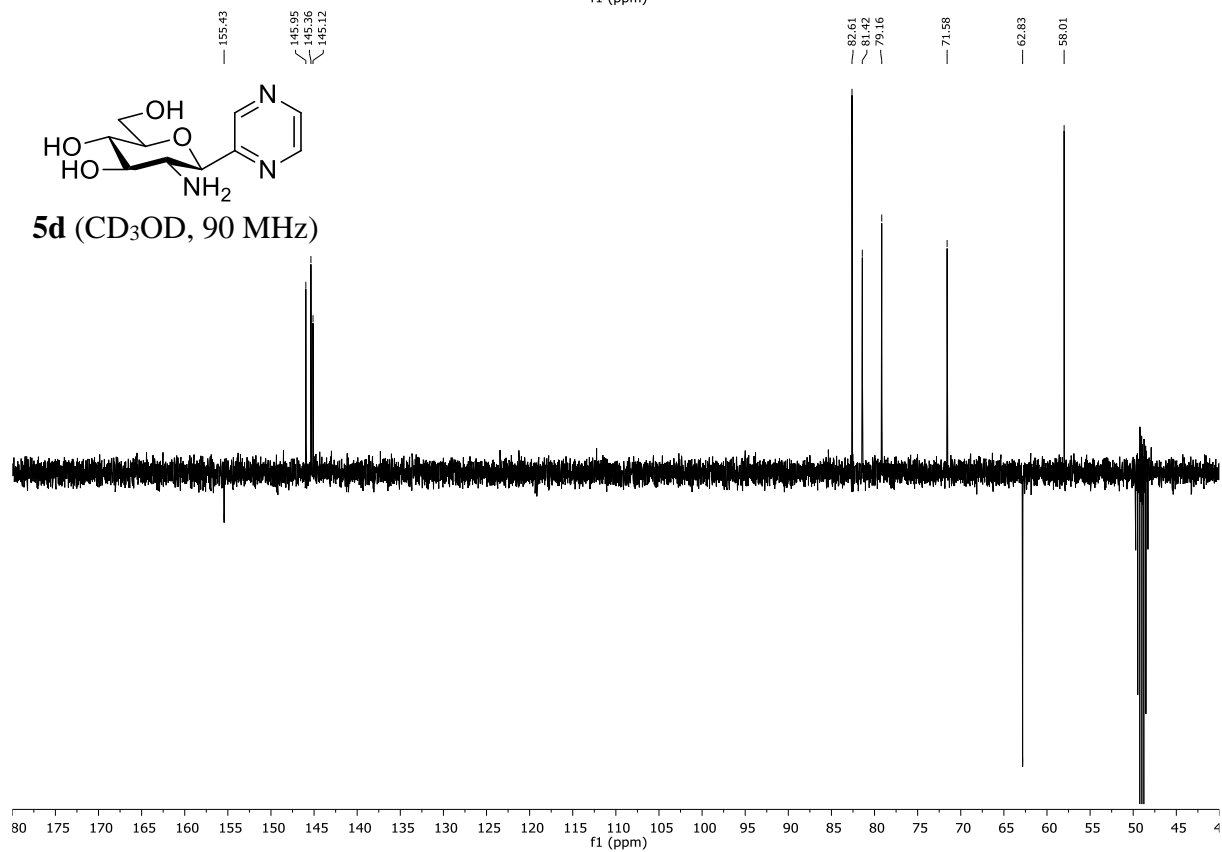

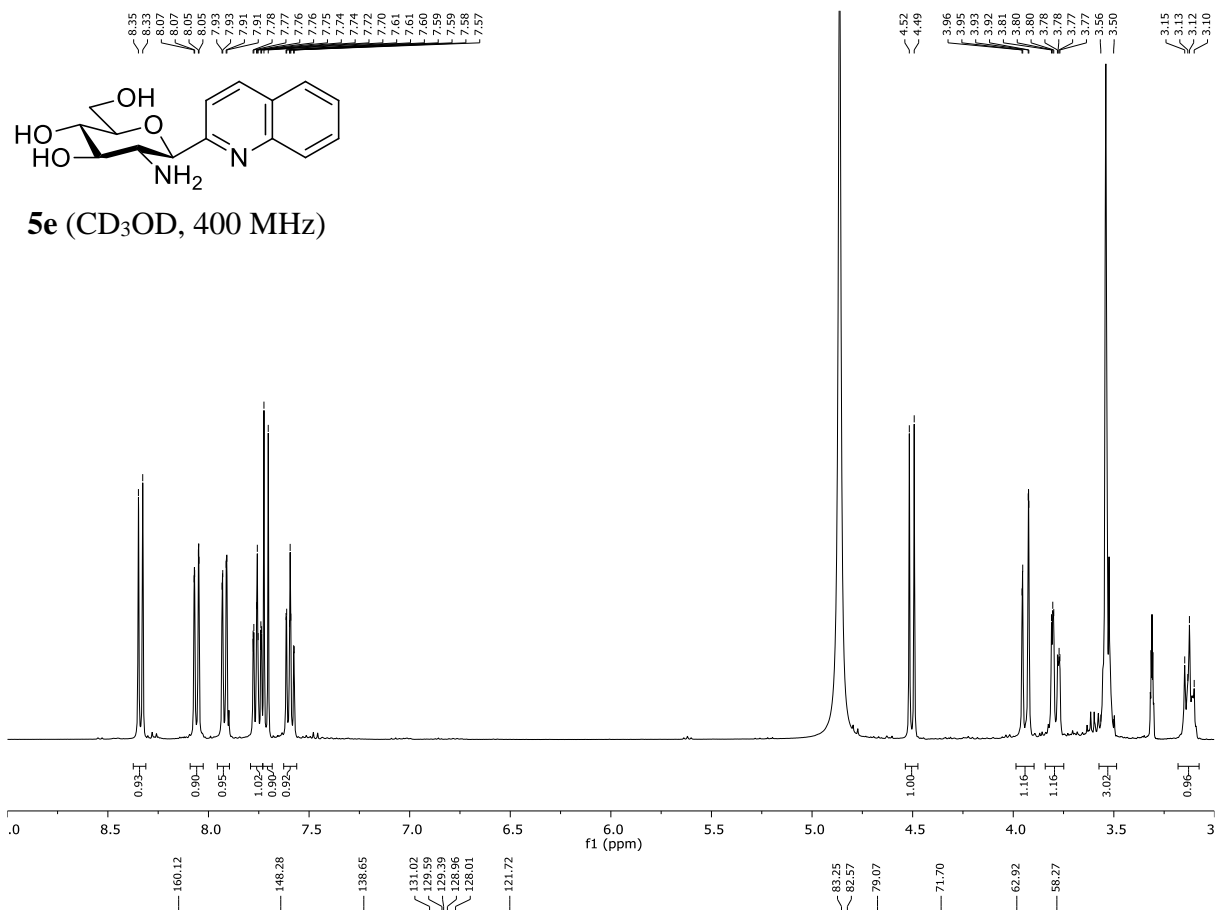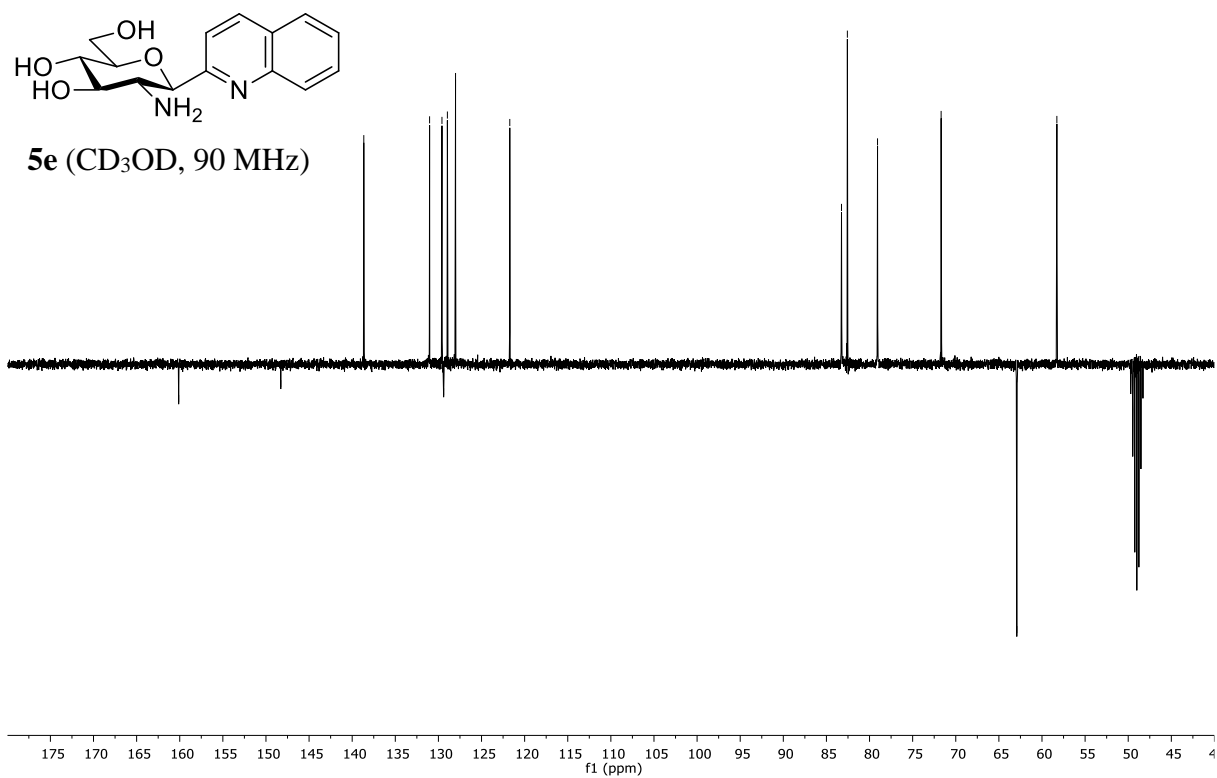

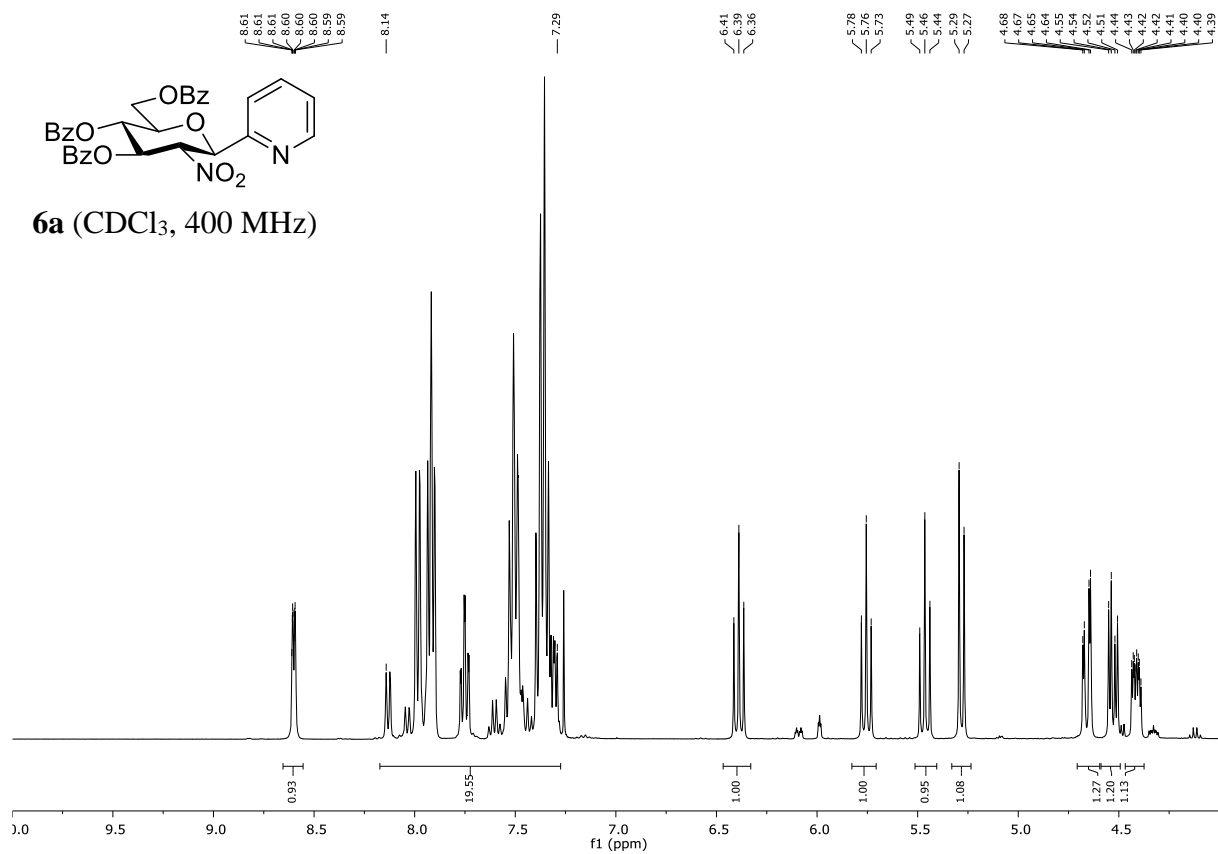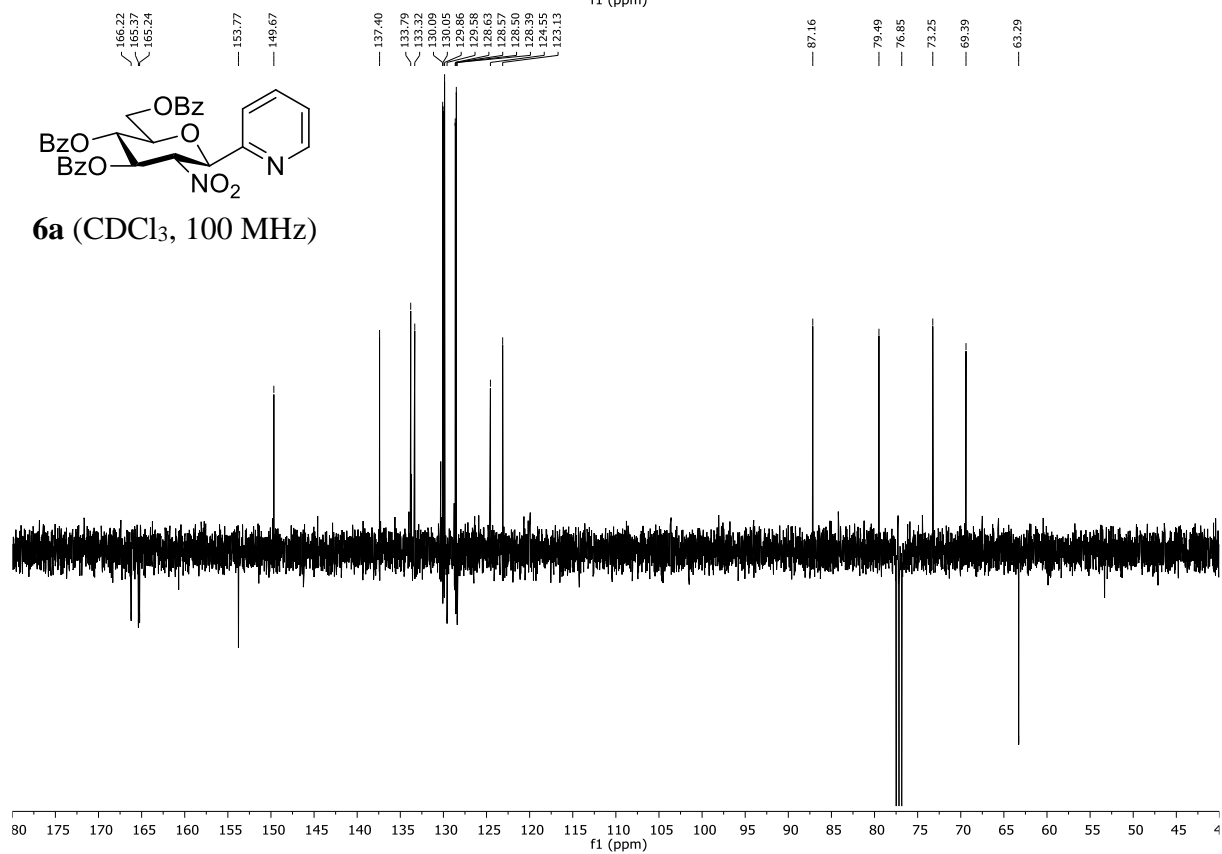

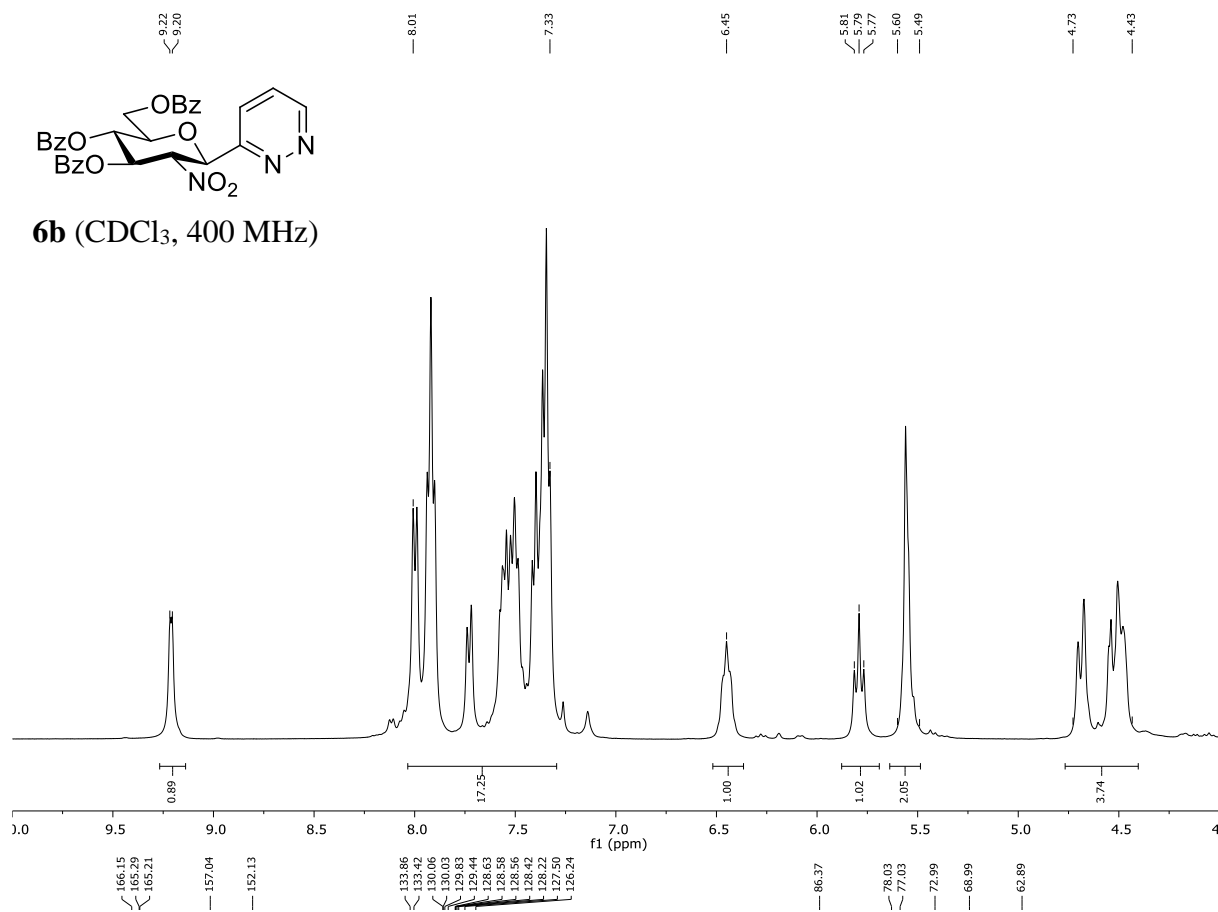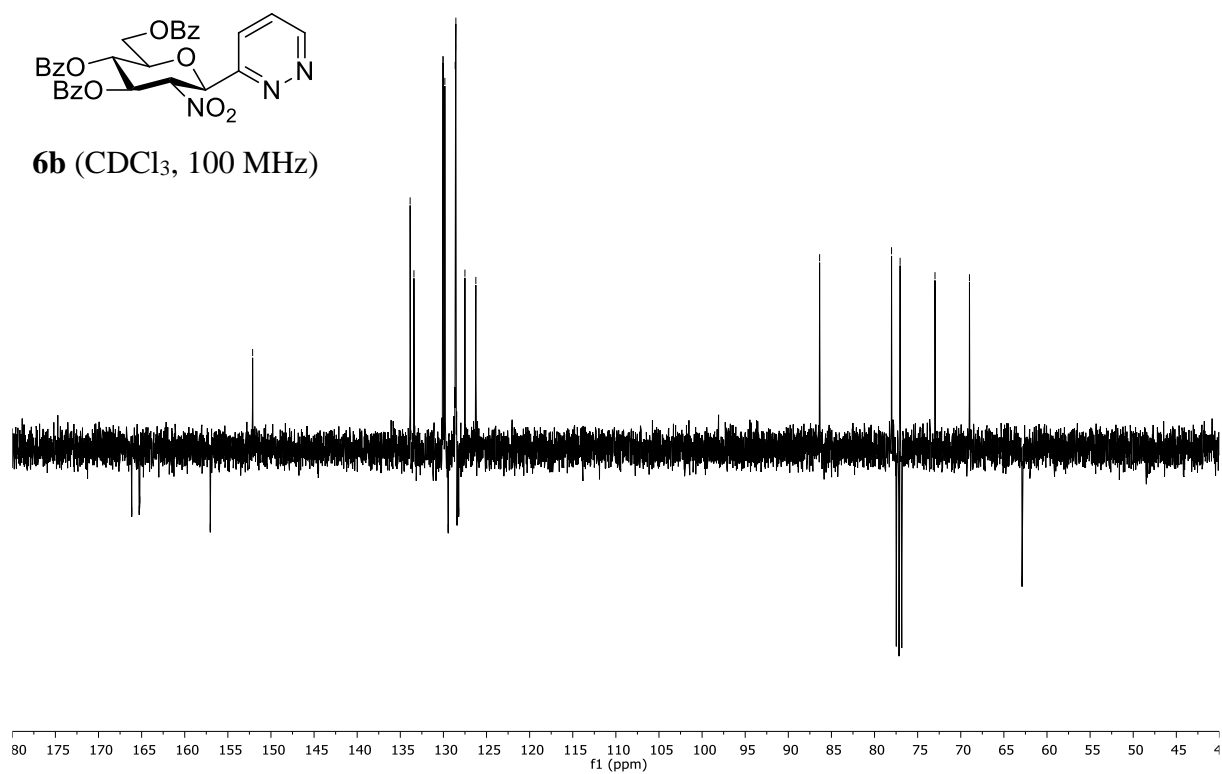

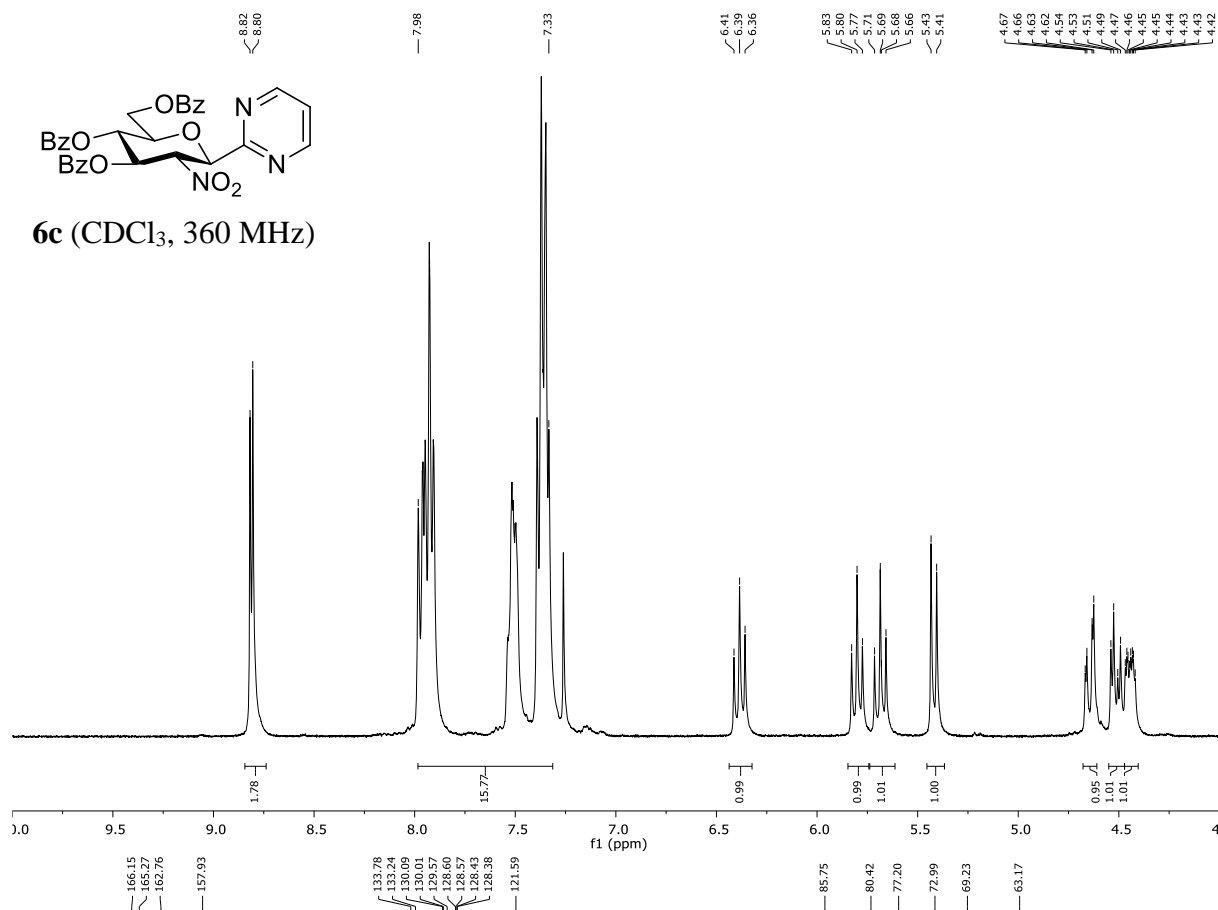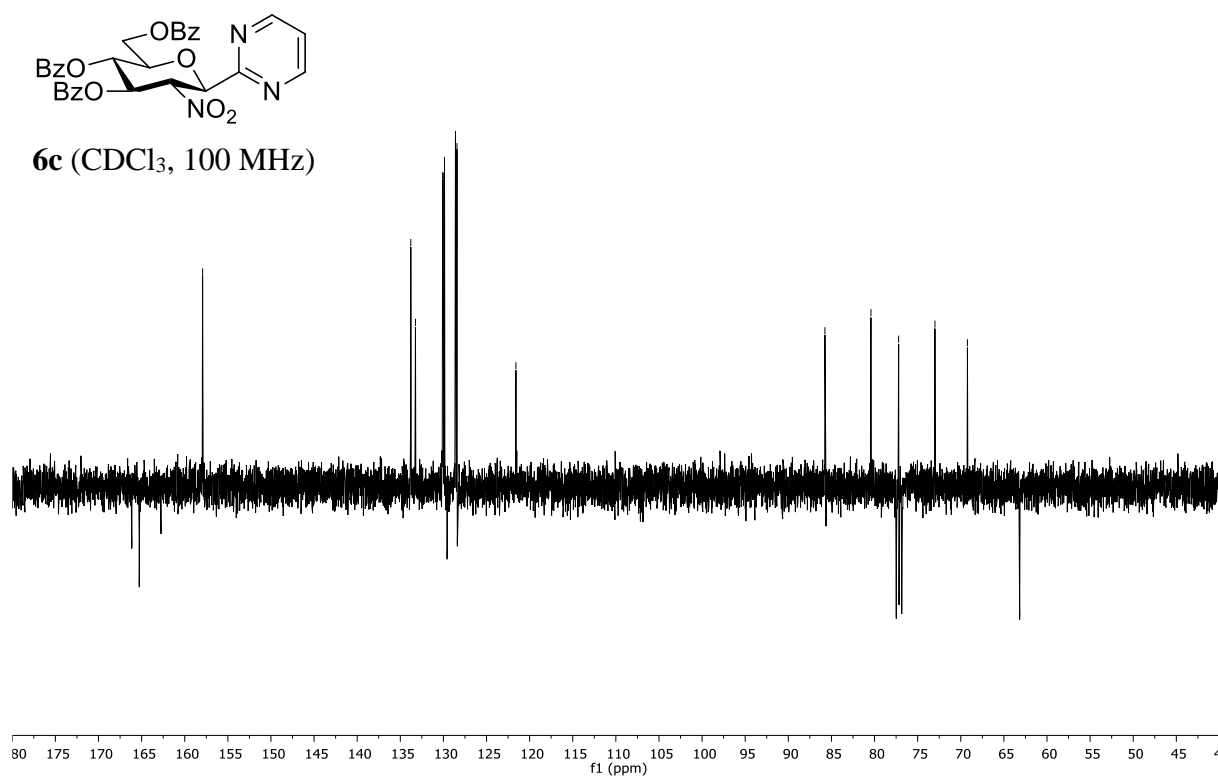

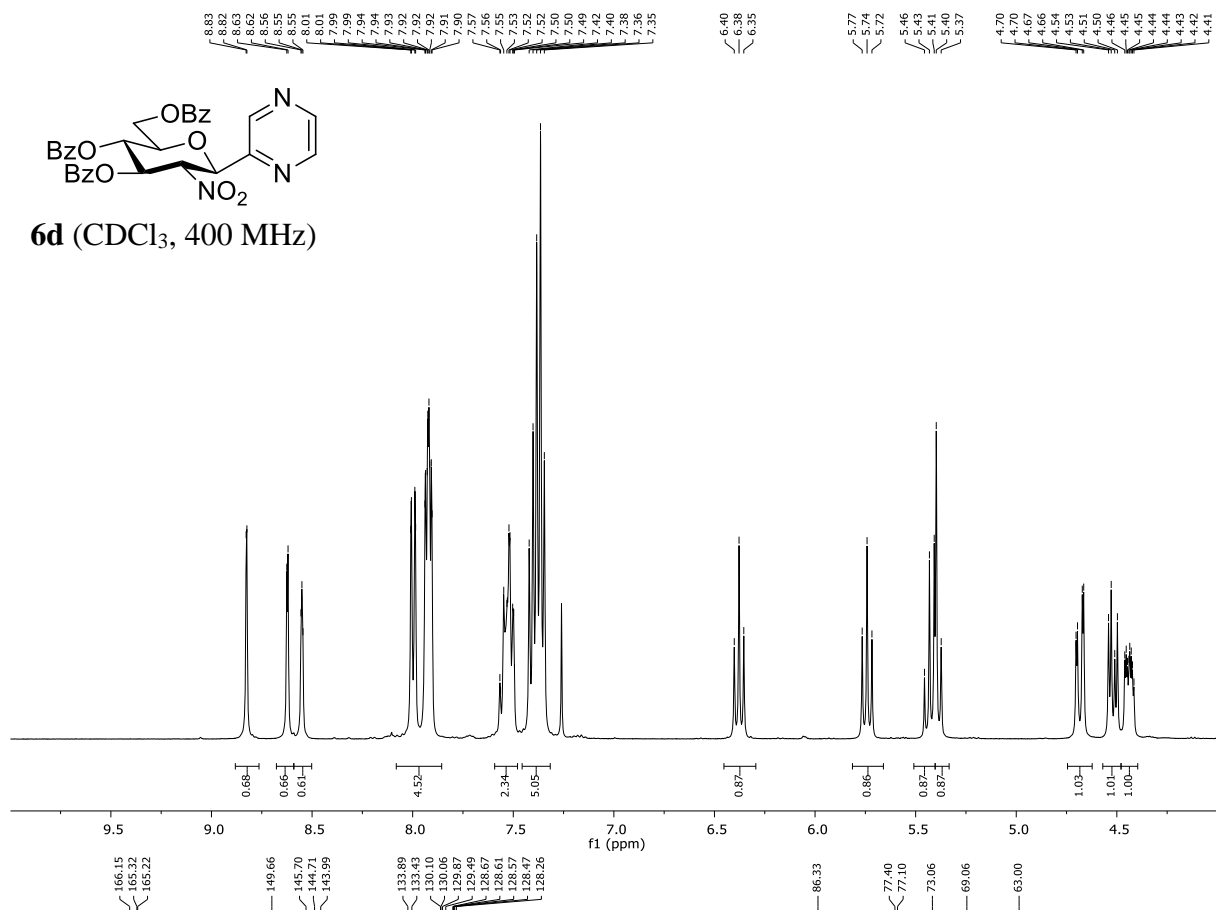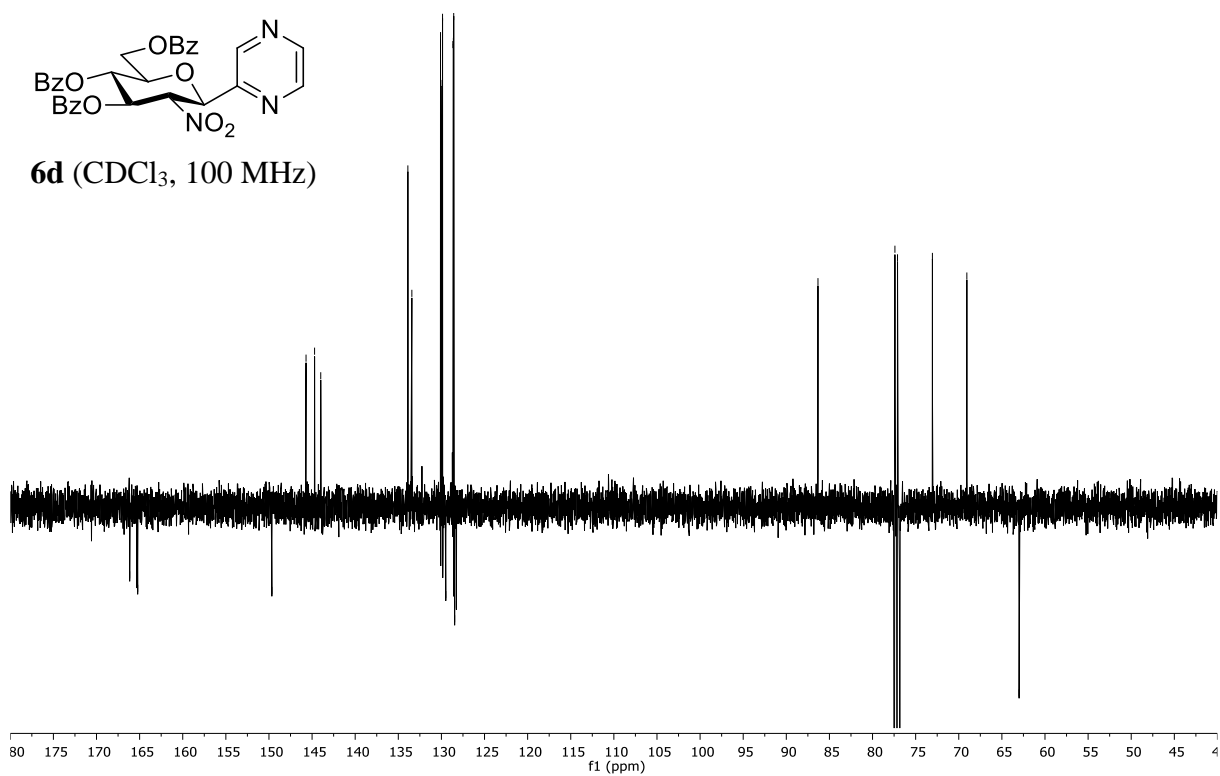

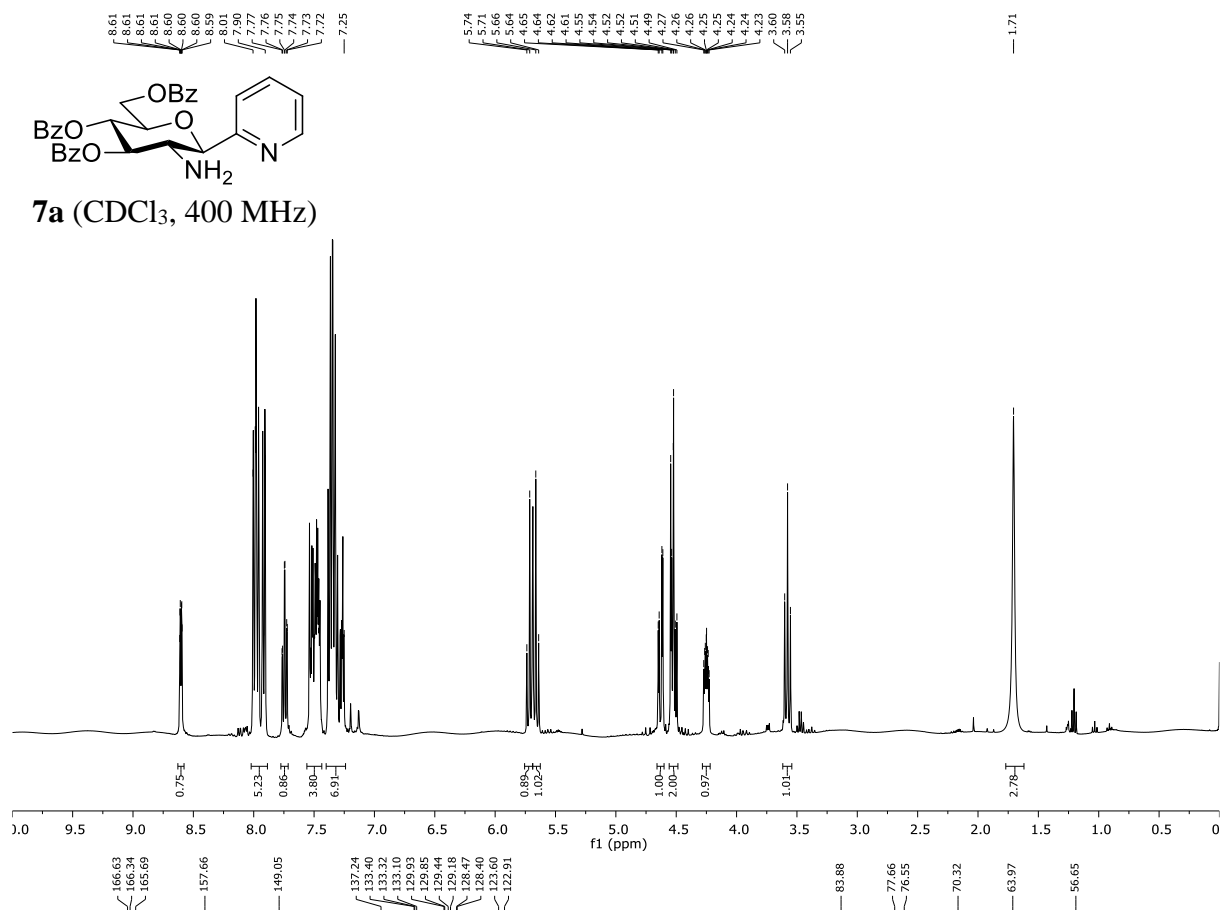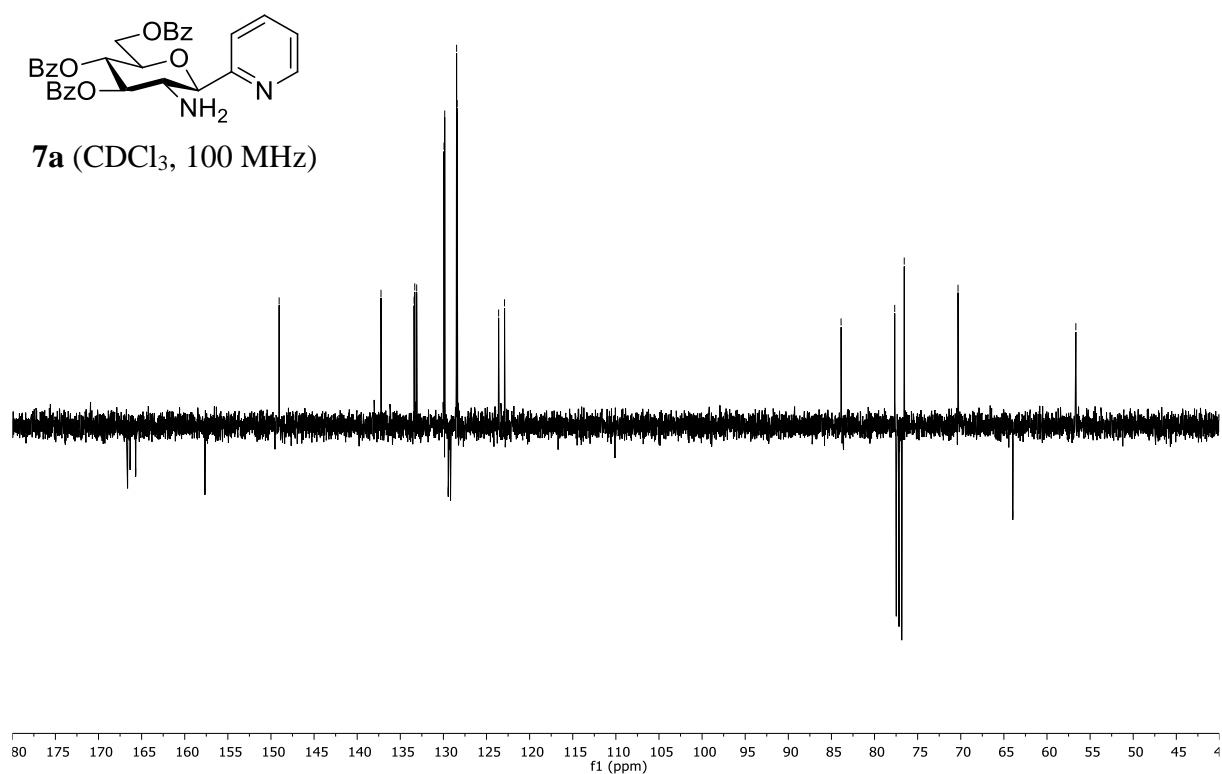

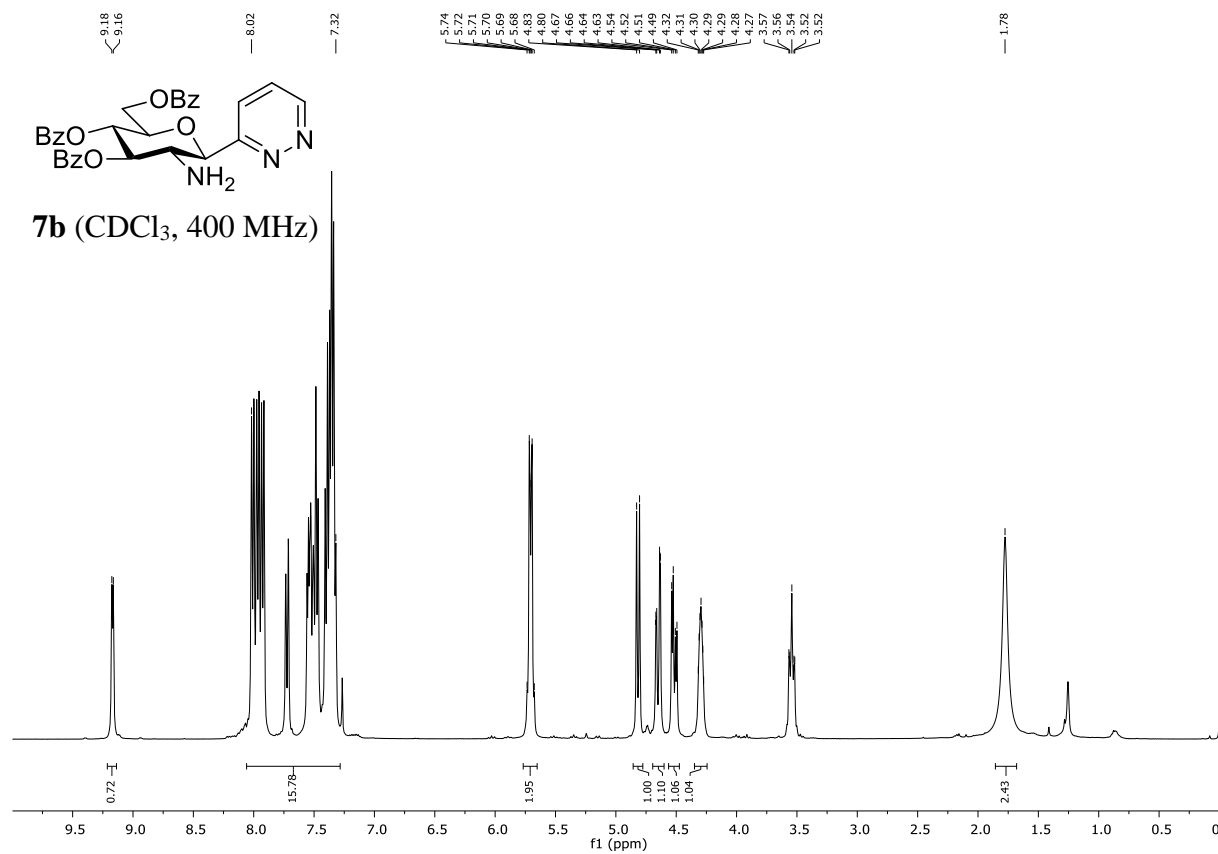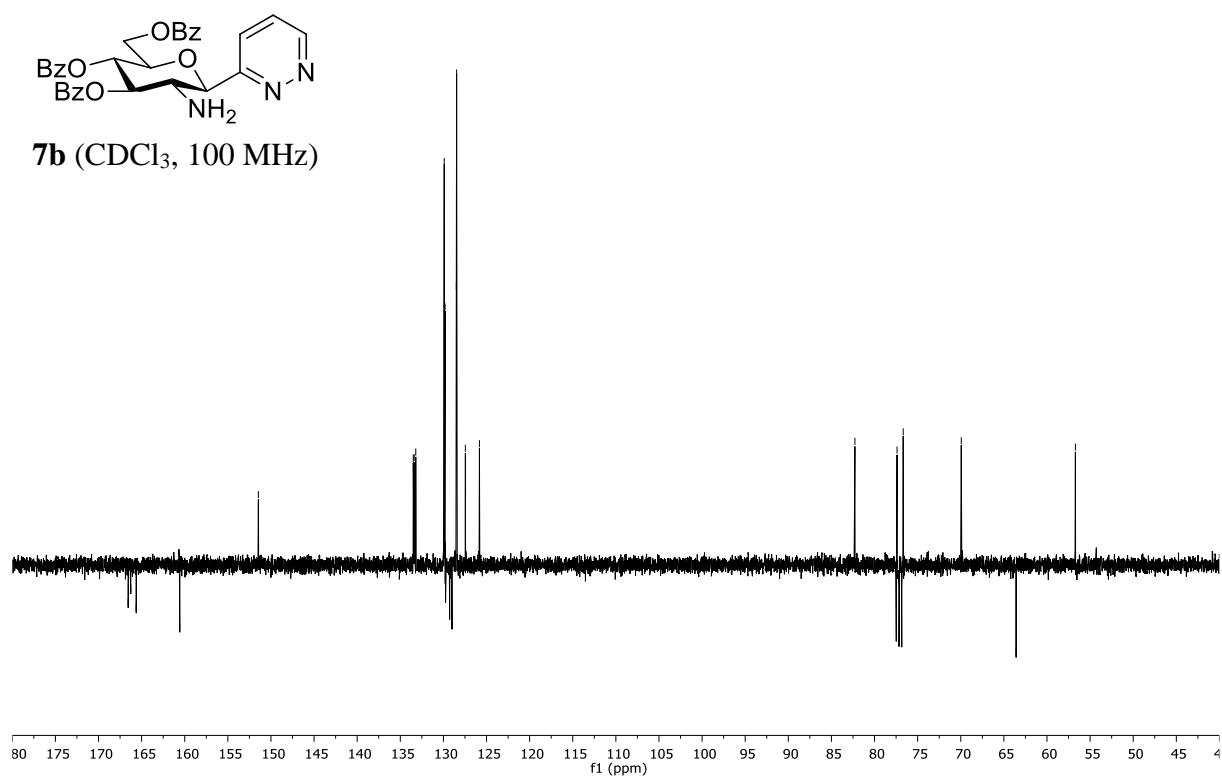

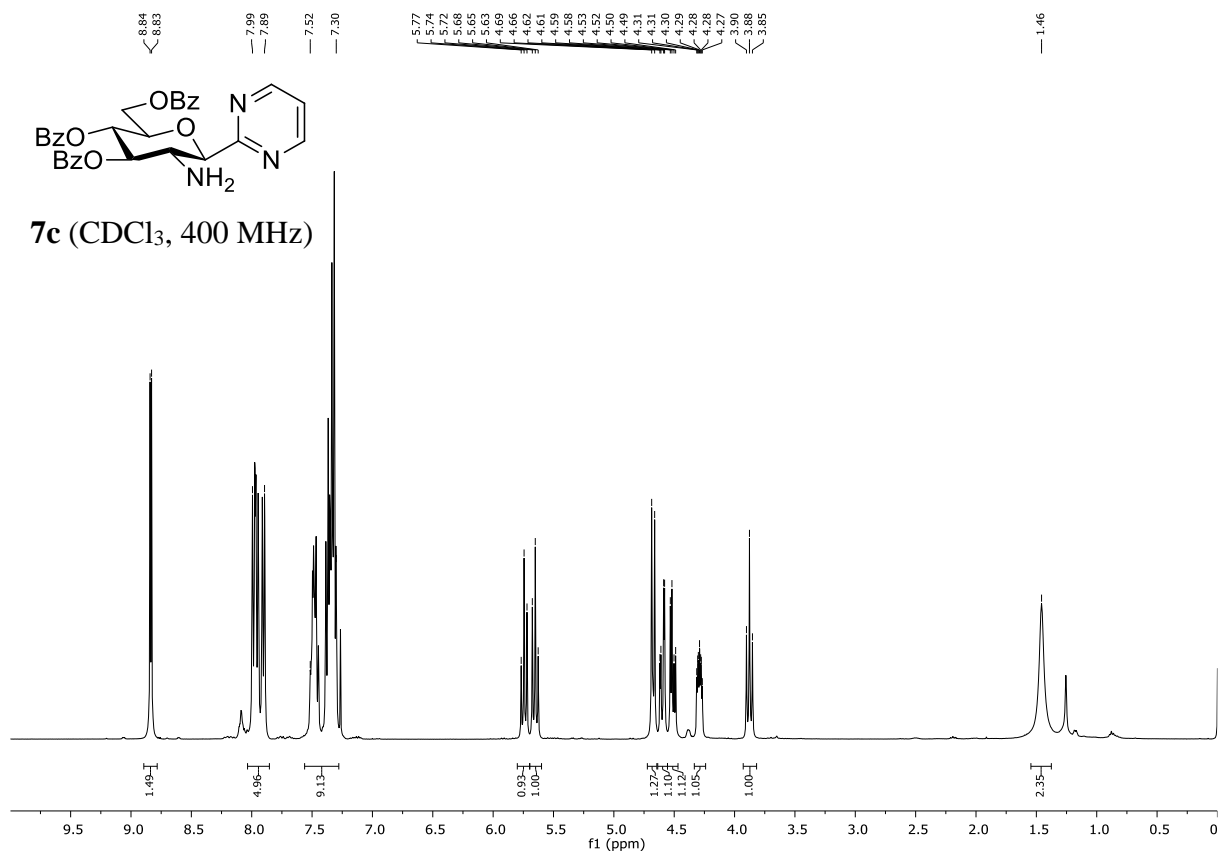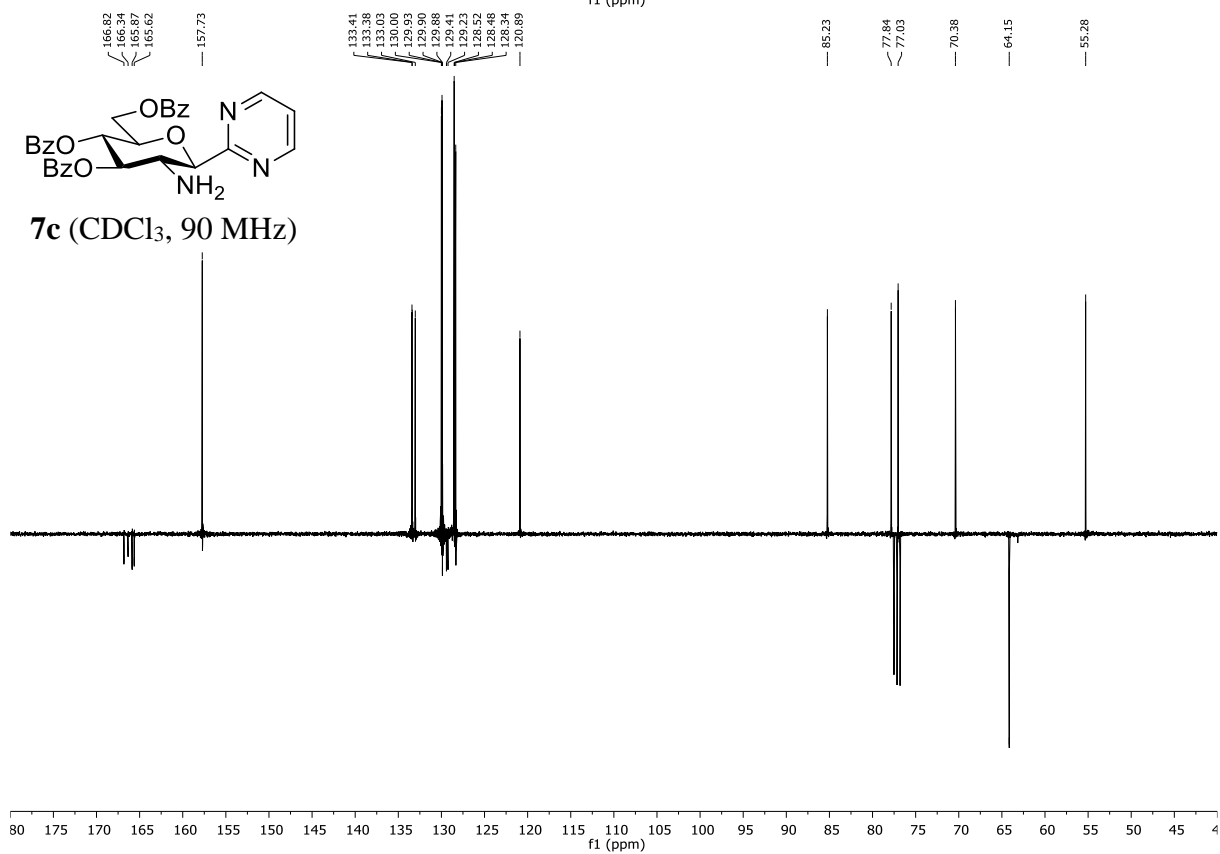

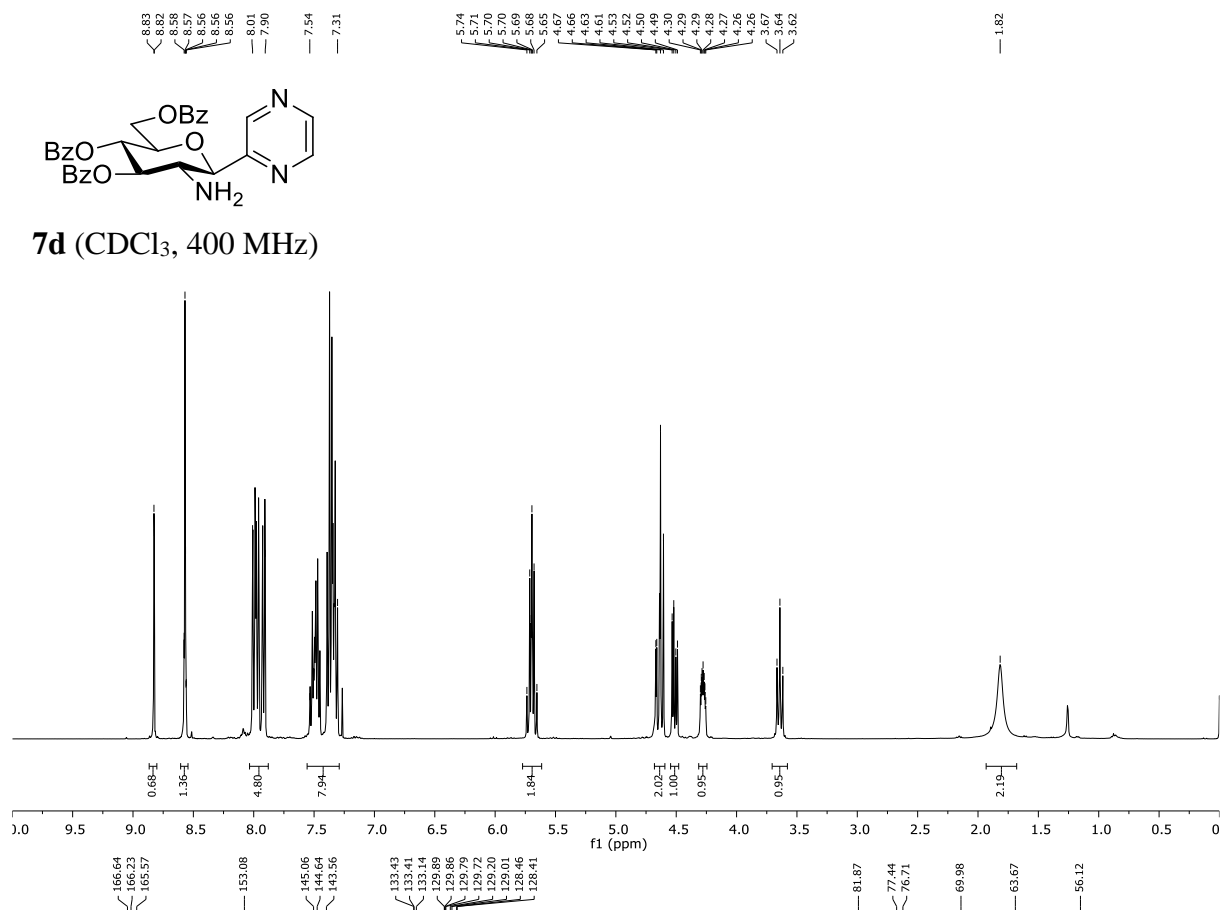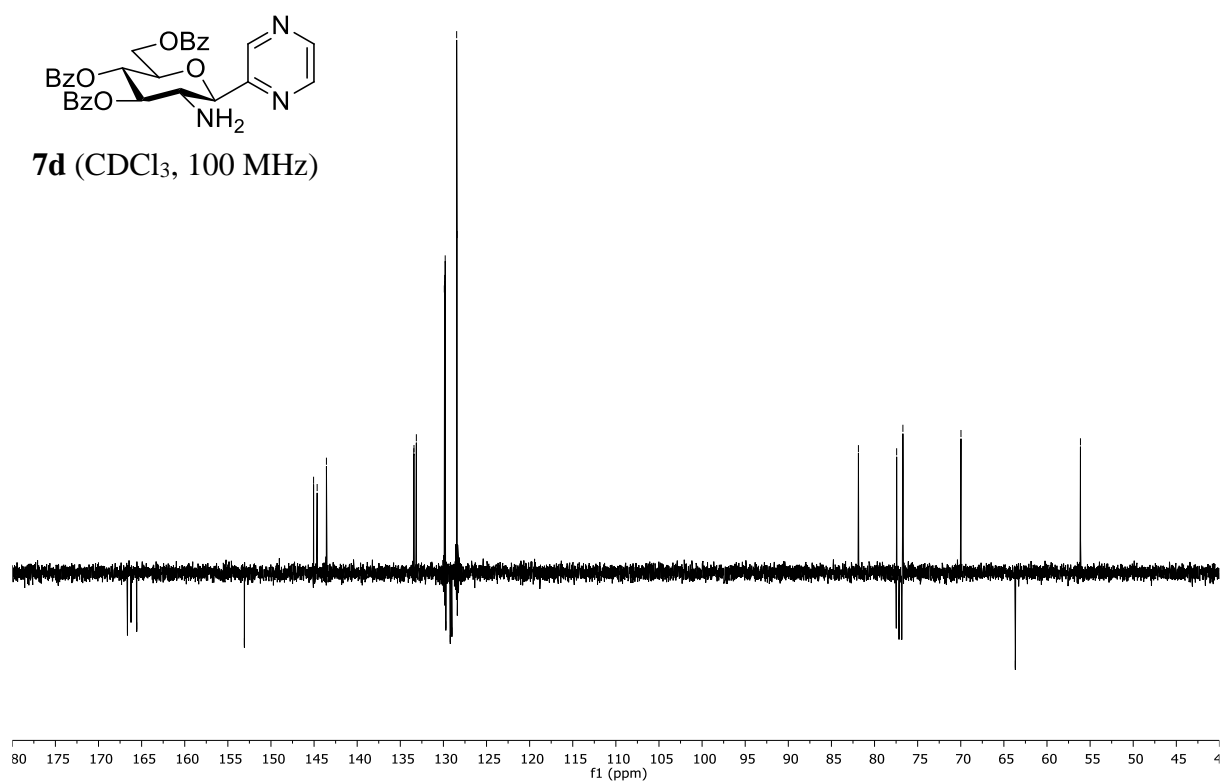

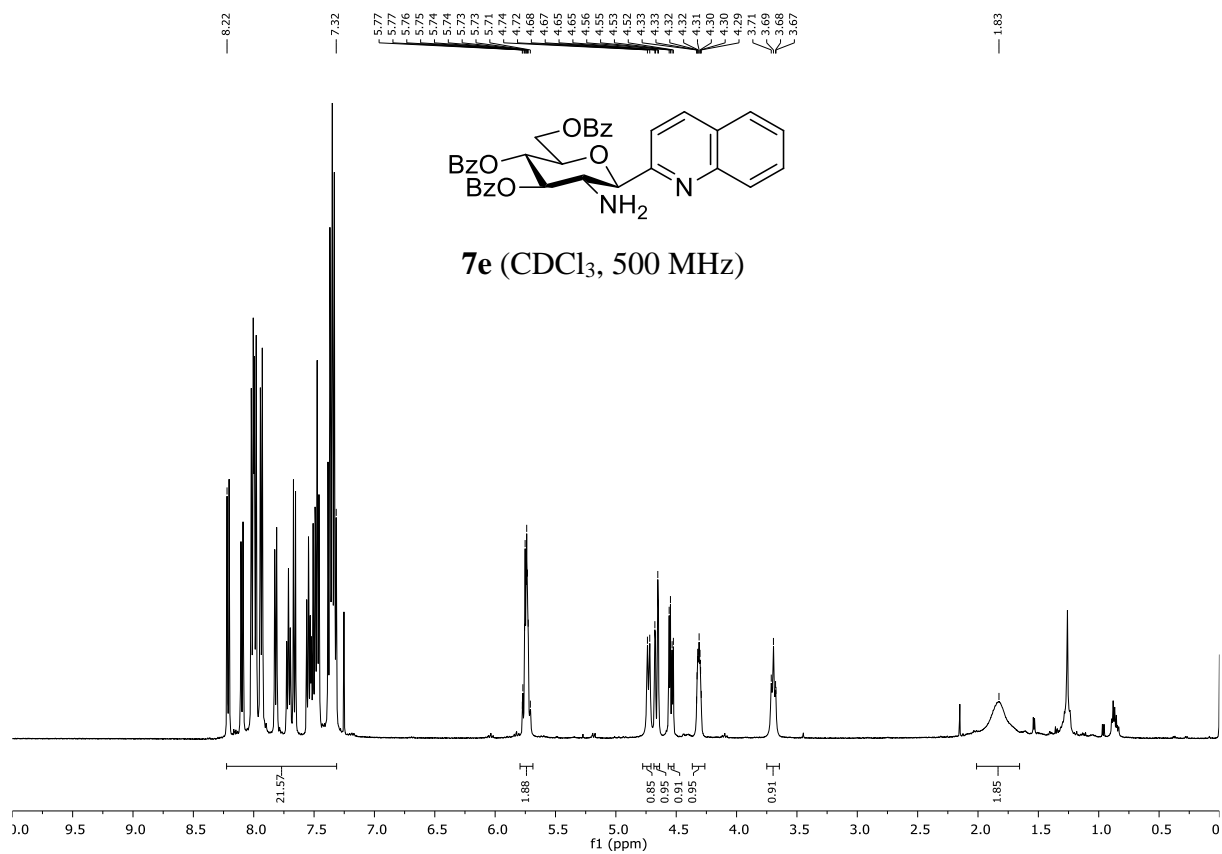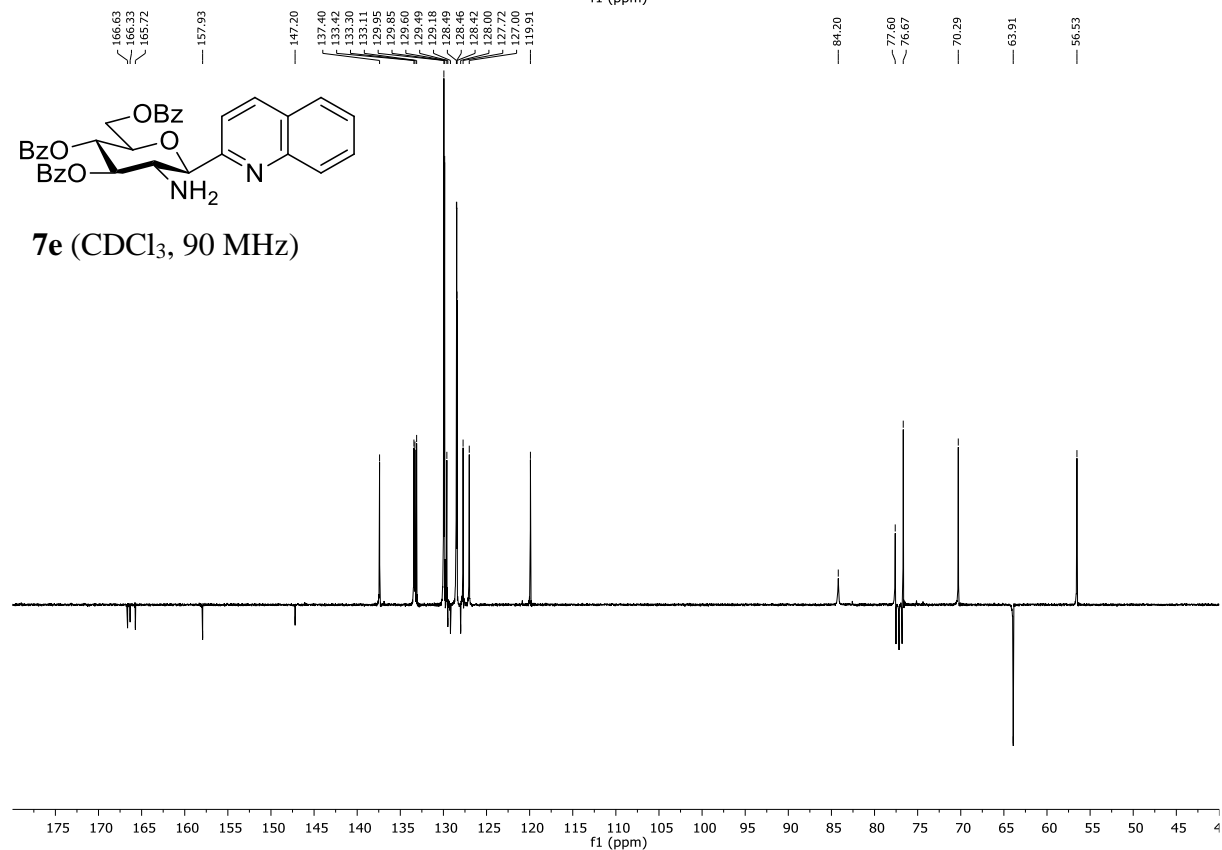

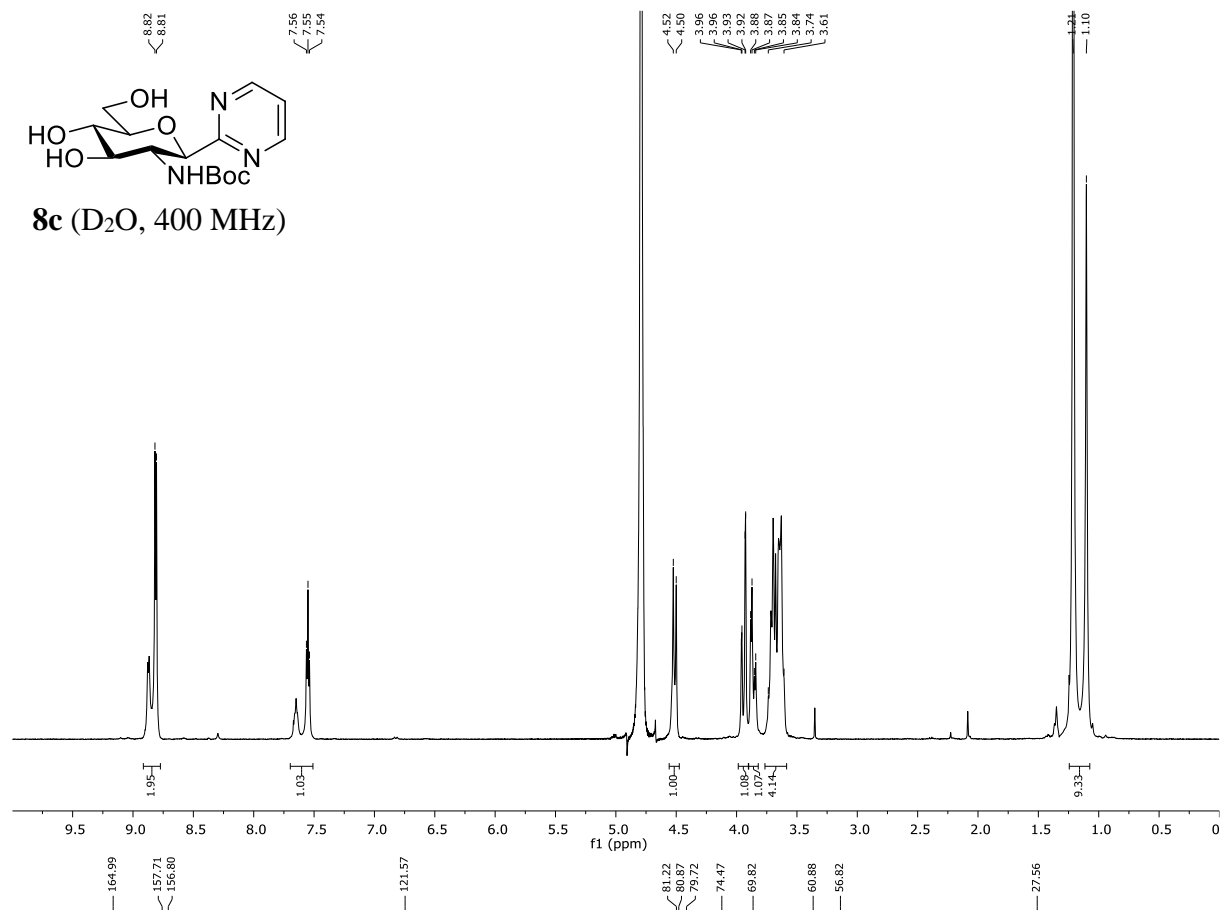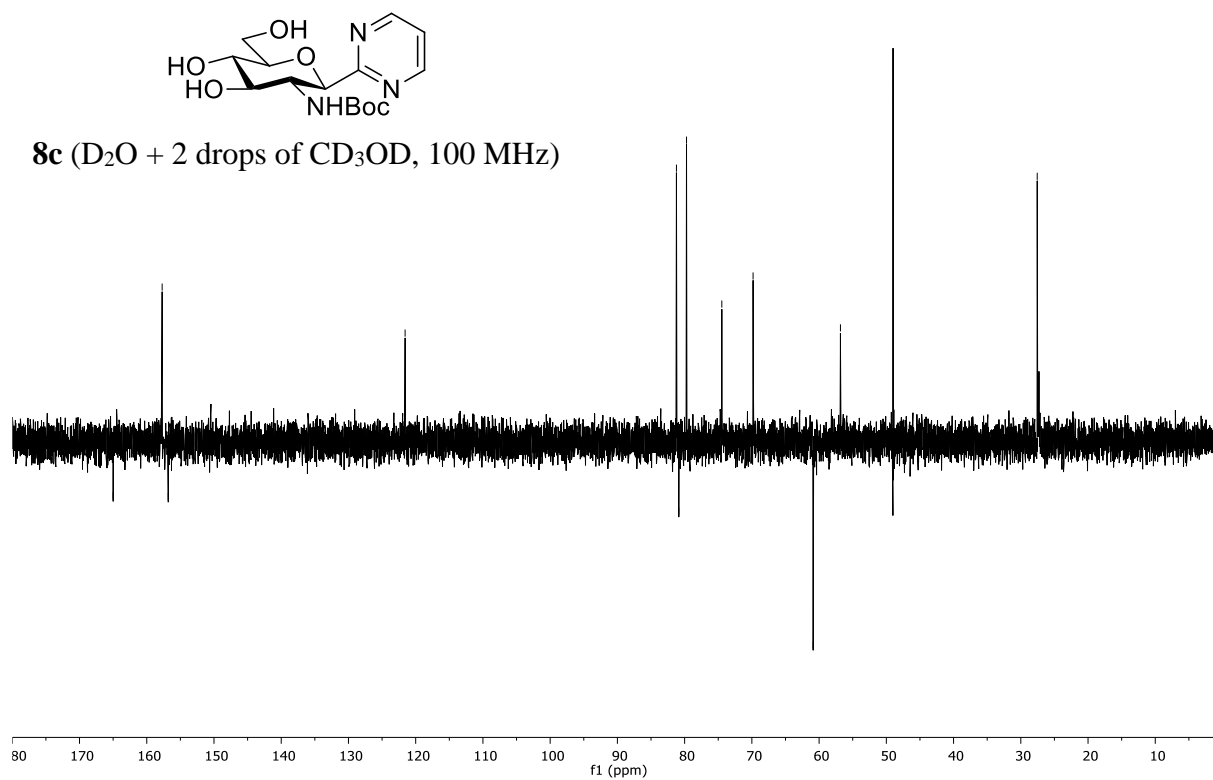

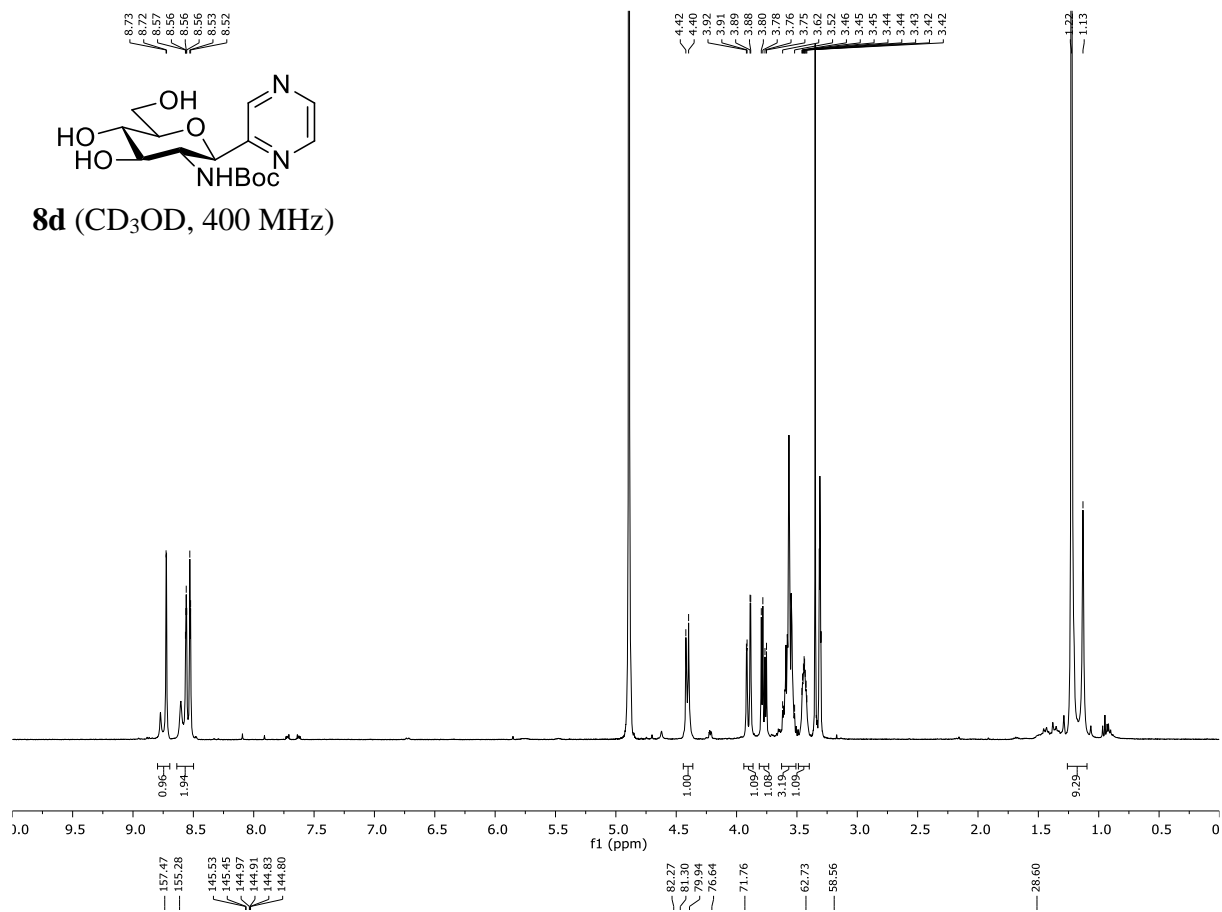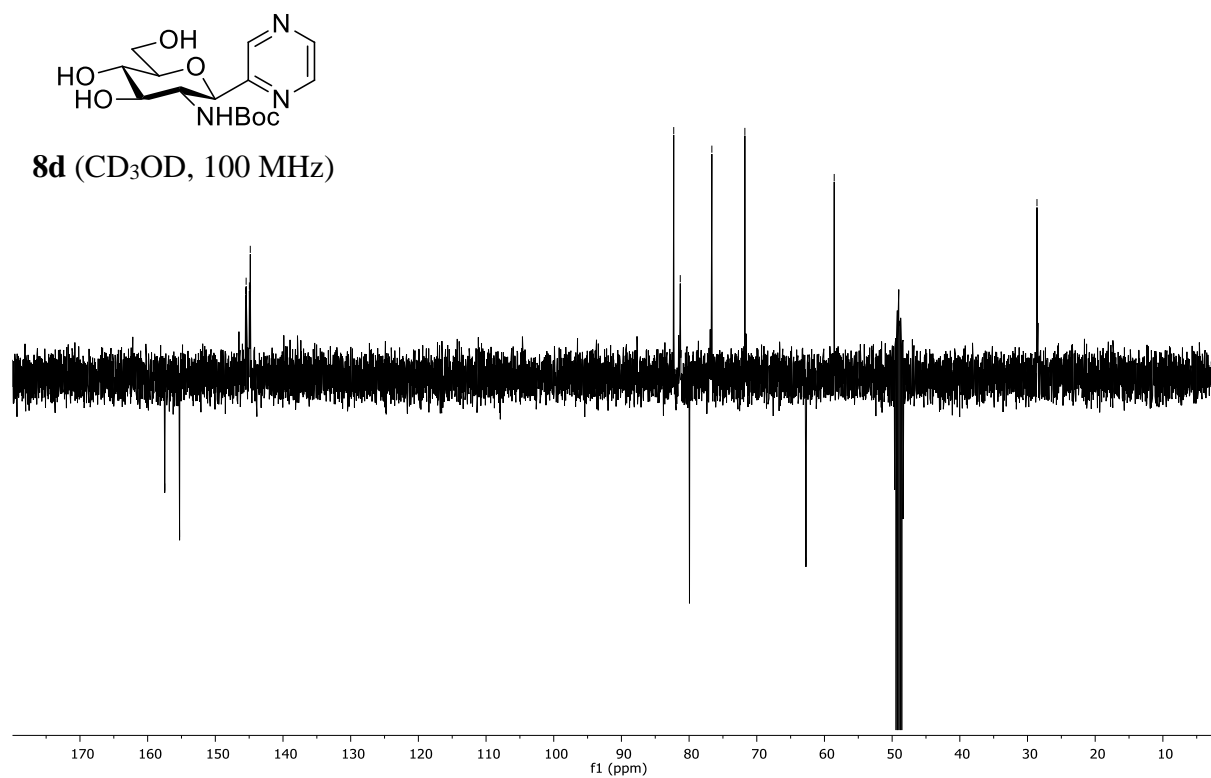

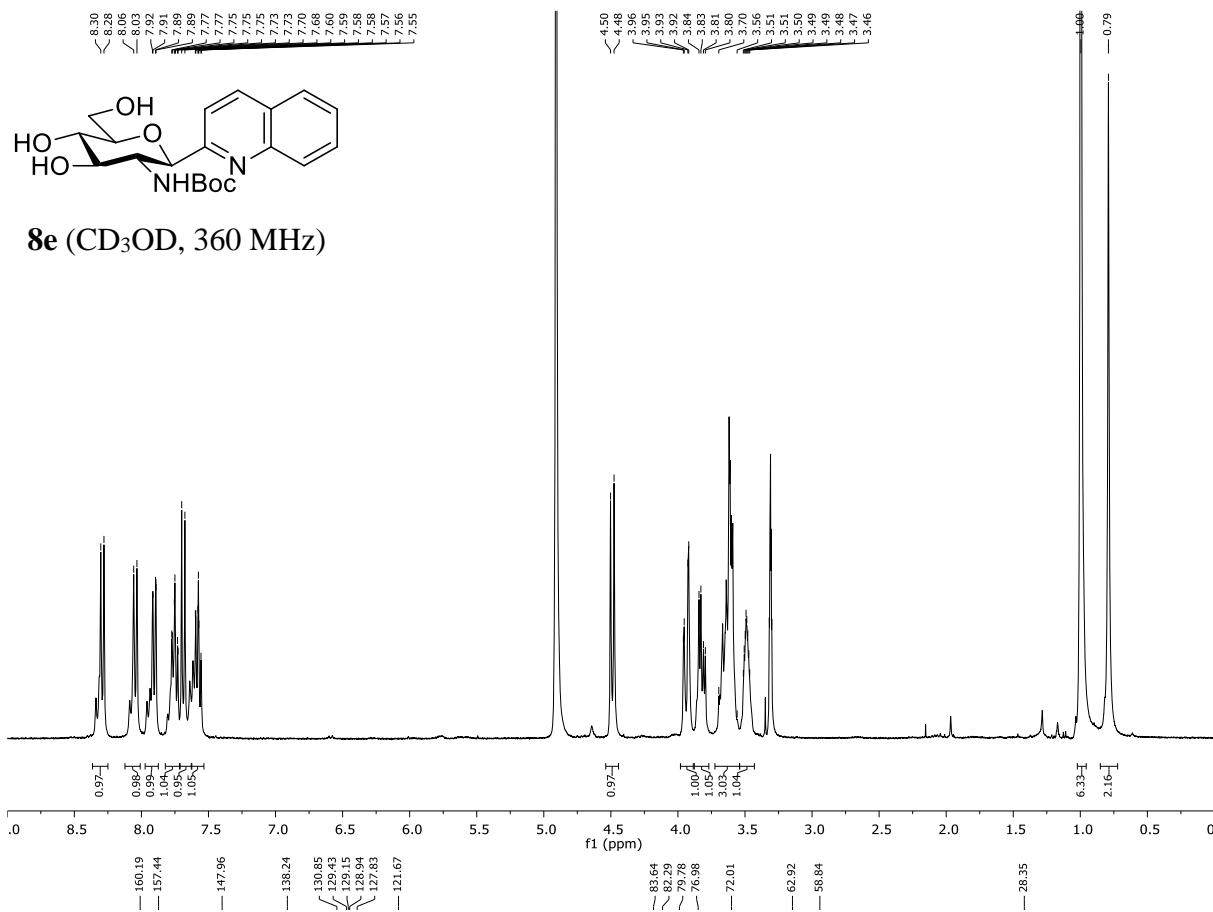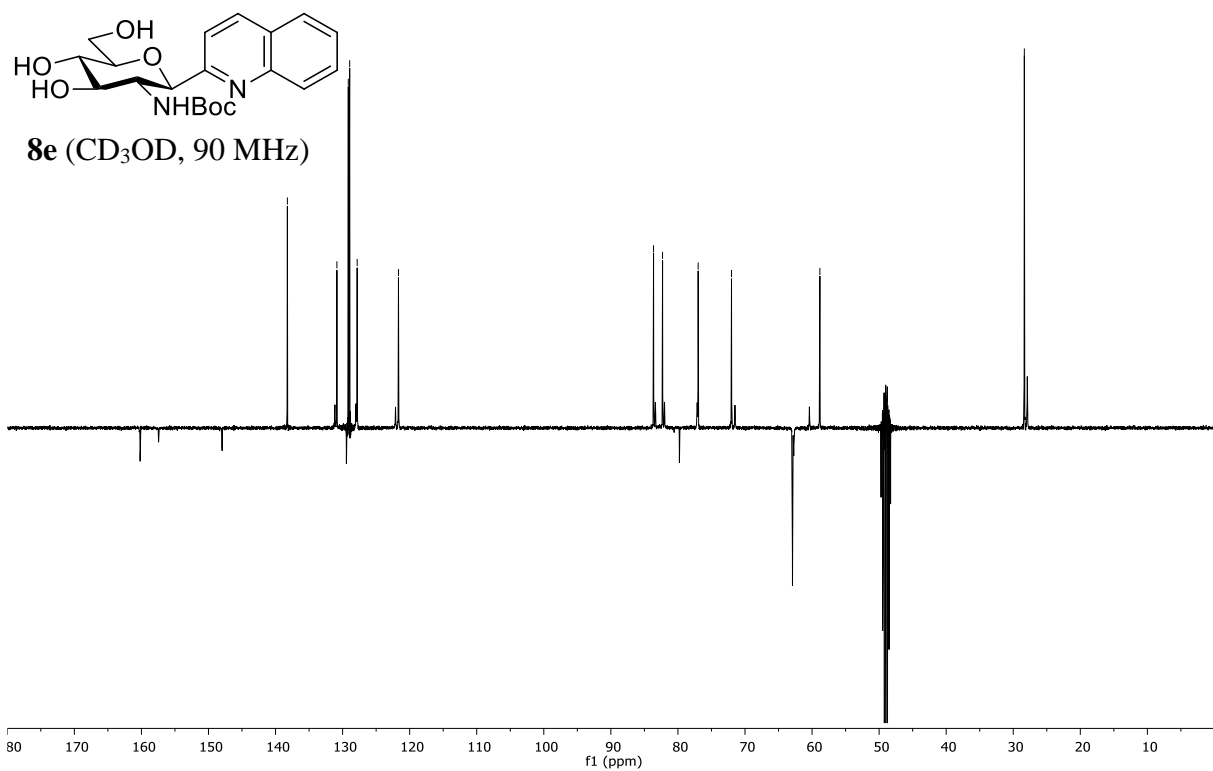

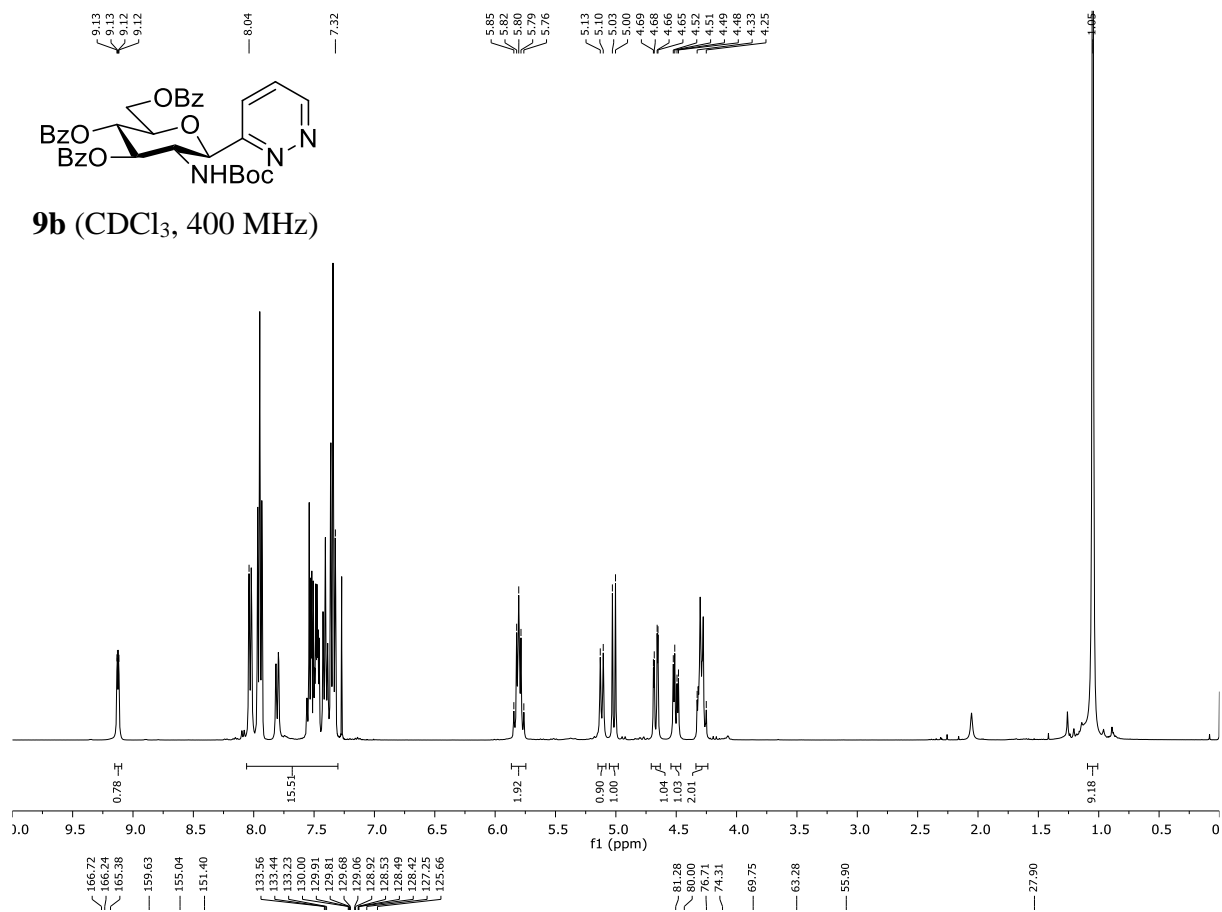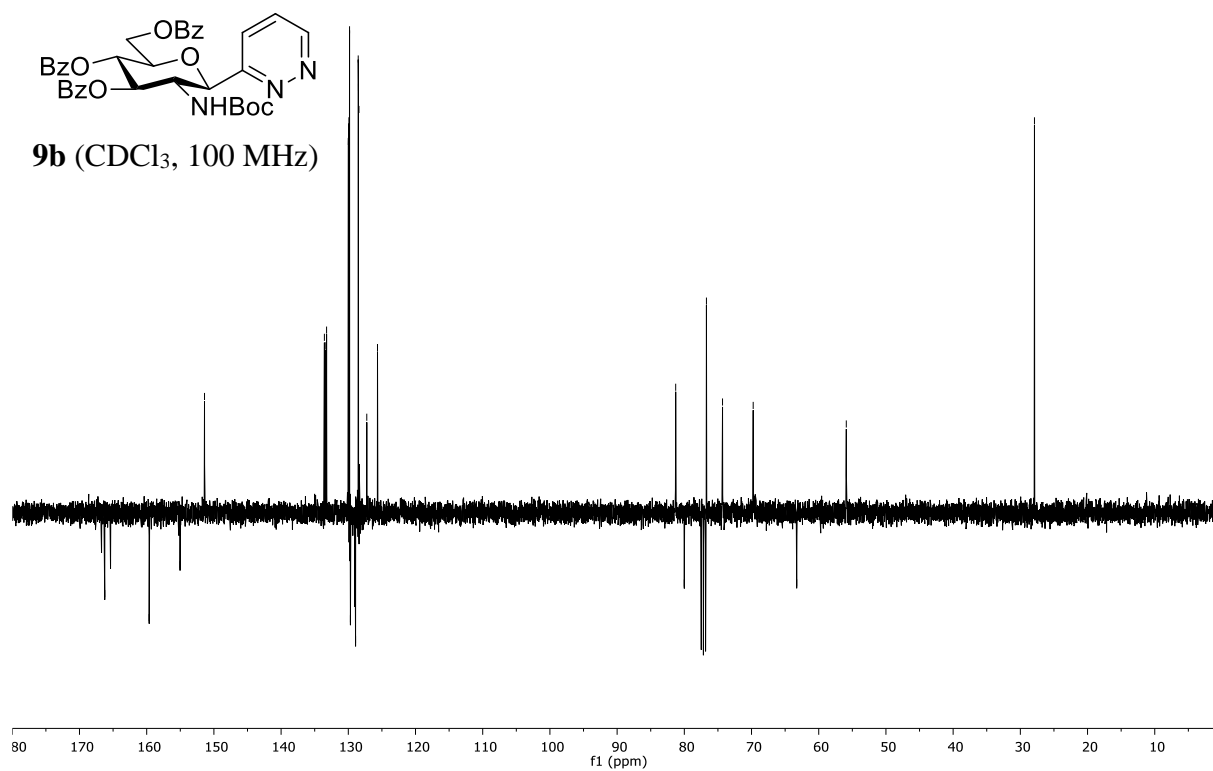

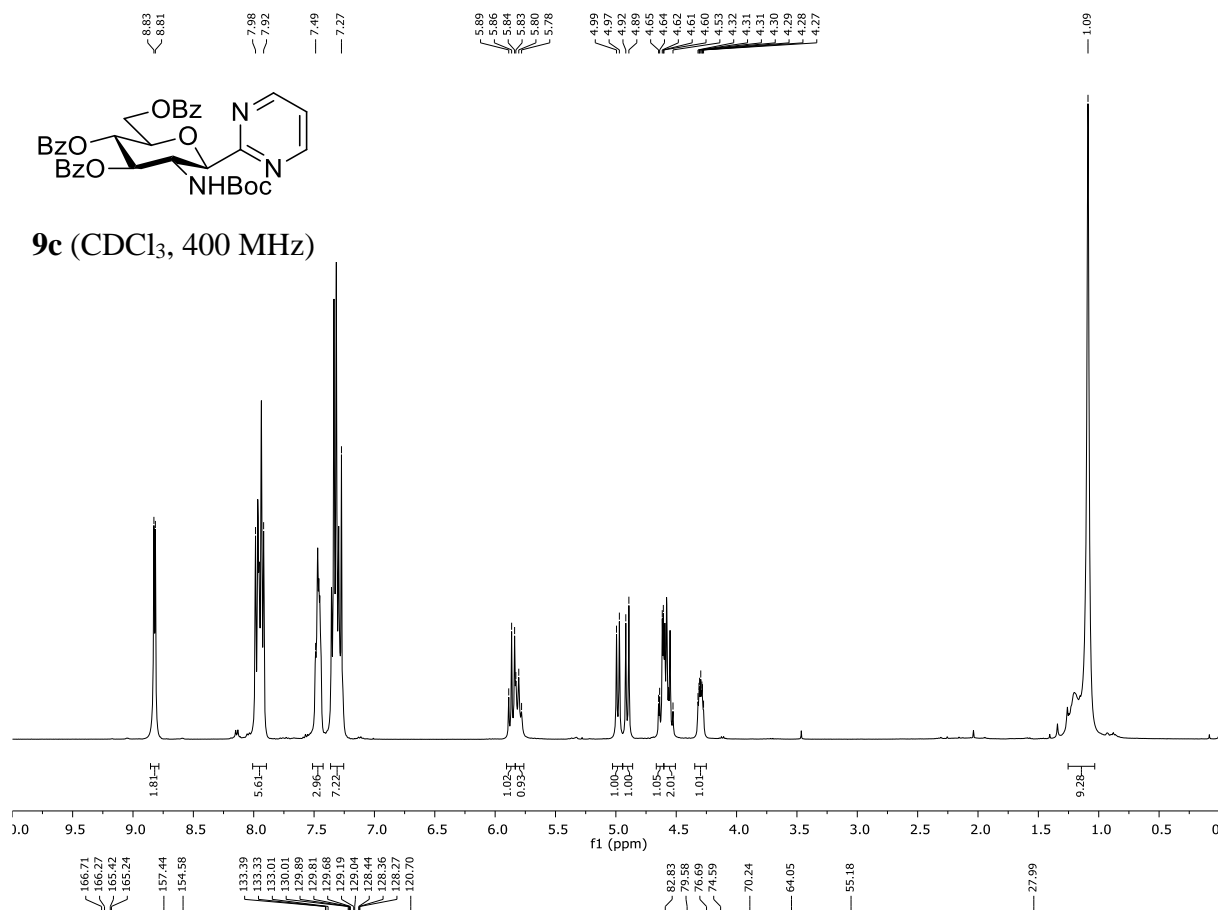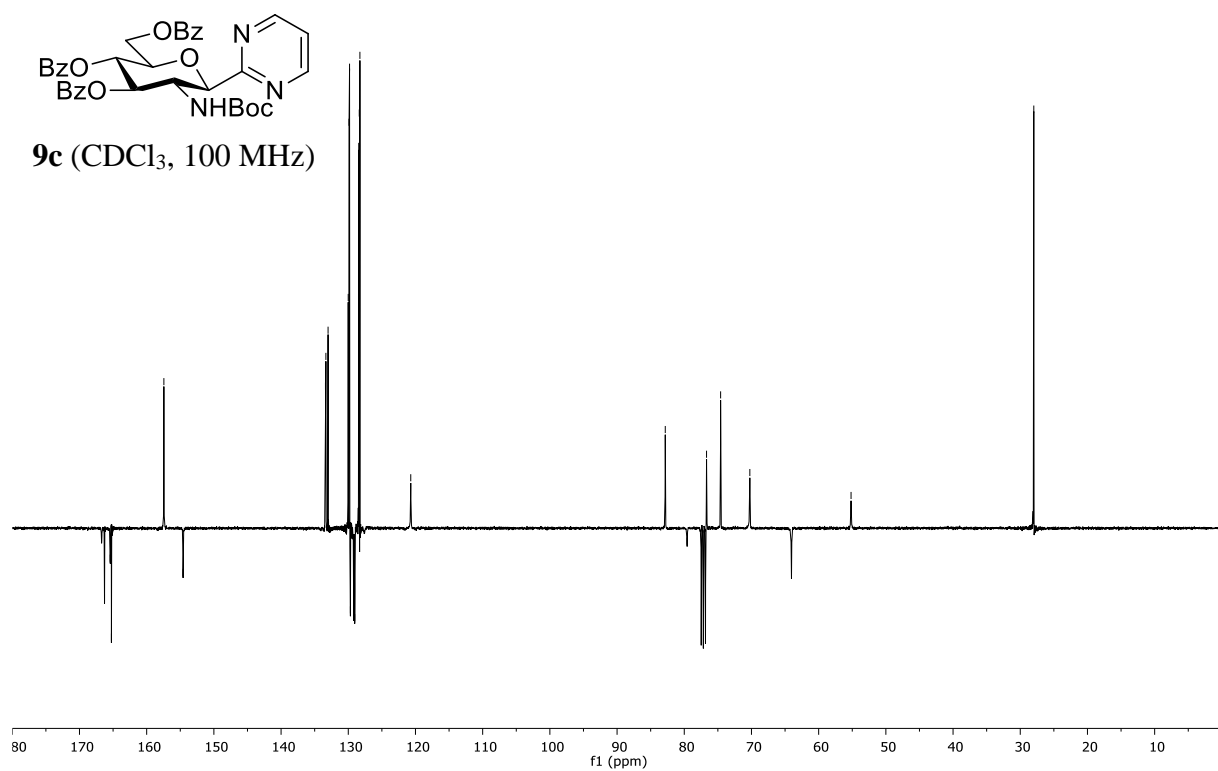

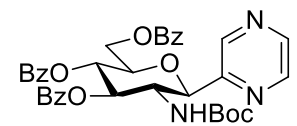

**9d** (CDCl<sub>3</sub>, 400 MHz)

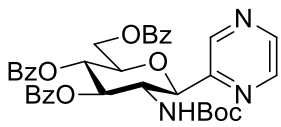

**9d** (CDCl<sub>3</sub>, 90 MHz)

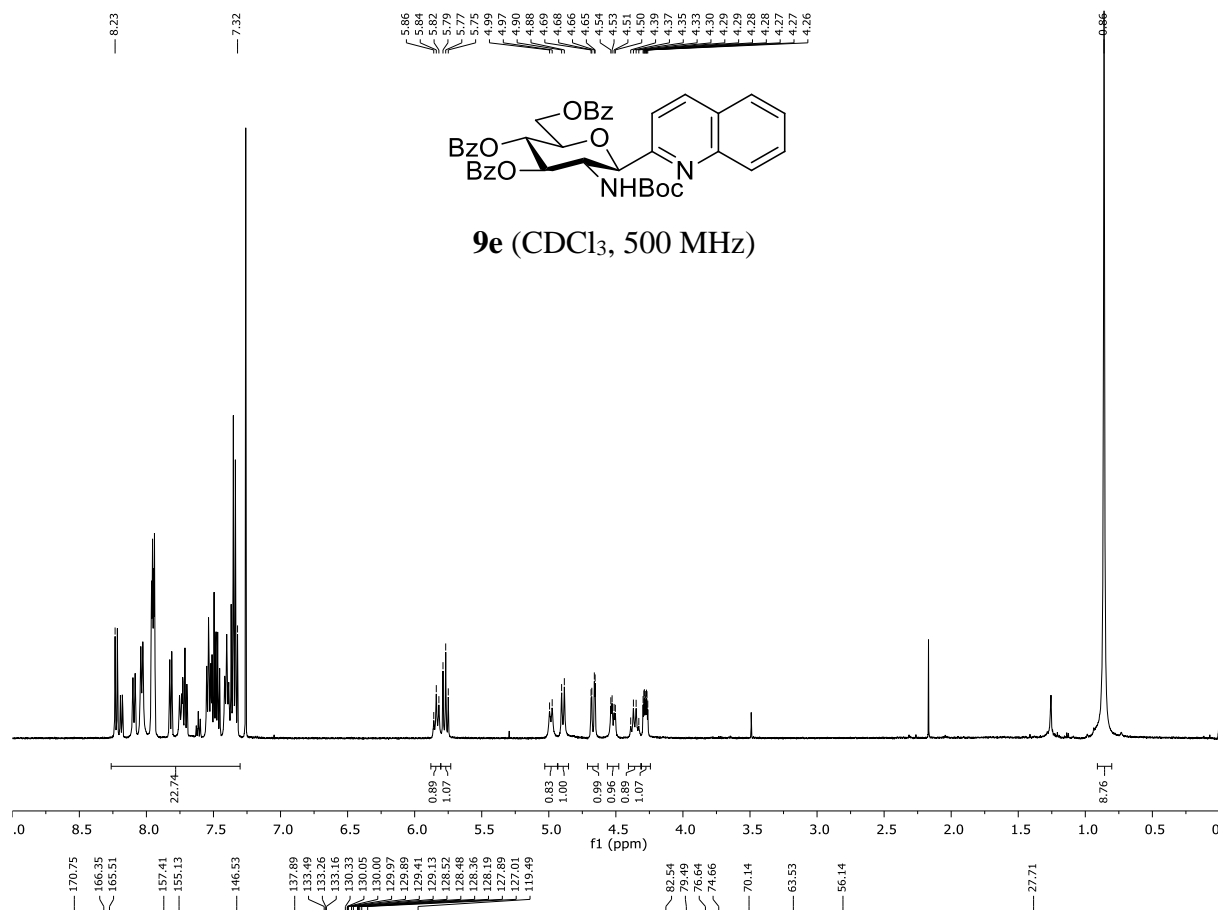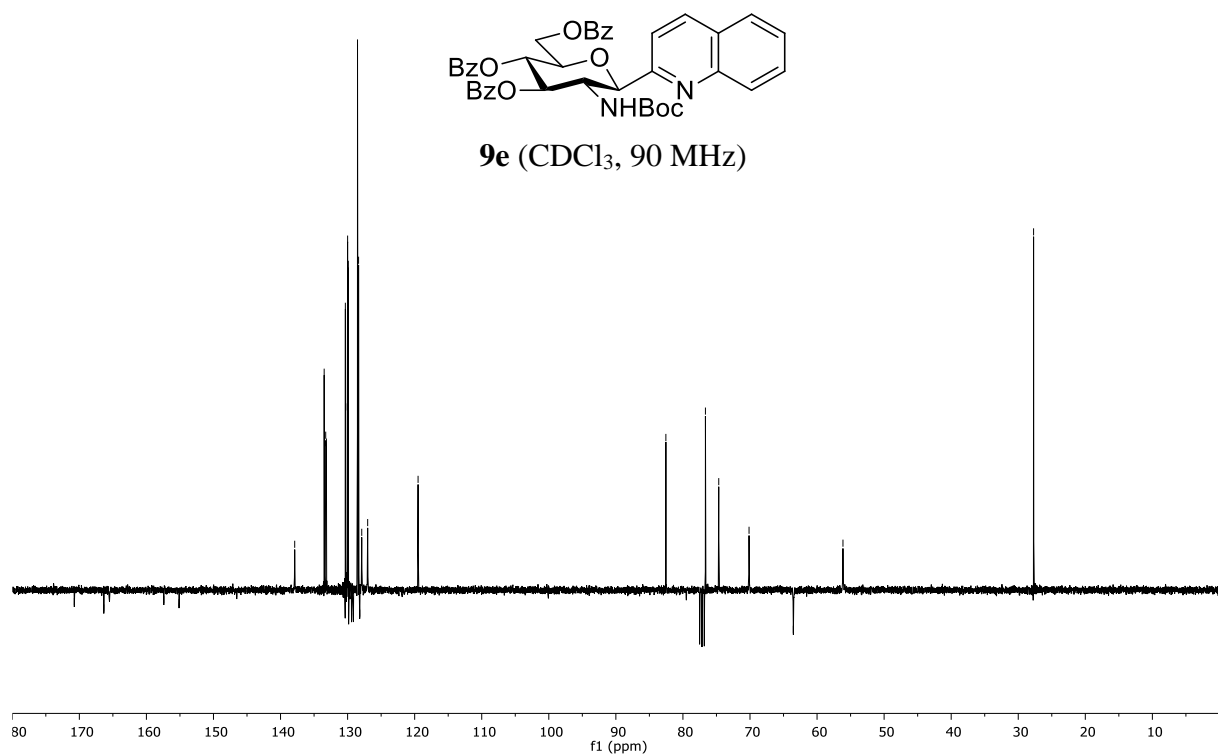

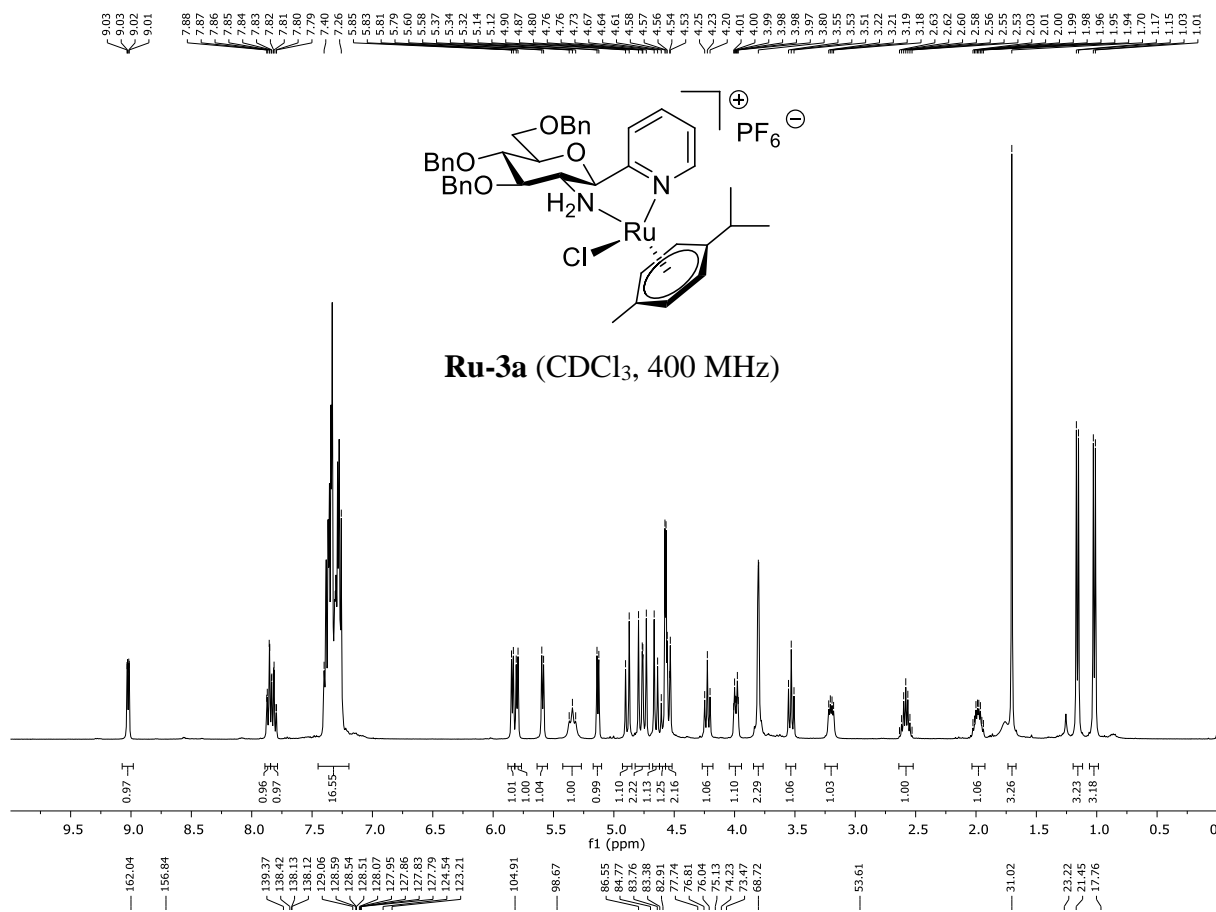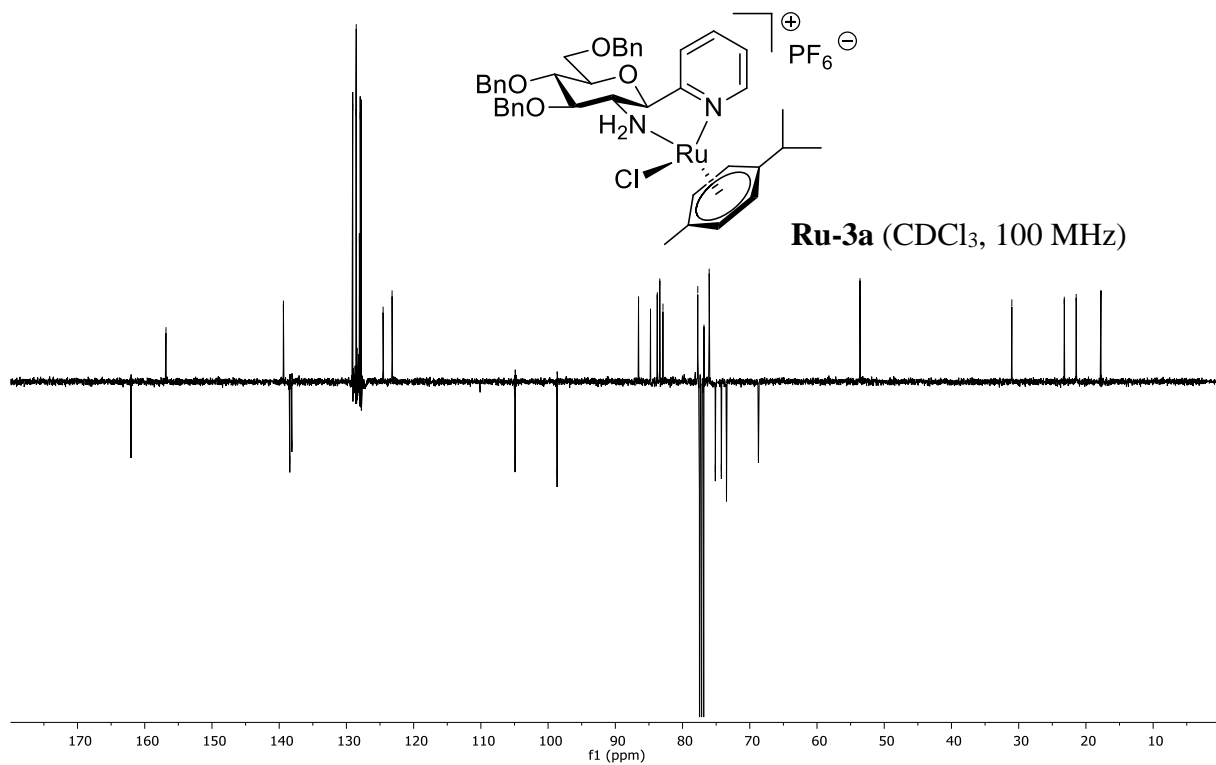



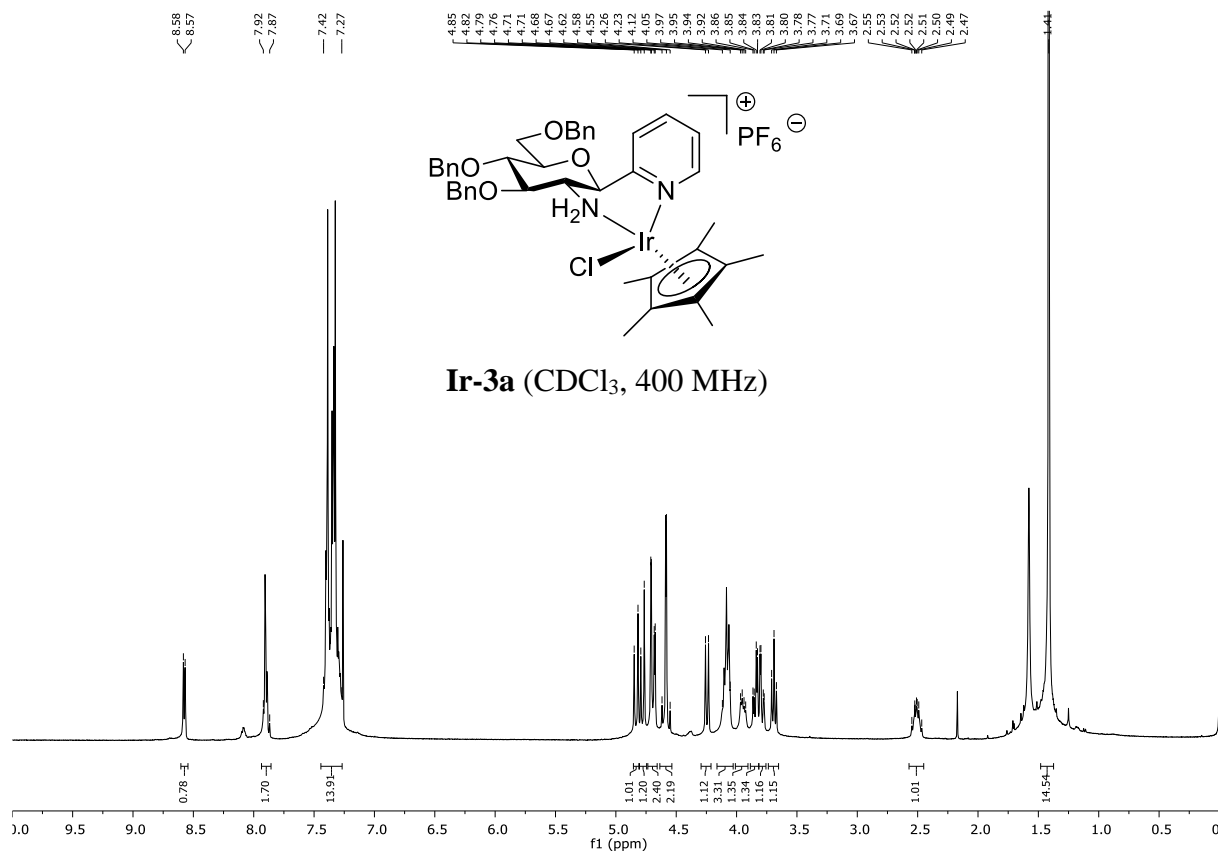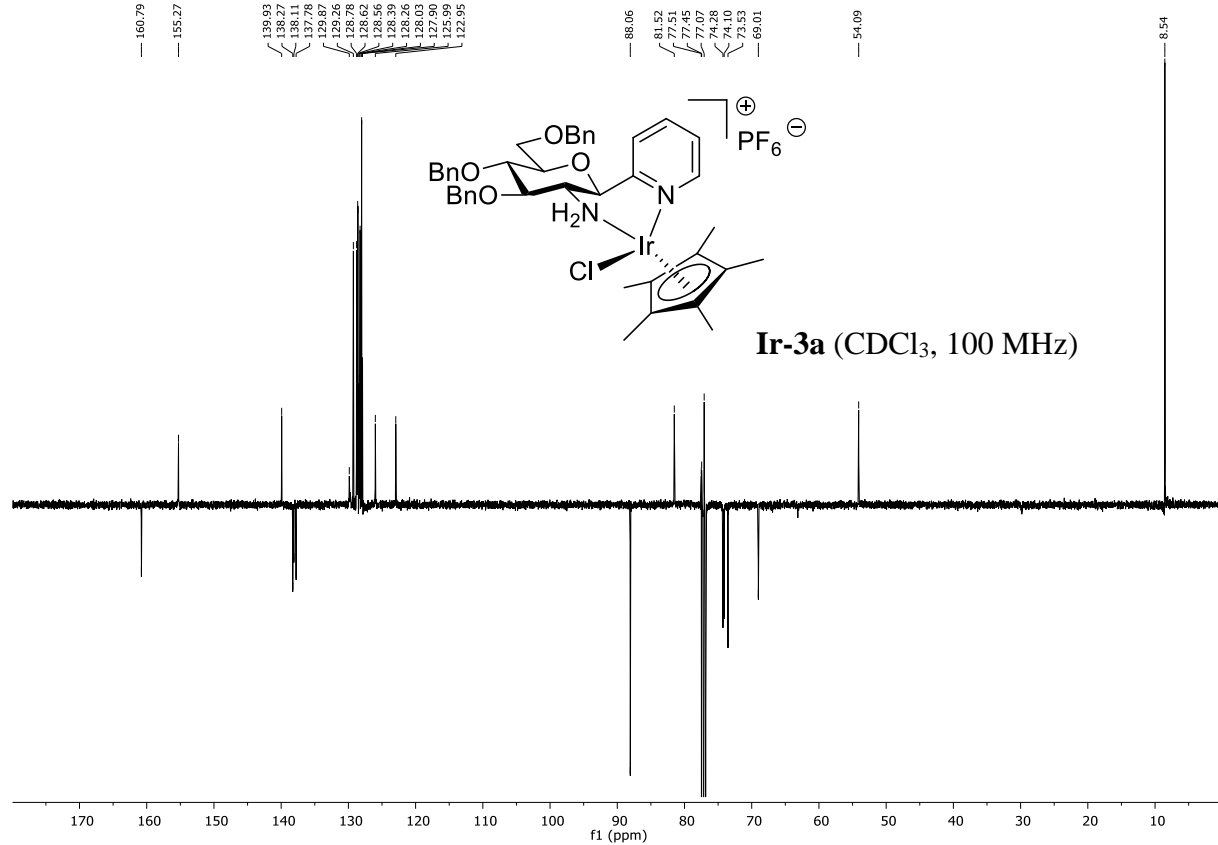

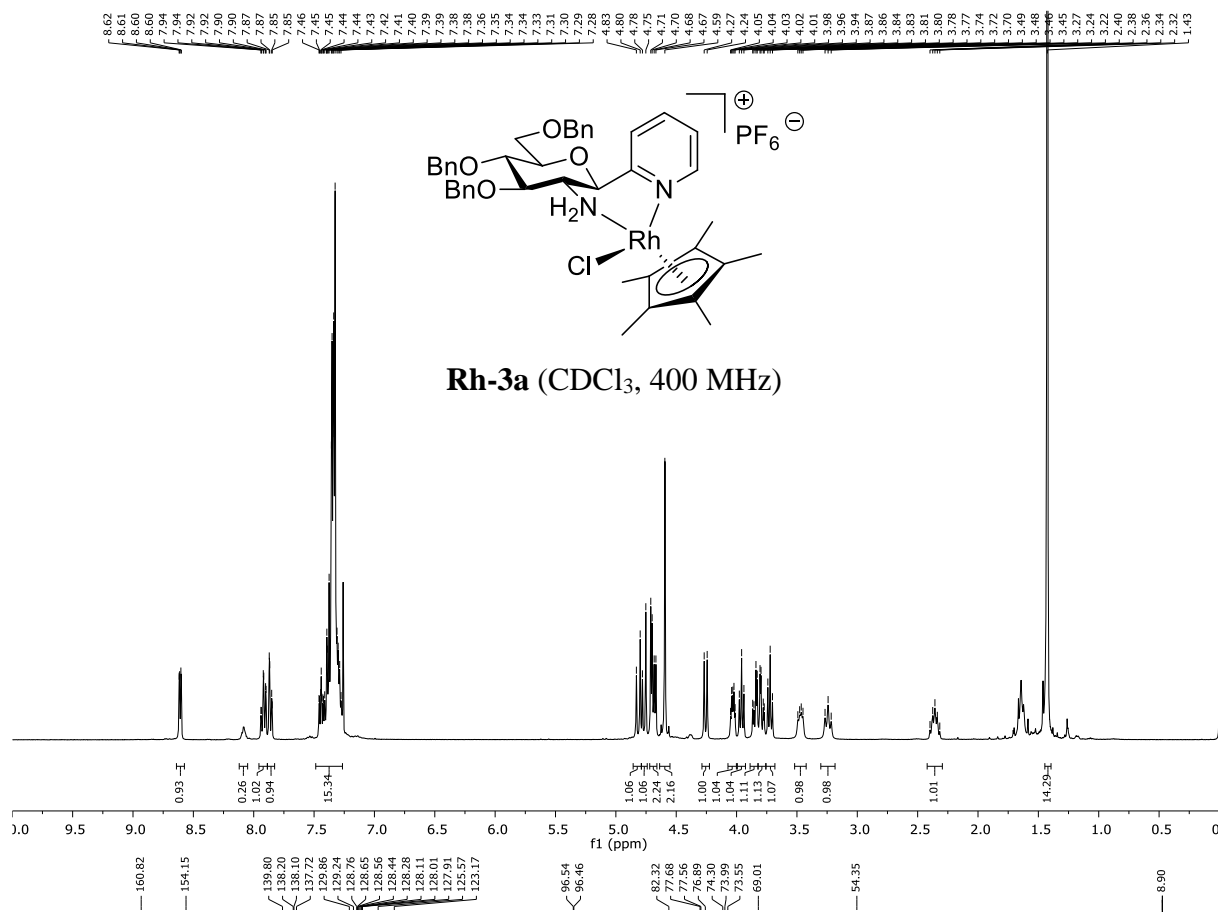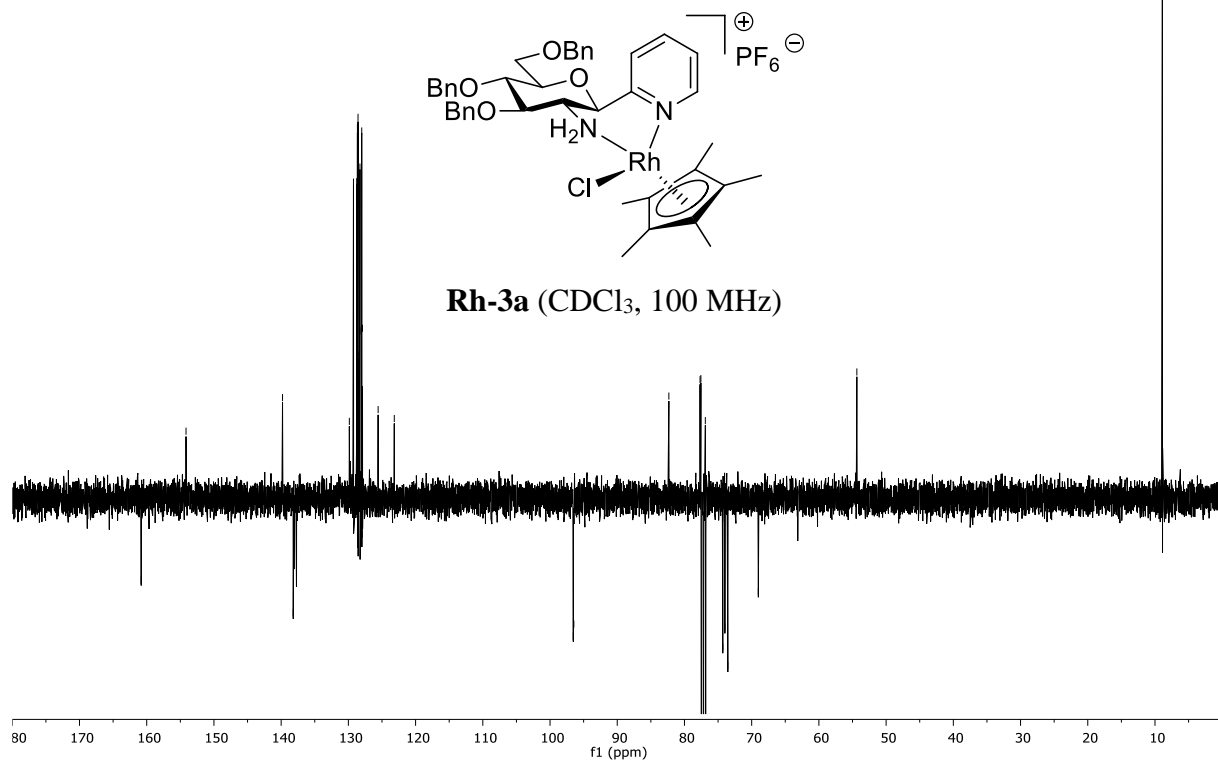

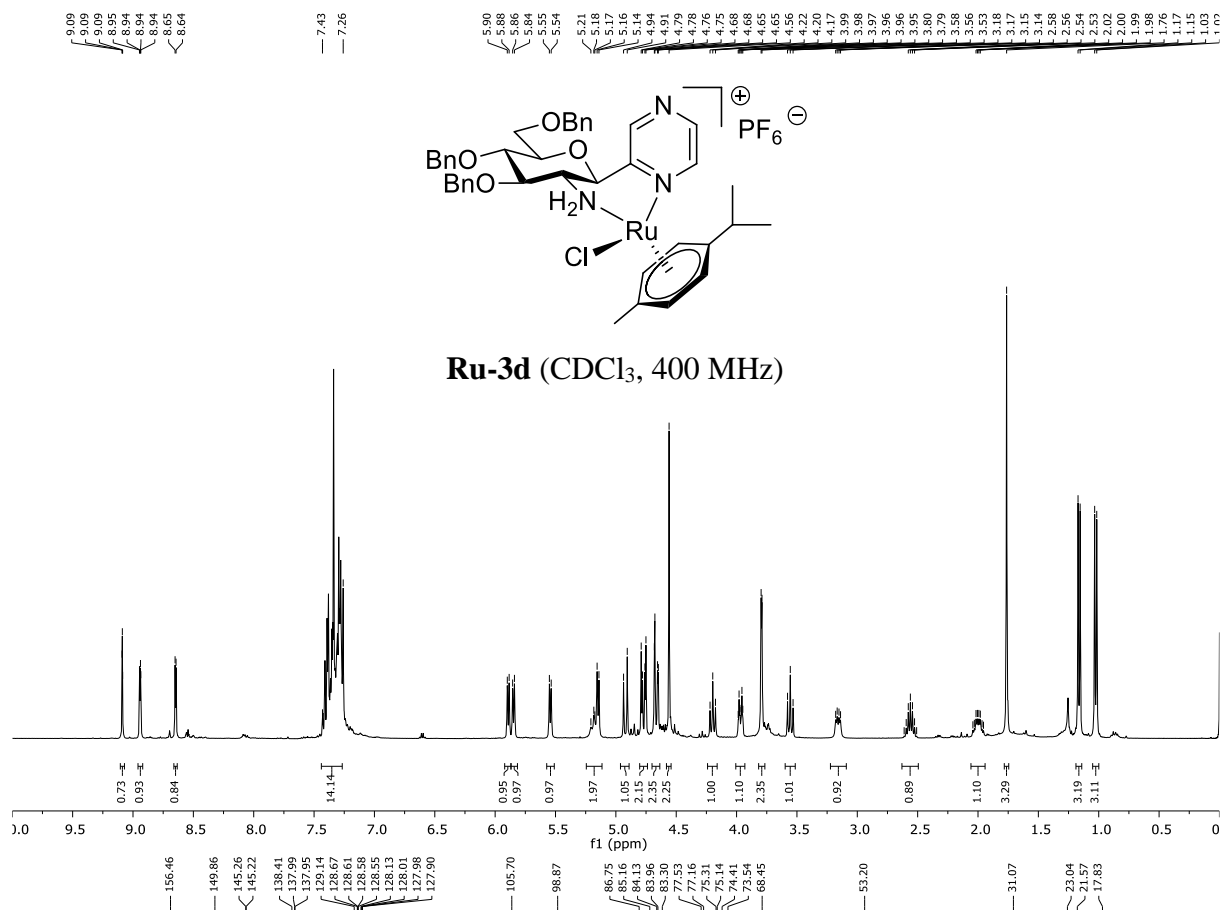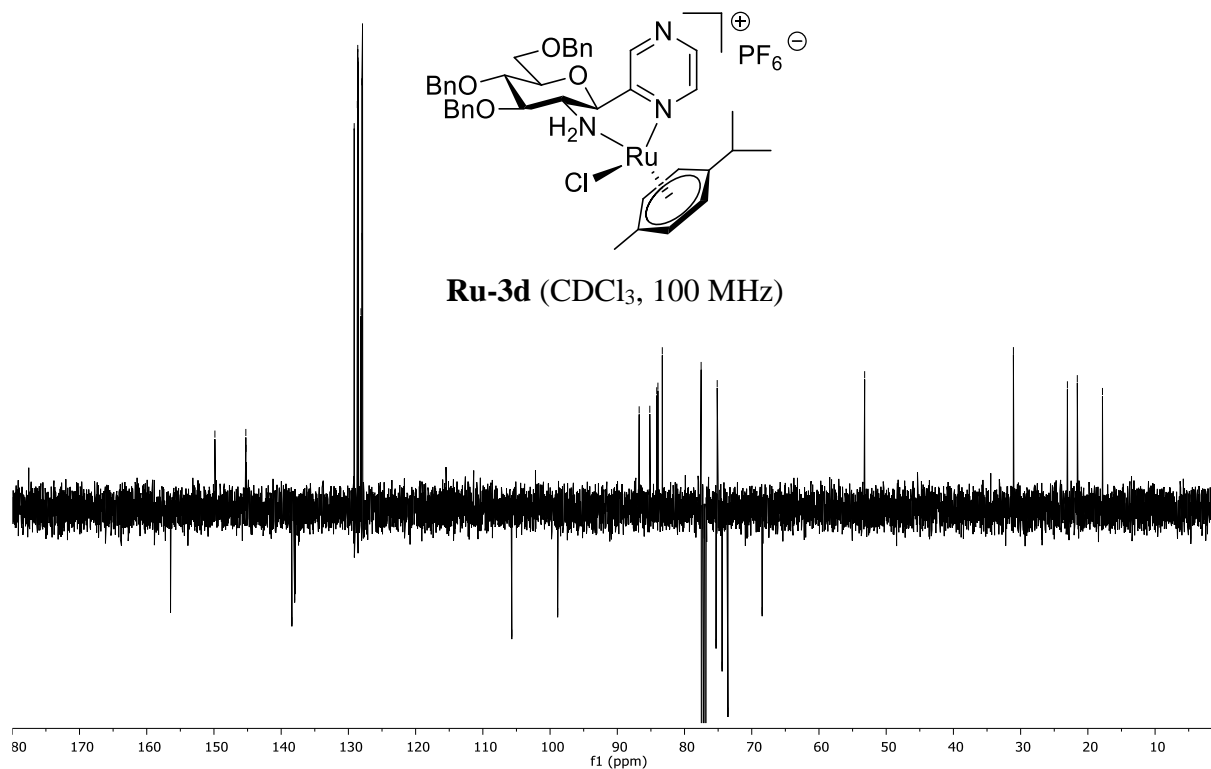

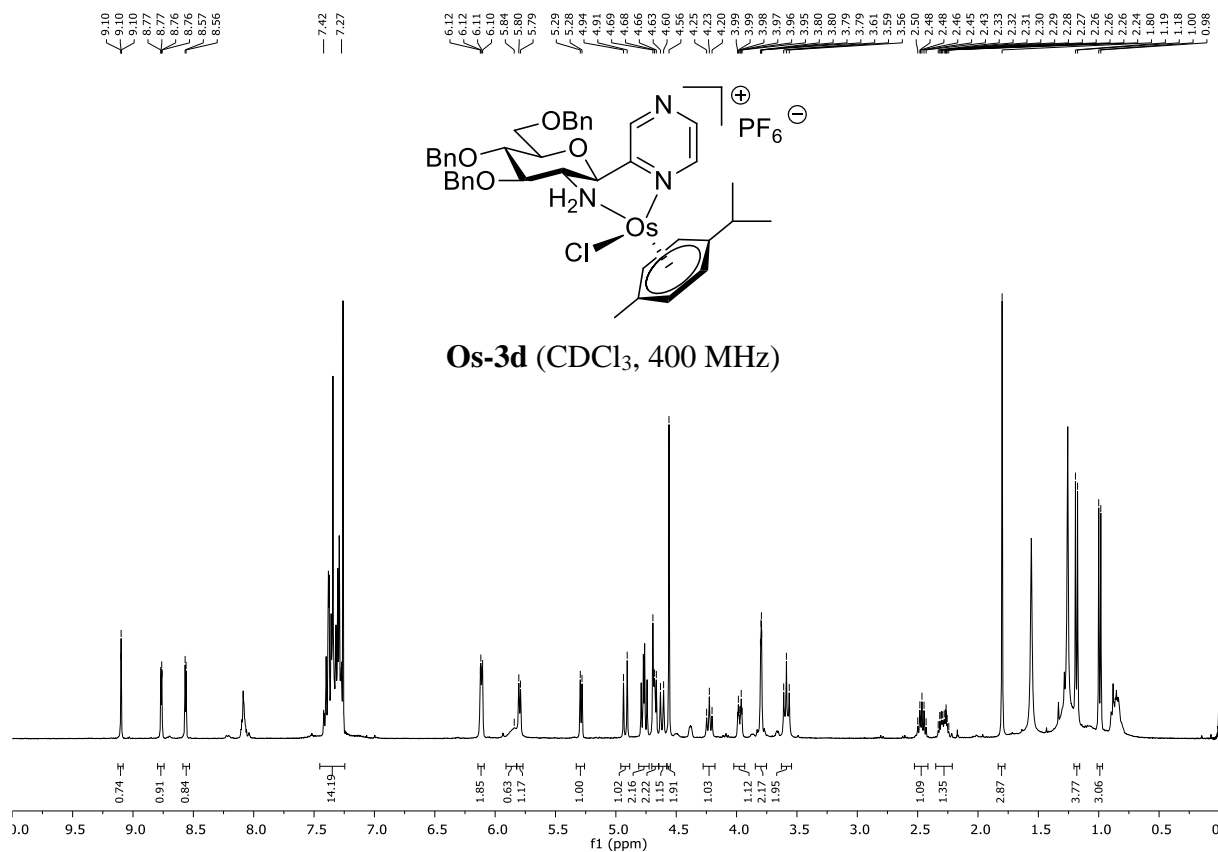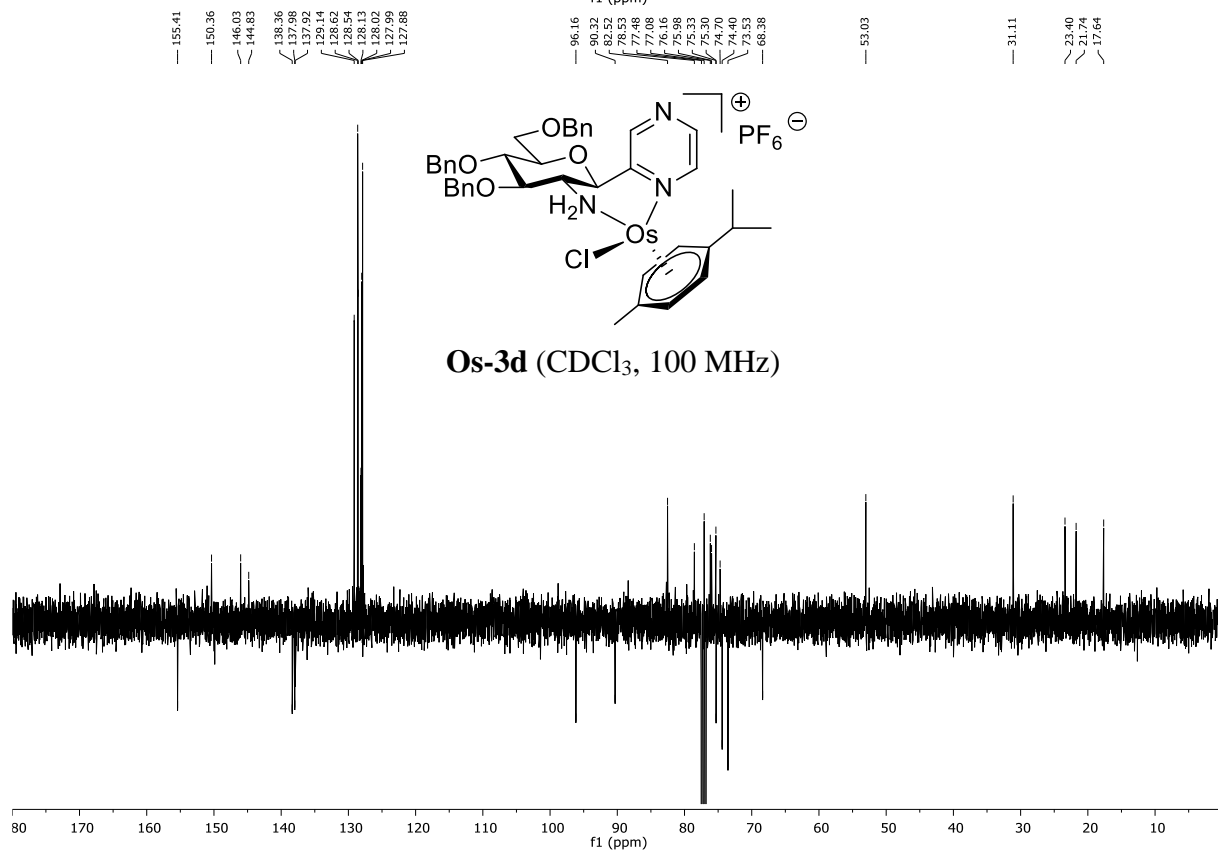

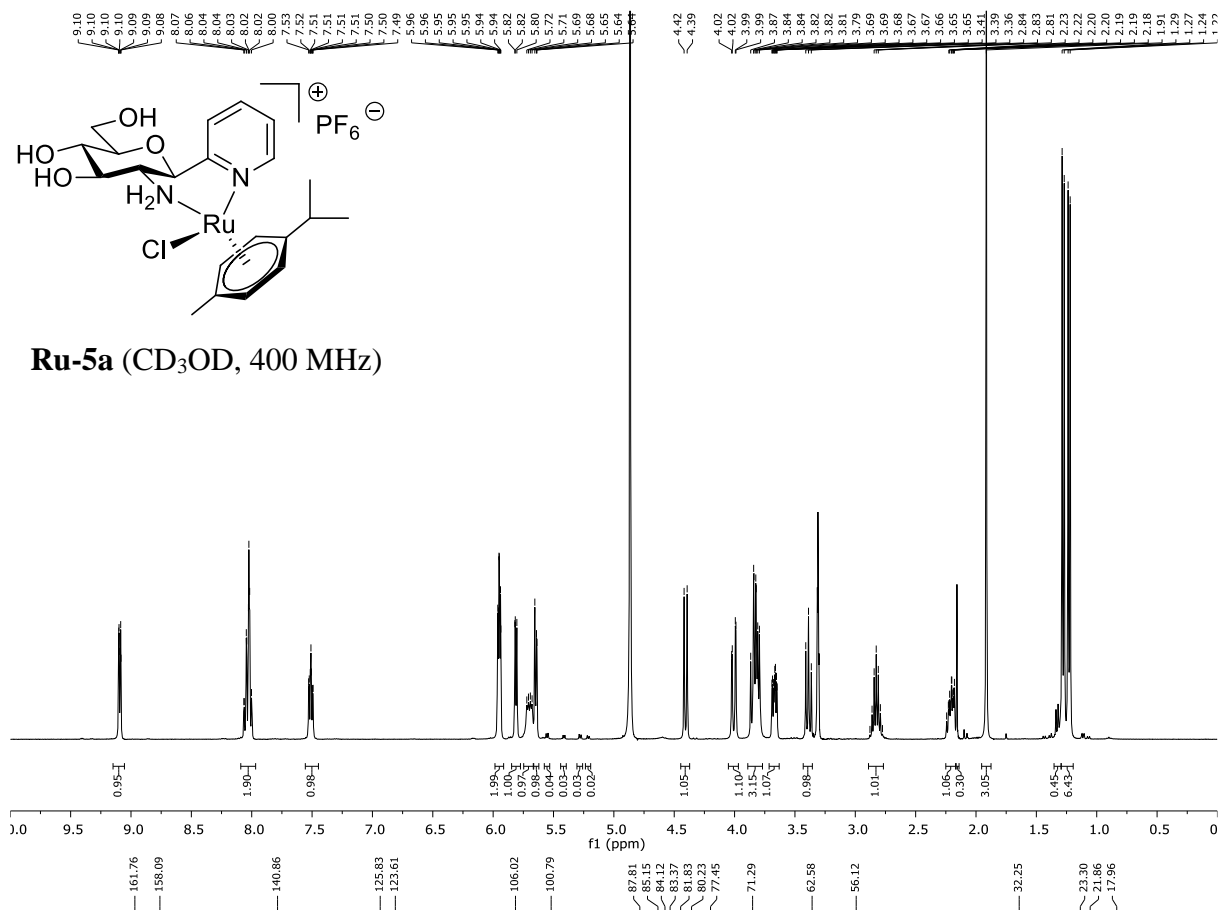

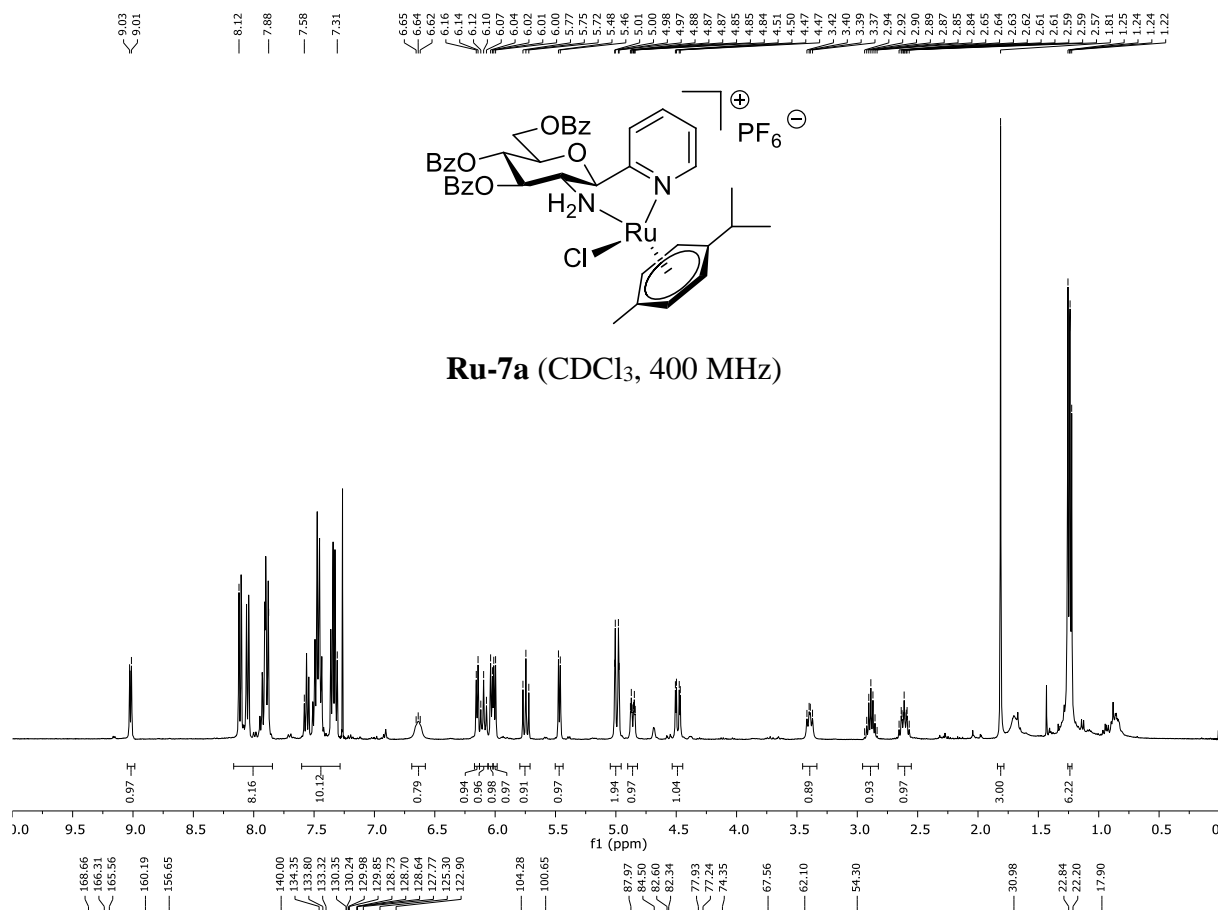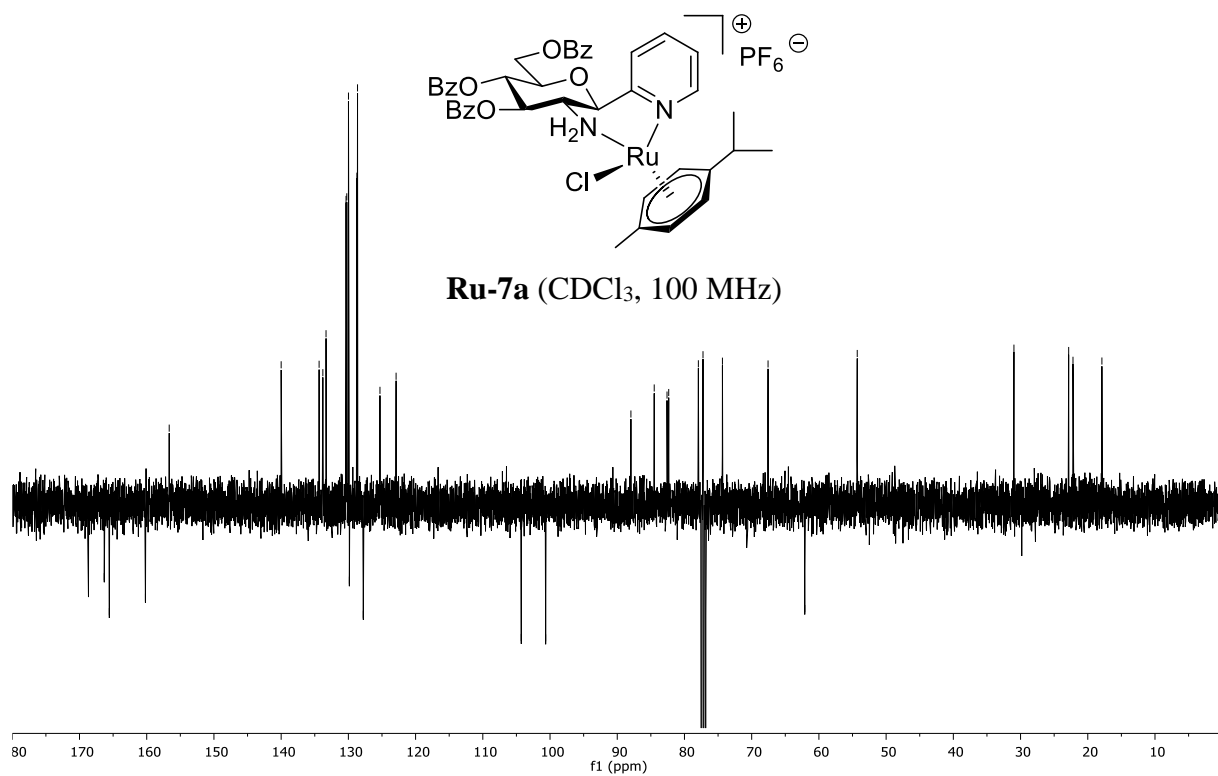

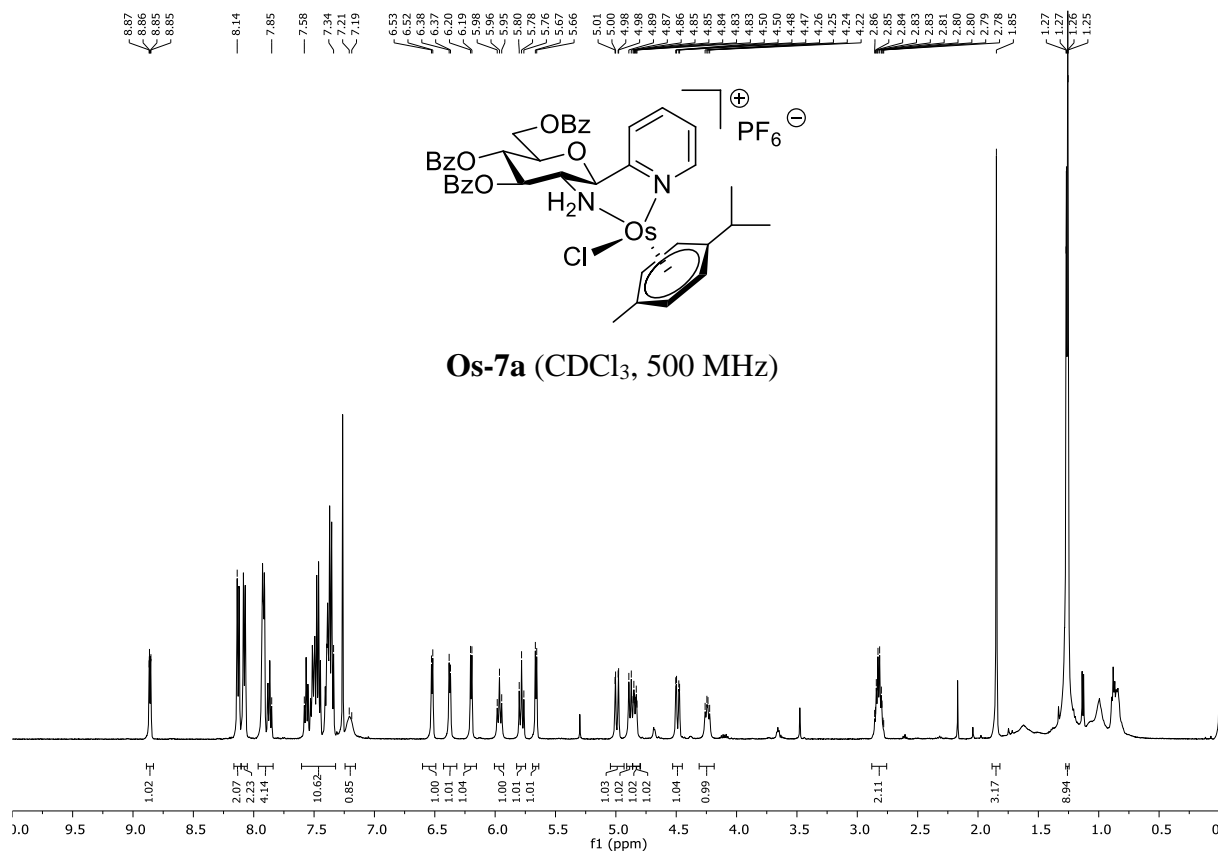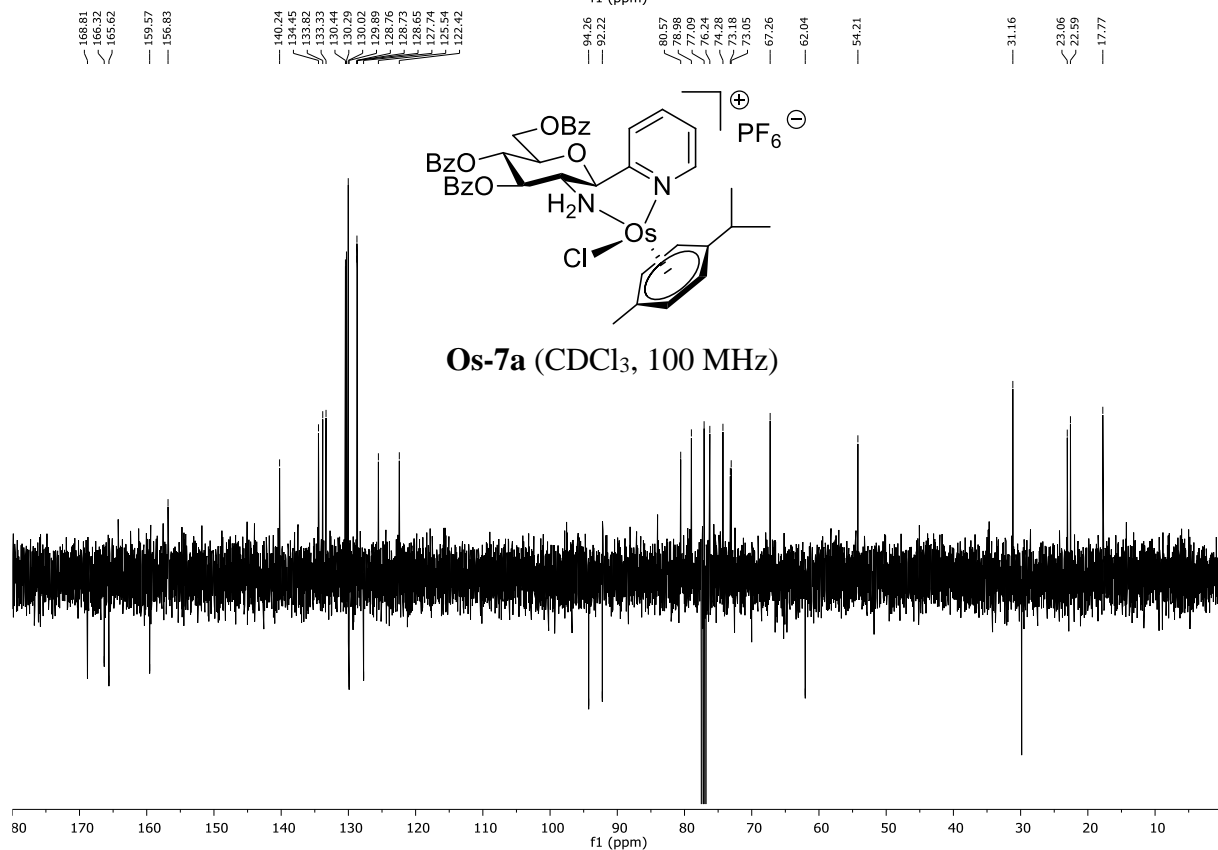

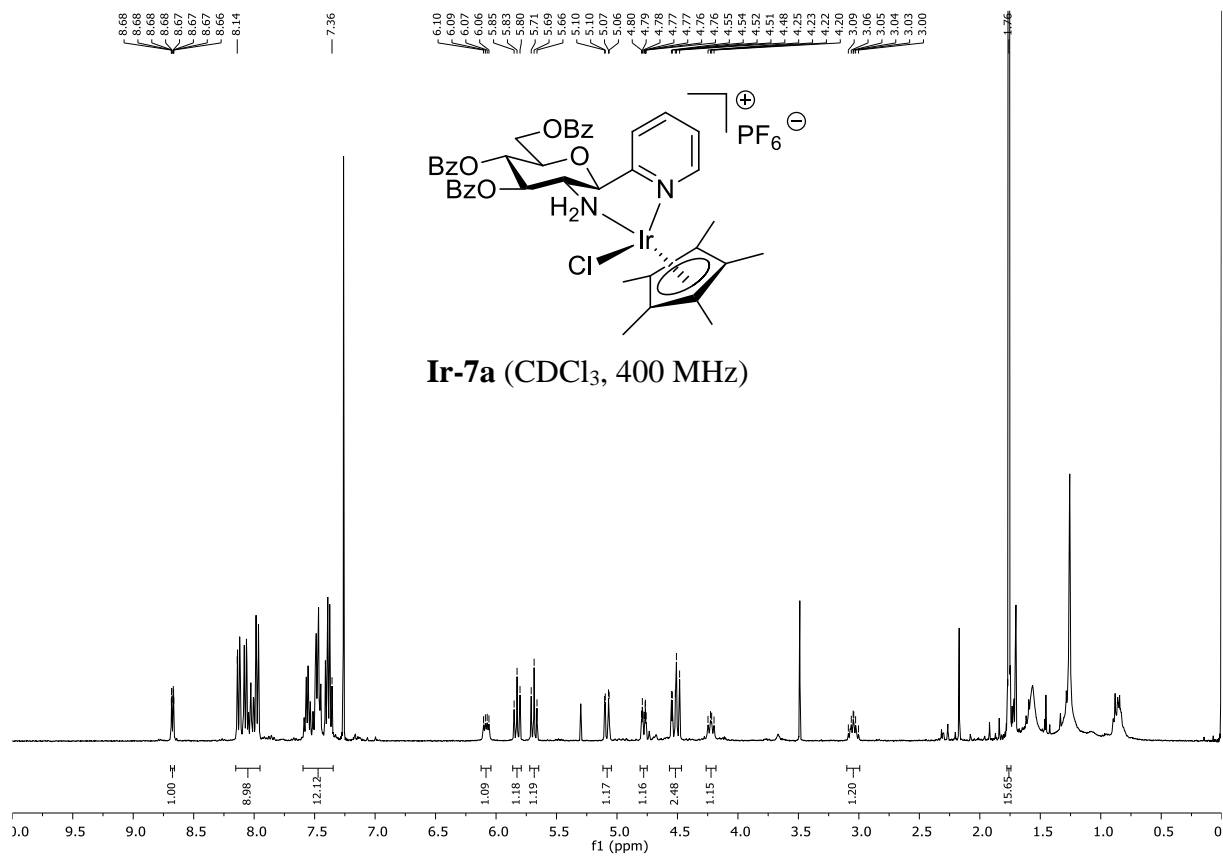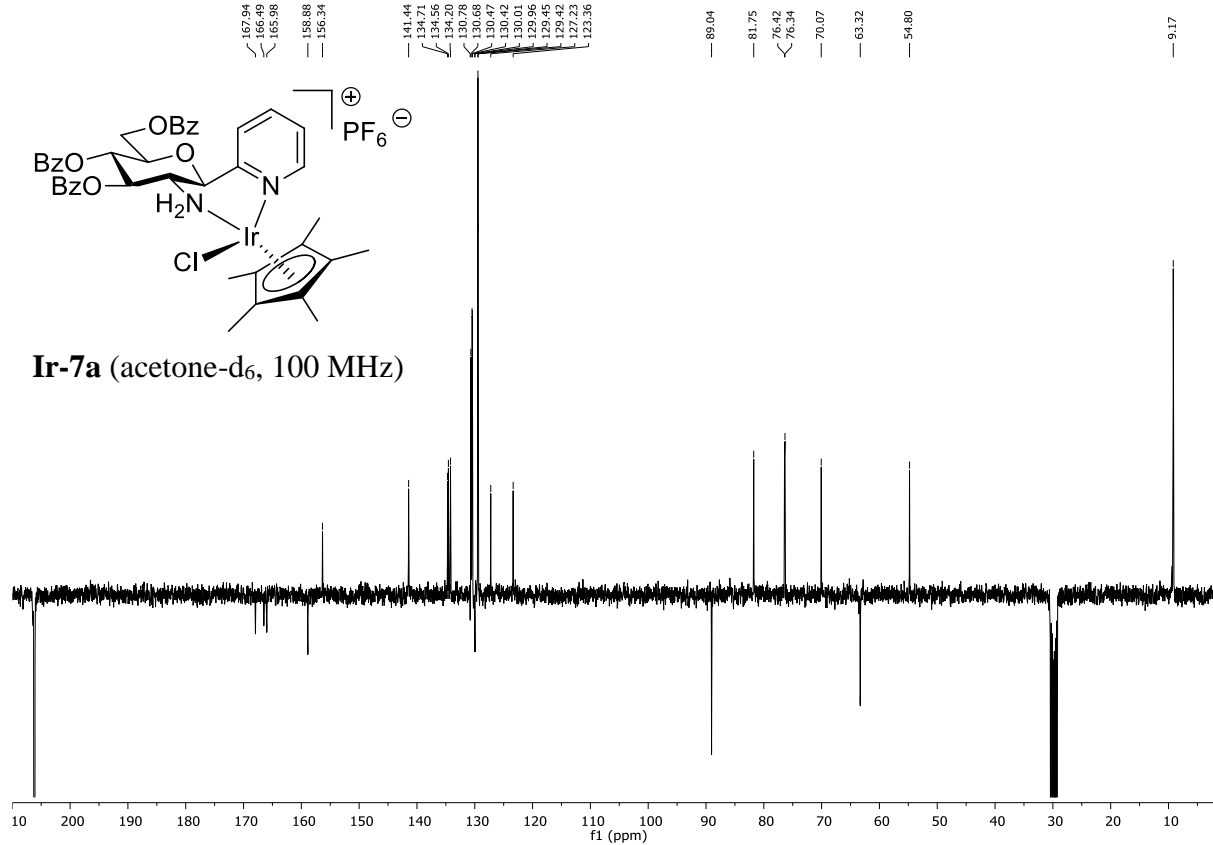

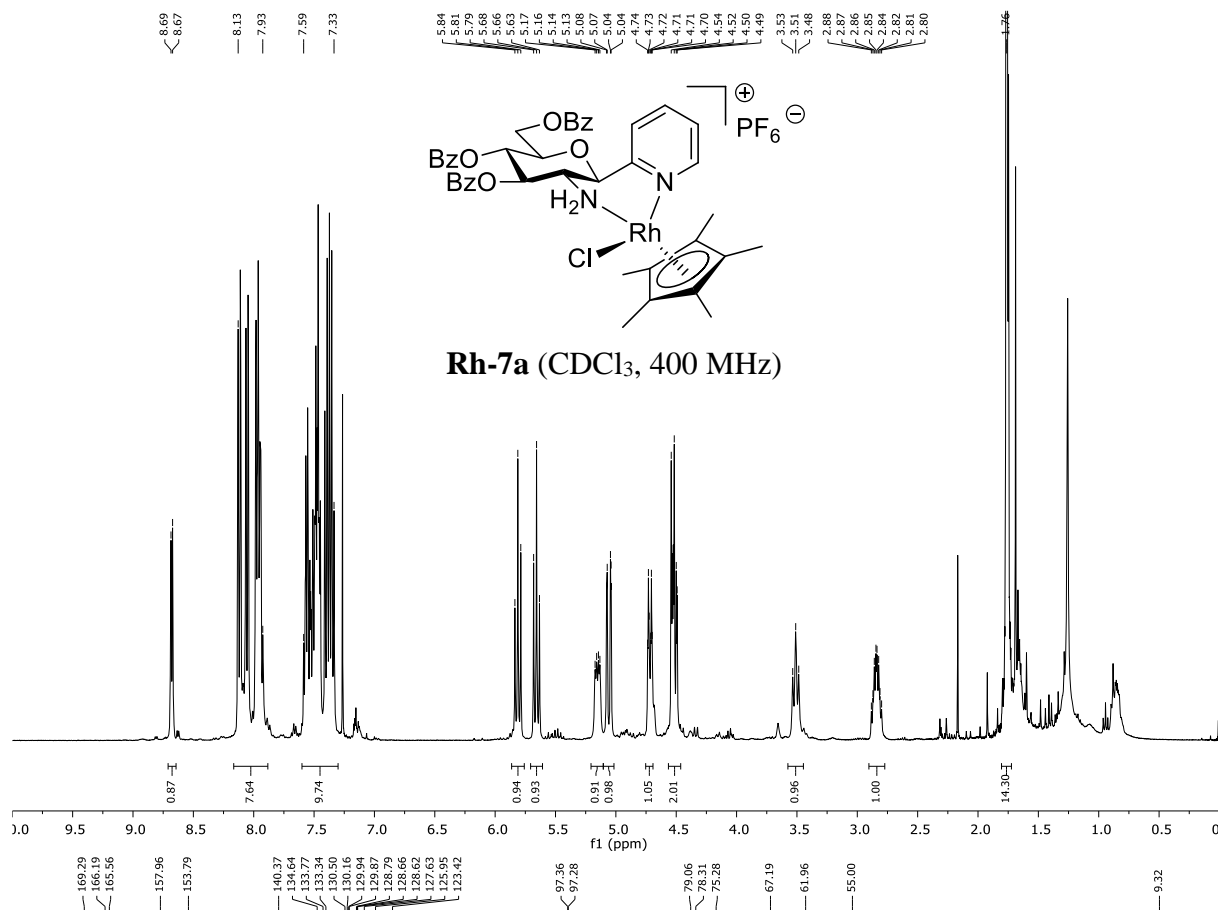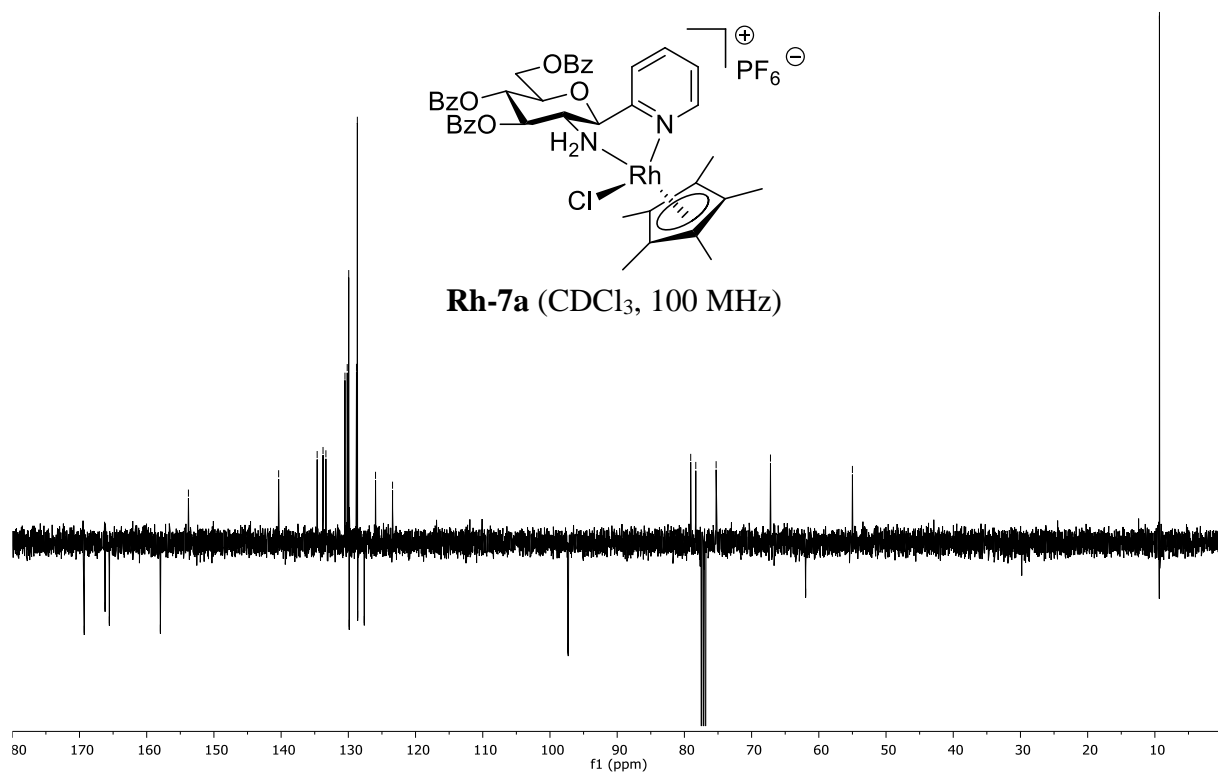

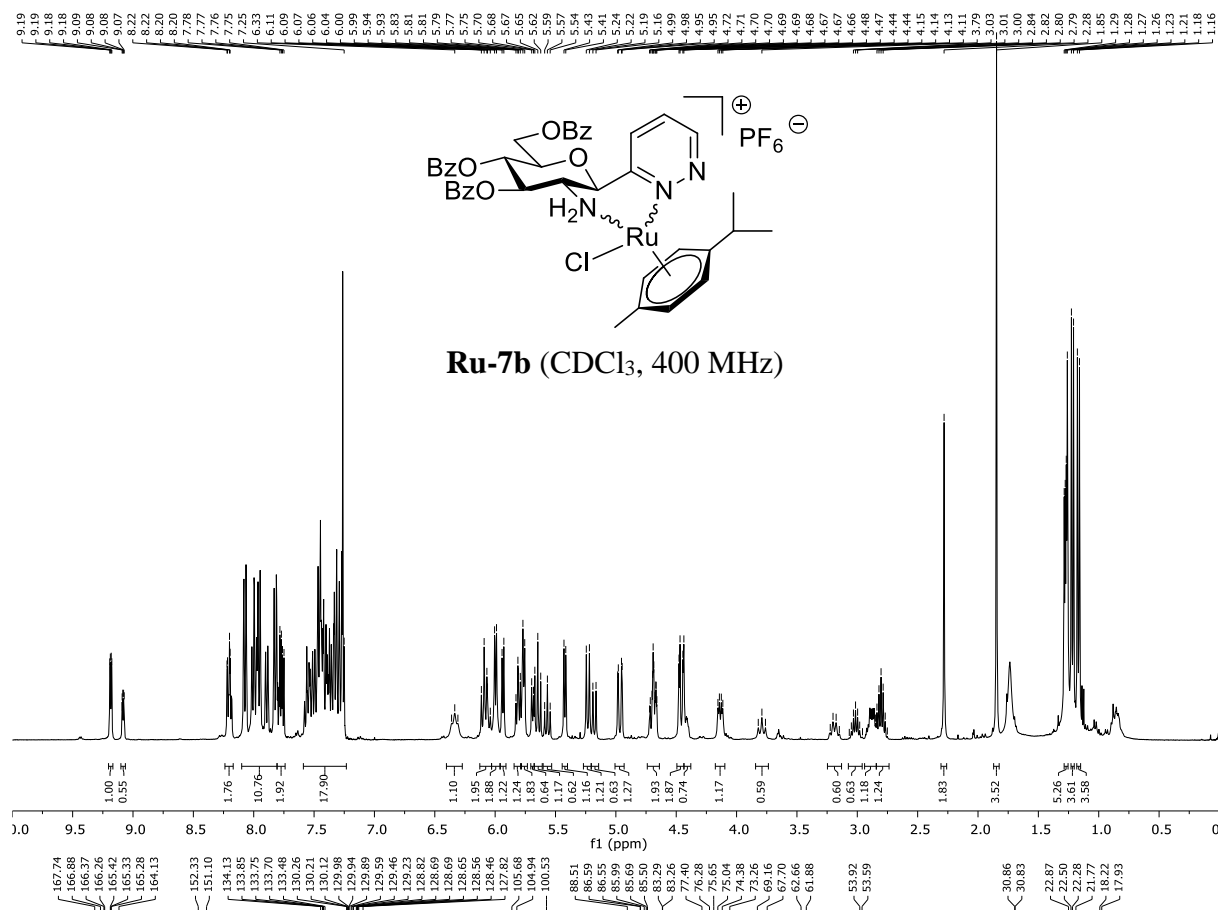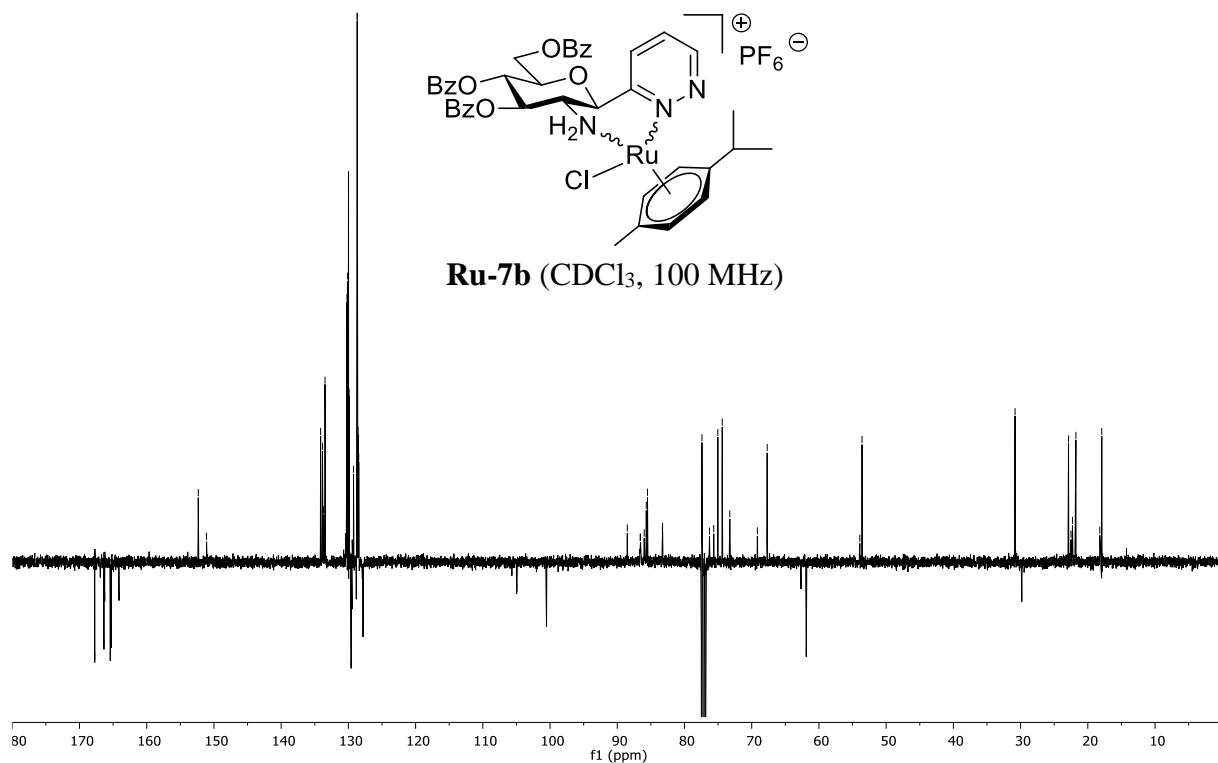

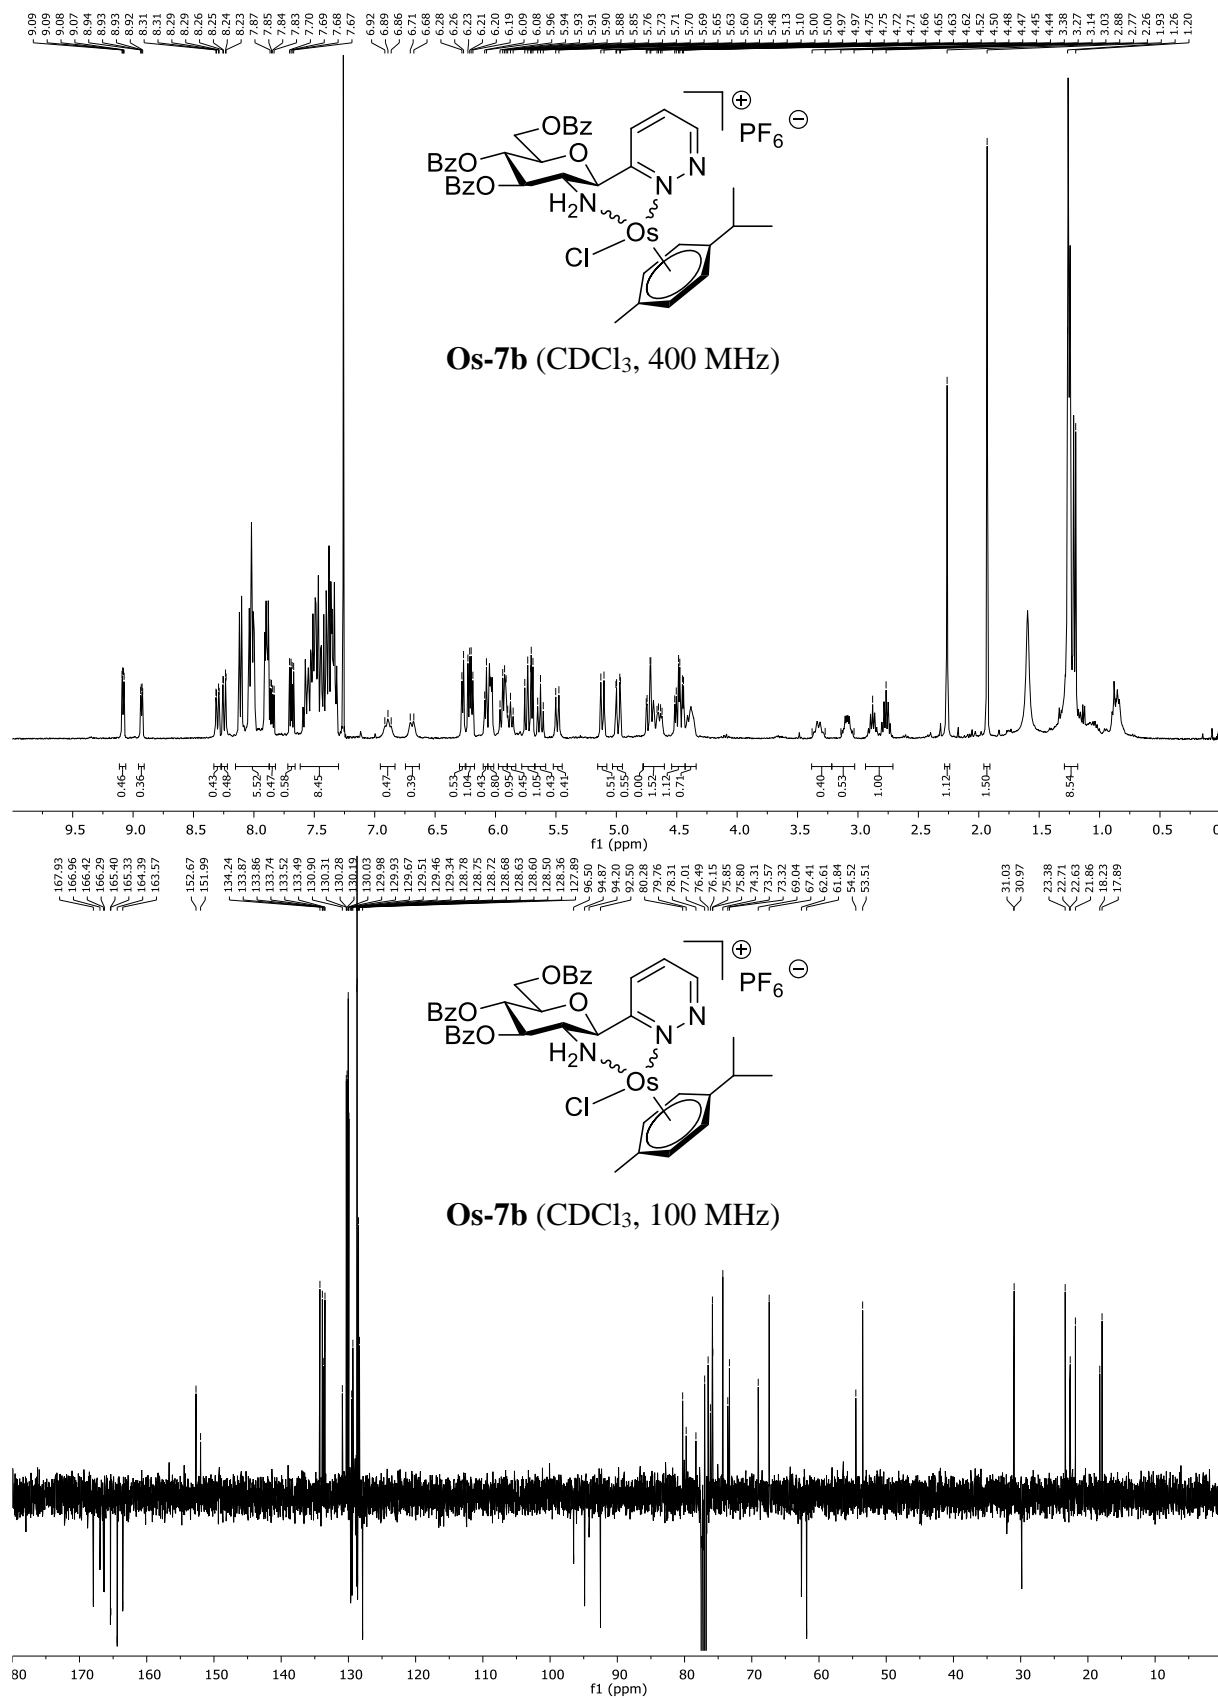

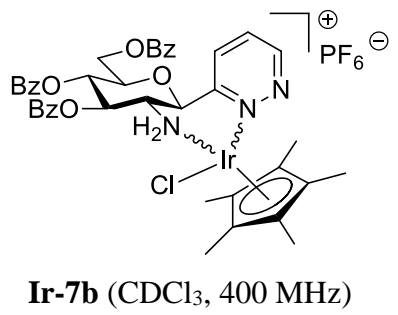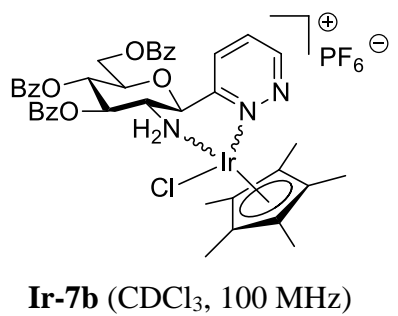

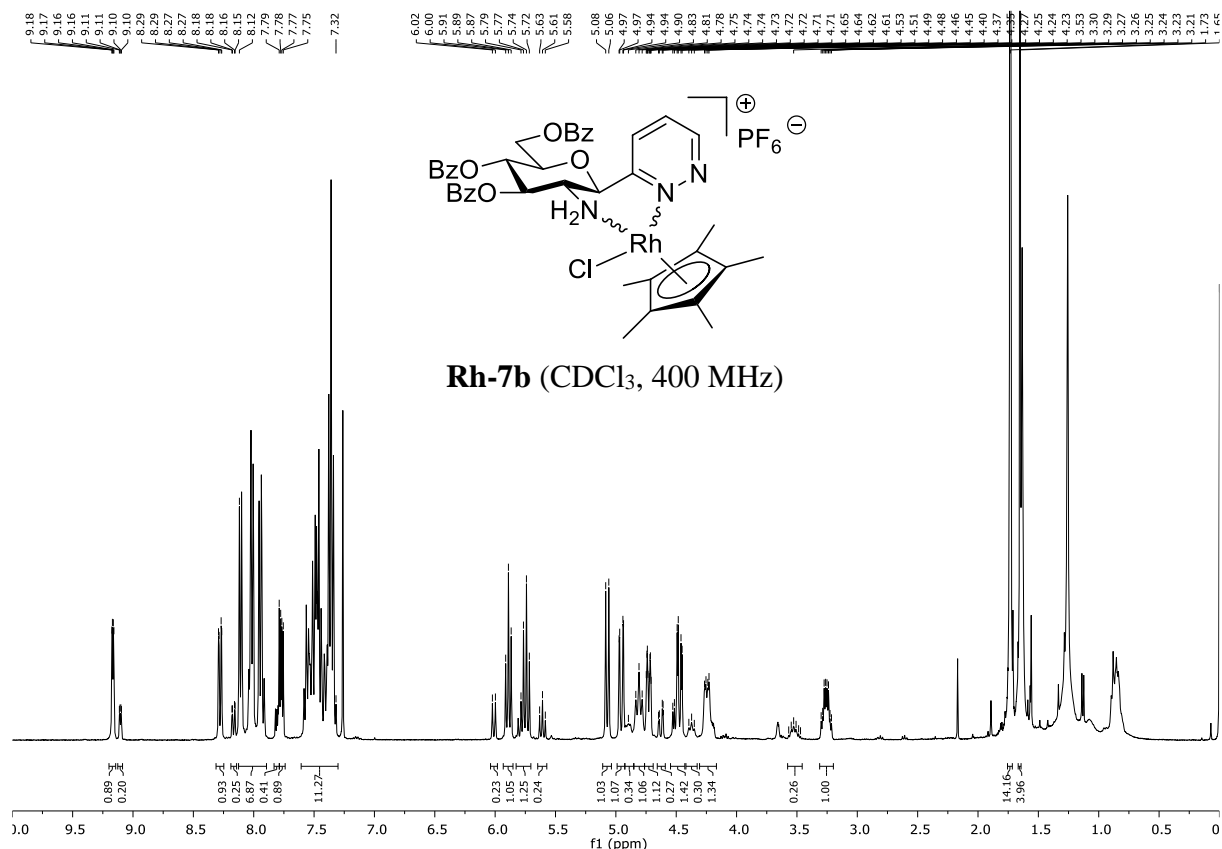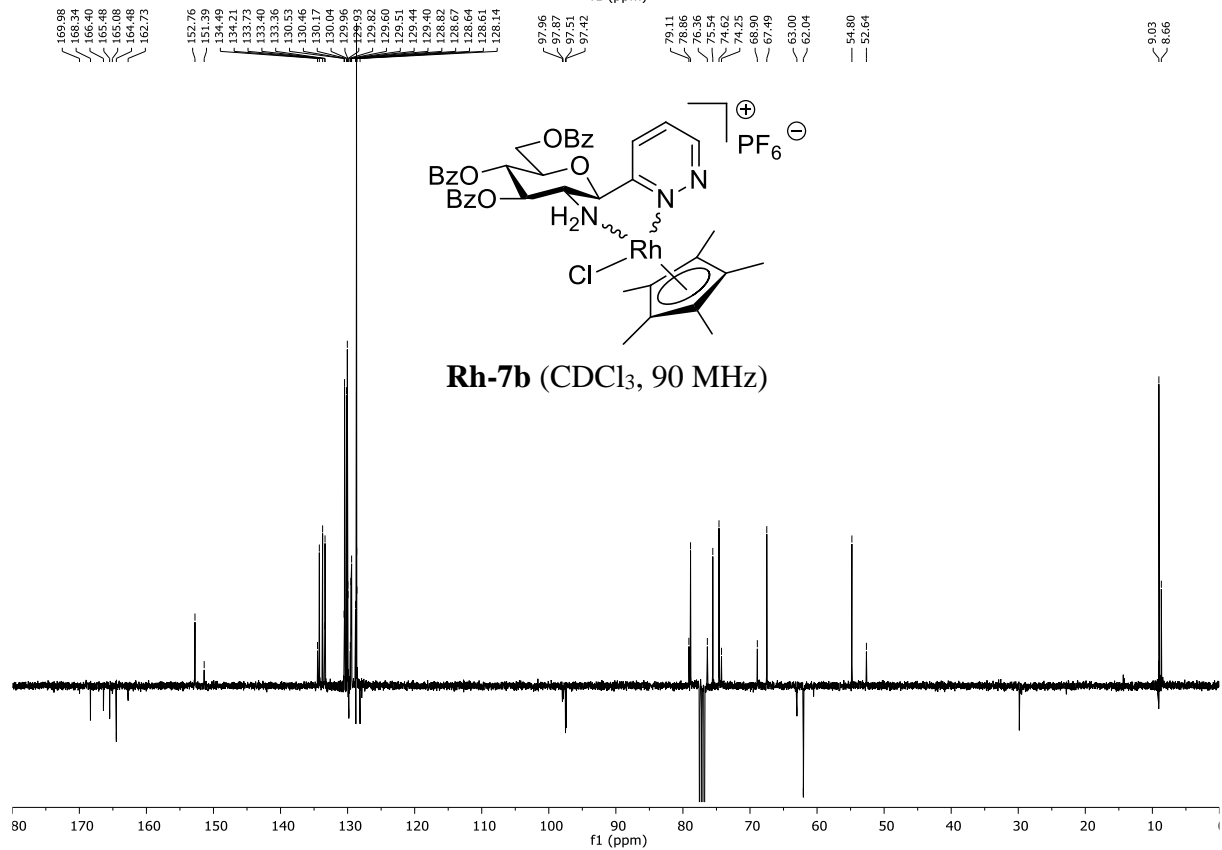

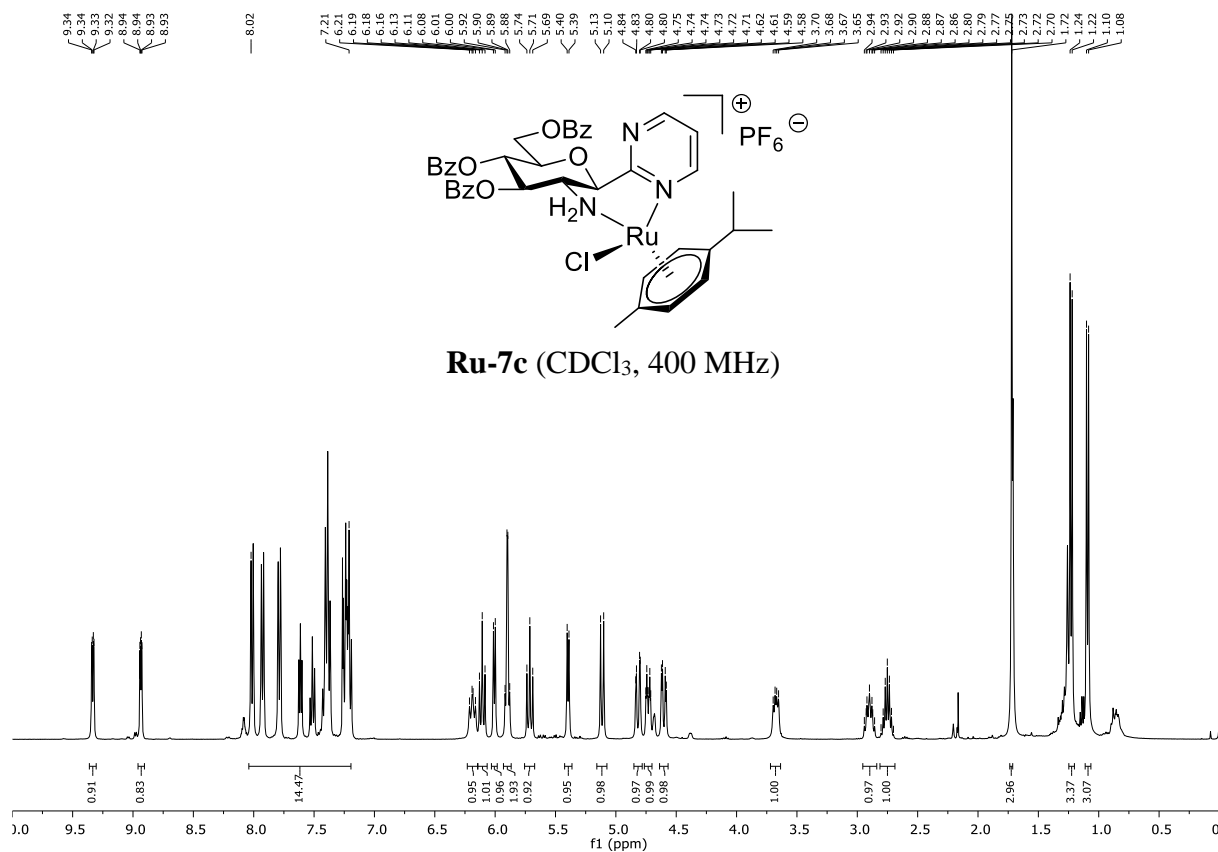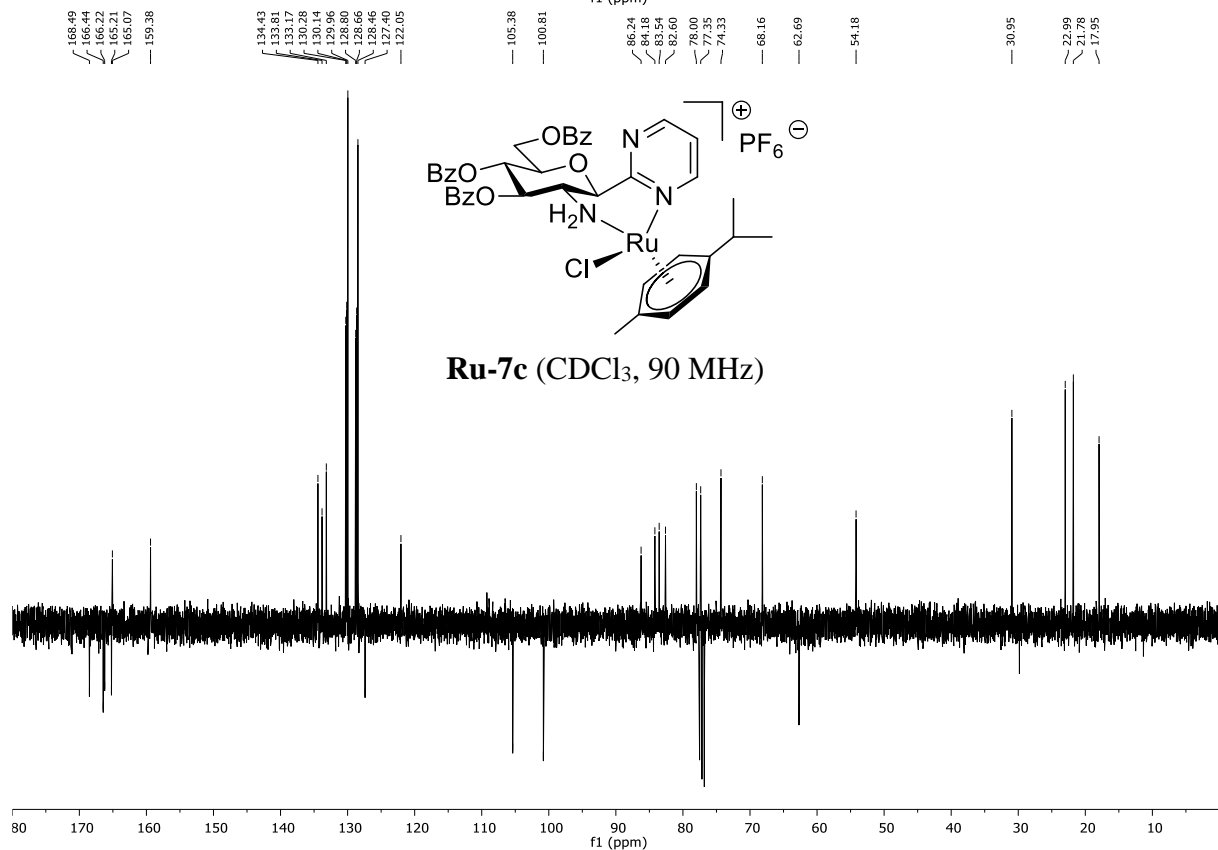

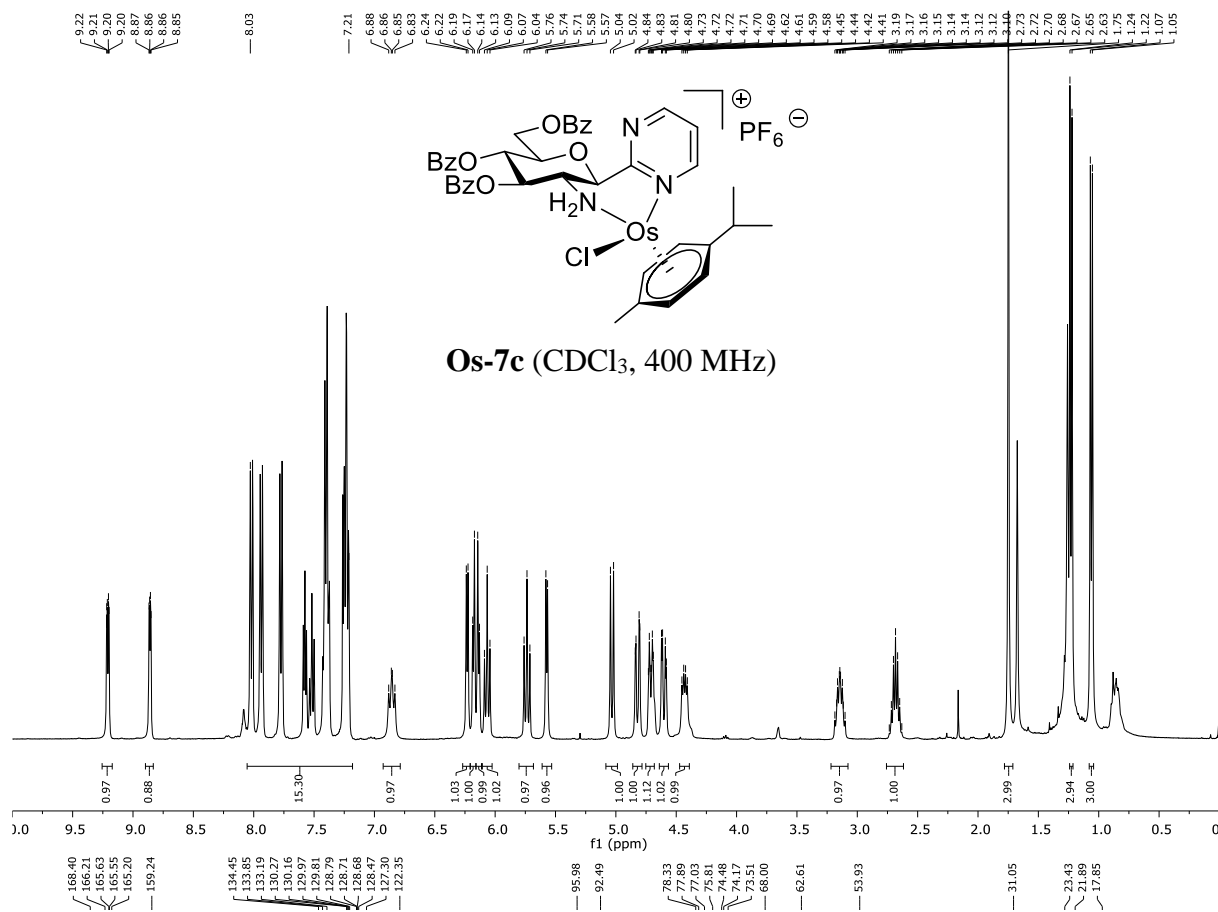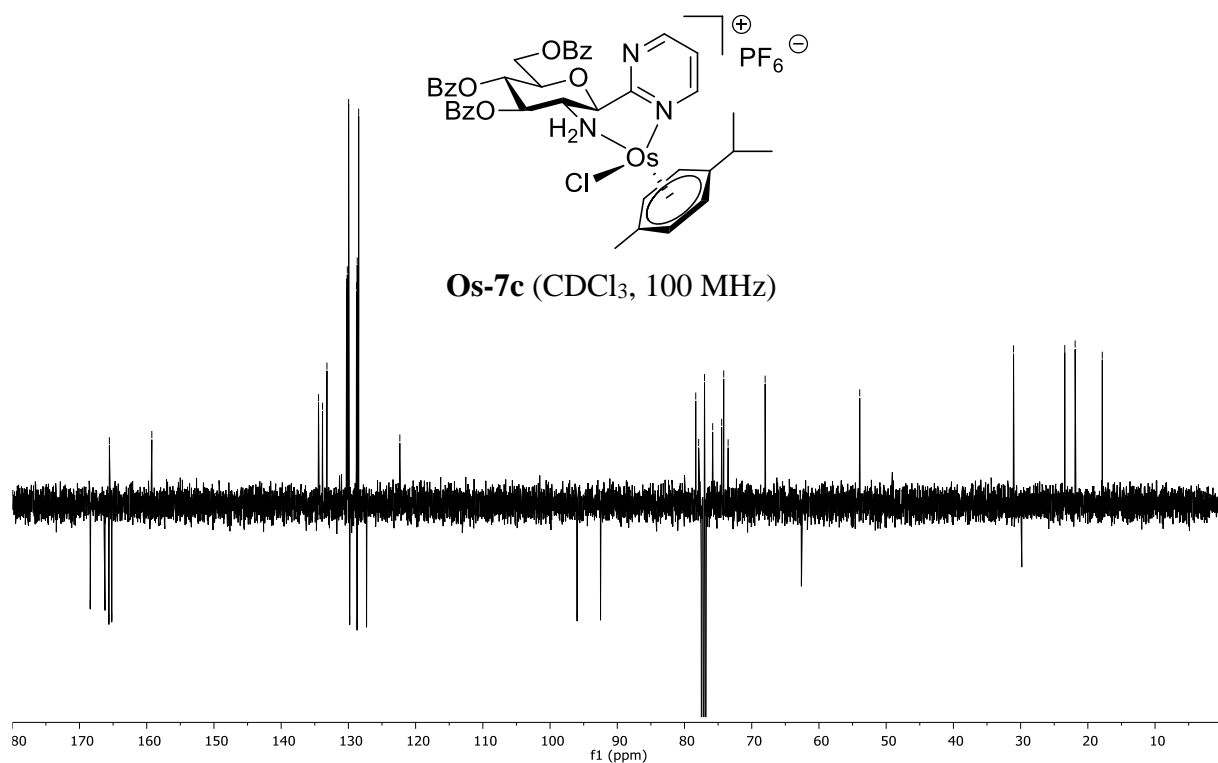

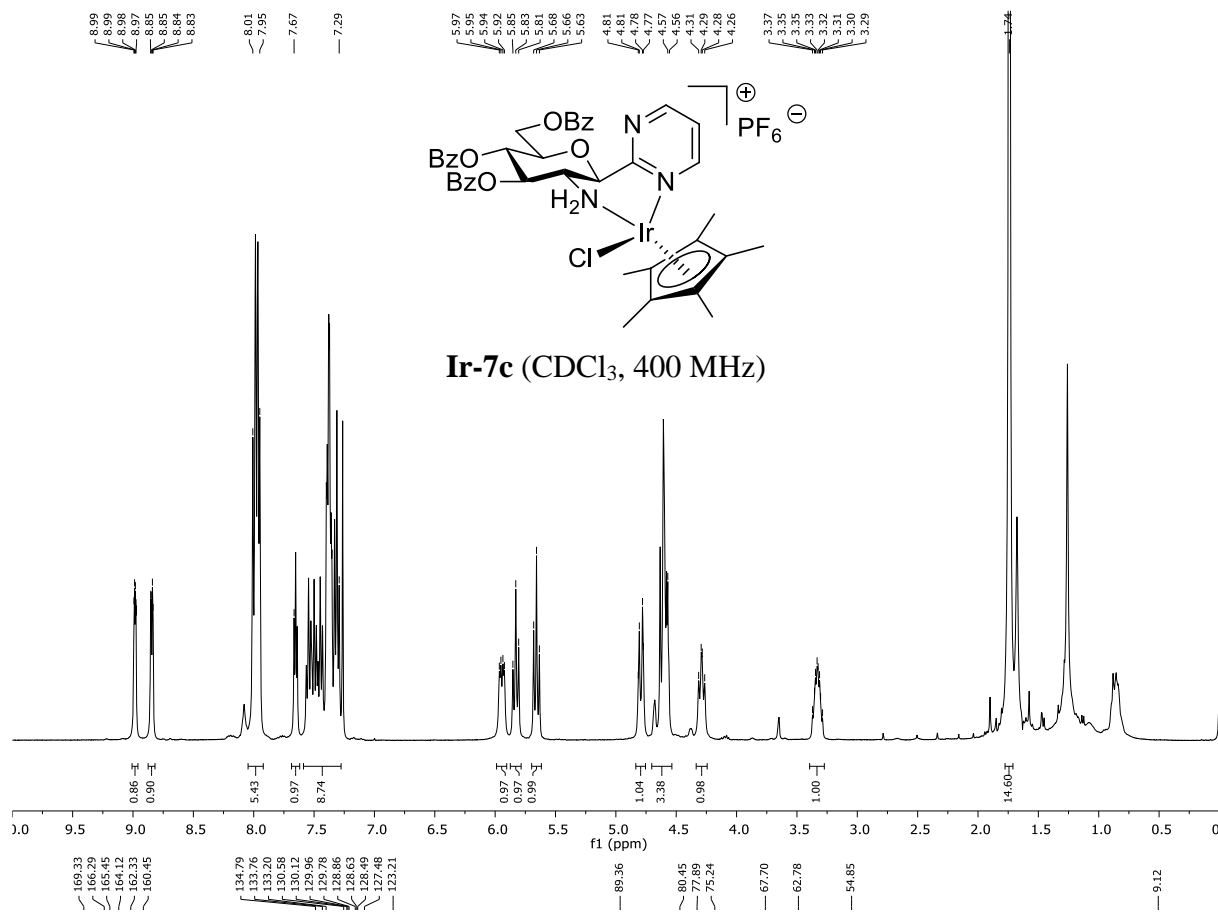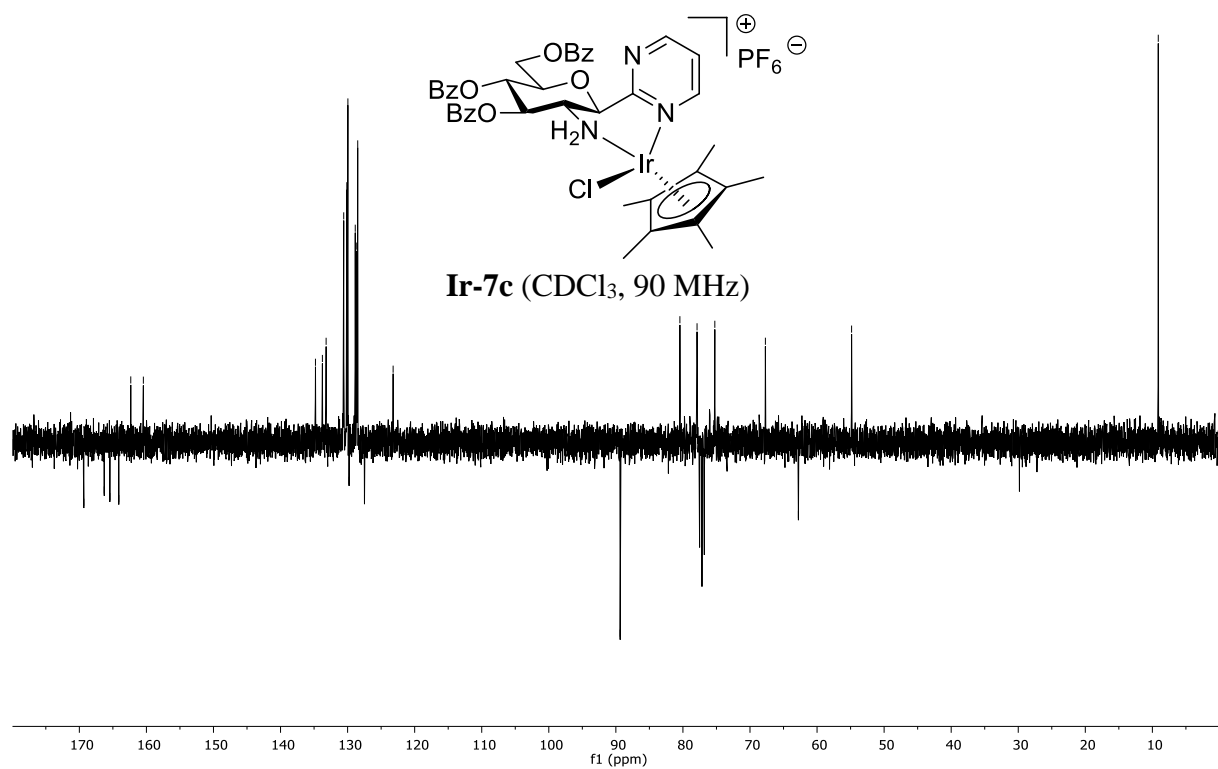

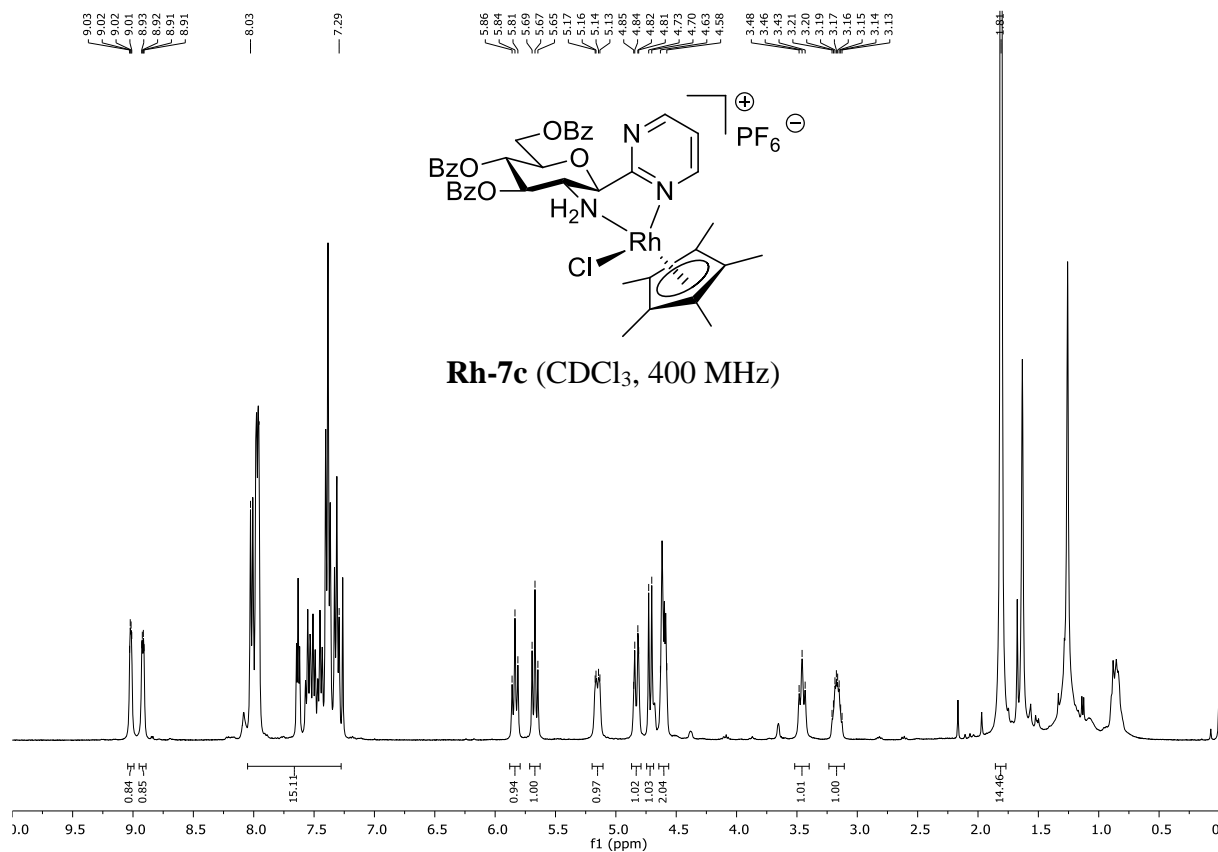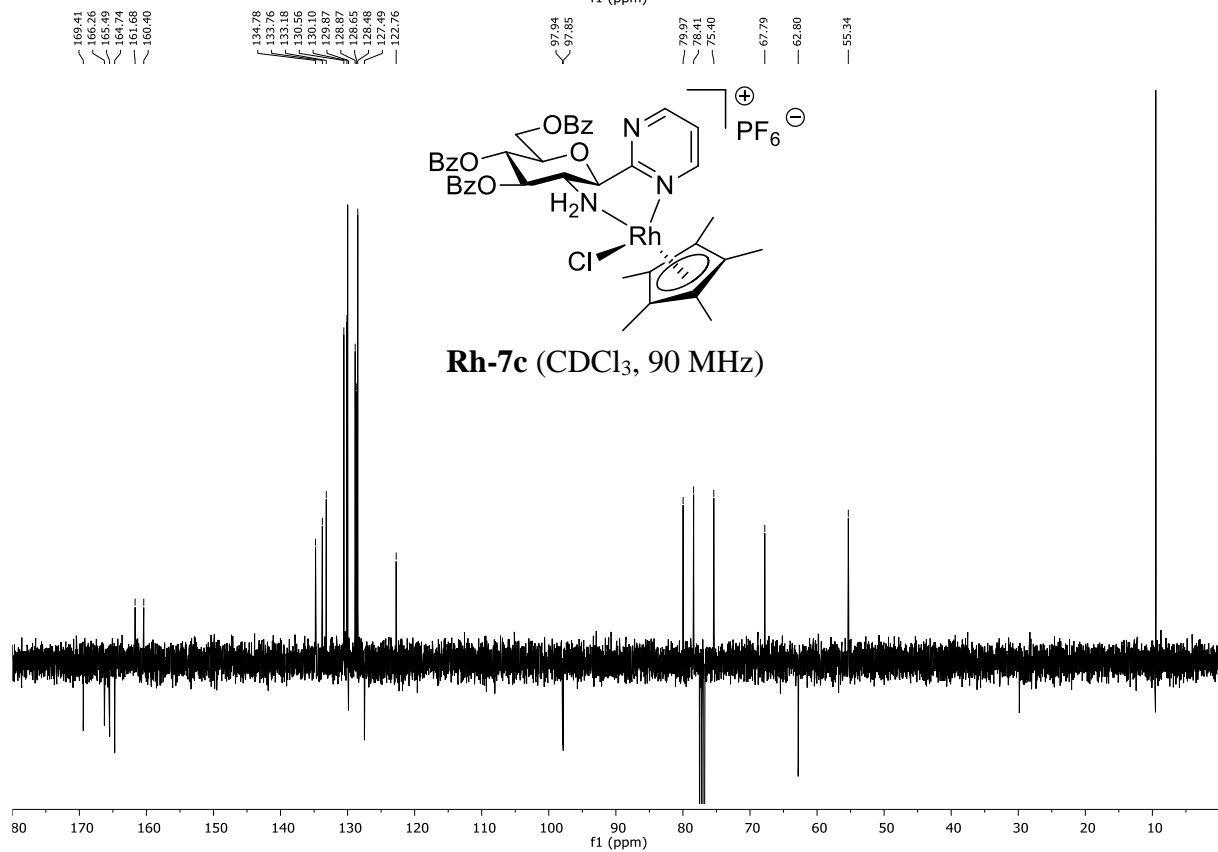

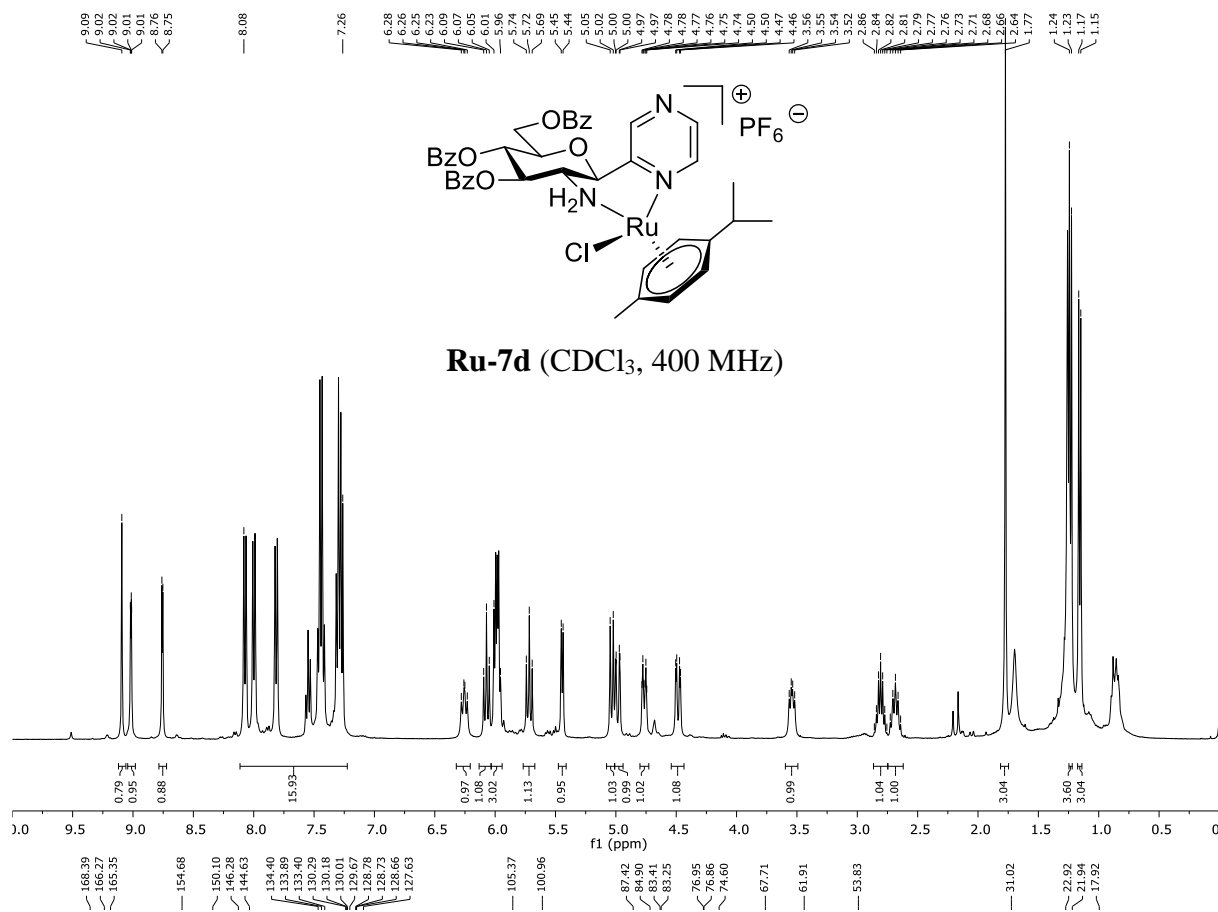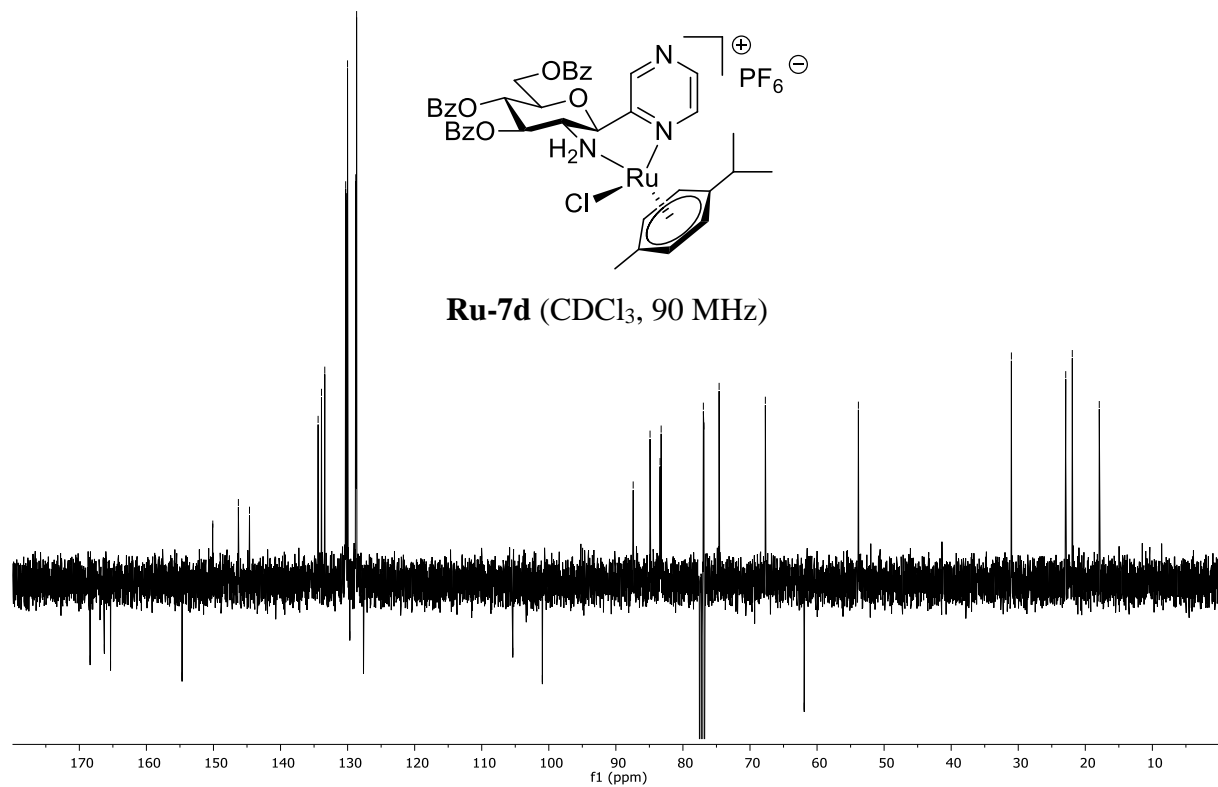

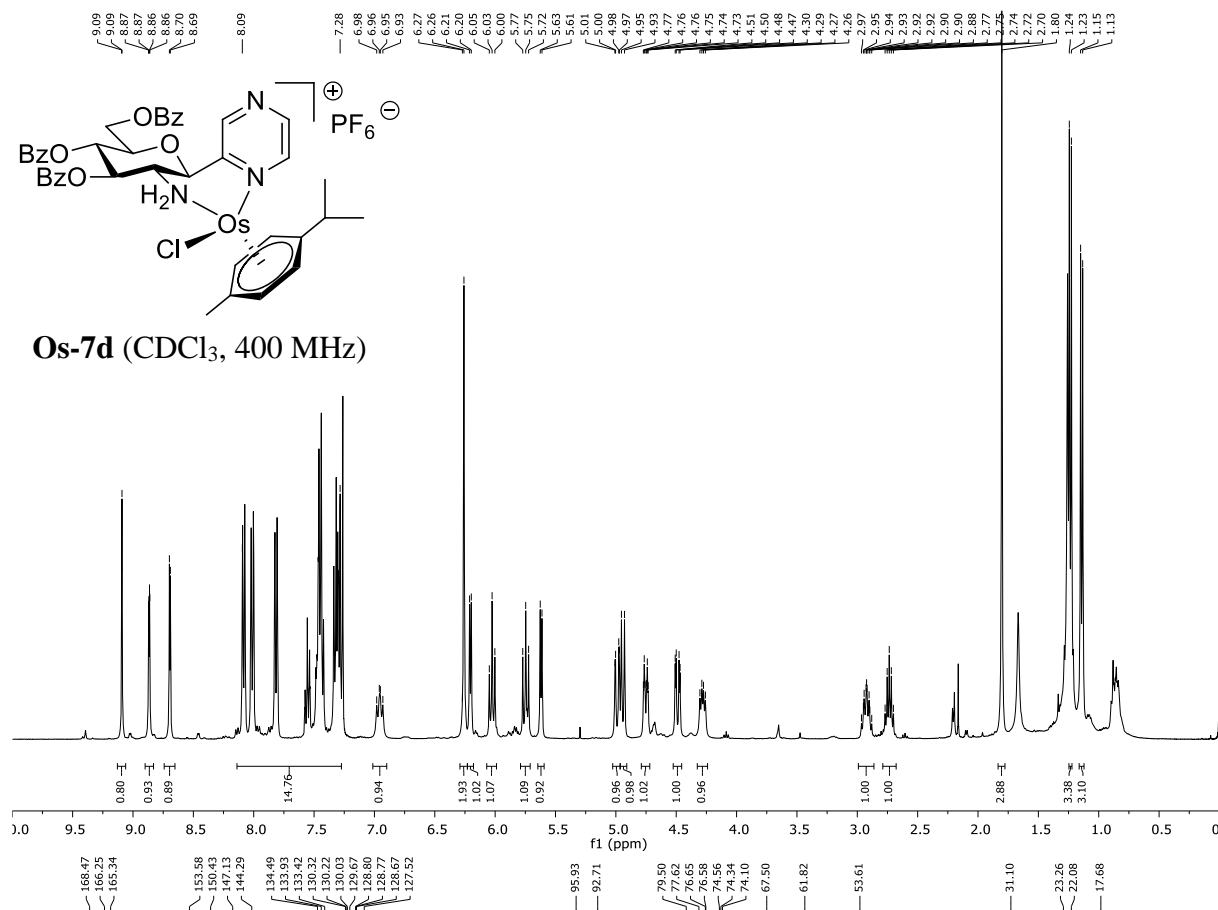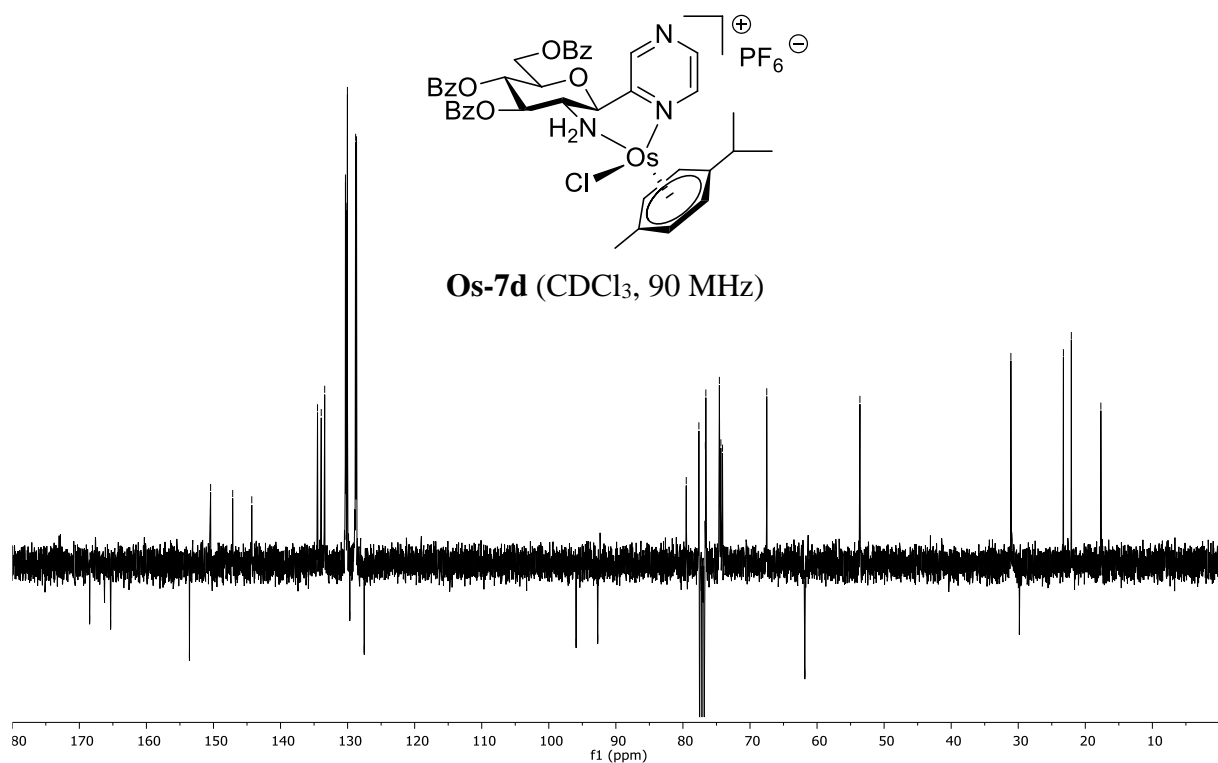

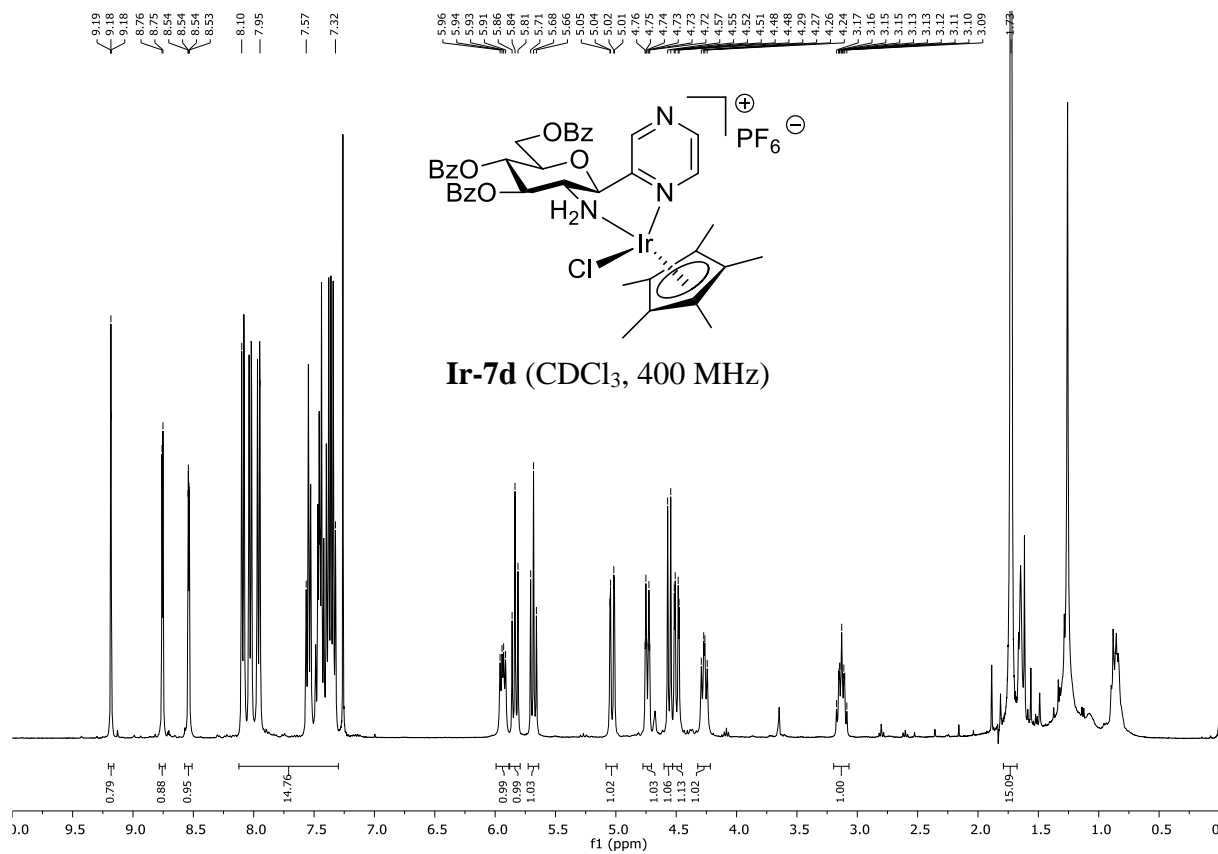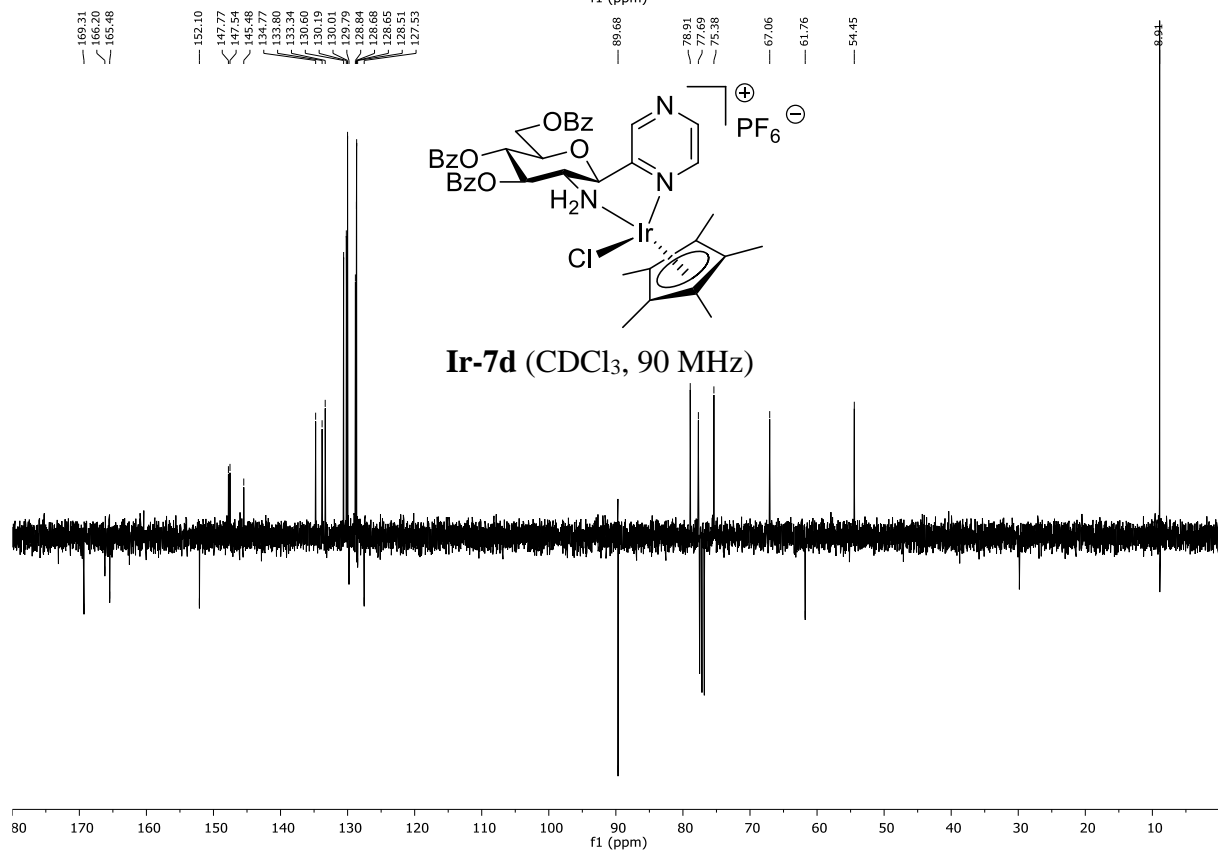

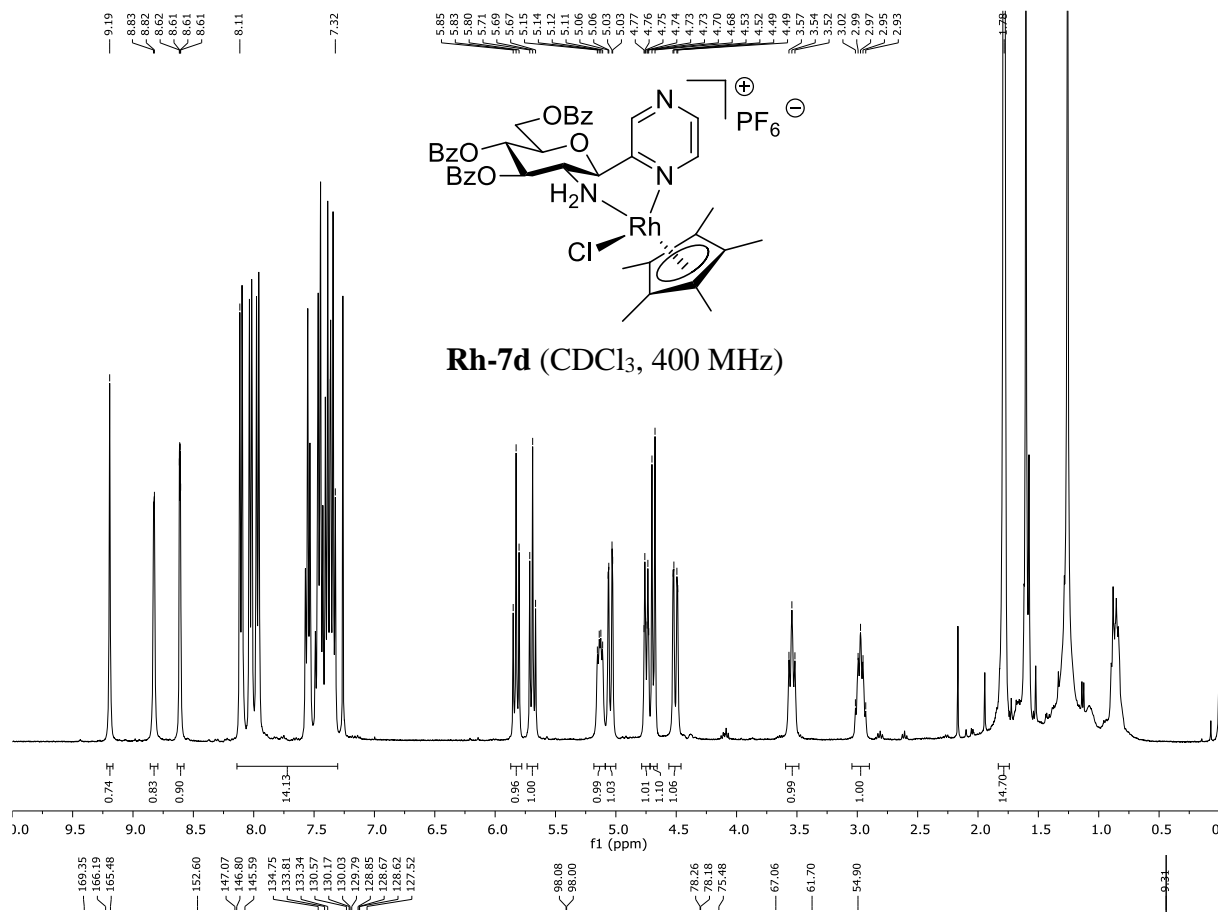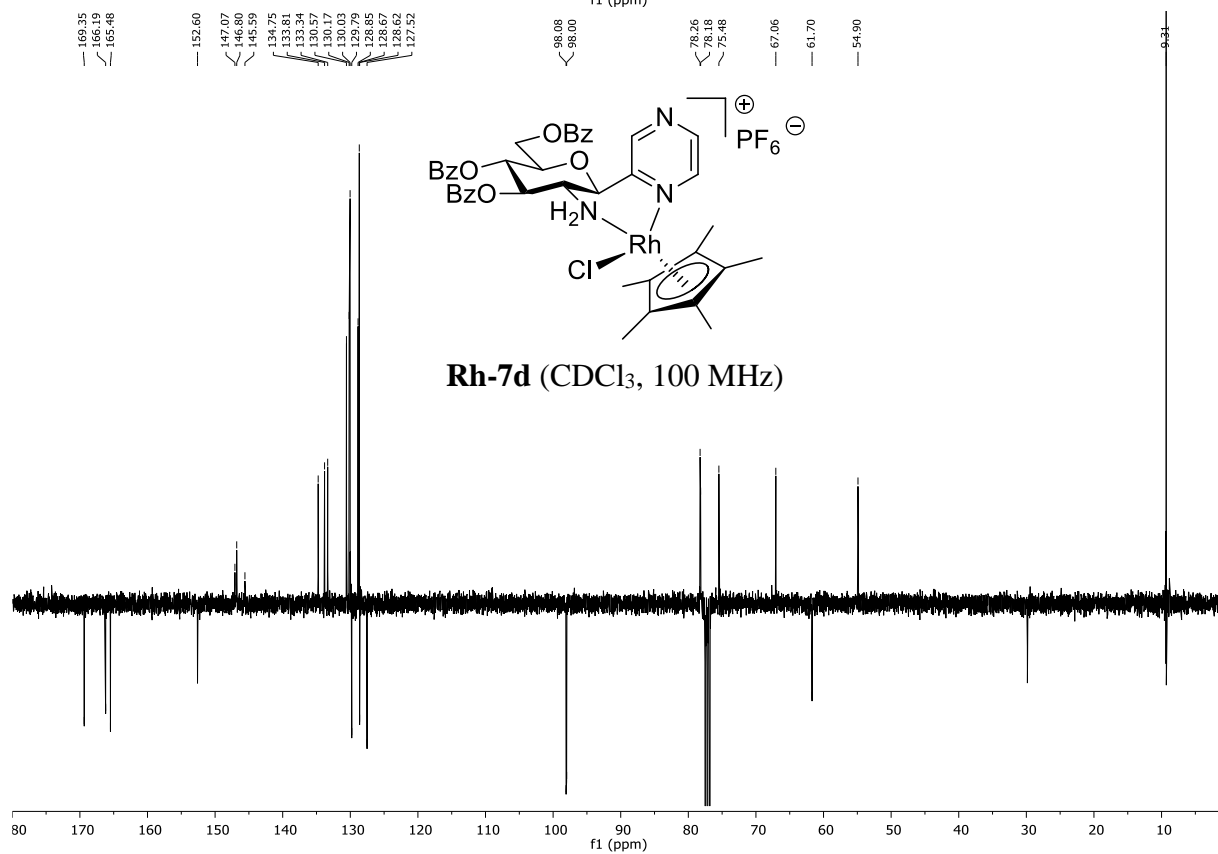

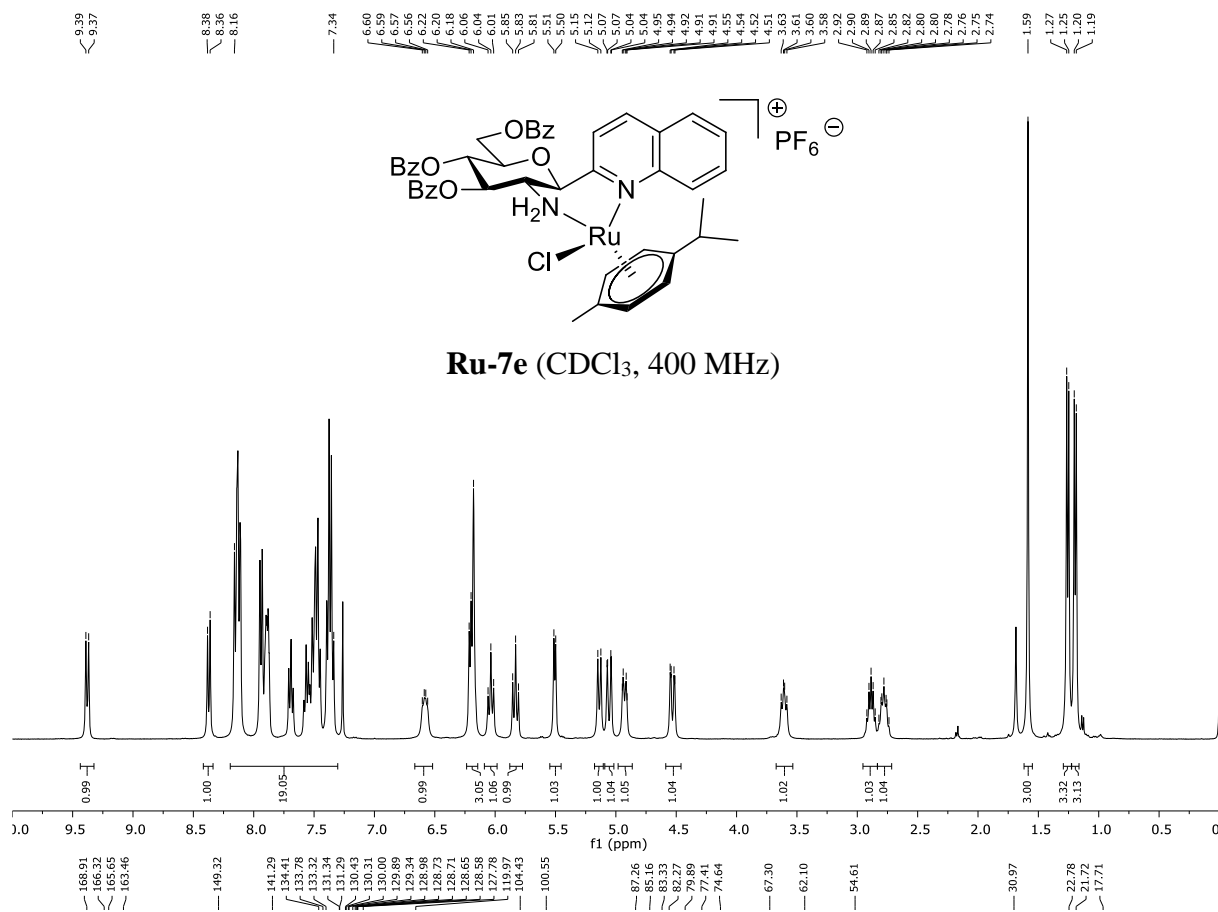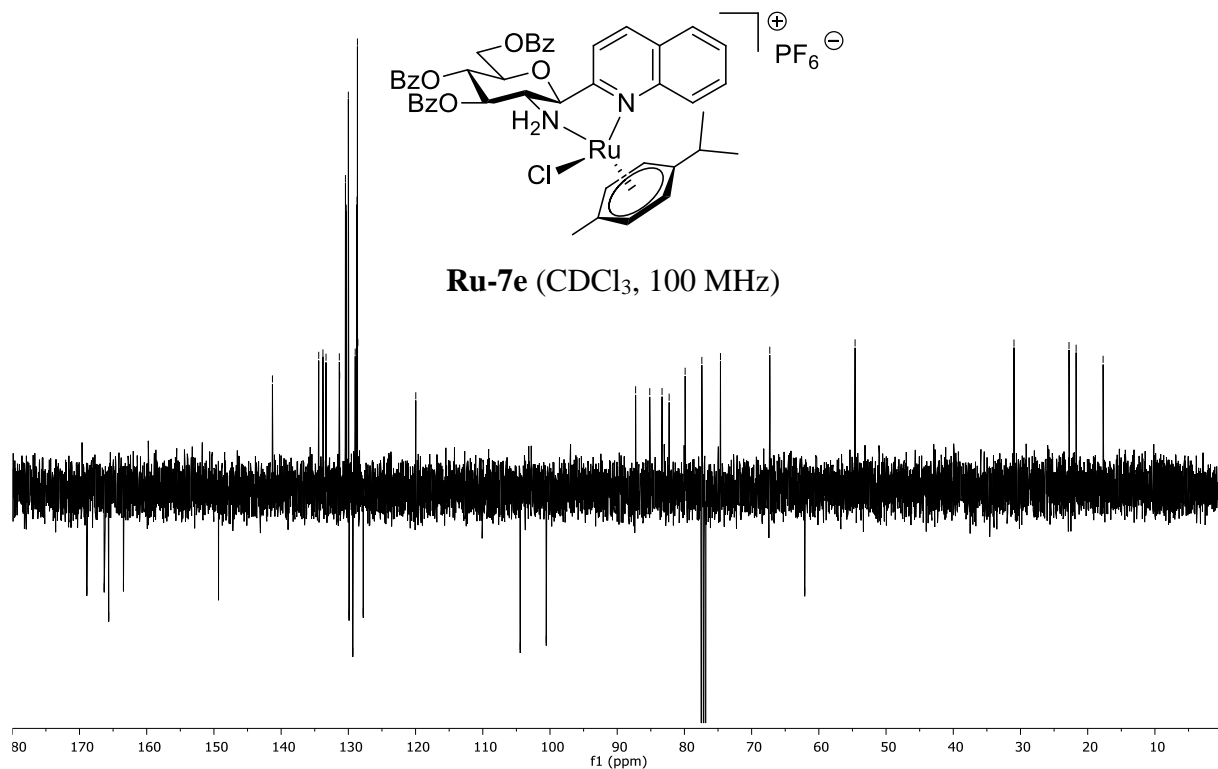

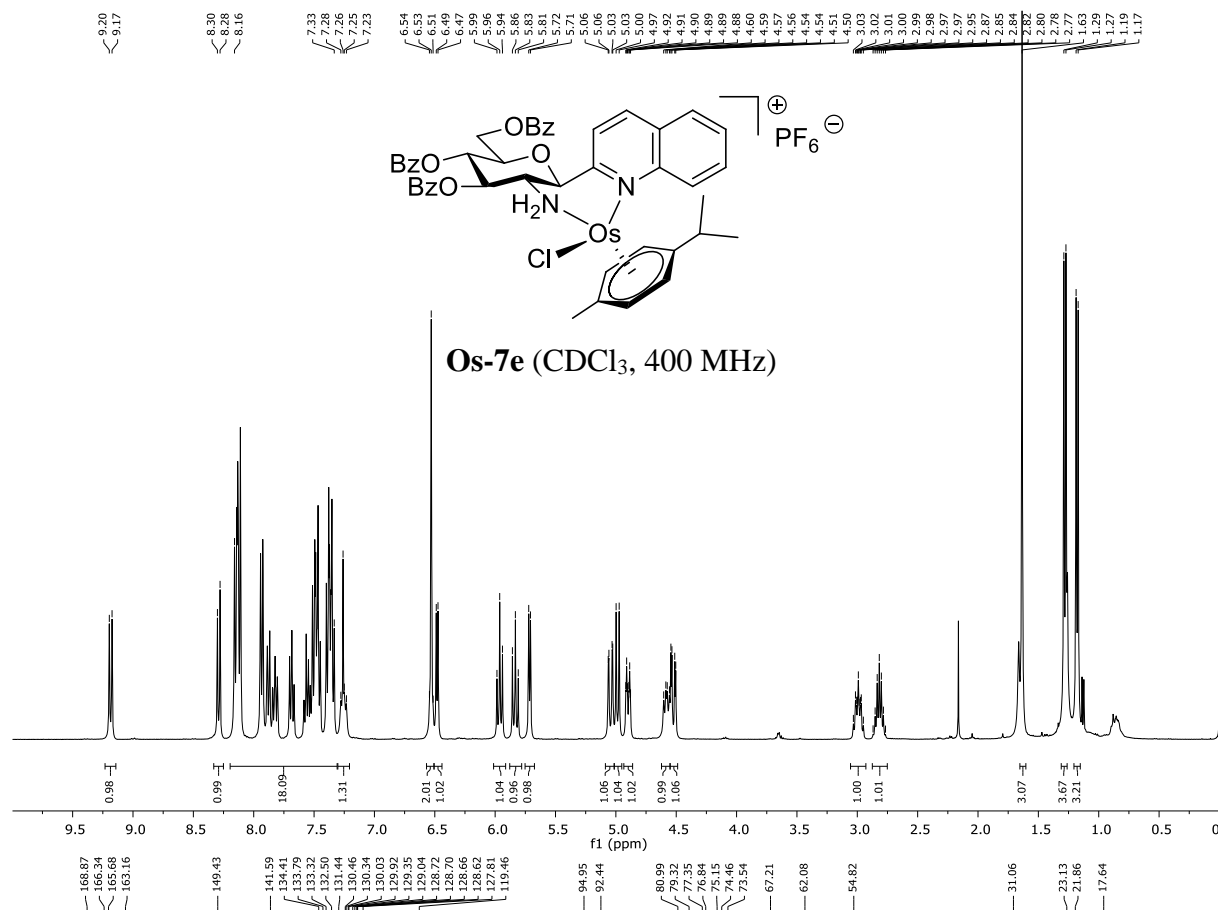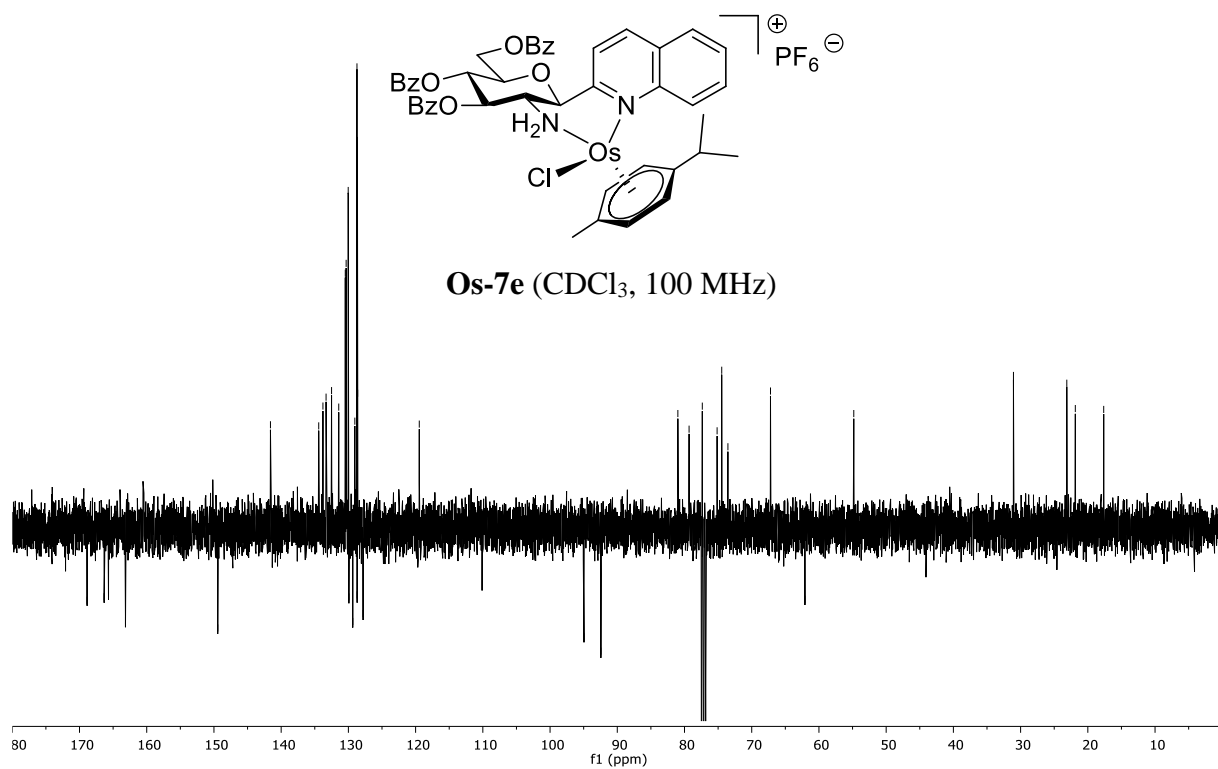

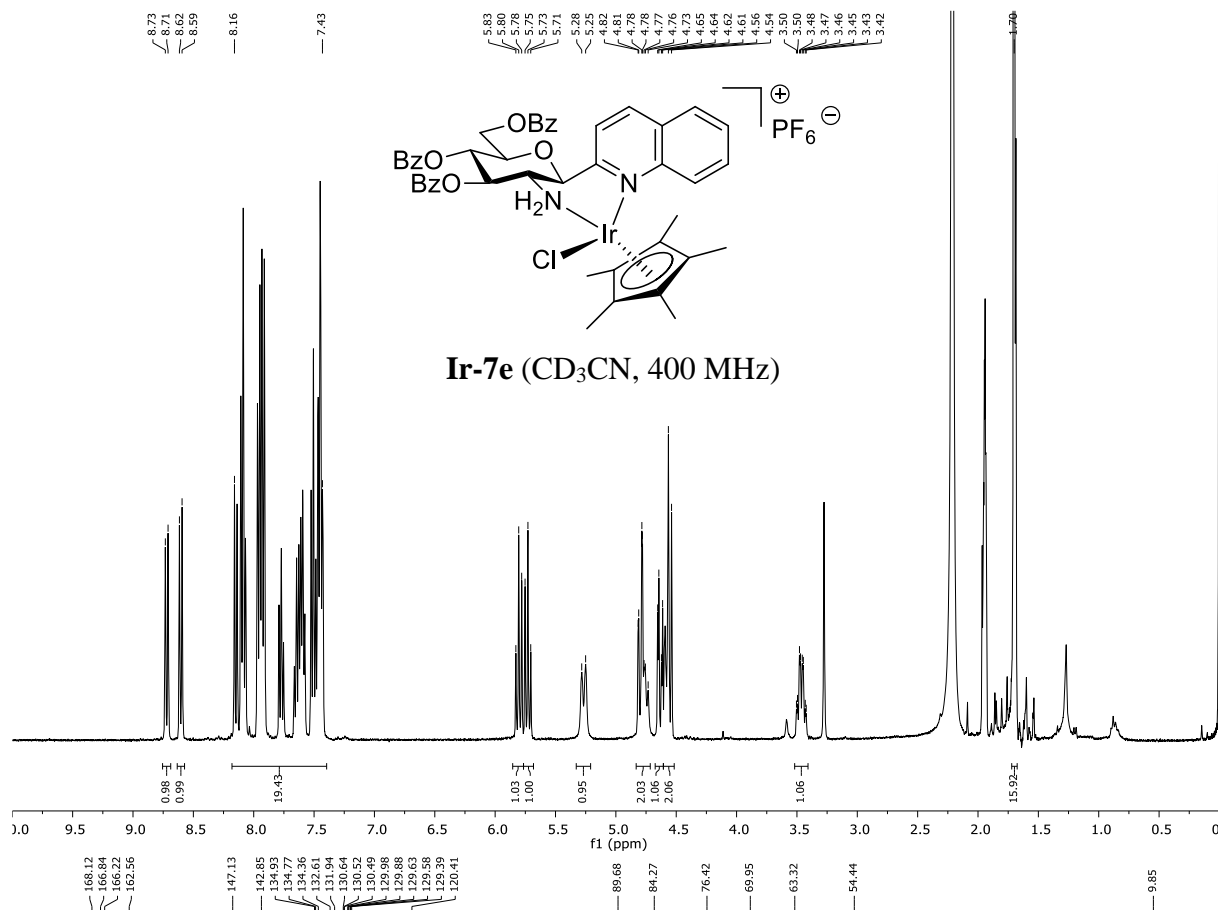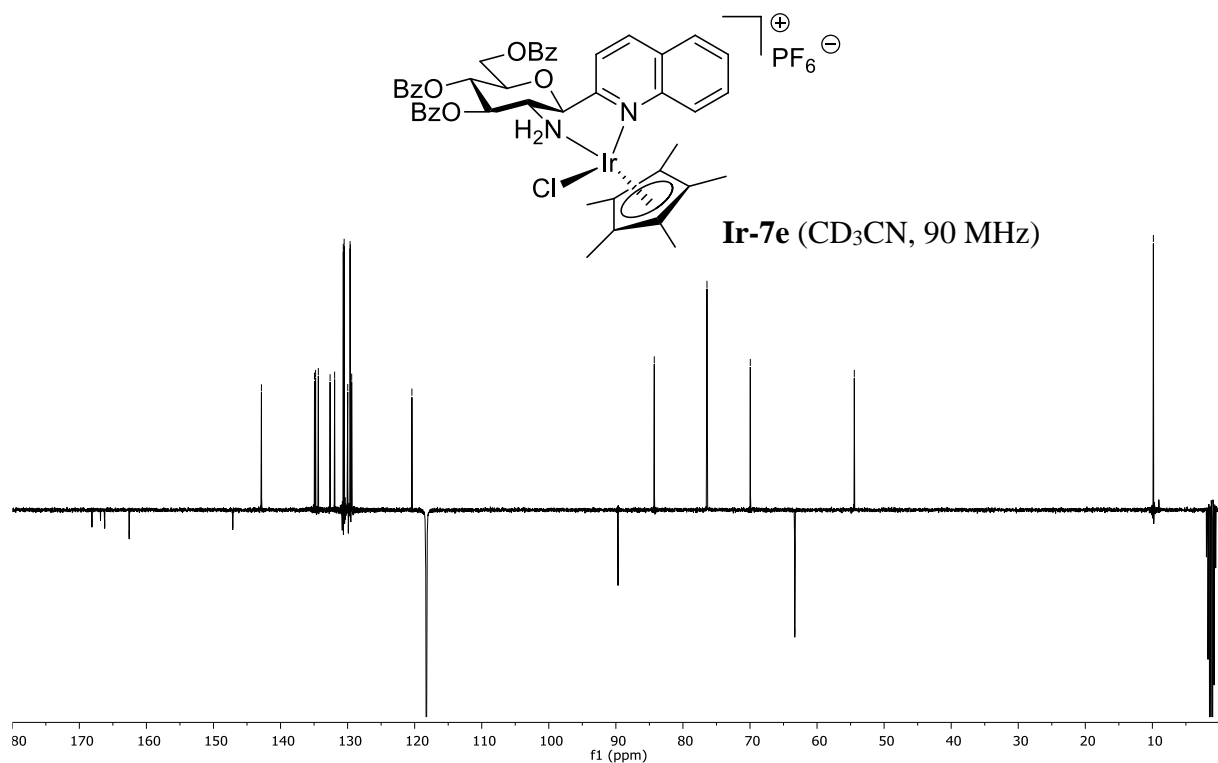

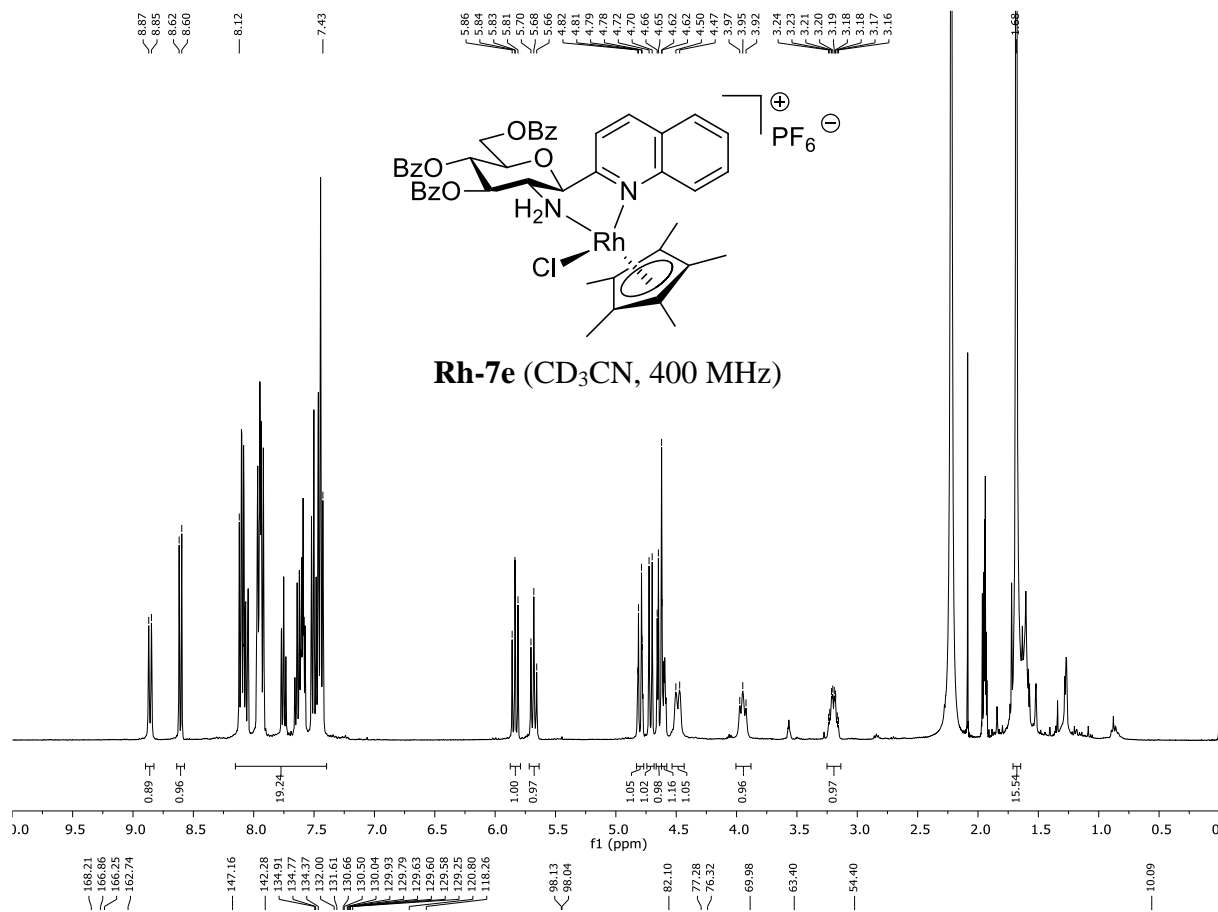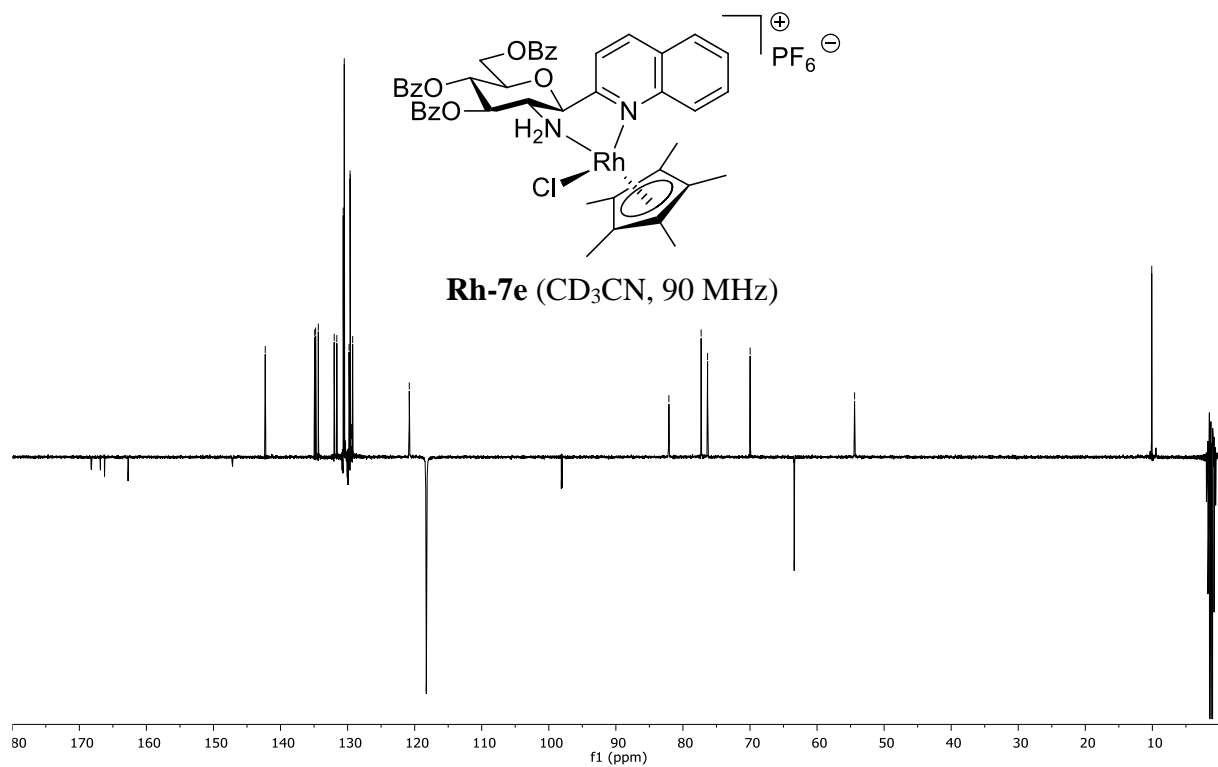

**2. Table S1.** Changes of the chemical shifts of selected  $^1\text{H}$  NMR resonances as a result of the complex formation ( $\Delta = \delta_{\text{complex}} - \delta_{\text{ligand or dimer}}$ )

|                  | H-6   | H-5   | H-4   | H-3   | H-6'a | H-6'b | H-5'  | H-2'  | H-1'  | <i>i</i> -Pr-CH | Ar-CH <sub>3</sub> |
|------------------|-------|-------|-------|-------|-------|-------|-------|-------|-------|-----------------|--------------------|
| <b>Ru-3a (R)</b> | +0.46 | +0.04 | +0.12 | +0.39 | +0.03 | +0.03 | +0.29 | -1.24 | +0.27 | -0.35           | -0.46              |
| <b>Os-3a (R)</b> | +0.31 | +0.05 | +0.11 | +0.43 | +0.03 | +0.03 | +0.29 | -0.95 | +0.23 | -0.31           | -0.46              |
| <b>Ir-3a (R)</b> | +0.02 | +0.06 | +0.20 | +0.43 | +0.07 | +0.01 | +0.39 | -0.71 | -0.02 | -               | -0.18              |
| <b>Rh-3a (R)</b> | +0.05 | +0.08 | +0.16 | +0.45 | +0.07 | +0.01 | +0.33 | -0.86 | -0.01 | -               | -0.19              |
| <b>Ru-3d (R)</b> | +0.13 | +0.41 | -     | +0.32 | +0.02 | +0.02 | +0.26 | -1.25 | +0.36 | -0.37           | -0.40              |
| <b>Os-3d (R)</b> | +0.04 | +0.23 | -     | +0.33 | +0.03 | +0.03 | +0.26 | -0.96 | +0.31 | -0.32           | -0.41              |
| <b>Ru-7a (R)</b> | +0.42 | -     | -     | -     | +0.29 | -0.03 | +0.61 | -0.97 | +0.39 | -0.04           | -0.35              |
| <b>Os-7a (R)</b> | +0.26 | -     | -     | -     | +0.36 | -0.03 | +0.59 | -0.76 | +0.35 | +0.04           | -0.36              |
| <b>Ir-7a (R)</b> | +0.07 | -     | -     | -     | +0.45 | +0.01 | +0.59 | -0.54 | -0.04 | -               | +0.17              |
| <b>Rh-7a (R)</b> | +0.08 | -     | -     | -     | +0.43 | -0.01 | +0.47 | -0.74 | 0.00  | -               | +0.14              |
| <b>Ru-7b (R)</b> | +0.01 | -     | +0.49 | -     | +0.32 | -0.06 | +0.41 | -0.67 | +0.41 | -0.13           | -0.31              |
| <b>Ru-7b (S)</b> | -0.09 | -     | +0.47 | -     | +0.05 | -0.05 | +0.15 | -0.36 | +0.36 | +0.08           | +0.12              |
| <b>Os-7b (R)</b> | -0.09 | -     | +0.52 | -     | +0.33 | -0.04 | +0.43 | -0.46 | +0.30 | -0.01           | -0.28              |
| <b>Os-7b (S)</b> | -0.24 | -     | +0.58 | -     | +0.08 | -0.04 | +0.13 | -0.23 | +0.67 | +0.10           | +0.05              |
| <b>Ir-7b (R)</b> | -0.08 | -     | +0.62 | -     | +0.34 | -0.04 | +0.48 | -0.15 | +0.07 | -               | +0.10              |
| <b>Ir-7b (S)</b> | -0.21 | -     | +0.57 | -     | +0.07 | +0.02 | +0.02 | +0.16 | +1.14 | -               | -0.02              |
| <b>Rh-7b (R)</b> | 0.00  | -     | +0.56 | -     | +0.30 | -0.04 | +0.46 | -0.29 | +0.25 | -               | +0.11              |
| <b>Rh-7b (S)</b> | -0.07 | -     | +0.45 | -     | -0.02 | -0.02 | -0.06 | -0.03 | +1.19 | -               | +0.03              |
| <b>Ru-7c (R)</b> | +0.49 | -     | +0.09 | -     | +0.22 | +0.09 | +0.44 | -0.89 | +0.44 | -0.18           | -0.44              |
| <b>Os-7c (R)</b> | +0.37 | -     | +0.02 | -     | +0.22 | +0.09 | +0.42 | -0.74 | +0.36 | -0.10           | -0.46              |
| <b>Ir-7c (R)</b> | 0.00  | -     | +0.14 | -     | +0.09 | +0.18 | +0.40 | -0.55 | +0.02 | -               | +0.15              |
| <b>Rh-7c (R)</b> | +0.08 | -     | +0.18 | -     | +0.06 | +0.15 | +0.37 | -0.71 | +0.05 | -               | +0.19              |
| <b>Ru-7d (R)</b> | +0.19 | +0.45 | -     | +0.27 | +0.33 | -0.03 | +0.48 | -0.96 | +0.41 | -0.12           | -0.39              |
| <b>Os-7d (R)</b> | +0.10 | +0.30 | -     | +0.27 | +0.34 | -0.02 | +0.47 | -0.72 | +0.32 | -0.04           | -0.41              |
| <b>Ir-7d (R)</b> | +0.19 | -0.03 | -     | +0.36 | +0.38 | -0.01 | +0.46 | -0.51 | -0.06 | -               | +0.14              |
| <b>Rh-7d (R)</b> | +0.26 | +0.04 | -     | +0.37 | +0.40 | 0.00  | +0.47 | -0.66 | +0.07 | -               | +0.16              |
| <b>Ru-7e (R)</b> | -     | -     | -     | -     | +0.39 | -0.01 | +0.62 | -0.92 | +0.41 | -0.04           | -0.57              |
| <b>Os-7e (R)</b> | -     | -     | -     | -     | +0.38 | -0.02 | +0.59 | -0.70 | +0.26 | +0.04           | -0.58              |
| <b>Ru-5a (R)</b> | +0.52 | +0.11 | +0.14 | +0.32 | +0.07 | +0.06 | +0.17 | -1.01 | -0.16 | +0.05           | -0.29              |

3. Table S2. Distribution coefficient of the synthesized complexes (logD)\*

| Complex      |                                                                                     | logD* | Complex      |                                                                                      | logD* |
|--------------|-------------------------------------------------------------------------------------|-------|--------------|--------------------------------------------------------------------------------------|-------|
| <b>Ru-3a</b> | 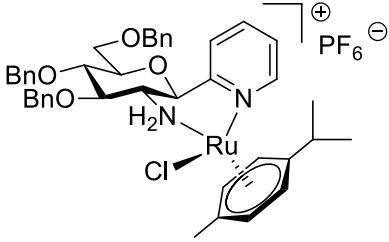   | +2.72 | <b>Os-3a</b> |    | +1.78 |
| <b>Ir-3a</b> |    | +3.18 | <b>Rh-3a</b> |    | +1.64 |
| <b>Ru-3d</b> |    | +2.06 | <b>Os-3d</b> |    | +2.64 |
| <b>Ru-5a</b> |  | -1.91 | -            | -                                                                                    | -     |
| <b>Ru-7a</b> |  | +1.15 | <b>Os-7a</b> |  | +2.15 |
| <b>Ir-7a</b> |  | +1.08 | <b>Rh-7a</b> |  | +1.20 |
| <b>Ru-7b</b> |  | +1.39 | <b>Os-7b</b> |  | +1.32 |

|                                                                    |                                                                                     |       |              |                                                                                      |       |
|--------------------------------------------------------------------|-------------------------------------------------------------------------------------|-------|--------------|--------------------------------------------------------------------------------------|-------|
| <b>Ir-7b</b>                                                       | 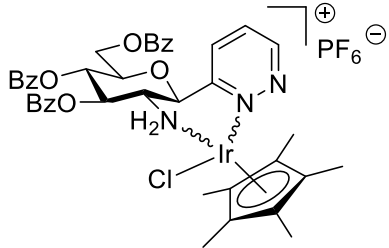   | +1.17 | <b>Rh-7b</b> |    | +1.41 |
| <b>Ru-7c</b>                                                       |    | +1.31 | <b>Os-7c</b> |    | +1.59 |
| <b>Ir-7c</b>                                                       |    | +1.40 | <b>Rh-7c</b> |    | +1.13 |
| <b>Ru-7d</b>                                                       |   | +1.26 | <b>Os-7d</b> |   | +1.42 |
| <b>Ir-7d</b>                                                       |  | +1.30 | <b>Rh-7d</b> |  | +1.04 |
| <b>Ru-7e</b>                                                       |  | +2.22 | <b>Os-7e</b> |  | +2.21 |
| <b>Ir-7e</b>                                                       |  | +1.39 | <b>Rh-7e</b> |  | +1.66 |
| *logD was determined in an <i>n</i> -octanol-PBS (pH = 7.4) system |                                                                                     |       |              |                                                                                      |       |

#### 4. X-Ray diffraction study of Ru-3a

##### General information

X-Ray-quality crystals of **Ru-3a** were grown by slow evaporation of a CHCl<sub>3</sub>-MeOH solvent mixture. A crystal well-looking in polarized light microscope was fixed under a microscope onto a Mitegen loop using high-density oil. Diffraction intensity data were collected at room temperature using a Bruker-D8 Venture diffractometer (Bruker AXS GmbH, Karlsruhe, Germany) equipped with INCOATEC I $\mu$ S 3.0 (Incoatec GmbH, Geesthacht, Germany) dual (Cu and Mo) sealed tube micro sources and a Photon II Charge-Integrating Pixel Array detector (Bruker AXS GmbH, Karlsruhe, Germany) using Mo K $\alpha$  ( $\lambda$  = 0.71073 Å) radiation. High multiplicity data collection and integration were performed using APEX4 (version 2021-4.0, Bruker AXS Inc., 2021, Madison, USA) software. Data reduction and multi-scan absorption correction were performed using SAINT (version 8.40B, Bruker AXS Inc., 2019, Madison, USA). The structure was solved using direct methods and refined on F<sup>2</sup> using the SHELXL program [1] incorporated into the APEX4 suite. Refinement was performed anisotropically for all non-hydrogen atoms. Hydrogen atoms were placed into geometric positions except the amino protons which could be found on the difference electron density map and the respective N-H distances should be restrained. Multi-scan absorption correction had to be applied because of the presence of heavy atoms and shape of the crystal. Further experimental details are shown in Table S3. The CIF file was manually edited using PubCIF software [2], while graphics were prepared using the Mercury program [3]. The results for the X-ray diffraction structure determinations were good enough and acceptable according to the CheckCIF functionality of PLATON software (Utrecht University, Utrecht, The Netherlands) [4], and structural parameters such as bond length and angle data were in the expected range (Table S5) and except the short Ru-Cl distance. The solid state structure is stabilized by strong N-H...Cl and N-H...F as well as weak C-H...Cl hydrogen bonds (Figure S2 and Table S4).

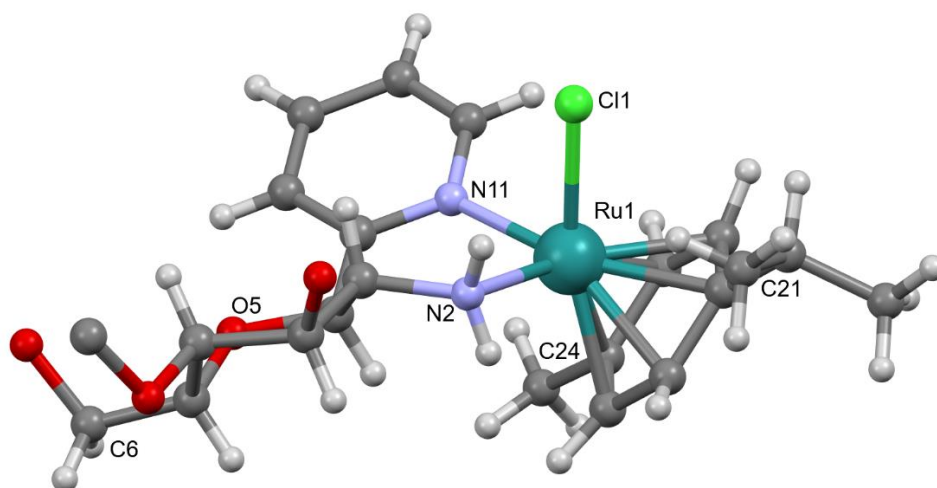

**Figure S1.** Ball and stick model of **Ru-3a** with partial numbering scheme. The structure is truncated for the better visibility of the coordination geometry.

**Table S3.** Experimental details

|                                                                               |                                                                                            |
|-------------------------------------------------------------------------------|--------------------------------------------------------------------------------------------|
| Crystal data                                                                  |                                                                                            |
| Chemical formula                                                              | C <sub>42</sub> H <sub>48</sub> ClF <sub>6</sub> N <sub>2</sub> O <sub>4</sub> PRu         |
| $M_r$                                                                         | 926.31                                                                                     |
| Crystal system, space group                                                   | Monoclinic, $P2_1$                                                                         |
| Temperature (K)                                                               | 294                                                                                        |
| $a, b, c$ (Å)                                                                 | 11.6071 (16), 16.655 (2), 11.7541 (19)                                                     |
| $\beta$ (°)                                                                   | 113.396 (3)                                                                                |
| $V$ (Å <sup>3</sup> )                                                         | 2085.4 (5)                                                                                 |
| $Z$                                                                           | 2                                                                                          |
| Radiation type                                                                | Mo $K\alpha$                                                                               |
| $\mu$ (mm <sup>-1</sup> )                                                     | 0.55                                                                                       |
| Crystal size (mm)                                                             | 0.26 × 0.24 × 0.05                                                                         |
| Data collection                                                               |                                                                                            |
| Diffractometer                                                                | Bruker D8 VENTURE                                                                          |
| Absorption correction                                                         | Multi-scan<br>SADABS2016/2 - Bruker AXS area detector<br>scaling and absorption correction |
| $T_{\min}, T_{\max}$                                                          | 0.87, 0.97                                                                                 |
| No. of measured, independent and<br>observed [ $I > 2\sigma(I)$ ] reflections | 36696, 7605, 4883                                                                          |
| $R_{\text{int}}$                                                              | 0.171                                                                                      |
| $(\sin \theta/\lambda)_{\max}$ (Å <sup>-1</sup> )                             | 0.603                                                                                      |
| Refinement                                                                    |                                                                                            |
| $R[F^2 > 2\sigma(F^2)], wR(F^2), S$                                           | 0.083, 0.185, 1.07                                                                         |
| No. of reflections                                                            | 7605                                                                                       |
| No. of parameters                                                             | 524                                                                                        |
| No. of restraints                                                             | 3                                                                                          |
| H-atom treatment                                                              | H atoms treated by a mixture of independent<br>and constrained refinement                  |
| $\Delta\rho_{\max}, \Delta\rho_{\min}$ (e Å <sup>-3</sup> )                   | 0.59, -0.78                                                                                |
| Absolute structure                                                            | Flack x determined using 1527 quotients [(I+)-<br>(I-)]/[(I+)+(I-)] [5]                    |
| Absolute structure parameter                                                  | 0.05 (5)                                                                                   |

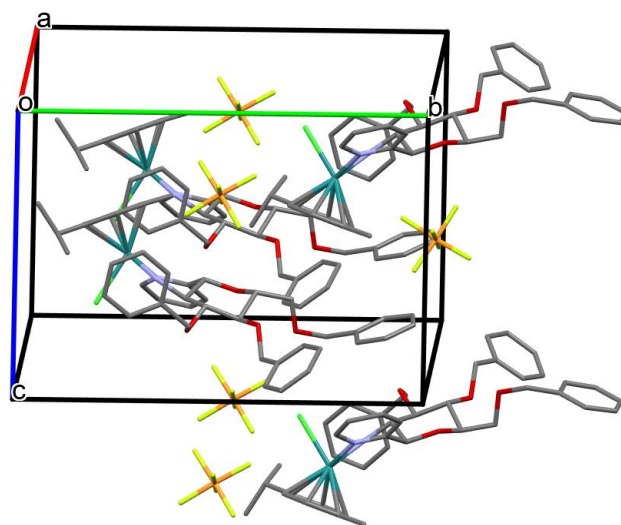

**Figure S2.** Packing diagram of **Ru-3a**. Hydrogen atoms are omitted for clarity.

**Table S4.** Hydrogen-bond geometry (Å, °) for **Ru-3a**

| $D-H\cdots A$                            | $D-H$    | $H\cdots A$ | $D\cdots A$ | $D-H\cdots A$ |
|------------------------------------------|----------|-------------|-------------|---------------|
| $C37-H37A\cdots O4$                      | 0.97     | 2.56        | 3.15 (2)    | 119           |
| $C47-H47A\cdots Cl1^i$                   | 0.97     | 2.93        | 3.868 (19)  | 162           |
| $C67-H67B\cdots Cl1^i$                   | 0.97     | 2.92        | 3.56 (2)    | 124           |
| $N2-H2A\cdots Cl1$                       | 0.87 (3) | 2.53 (17)   | 2.987 (15)  | 114 (14)      |
| $N2-H2B\cdots F5$                        | 0.87 (3) | 2.56 (9)    | 3.37 (2)    | 155 (17)      |
| Symmetry code: (i) $-x+1, y+1/2, -z+2$ . |          |             |             |               |

**Table S5.** Geometric parameters (Å, °) for **Ru-3a**

| Distances, Å |            |          |          |
|--------------|------------|----------|----------|
| C1—O5        | 1.428 (16) | C30—H30C | 0.9600   |
| C1—C12       | 1.516 (19) | C31—C32  | 1.33 (3) |
| C1—C2        | 1.536 (19) | C31—C36  | 1.38 (3) |
| C1—H1A       | 0.9800     | C31—C37  | 1.50 (3) |
| C3—O3        | 1.431 (18) | C32—C33  | 1.43 (3) |
| C3—C4        | 1.52 (2)   | C32—H32  | 0.9300   |
| C3—C2        | 1.527 (19) | C33—C34  | 1.34 (4) |
| C3—H3        | 0.9800     | C33—H33  | 0.9300   |
| C4—O4        | 1.438 (19) | C34—C35  | 1.38 (4) |
| C4—C5        | 1.53 (2)   | C34—H34  | 0.9300   |
| C4—H4        | 0.9800     | C35—C36  | 1.41 (3) |
| C5—O5        | 1.455 (18) | C35—H35  | 0.9300   |
| C5—C6        | 1.50 (2)   | C36—H36  | 0.9300   |
| C5—H5        | 0.9800     | C37—O3   | 1.44 (2) |
| C6—O6        | 1.38 (2)   | C37—H37A | 0.9700   |
| C6—H6A       | 0.9700     | C37—H37B | 0.9700   |
| C6—H6B       | 0.9700     | C41—C42  | 1.34 (2) |
| C2—N2        | 1.48 (2)   | C41—C46  | 1.40 (2) |
| C2—H2        | 0.9800     | C41—C47  | 1.51 (2) |
| C12—N11      | 1.353 (19) | C42—C43  | 1.36 (3) |
| C12—C13      | 1.36 (2)   | C42—H42  | 0.9300   |
| C13—C14      | 1.38 (2)   | C43—C44  | 1.37 (3) |
| C13—H13A     | 0.9300     | C43—H43  | 0.9300   |
| C14—C15      | 1.38 (2)   | C44—C45  | 1.40 (3) |
| C14—H14A     | 0.9300     | C44—H44  | 0.9300   |
| C15—C16      | 1.35 (2)   | C45—C46  | 1.41 (3) |
| C15—H15A     | 0.9300     | C45—H45  | 0.9300   |
| C16—N11      | 1.359 (18) | C46—H46  | 0.9300   |
| C16—H16A     | 0.9300     | C47—O4   | 1.41 (2) |
| C21—C22      | 1.38 (2)   | C47—H47A | 0.9700   |
| C21—C26      | 1.40 (2)   | C47—H47B | 0.9700   |
| C21—C27      | 1.53 (2)   | C61—C62  | 1.38 (3) |
| C21—Ru1      | 2.184 (15) | C61—C66  | 1.39 (3) |
| C22—C23      | 1.40 (2)   | C61—C67  | 1.49 (3) |
| C22—Ru1      | 2.184 (15) | C62—C63  | 1.38 (3) |
| C22—H22      | 0.9800     | C62—H62  | 0.9300   |
| C23—C24      | 1.43 (2)   | C63—C64  | 1.40 (4) |
| C23—Ru1      | 2.177 (17) | C63—H63  | 0.9300   |

|            |            |               |            |
|------------|------------|---------------|------------|
| C23—H23    | 0.9800     | C64—C65       | 1.35 (4)   |
| C24—C25    | 1.38 (2)   | C64—H64       | 0.9300     |
| C24—C30    | 1.49 (2)   | C65—C66       | 1.36 (3)   |
| C24—Ru1    | 2.207 (18) | C65—H65       | 0.9300     |
| C25—C26    | 1.43 (2)   | C66—H66       | 0.9300     |
| C25—Ru1    | 2.164 (18) | N2—Ru1        | 2.153 (13) |
| C25—H25    | 0.9800     | N2—H2A        | 0.87 (3)   |
| C26—Ru1    | 2.166 (17) | N2—H2B        | 0.87 (3)   |
| C26—H26    | 0.9800     | N11—Ru1       | 2.091 (14) |
| C27—C28    | 1.49 (3)   | O6—C67        | 1.43 (2)   |
| C27—C29    | 1.51 (2)   | C67—H67A      | 0.9700     |
| C27—H27    | 0.9800     | C67—H67B      | 0.9700     |
| C28—H28A   | 0.9600     | F1—P1         | 1.505 (16) |
| C28—H28B   | 0.9600     | F2—P1         | 1.569 (14) |
| C28—H28C   | 0.9600     | F3—P1         | 1.551 (15) |
| C29—H29A   | 0.9600     | F4—P1         | 1.573 (16) |
| C29—H29B   | 0.9600     | F5—P1         | 1.599 (13) |
| C29—H29C   | 0.9600     | F6—P1         | 1.533 (16) |
| C30—H30A   | 0.9600     | Cl1—Ru1       | 2.374 (5)  |
| C30—H30B   | 0.9600     |               |            |
| O5—C1—C12  | 104.9 (12) | C34—C35—H35   | 120.2000   |
| O5—C1—C2   | 112.1 (11) | C36—C35—H35   | 120.2000   |
| C12—C1—C2  | 110.3 (12) | C31—C36—C35   | 118 (2)    |
| O5—C1—H1A  | 109.8000   | C31—C36—H36   | 121.2000   |
| C12—C1—H1A | 109.8000   | C35—C36—H36   | 121.2000   |
| C2—C1—H1A  | 109.8000   | O3—C37—C31    | 113.8 (15) |
| O3—C3—C4   | 111.7 (14) | O3—C37—H37A   | 108.8000   |
| O3—C3—C2   | 105.7 (12) | C31—C37—H37A  | 108.8000   |
| C4—C3—C2   | 109.8 (13) | O3—C37—H37B   | 108.8000   |
| O3—C3—H3   | 109.9000   | C31—C37—H37B  | 108.8000   |
| C4—C3—H3   | 109.9000   | H37A—C37—H37B | 107.7000   |
| C2—C3—H3   | 109.9000   | C42—C41—C46   | 119.1 (17) |
| O4—C4—C3   | 108.7 (14) | C42—C41—C47   | 120.5 (17) |
| O4—C4—C5   | 109.1 (14) | C46—C41—C47   | 120.4 (17) |
| C3—C4—C5   | 107.2 (14) | C41—C42—C43   | 123 (2)    |
| O4—C4—H4   | 110.6000   | C41—C42—H42   | 118.4000   |
| C3—C4—H4   | 110.6000   | C43—C42—H42   | 118.4000   |
| C5—C4—H4   | 110.6000   | C42—C43—C44   | 119 (3)    |
| O5—C5—C6   | 107.2 (14) | C42—C43—H43   | 120.4000   |
| O5—C5—C4   | 105.1 (13) | C44—C43—H43   | 120.4000   |

|              |            |               |            |
|--------------|------------|---------------|------------|
| C6—C5—C4     | 115.1 (14) | C43—C44—C45   | 121 (2)    |
| O5—C5—H5     | 109.8000   | C43—C44—H44   | 119.6000   |
| C6—C5—H5     | 109.8000   | C45—C44—H44   | 119.6000   |
| C4—C5—H5     | 109.8000   | C44—C45—C46   | 118 (2)    |
| O6—C6—C5     | 111.6 (14) | C44—C45—H45   | 120.9000   |
| O6—C6—H6A    | 109.3000   | C46—C45—H45   | 120.9000   |
| C5—C6—H6A    | 109.3000   | C41—C46—C45   | 119 (2)    |
| O6—C6—H6B    | 109.3000   | C41—C46—H46   | 120.3000   |
| C5—C6—H6B    | 109.3000   | C45—C46—H46   | 120.3000   |
| H6A—C6—H6B   | 108.0000   | O4—C47—C41    | 108.8 (14) |
| N2—C2—C3     | 108.6 (13) | O4—C47—H47A   | 109.9000   |
| N2—C2—C1     | 108.4 (12) | C41—C47—H47A  | 109.9000   |
| C3—C2—C1     | 114.4 (12) | O4—C47—H47B   | 109.9000   |
| N2—C2—H2     | 108.4000   | C41—C47—H47B  | 109.9000   |
| C3—C2—H2     | 108.4000   | H47A—C47—H47B | 108.3000   |
| C1—C2—H2     | 108.4000   | C62—C61—C66   | 118 (2)    |
| N11—C12—C13  | 122.5 (15) | C62—C61—C67   | 122.3 (18) |
| N11—C12—C1   | 115.8 (14) | C66—C61—C67   | 119.2 (19) |
| C13—C12—C1   | 121.5 (14) | C61—C62—C63   | 121 (2)    |
| C12—C13—C14  | 121.3 (18) | C61—C62—H62   | 119.4000   |
| C12—C13—H13A | 119.3000   | C63—C62—H62   | 119.4000   |
| C14—C13—H13A | 119.3000   | C62—C63—C64   | 118 (2)    |
| C13—C14—C15  | 116.9 (18) | C62—C63—H63   | 120.8000   |
| C13—C14—H14A | 121.6000   | C64—C63—H63   | 120.8000   |
| C15—C14—H14A | 121.6000   | C65—C64—C63   | 120 (3)    |
| C16—C15—C14  | 119.1 (17) | C65—C64—H64   | 120.0000   |
| C16—C15—H15A | 120.5000   | C63—C64—H64   | 120.0000   |
| C14—C15—H15A | 120.5000   | C64—C65—C66   | 121 (3)    |
| C15—C16—N11  | 125.1 (16) | C64—C65—H65   | 119.3000   |
| C15—C16—H16A | 117.5000   | C66—C65—H65   | 119.3000   |
| N11—C16—H16A | 117.5000   | C65—C66—C61   | 120 (2)    |
| C22—C21—C26  | 118.1 (15) | C65—C66—H66   | 119.8000   |
| C22—C21—C27  | 120.1 (14) | C61—C66—H66   | 119.8000   |
| C26—C21—C27  | 121.8 (15) | C2—N2—Ru1     | 120.2 (10) |
| C22—C21—Ru1  | 71.6 (9)   | C2—N2—H2A     | 102 (10)   |
| C26—C21—Ru1  | 70.5 (9)   | Ru1—N2—H2A    | 100 (10)   |
| C27—C21—Ru1  | 131.4 (12) | C2—N2—H2B     | 114 (10)   |
| C21—C22—C23  | 121.9 (15) | Ru1—N2—H2B    | 82 (10)    |
| C21—C22—Ru1  | 71.6 (9)   | H2A—N2—H2B    | 137 (10)   |
| C23—C22—Ru1  | 71.0 (9)   | C12—N11—C16   | 115.1 (14) |

|               |            |               |            |
|---------------|------------|---------------|------------|
| C21—C22—H22   | 118.2000   | C12—N11—Ru1   | 126.6 (11) |
| C23—C22—H22   | 118.2000   | C16—N11—Ru1   | 118.2 (10) |
| Ru1—C22—H22   | 118.2000   | C3—O3—C37     | 113.5 (15) |
| C22—C23—C24   | 120.3 (15) | C47—O4—C4     | 111.6 (14) |
| C22—C23—Ru1   | 71.5 (9)   | C1—O5—C5      | 114.5 (11) |
| C24—C23—Ru1   | 72.0 (10)  | C6—O6—C67     | 113.9 (14) |
| C22—C23—H23   | 119.4000   | O6—C67—C61    | 115.2 (15) |
| C24—C23—H23   | 119.4000   | O6—C67—H67A   | 108.5000   |
| Ru1—C23—H23   | 119.4000   | C61—C67—H67A  | 108.5000   |
| C25—C24—C23   | 118.0 (16) | O6—C67—H67B   | 108.5000   |
| C25—C24—C30   | 121.3 (16) | C61—C67—H67B  | 108.5000   |
| C23—C24—C30   | 120.6 (17) | H67A—C67—H67B | 107.5000   |
| C25—C24—Ru1   | 69.9 (10)  | N11—Ru1—N2    | 87.3 (5)   |
| C23—C24—Ru1   | 69.8 (11)  | N11—Ru1—C25   | 115.6 (6)  |
| C30—C24—Ru1   | 128.1 (14) | N2—Ru1—C25    | 96.4 (6)   |
| C24—C25—C26   | 120.7 (15) | N11—Ru1—C26   | 153.8 (5)  |
| C24—C25—Ru1   | 73.3 (11)  | N2—Ru1—C26    | 91.8 (6)   |
| C26—C25—Ru1   | 70.8 (10)  | C25—Ru1—C26   | 38.5 (6)   |
| C24—C25—H25   | 119.2000   | N11—Ru1—C23   | 93.7 (6)   |
| C26—C25—H25   | 119.2000   | N2—Ru1—C23    | 162.6 (6)  |
| Ru1—C25—H25   | 119.2000   | C25—Ru1—C23   | 67.5 (6)   |
| C21—C26—C25   | 120.9 (15) | C26—Ru1—C23   | 79.7 (6)   |
| C21—C26—Ru1   | 71.9 (9)   | N11—Ru1—C22   | 121.4 (6)  |
| C25—C26—Ru1   | 70.6 (10)  | N2—Ru1—C22    | 149.9 (6)  |
| C21—C26—H26   | 118.9000   | C25—Ru1—C22   | 79.8 (6)   |
| C25—C26—H26   | 118.9000   | C26—Ru1—C22   | 66.6 (6)   |
| Ru1—C26—H26   | 118.9000   | C23—Ru1—C22   | 37.5 (6)   |
| C28—C27—C29   | 113.1 (19) | N11—Ru1—C21   | 158.2 (5)  |
| C28—C27—C21   | 108.2 (16) | N2—Ru1—C21    | 113.8 (5)  |
| C29—C27—C21   | 113.7 (14) | C25—Ru1—C21   | 69.0 (6)   |
| C28—C27—H27   | 107.2000   | C26—Ru1—C21   | 37.6 (5)   |
| C29—C27—H27   | 107.2000   | C23—Ru1—C21   | 67.8 (6)   |
| C21—C27—H27   | 107.2000   | C22—Ru1—C21   | 36.9 (6)   |
| C27—C28—H28A  | 109.5000   | N11—Ru1—C24   | 91.2 (6)   |
| C27—C28—H28B  | 109.5000   | N2—Ru1—C24    | 124.5 (6)  |
| H28A—C28—H28B | 109.5000   | C25—Ru1—C24   | 36.8 (7)   |
| C27—C28—H28C  | 109.5000   | C26—Ru1—C24   | 67.9 (7)   |
| H28A—C28—H28C | 109.5000   | C23—Ru1—C24   | 38.2 (5)   |
| H28B—C28—H28C | 109.5000   | C22—Ru1—C24   | 68.1 (6)   |
| C27—C29—H29A  | 109.5000   | C21—Ru1—C24   | 81.1 (6)   |

|               |             |                 |             |
|---------------|-------------|-----------------|-------------|
| C27—C29—H29B  | 109.5000    | N11—Ru1—Cl1     | 85.0 (4)    |
| H29A—C29—H29B | 109.5000    | N2—Ru1—Cl1      | 82.4 (4)    |
| C27—C29—H29C  | 109.5000    | C25—Ru1—Cl1     | 159.3 (5)   |
| H29A—C29—H29C | 109.5000    | C26—Ru1—Cl1     | 120.8 (5)   |
| H29B—C29—H29C | 109.5000    | C23—Ru1—Cl1     | 115.0 (5)   |
| C24—C30—H30A  | 109.5000    | C22—Ru1—Cl1     | 90.9 (5)    |
| C24—C30—H30B  | 109.5000    | C21—Ru1—Cl1     | 92.4 (4)    |
| H30A—C30—H30B | 109.5000    | C24—Ru1—Cl1     | 152.7 (5)   |
| C24—C30—H30C  | 109.5000    | F1—P1—F6        | 91.4 (13)   |
| H30A—C30—H30C | 109.5000    | F1—P1—F3        | 91.8 (12)   |
| H30B—C30—H30C | 109.5000    | F6—P1—F3        | 176.3 (12)  |
| C32—C31—C36   | 122 (2)     | F1—P1—F2        | 90.4 (10)   |
| C32—C31—C37   | 121 (2)     | F6—P1—F2        | 88.9 (9)    |
| C36—C31—C37   | 117 (2)     | F3—P1—F2        | 93.0 (10)   |
| C31—C32—C33   | 121 (2)     | F1—P1—F4        | 179.1 (13)  |
| C31—C32—H32   | 119.6000    | F6—P1—F4        | 89.5 (12)   |
| C33—C32—H32   | 119.6000    | F3—P1—F4        | 87.3 (12)   |
| C34—C33—C32   | 118 (3)     | F2—P1—F4        | 89.9 (9)    |
| C34—C33—H33   | 121.2000    | F1—P1—F5        | 92.7 (10)   |
| C32—C33—H33   | 121.2000    | F6—P1—F5        | 89.0 (9)    |
| C33—C34—C35   | 122 (3)     | F3—P1—F5        | 88.9 (9)    |
| C33—C34—H34   | 118.9000    | F2—P1—F5        | 176.3 (10)  |
| C35—C34—H34   | 118.9000    | F4—P1—F5        | 87.0 (8)    |
| C34—C35—C36   | 120 (2)     |                 |             |
|               |             |                 |             |
| O3—C3—C4—O4   | -65.5 (19)  | Ru1—C21—C27—C28 | 178.6 (14)  |
| C2—C3—C4—O4   | 177.6 (14)  | C22—C21—C27—C29 | 143.4 (19)  |
| O3—C3—C4—C5   | 176.6 (13)  | C26—C21—C27—C29 | -39 (3)     |
| C2—C3—C4—C5   | 59.7 (19)   | Ru1—C21—C27—C29 | 52 (2)      |
| O4—C4—C5—O5   | 173.5 (13)  | C36—C31—C32—C33 | 3 (3)       |
| C3—C4—C5—O5   | -68.9 (17)  | C37—C31—C32—C33 | -179.7 (18) |
| O4—C4—C5—C6   | 56 (2)      | C31—C32—C33—C34 | -3 (3)      |
| C3—C4—C5—C6   | 173.5 (15)  | C32—C33—C34—C35 | 3 (4)       |
| O5—C5—C6—O6   | -71.3 (17)  | C33—C34—C35—C36 | -3 (4)      |
| C4—C5—C6—O6   | 45 (2)      | C32—C31—C36—C35 | -3 (3)      |
| O3—C3—C2—N2   | 72.6 (16)   | C37—C31—C36—C35 | 179.6 (18)  |
| C4—C3—C2—N2   | -166.8 (14) | C34—C35—C36—C31 | 3 (3)       |
| O3—C3—C2—C1   | -166.1 (13) | C32—C31—C37—O3  | -106 (2)    |
| C4—C3—C2—C1   | -46 (2)     | C36—C31—C37—O3  | 71 (2)      |
| O5—C1—C2—N2   | 161.6 (13)  | C46—C41—C42—C43 | 1 (3)       |

|                 |             |                 |             |
|-----------------|-------------|-----------------|-------------|
| C12—C1—C2—N2    | -81.9 (16)  | C47—C41—C42—C43 | -178.1 (18) |
| O5—C1—C2—C3     | 40.2 (18)   | C41—C42—C43—C44 | -1 (3)      |
| C12—C1—C2—C3    | 156.7 (14)  | C42—C43—C44—C45 | 2 (3)       |
| O5—C1—C12—N11   | 176.6 (13)  | C43—C44—C45—C46 | -3 (3)      |
| C2—C1—C12—N11   | 55.8 (17)   | C42—C41—C46—C45 | -1 (3)      |
| O5—C1—C12—C13   | 2.9 (19)    | C47—C41—C46—C45 | 177.5 (18)  |
| C2—C1—C12—C13   | -118.0 (16) | C44—C45—C46—C41 | 2 (3)       |
| N11—C12—C13—C14 | 3 (3)       | C42—C41—C47—O4  | -46 (2)     |
| C1—C12—C13—C14  | 175.9 (15)  | C46—C41—C47—O4  | 134.7 (17)  |
| C12—C13—C14—C15 | -2 (3)      | C66—C61—C62—C63 | 3 (3)       |
| C13—C14—C15—C16 | 0 (3)       | C67—C61—C62—C63 | 180 (2)     |
| C14—C15—C16—N11 | 1 (3)       | C61—C62—C63—C64 | -3 (4)      |
| C26—C21—C22—C23 | 2 (2)       | C62—C63—C64—C65 | 2 (4)       |
| C27—C21—C22—C23 | 179.9 (16)  | C63—C64—C65—C66 | 0 (5)       |
| Ru1—C21—C22—C23 | -52.3 (15)  | C64—C65—C66—C61 | -1 (4)      |
| C26—C21—C22—Ru1 | 54.8 (14)   | C62—C61—C66—C65 | -1 (3)      |
| C27—C21—C22—Ru1 | -127.8 (15) | C67—C61—C66—C65 | -177 (2)    |
| C21—C22—C23—C24 | -3 (3)      | C3—C2—N2—Ru1    | 165.5 (10)  |
| Ru1—C22—C23—C24 | -55.1 (15)  | C1—C2—N2—Ru1    | 40.7 (16)   |
| C21—C22—C23—Ru1 | 52.5 (15)   | C13—C12—N11—C16 | -1 (2)      |
| C22—C23—C24—C25 | 2 (3)       | C1—C12—N11—C16  | -174.7 (12) |
| Ru1—C23—C24—C25 | -52.4 (15)  | C13—C12—N11—Ru1 | -177.2 (12) |
| C22—C23—C24—C30 | 178.0 (17)  | C1—C12—N11—Ru1  | 9.1 (19)    |
| Ru1—C23—C24—C30 | 123.2 (18)  | C15—C16—N11—C12 | -1 (2)      |
| C22—C23—C24—Ru1 | 54.9 (15)   | C15—C16—N11—Ru1 | 175.7 (14)  |
| C23—C24—C25—C26 | -2 (3)      | C4—C3—O3—C37    | 98.5 (17)   |
| C30—C24—C25—C26 | -177.9 (17) | C2—C3—O3—C37    | -142.2 (14) |
| Ru1—C24—C25—C26 | -54.7 (15)  | C31—C37—O3—C3   | 89 (2)      |
| C23—C24—C25—Ru1 | 52.4 (15)   | C41—C47—O4—C4   | -172.2 (14) |
| C30—C24—C25—Ru1 | -123.2 (18) | C3—C4—O4—C47    | 107.2 (17)  |
| C22—C21—C26—C25 | -2 (2)      | C5—C4—O4—C47    | -136.2 (16) |
| C27—C21—C26—C25 | -179.8 (15) | C12—C1—O5—C5    | -171.9 (12) |
| Ru1—C21—C26—C25 | 52.9 (15)   | C2—C1—O5—C5     | -52.2 (17)  |
| C22—C21—C26—Ru1 | -55.3 (14)  | C6—C5—O5—C1     | -170.4 (12) |
| C27—C21—C26—Ru1 | 127.3 (16)  | C4—C5—O5—C1     | 66.7 (17)   |
| C24—C25—C26—C21 | 2 (3)       | C5—C6—O6—C67    | 165.4 (14)  |
| Ru1—C25—C26—C21 | -53.5 (14)  | C6—O6—C67—C61   | 63 (2)      |
| C24—C25—C26—Ru1 | 55.9 (16)   | C62—C61—C67—O6  | 40 (3)      |
| C22—C21—C27—C28 | -90 (2)     | C66—C61—C67—O6  | -143.6 (19) |
| C26—C21—C27—C28 | 87 (2)      |                 |             |

## 5. References (the number of the reference list of the main text is given in parenthesis)

- 1.(80.) Sheldrick, G., A short history of SHELX. *Acta Crystallogr. A* **2008**, *64*, 112-122, Doi: 10.1107/S0108767307043930.
- 2.(81.) Westrip, S., publCIF: software for editing, validating and formatting crystallographic information files. *J. Appl. Cryst.* **2010**, *43*, 920-925, Doi: 10.1107/S0021889810022120.
- 3.(82.) Macrae, C. F.; Edgington, P. R.; McCabe, P.; Pidcock, E.; Shields, G. P.; Taylor, R.; Towler, M.; van de Streek, J., Mercury: visualization and analysis of crystal structures. *J. Appl. Cryst.* **2006**, *39*, 453-457, Doi: 10.1107/S002188980600731X.
- 4.(83.) Spek, A., Single-crystal structure validation with the program PLATON. *J. Appl. Cryst.* **2003**, *36*, 7-13, Doi: 10.1107/S0021889802022112.
- 5.(59.) Parsons, S.; Flack, H. D.; Wagner, T., Use of intensity quotients and differences in absolute structure refinement. *Acta Crystallogr. B* **2013**, *69*, 249-259, Doi: 10.1107/s2052519213010014.
