# Supplementary material for: Half-Sandwich Type Platinum-Group Metal Complexes of C-Glucosaminyl Azines: Synthesis and Antineoplastic and Antimicrobial Activities
Source: MDPI journal article supplement (doi:10.3390/molecules28073058), 2023-03-29
Supplement: s1 [file s1]

## checkCIF/PLATON report

Structure factors have been supplied for datablock(s) Ru\_3a

THIS REPORT IS FOR GUIDANCE ONLY. IF USED AS PART OF A REVIEW PROCEDURE FOR PUBLICATION, IT SHOULD NOT REPLACE THE EXPERTISE OF AN EXPERIENCED CRYSTALLOGRAPHIC REFEREE.

No syntax errors found.      CIF dictionary      Interpreting this report

### Datablock: Ru\_3a

---

|                        |                           |                          |                |
|------------------------|---------------------------|--------------------------|----------------|
| Bond precision:        | C-C = 0.0310 A            | Wavelength=0.71073       |                |
| Cell:                  | a=11.6071 (16)            | b=16.655 (2)             | c=11.7541 (19) |
|                        | alpha=90                  | beta=113.396 (3)         | gamma=90       |
| Temperature:           | 294 K                     |                          |                |
|                        | Calculated                | Reported                 |                |
| Volume                 | 2085.4 (5)                | 2085.4 (5)               |                |
| Space group            | P 21                      | P 1 21 1                 |                |
| Hall group             | P 2yb                     | P 2yb                    |                |
| Moiety formula         | C42 H48 Cl N2 O4 Ru, F6 P | C42 H48 Cl F6 N2 O4 P Ru |                |
| Sum formula            | C42 H48 Cl F6 N2 O4 P Ru  | C42 H48 Cl F6 N2 O4 P Ru |                |
| Mr                     | 926.31                    | 926.31                   |                |
| Dx, g cm <sup>-3</sup> | 1.475                     | 1.475                    |                |
| Z                      | 2                         | 2                        |                |
| Mu (mm <sup>-1</sup> ) | 0.548                     | 0.548                    |                |
| F000                   | 952.0                     | 952.0                    |                |
| F000'                  | 950.46                    |                          |                |
| h, k, lmax             | 13, 20, 14                | 13, 20, 14               |                |
| Nref                   | 7650 [ 3968]              | 7605                     |                |
| Tmin, Tmax             | 0.868, 0.972              | 0.870, 0.970             |                |
| Tmin'                  | 0.868                     |                          |                |

Correction method= # Reported T Limits: Tmin=0.870 Tmax=0.970  
AbsCorr = MULTI-SCAN

Data completeness= 1.92/0.99      Theta(max)= 25.370

|                                |                   |
|--------------------------------|-------------------|
| R(reflections)= 0.0826 ( 4883) | wR2(reflections)= |
| S = 1.065                      | 0.1847 ( 7605)    |
| Npar= 524                      |                   |

---

The following ALERTS were generated. Each ALERT has the format

**test-name\_ALERT\_alert-type\_alert-level.**

Click on the hyperlinks for more details of the test.

---

 **Alert level B**

PLAT342\_ALERT\_3\_B Low Bond Precision on C-C Bonds ..... 0.03098 Ang.

**Author Response: This error is probably related to the combined effect of the highly irregular plate morphology of the crystal (absorption) as well as the presence of heavy element Ru. The structure is considered to be correct and no attempt was made to smash the error.**

---

 **Alert level C**

RINTA01\_ALERT\_3\_C The value of Rint is greater than 0.12

Rint given 0.171

|                   |                                                  |       |              |
|-------------------|--------------------------------------------------|-------|--------------|
| PLAT020_ALERT_3_C | The Value of Rint is Greater Than 0.12 .....     | 0.171 | Report       |
| PLAT031_ALERT_4_C | Refined Extinction Parameter Within Range of ... | 3.143 | Sigma        |
| PLAT042_ALERT_1_C | Calc. and Reported MoietyFormula Strings Differ  |       | Please Check |
| PLAT090_ALERT_3_C | Poor Data / Parameter Ratio (Zmax > 18) .....    | 7.54  | Note         |
| PLAT241_ALERT_2_C | High 'MainMol' Ueq as Compared to Neighbors of   | C34   | Check        |
| PLAT241_ALERT_2_C | High 'MainMol' Ueq as Compared to Neighbors of   | C37   | Check        |
| PLAT241_ALERT_2_C | High 'MainMol' Ueq as Compared to Neighbors of   | C65   | Check        |
| PLAT242_ALERT_2_C | Low 'MainMol' Ueq as Compared to Neighbors of    | C31   | Check        |
| PLAT242_ALERT_2_C | Low 'MainMol' Ueq as Compared to Neighbors of    | C41   | Check        |
| PLAT260_ALERT_2_C | Large Average Ueq of Residue Including P1        | 0.141 | Check        |
| PLAT911_ALERT_3_C | Missing FCF Refl Between Thmin & STh/L= 0.600    | 5     | Report       |
| PLAT973_ALERT_2_C | Check Calcd Positive Resid. Density on Ru1       | 1.13  | eA-3         |

---

 **Alert level G**

|                   |                                                  |      |        |
|-------------------|--------------------------------------------------|------|--------|
| PLAT002_ALERT_2_G | Number of Distance or Angle Restraints on AtSite | 3    | Note   |
| PLAT066_ALERT_1_G | Predicted and Reported Tmin&Tmax Range Identical | ?    | Check  |
| PLAT083_ALERT_2_G | SHELXL Second Parameter in WGHT Unusually Large  | 9.49 | Why ?  |
| PLAT172_ALERT_4_G | The CIF-Embedded .res File Contains DFIX Records | 1    | Report |
| PLAT244_ALERT_4_G | Low 'Solvent' Ueq as Compared to Neighbors of    | P1   | Check  |
| PLAT303_ALERT_2_G | Full Occupancy Atom H2B with # Connections       | 2.00 | Check  |
| PLAT480_ALERT_4_G | Long H...A H-Bond Reported H47A ..CL1 .          | 2.93 | Ang.   |
| PLAT480_ALERT_4_G | Long H...A H-Bond Reported H67B ..CL1 .          | 2.92 | Ang.   |
| PLAT480_ALERT_4_G | Long H...A H-Bond Reported H2B ..F5 .            | 2.56 | Ang.   |
| PLAT721_ALERT_1_G | Bond Calc 0.97000, Rep 0.96000 Dev...            | 0.01 | Ang.   |
|                   | C28 -H28B 1_555 1_555 ..... #                    | 52   | Check  |
| PLAT791_ALERT_4_G | Model has Chirality at C1 (Sohnke SpGr)          | R    | Verify |
| PLAT791_ALERT_4_G | Model has Chirality at C2 (Sohnke SpGr)          | S    | Verify |
| PLAT791_ALERT_4_G | Model has Chirality at C3 (Sohnke SpGr)          | R    | Verify |
| PLAT791_ALERT_4_G | Model has Chirality at C4 (Sohnke SpGr)          | S    | Verify |
| PLAT791_ALERT_4_G | Model has Chirality at C5 (Sohnke SpGr)          | R    | Verify |
| PLAT860_ALERT_3_G | Number of Least-Squares Restraints .....         | 3    | Note   |
| PLAT912_ALERT_4_G | Missing # of FCF Reflections Above STh/L= 0.600  | 15   | Note   |
| PLAT978_ALERT_2_G | Number C-C Bonds with Positive Residual Density. | 0    | Info   |

---

|    |                      |                                                              |
|----|----------------------|--------------------------------------------------------------|
| 0  | <b>ALERT level A</b> | = Most likely a serious problem - resolve or explain         |
| 1  | <b>ALERT level B</b> | = A potentially serious problem, consider carefully          |
| 13 | <b>ALERT level C</b> | = Check. Ensure it is not caused by an omission or oversight |
| 18 | <b>ALERT level G</b> | = General information/check it is not something unexpected   |
|    |                      |                                                              |
| 3  | ALERT type 1         | CIF construction/syntax error, inconsistent or missing data  |
| 11 | ALERT type 2         | Indicator that the structure model may be wrong or deficient |
| 6  | ALERT type 3         | Indicator that the structure quality may be low              |
| 12 | ALERT type 4         | Improvement, methodology, query or suggestion                |
| 0  | ALERT type 5         | Informative message, check                                   |

---

It is advisable to attempt to resolve as many as possible of the alerts in all categories. Often the minor alerts point to easily fixed oversights, errors and omissions in your CIF or refinement strategy, so attention to these fine details can be worthwhile. In order to resolve some of the more serious problems it may be necessary to carry out additional measurements or structure refinements. However, the purpose of your study may justify the reported deviations and the more serious of these should normally be commented upon in the discussion or experimental section of a paper or in the "special\_details" fields of the CIF. checkCIF was carefully designed to identify outliers and unusual parameters, but every test has its limitations and alerts that are not important in a particular case may appear. Conversely, the absence of alerts does not guarantee there are no aspects of the results needing attention. It is up to the individual to critically assess their own results and, if necessary, seek expert advice.

### **Publication of your CIF in IUCr journals**

A basic structural check has been run on your CIF. These basic checks will be run on all CIFs submitted for publication in IUCr journals (*Acta Crystallographica*, *Journal of Applied Crystallography*, *Journal of Synchrotron Radiation*); however, if you intend to submit to *Acta Crystallographica Section C* or *E* or *IUCrData*, you should make sure that full publication checks are run on the final version of your CIF prior to submission.

### **Publication of your CIF in other journals**

Please refer to the *Notes for Authors* of the relevant journal for any special instructions relating to CIF submission.
