# Supplementary material for: Half-Sandwich Type Platinum-Group Metal Complexes of C-Glucosaminyl Azines: Synthesis and Antineoplastic and Antimicrobial Activities
Source: Molecules. 2023 Mar 29;28(7):3058. doi: 10.3390/molecules28073058 (PMC10096180; doi:10.3390/molecules28073058)
Supplement: Supplementary file 1 [file molecules-28-03058-s001.zip › Kacsiretal.cif]

data_global
# start Validation Reply Form
_vrf_PLAT342_Ru_3a
;
PROBLEM: Low Bond Precision on C-C Bonds ............... 0.03098 Ang.
RESPONSE: This error is probably related to the combined effect of the 
highly irregular
plate morphology of the crystal (absorption) as well asthe presence 
of heavy element Ru. The structure is considered to be correct and 
no attempt was made to smash the error.
;
# end Validation Reply Form
_publ_section_related_literature ?

_publ_contact_letter 
;
Please consider this CIF as a supplement to our publication. 
I certify that
 this
 contibution
 is
 the
original work of those listed as authors; that it has not been published
before (in any language or medium) and is not being considered for publication
elsewhere; that all authors concur with and are aware of the submission; that
all workers involved in the study are listed as authors or given proper credit
in the acknowledgements; that I have obtained permission for and acknowledged
the source of any excerpts from other copyright works; and that to the best of
my knowledge the paper contains no statements which are libellous, unlawful or
in any way actionable. All coauthors have made significant scientific
contributions to the work reported, including the ideas and their execution,
and share responsibility and accountability for the results.
;


_publ_requested_category ?

# Loop of author details

loop_
_publ_author_name
_publ_author_address
_publ_author_footnote
_publ_author_email
'Kacsir, Istvan'
;
Department of Organic Chemistry, University of Debrecen, Debrecen, Hungary
Doctoral School of Chemistry, University of Debrecen, Debrecen,
Hungary
;
.
.
'Sipos, Adrienn'
;
Department of Medical Chemistry, Faculty of Medicine, University of Debrecen,
Debrecen, Hungary
The Hungarian Academy of Sciences, Center of Excellence, Hungary
MTA-DE Cell Biology and Signaling Research Group ELKH, Debrecen,
Hungary
;
.
.
'Major, Evelin'
;
Department of Metagenomics, University of Debrecen, Debrecen,
Hungary
;
.
.
'Bajusz, Nikolett'
;
Department of Metagenomics, University of Debrecen, Debrecen,
Hungary
;
.
.
'Benyei, Attila'
;
Department of Physical Chemistry, University of Debrecen, Egyetem t\'er 1.,
H-4032, Debrecen,
Hungary
;
.
?
'Buglyo, Peter'
;
Department of Inorganic & Analytical Chemistry, Faculty of Sciences and
Technology, University of Debrecen, Debrecen, 
Hungary
;
.
.
'Somsak, Laszlo'
;
Department of Organic Chemistry, University of Debrecen, Debrecen, 
Hungary
;
.
.
'Kardos, Gabor'
;
Department of Metagenomics, University of Debrecen, Debrecen,
Hungary
;
.
.
'Bai, Peter'
;
Department of Medical Chemistry, Faculty of Medicine, University of Debrecen,
Debrecen, Hungary
The Hungarian Academy of Sciences, Center of Excellence, Hungary
MTA-DE Cell Biology and Signaling Research Group ELKH, Debrecen, Hungary
NKFIH-DE Lend�let Laboratory of Cellular Metabolism, Debrecen, Hungary
Research Center for Molecular Medicine, Faculty of Medicine, University of
Debrecen, Debrecen, 
Hungary
;
.
.
'Bokor, Eva'
;
Department of Organic Chemistry, University of Debrecen, Debrecen, 
Hungary
;
.
.


_audit_update_record
;
2023-01-12 # Formatted by publCIF

;
_publcif_datablock.id '{a3207aeb-2b8c-427c-a247-a6c3c0ee0562}'

# publcif _publ_body_element loop start
loop_
_publ_body_element
_publ_body_title
_publ_body_contents

 section 
;
Introduction
; 
;

;
 section 
;
Experimental
; 
;

;
 subsection 
;
Synthesis and crystallization
; 
;

;
 subsection 
;
Refinement
;
;
Crystal data, data collection and structure refinement details are summarized
in Table 1.
;

 section 
;
Results and discussion
; 
;

;
# publcif _publ_body_element loop end
_audit_creation_method                  'APEX4 v2022.1-1'

_publ_requested_journal                 ?

_publ_contact_author_name               'Attila Benyei'
_publ_contact_author_address            

;
Department of Physical Chemistry, University of Debrecen, Egyetem t\'er 1.,
H-4032, Debrecen, 
Hungary
;

_publ_contact_author_email              ?
_publ_contact_author_fax                ?
_publ_contact_author_phone              ?

_publ_section_title                     
;
Half-sandwich type platinum-group metal complexes of <i>C</i>-glucosaminyl
azines: syntheses, antineoplastic and antimicrobial activities
;
_publ_section_abstract                  
;
(type here to add)
;
_publ_section_references                
;
(type here to add)
;

data_Ru_3a
_publcif_datablock.id '{d26d6c8a-a9b5-416d-a7ce-dad270bf3b24}'

_chemical_name_systematic               ?
_chemical_name_common                   ?
_chemical_formula_moiety                'C42 H48 Cl F6 N2 O4 P Ru'
_chemical_formula_sum                   'C42 H48 Cl F6 N2 O4 P Ru'
_chemical_formula_iupac                 ?
_chemical_formula_weight                926.31
_chemical_absolute_configuration        ad

_chemical_melting_point                 ?

_space_group_crystal_system             monoclinic
_space_group_IT_number                  4
_space_group_name_H-M_alt               'P 1 21 1'
_space_group_name_Hall                  'P 2yb'
loop_
    _space_group_symop_operation_xyz
    'x, y, z'
    '-x, y+1/2, -z'

_cell_length_a                          11.6071(16)
_cell_length_b                          16.655(2)
_cell_length_c                          11.7541(19)
_cell_angle_alpha                       90
_cell_angle_beta                        113.396(3)
_cell_angle_gamma                       90
_cell_volume                            2085.4(5)
_cell_formula_units_Z                   2
_cell_measurement_reflns_used           2698
_cell_measurement_theta_min             2.2493
_cell_measurement_theta_max             20.1848
_cell_measurement_temperature           294.(2)

_exptl_crystal_description              prism
_exptl_crystal_colour                   yellow
_exptl_crystal_size_max                 0.259
_exptl_crystal_size_mid                 0.236
_exptl_crystal_size_min                 0.052
_exptl_crystal_density_diffrn           1.475
_exptl_crystal_density_meas             ?
_exptl_crystal_density_method           'not measured'
_exptl_crystal_F_000                    952

_exptl_absorpt_coefficient_mu           0.548
_exptl_absorpt_correction_type          multi-scan
_exptl_absorpt_process_details          
;
SADABS-2016/2 - Bruker AXS area detector scaling and absorption correction
;
_exptl_absorpt_correction_T_min         0.87
_exptl_absorpt_correction_T_max         0.97

_exptl_special_details                  
;
; 

_diffrn_ambient_temperature             294.(2)

_diffrn_source                          'microfocus sealed tube'
_diffrn_source_type                     'INCOATEC I\mS 3.0'
_diffrn_source_power                    ?
_diffrn_source_current                  ?
_diffrn_source_voltage                  50

_diffrn_radiation_probe                 x-ray
_diffrn_radiation_type                  ' Mo K\a'
_diffrn_radiation_wavelength            0.71073
_diffrn_radiation_monochromator         'multilayer mirror'

_diffrn_measurement_device              ?
_diffrn_measurement_device_type         'Bruker D8 VENTURE'
_diffrn_measurement_method              '\w and \p scan'

_diffrn_detector_area_resol_mean        ?

_diffrn_reflns_number                   36696
_diffrn_reflns_av_R_equivalents         0.1710
_diffrn_reflns_av_unetI/netI            0.1395
_diffrn_reflns_theta_min                1.89
_diffrn_reflns_theta_max                25.37
_diffrn_reflns_theta_full               25.24
_diffrn_measured_fraction_theta_max     0.995
_diffrn_measured_fraction_theta_full    0.995
_diffrn_reflns_limit_h_min              -13
_diffrn_reflns_limit_h_max              13
_diffrn_reflns_limit_k_min              -19
_diffrn_reflns_limit_k_max              20
_diffrn_reflns_limit_l_min              -14
_diffrn_reflns_limit_l_max              14

_refine_special_details                 
;
;

_reflns_number_total                    7605
_reflns_number_gt                       4883
_reflns_threshold_expression            'I > 2\s(I)'
_reflns_Friedel_coverage                0.925
_reflns_Friedel_fraction_max            0.992
_reflns_Friedel_fraction_full           0.997

_refine_ls_structure_factor_coef        Fsqd
_refine_ls_matrix_type                  full
_refine_ls_R_factor_all                 0.1504
_refine_ls_R_factor_gt                  0.0826
_refine_ls_wR_factor_gt                 0.1483
_refine_ls_wR_factor_ref                0.1847
_refine_ls_goodness_of_fit_ref          1.065
_refine_ls_restrained_S_all             1.065
_refine_ls_number_reflns                7605
_refine_ls_number_parameters            524
_refine_ls_number_restraints            3
_refine_ls_number_constraints           ?
_refine_ls_hydrogen_treatment           mixed
_refine_ls_weighting_scheme             calc
_refine_ls_weighting_details            
    'w=1/[\s^2^(Fo^2^)+(0.0270P)^2^+9.4947P] where P=(Fo^2^+2Fc^2^)/3'

_atom_sites_solution_hydrogens          mixed
_atom_sites_solution_primary            direct
_atom_sites_solution_secondary          difmap

_refine_ls_shift/su_max                 0.000
_refine_ls_shift/su_mean                0.000
_refine_diff_density_max                0.586
_refine_diff_density_min                -0.781
_refine_ls_extinction_method            'SHELXL-2019/1 (Sheldrick 2019)'
_refine_ls_extinction_coef              0.0022(7)
_refine_ls_abs_structure_details        
;

Flack x determined using 1527 quotients [(I+)-(I-)]/[(I+)+(I-)]
(Parsons, Flack and Wagner, Acta Cryst. B69 (2013) 249-259).
;
_refine_ls_abs_structure_Flack          0.05(5)

loop_
    _atom_type_symbol
    _atom_type_description
    _atom_type_scat_dispersion_real
    _atom_type_scat_dispersion_imag
    _atom_type_scat_source
    C C 0.0033 0.0016 'International Tables Vol C Tables 4.2.6.8 and 6.1.1.4'
    H H 0.0000 0.0000 'International Tables Vol C Tables 4.2.6.8 and 6.1.1.4'
    N N 0.0061 0.0033 'International Tables Vol C Tables 4.2.6.8 and 6.1.1.4'
    O O 0.0106 0.0060 'International Tables Vol C Tables 4.2.6.8 and 6.1.1.4'
    F F 0.0171 0.0103 'International Tables Vol C Tables 4.2.6.8 and 6.1.1.4'
    Cl Cl 0.1484 0.1585
     'International Tables Vol C Tables 4.2.6.8 and 6.1.1.4'
    Ru Ru -1.2594 0.8363
     'International Tables Vol C Tables 4.2.6.8 and 6.1.1.4'
    P P 0.1023 0.0942 'International Tables Vol C Tables 4.2.6.8 and 6.1.1.4'

_computing_data_collection              'Bruker Instrument Service vV6.2.6'
_computing_cell_refinement              'APEX4 v2021.4-0 (Bruker AXS)'
_computing_data_reduction               'SAINT V8.38A (Bruker AXS Inc., 2019)'
_computing_structure_solution           'SHELXT 2014/5 (Sheldrick, 2014)'
_computing_structure_refinement         'SHELXL-2019/1 (Sheldrick, 2019)'
_computing_molecular_graphics           Mercury
_computing_publication_material         'WinGX, PublCIF'

loop_
    _atom_site_type_symbol
    _atom_site_label
    _atom_site_fract_x
    _atom_site_fract_y
    _atom_site_fract_z
    _atom_site_U_iso_or_equiv
    _atom_site_adp_type
    _atom_site_calc_flag
    _atom_site_refinement_flags_adp
    _atom_site_refinement_flags_occupancy
    _atom_site_refinement_flags_posn
    _atom_site_occupancy
    _atom_site_disorder_assembly
    _atom_site_disorder_group
    C C1 0.5019(14) 0.4408(8) 0.7232(15) 0.039(4) Uani d . . . 1 . .
    H H1A 0.472081 0.440989 0.632673 0.046000 Uiso calc U . R 1 . .
    C C3 0.2963(14) 0.4535(8) 0.7563(16) 0.042(4) Uani d . . . 1 . .
    H H3 0.237773 0.461036 0.669942 0.051000 Uiso calc U . R 1 . .
    C C4 0.3468(18) 0.5341(10) 0.815(2) 0.053(5) Uani d . . . 1 . .
    H H4 0.403383 0.527434 0.901895 0.064000 Uiso calc U . R 1 . .
    C C5 0.4170(16) 0.5710(9) 0.7408(16) 0.045(4) Uani d . . . 1 . .
    H H5 0.364354 0.568286 0.651916 0.054000 Uiso calc U . R 1 . .
    C C6 0.4619(18) 0.6555(9) 0.7760(17) 0.056(5) Uani d . . . 1 . .
    H H6A 0.521725 0.669170 0.740407 0.067000 Uiso calc U . R 1 . .
    H H6B 0.391274 0.692028 0.742104 0.067000 Uiso calc U . R 1 . .
    C C2 0.4047(14) 0.3995(8) 0.7619(16) 0.043(4) Uani d . . . 1 . .
    H H2 0.447591 0.379882 0.847052 0.052000 Uiso calc U . R 1 . .
    C C12 0.6270(14) 0.3977(9) 0.7795(14) 0.041(4) Uani d . . . 1 . .
    C C13 0.7318(16) 0.4353(11) 0.8604(15) 0.054(5) Uani d . . . 1 . .
    H H13A 0.727827 0.489481 0.877467 0.065000 Uiso calc U . R 1 . .
    C C14 0.8434(18) 0.3946(13) 0.9173(19) 0.069(6) Uani d . . . 1 . .
    H H14A 0.915835 0.420472 0.970410 0.083000 Uiso calc U . R 1 . .
    C C15 0.8428(16) 0.3134(12) 0.8918(17) 0.061(5) Uani d . . . 1 . .
    H H15A 0.915433 0.282993 0.928093 0.073000 Uiso calc U . R 1 . .
    C C16 0.7352(14) 0.2791(9) 0.8134(14) 0.049(4) Uani d . . . 1 . .
    H H16A 0.736742 0.224296 0.798861 0.059000 Uiso calc U . R 1 . .
    C C21 0.3754(15) 0.1576(9) 0.4992(15) 0.043(4) Uani d . . . 1 . .
    C C22 0.5030(16) 0.1450(9) 0.5384(16) 0.052(4) Uani d . . . 1 . .
    H H22 0.539794 0.098232 0.590812 0.062000 Uiso calc U . R 1 . .
    C C23 0.5841(17) 0.2051(10) 0.5305(16) 0.046(4) Uani d . . . 1 . .
    H H23 0.674911 0.198440 0.575425 0.056000 Uiso calc U . R 1 . .
    C C24 0.5351(18) 0.2813(9) 0.4760(18) 0.054(5) Uani d . . . 1 . .
    C C25 0.4077(18) 0.2942(10) 0.4366(16) 0.056(5) Uani d . . . 1 . .
    H H25 0.374726 0.348835 0.415904 0.068000 Uiso calc U . R 1 . .
    C C26 0.3268(16) 0.2321(9) 0.4458(15) 0.050(5) Uani d . . . 1 . .
    H H26 0.240028 0.245637 0.431707 0.061000 Uiso calc U . R 1 . .
    C C27 0.2903(18) 0.0901(9) 0.510(2) 0.062(5) Uani d . . . 1 . .
    H H27 0.342591 0.054382 0.576405 0.075000 Uiso calc U . R 1 . .
    C C28 0.246(2) 0.0427(12) 0.393(2) 0.087(8) Uani d . . . 1 . .
    H H28A 0.211934 -0.007400 0.404861 0.131000 Uiso calc U . R 1 . .
    H H28B 0.315816 0.032480 0.369892 0.131000 Uiso calc U . R 1 . .
    H H28C 0.183000 0.072394 0.327817 0.131000 Uiso calc U . R 1 . .
    C C29 0.184(2) 0.1191(13) 0.543(2) 0.094(8) Uani d . . . 1 . .
    H H29A 0.140110 0.073777 0.556596 0.141000 Uiso calc U . R 1 . .
    H H29B 0.127029 0.150990 0.476121 0.141000 Uiso calc U . R 1 . .
    H H29C 0.217419 0.151036 0.616813 0.141000 Uiso calc U . R 1 . .
    C C30 0.621(2) 0.3465(11) 0.471(2) 0.083(7) Uani d . . . 1 . .
    H H30A 0.635936 0.341105 0.396502 0.125000 Uiso calc U . R 1 . .
    H H30B 0.699386 0.342562 0.541702 0.125000 Uiso calc U . R 1 . .
    H H30C 0.583413 0.397746 0.471200 0.125000 Uiso calc U . R 1 . .
    C C31 0.0351(16) 0.3568(11) 0.674(2) 0.062(5) Uani d . . . 1 . .
    C C32 -0.0143(18) 0.3743(13) 0.554(2) 0.075(6) Uani d . . . 1 . .
    H H32 -0.007817 0.426231 0.528072 0.090000 Uiso calc U . R 1 . .
    C C33 -0.077(2) 0.3140(19) 0.463(3) 0.108(9) Uani d . . . 1 . .
    H H33 -0.115352 0.326473 0.379480 0.129000 Uiso calc U . R 1 . .
    C C34 -0.080(3) 0.2392(19) 0.504(4) 0.117(11) Uani d . . . 1 . .
    H H34 -0.117497 0.198906 0.446434 0.140000 Uiso calc U . R 1 . .
    C C35 -0.029(2) 0.2200(14) 0.629(3) 0.093(9) Uani d . . . 1 . .
    H H35 -0.034812 0.167910 0.654122 0.112000 Uiso calc U . R 1 . .
    C C36 0.034(2) 0.2799(12) 0.717(3) 0.085(8) Uani d . . . 1 . .
    H H36 0.072323 0.267866 0.800885 0.102000 Uiso calc U . R 1 . .
    C C37 0.1008(16) 0.4200(13) 0.769(2) 0.085(7) Uani d . . . 1 . .
    H H37A 0.079603 0.472411 0.730236 0.102000 Uiso calc U . R 1 . .
    H H37B 0.069900 0.417646 0.834398 0.102000 Uiso calc U . R 1 . .
    C C41 0.1126(15) 0.6395(9) 0.8976(15) 0.046(4) Uani d . . . 1 . .
    C C42 0.0805(17) 0.7048(11) 0.8255(18) 0.063(5) Uani d . . . 1 . .
    H H42 0.132800 0.721238 0.787123 0.075000 Uiso calc U . R 1 . .
    C C43 -0.0249(17) 0.7484(19) 0.8056(18) 0.081(5) Uani d . . . 1 . .
    H H43 -0.042881 0.794018 0.755851 0.097000 Uiso calc U . R 1 . .
    C C44 -0.1039(19) 0.7245(15) 0.860(2) 0.089(8) Uani d . . . 1 . .
    H H44 -0.177360 0.753104 0.844323 0.106000 Uiso calc U . R 1 . .
    C C45 -0.076(2) 0.6576(15) 0.937(2) 0.091(7) Uani d . . . 1 . .
    H H45 -0.127749 0.642454 0.976853 0.109000 Uiso calc U . R 1 . .
    C C46 0.034(2) 0.6134(12) 0.9549(19) 0.074(6) Uani d . . . 1 . .
    H H46 0.053879 0.567460 1.003849 0.089000 Uiso calc U . R 1 . .
    C C47 0.2332(17) 0.5954(11) 0.9188(17) 0.061(5) Uani d . . . 1 . .
    H H47A 0.304433 0.625916 0.974535 0.073000 Uiso calc U . R 1 . .
    H H47B 0.233205 0.543486 0.956296 0.073000 Uiso calc U . R 1 . .
    C C61 0.515(2) 0.8129(11) 0.9034(19) 0.059(6) Uani d . . . 1 . .
    C C62 0.397(2) 0.8212(11) 0.905(2) 0.075(6) Uani d . . . 1 . .
    H H62 0.362077 0.778244 0.930275 0.090000 Uiso calc U . R 1 . .
    C C63 0.331(2) 0.8922(18) 0.870(2) 0.100(8) Uani d . . . 1 . .
    H H63 0.249879 0.896367 0.866821 0.119000 Uiso calc U . R 1 . .
    C C64 0.388(4) 0.9574(16) 0.839(3) 0.112(12) Uani d . . . 1 . .
    H H64 0.346500 1.006298 0.817454 0.134000 Uiso calc U . R 1 . .
    C C65 0.504(3) 0.9495(16) 0.840(3) 0.113(10) Uani d . . . 1 . .
    H H65 0.541801 0.993250 0.818681 0.136000 Uiso calc U . R 1 . .
    C C66 0.568(2) 0.8788(12) 0.870(2) 0.078(6) Uani d . . . 1 . .
    H H66 0.647467 0.874629 0.869484 0.094000 Uiso calc U . R 1 . .
    N N2 0.3526(14) 0.3296(8) 0.6795(14) 0.049(4) Uani d . . D 1 . .
    N N11 0.6247(12) 0.3184(7) 0.7540(13) 0.049(4) Uani d . . . 1 . .
    O O3 0.2350(11) 0.4118(7) 0.8231(12) 0.060(3) Uani d . . . 1 . .
    O O4 0.2428(11) 0.5850(7) 0.8036(11) 0.056(3) Uani d . . . 1 . .
    O O5 0.5277(10) 0.5210(6) 0.7693(11) 0.049(3) Uani d . . . 1 . .
    O O6 0.5179(14) 0.6650(8) 0.9033(13) 0.063(4) Uani d . . . 1 . .
    C C67 0.5890(17) 0.7372(10) 0.9419(19) 0.063(5) Uani d . . . 1 . .
    H H67A 0.653348 0.737506 0.908719 0.076000 Uiso calc U . R 1 . .
    H H67B 0.631092 0.736748 1.031554 0.076000 Uiso calc U . R 1 . .
    F F1 0.0320(13) 0.4908(12) 0.264(2) 0.175(8) Uani d . . . 1 . .
    F F2 0.1826(16) 0.5713(8) 0.2701(16) 0.135(6) Uani d . . . 1 . .
    F F3 0.188(2) 0.4392(10) 0.2272(18) 0.155(7) Uani d . . . 1 . .
    F F4 0.3196(14) 0.4869(9) 0.401(2) 0.163(9) Uani d . . . 1 . .
    F F5 0.1701(13) 0.4078(7) 0.4020(15) 0.108(5) Uani d . . . 1 . .
    F F6 0.165(2) 0.5365(9) 0.4406(16) 0.181(9) Uani d . . . 1 . .
    Cl Cl1 0.4831(5) 0.1791(3) 0.8023(4) 0.0637(13) Uani d . . . 1 . .
    Ru Ru1 0.47376(11) 0.25395(6) 0.62700(11) 0.0422(4) Uani d . . . 1 . .
    P P1 0.1726(5) 0.4895(3) 0.3316(6) 0.0713(16) Uani d . . . 1 . .
    H H2A 0.334(18) 0.297(9) 0.727(15) 0.086000 Uiso d U . D 1 . .
    H H2B 0.322(17) 0.341(12) 0.601(5) 0.086000 Uiso d U . D 1 . .

loop_
    _atom_site_aniso_label
    _atom_site_aniso_U_11
    _atom_site_aniso_U_22
    _atom_site_aniso_U_33
    _atom_site_aniso_U_12
    _atom_site_aniso_U_13
    _atom_site_aniso_U_23
    C1 0.045(9) 0.033(8) 0.048(10) 0.002(7) 0.028(8) 0.001(7)
    C3 0.039(8) 0.038(8) 0.056(11) 0.004(7) 0.025(8) -0.005(7)
    C4 0.060(11) 0.035(9) 0.066(14) 0.012(8) 0.027(11) -0.010(8)
    C5 0.056(10) 0.039(8) 0.043(10) 0.004(7) 0.024(9) 0.001(7)
    C6 0.084(14) 0.041(9) 0.050(12) 0.006(9) 0.034(11) 0.003(8)
    C2 0.053(10) 0.037(8) 0.048(11) 0.001(7) 0.029(9) -0.005(7)
    C12 0.045(9) 0.057(10) 0.020(9) 0.008(8) 0.011(8) 0.005(7)
    C13 0.050(11) 0.069(11) 0.026(10) -0.007(9) -0.004(9) -0.001(8)
    C14 0.053(12) 0.088(15) 0.059(14) -0.016(11) 0.015(11) 0.010(11)
    C15 0.034(9) 0.089(14) 0.054(13) 0.008(9) 0.010(9) -0.003(10)
    C16 0.042(9) 0.056(11) 0.042(10) 0.022(7) 0.007(8) 0.016(7)
    C21 0.042(9) 0.039(8) 0.045(10) 0.005(7) 0.016(8) -0.004(7)
    C22 0.059(11) 0.043(9) 0.050(12) 0.009(8) 0.019(10) -0.003(8)
    C23 0.044(10) 0.051(10) 0.037(11) 0.011(8) 0.008(9) -0.004(8)
    C24 0.067(13) 0.046(10) 0.058(13) 0.007(8) 0.032(11) 0.003(8)
    C25 0.069(13) 0.045(9) 0.048(12) 0.015(9) 0.016(10) 0.000(8)
    C26 0.047(9) 0.050(11) 0.053(11) 0.017(7) 0.019(9) -0.003(7)
    C27 0.069(13) 0.037(9) 0.090(16) 0.000(8) 0.041(12) -0.007(9)
    C28 0.12(2) 0.047(12) 0.10(2) -0.032(13) 0.048(18) -0.025(12)
    C29 0.083(16) 0.097(16) 0.13(2) -0.009(13) 0.072(16) -0.025(15)
    C30 0.107(17) 0.066(12) 0.107(19) -0.016(12) 0.074(16) -0.002(12)
    C31 0.038(10) 0.047(10) 0.103(19) 0.005(8) 0.031(12) -0.003(11)
    C32 0.045(11) 0.088(15) 0.090(19) 0.012(11) 0.025(12) 0.027(14)
    C33 0.072(17) 0.14(3) 0.10(2) 0.001(17) 0.020(16) -0.04(2)
    C34 0.082(17) 0.08(2) 0.19(4) -0.007(16) 0.06(2) -0.05(2)
    C35 0.073(17) 0.073(14) 0.15(3) -0.012(13) 0.07(2) -0.002(19)
    C36 0.079(16) 0.066(15) 0.13(2) -0.004(11) 0.066(17) -0.011(14)
    C37 0.045(12) 0.101(16) 0.11(2) -0.004(11) 0.035(13) -0.033(14)
    C41 0.044(9) 0.048(9) 0.041(11) 0.006(8) 0.012(9) -0.010(8)
    C42 0.058(12) 0.066(12) 0.054(13) 0.014(9) 0.011(10) -0.006(10)
    C43 0.065(11) 0.102(15) 0.071(13) 0.006(18) 0.022(10) -0.010(18)
    C44 0.047(11) 0.13(2) 0.076(17) 0.011(12) 0.006(12) -0.030(14)
    C45 0.088(17) 0.108(19) 0.10(2) -0.014(15) 0.063(16) -0.025(16)
    C46 0.093(16) 0.064(12) 0.065(15) -0.012(12) 0.030(13) -0.011(10)
    C47 0.058(11) 0.063(11) 0.054(13) 0.015(9) 0.014(10) -0.019(9)
    C61 0.082(16) 0.048(11) 0.048(13) -0.019(11) 0.030(12) -0.009(9)
    C62 0.102(17) 0.052(11) 0.091(17) 0.013(11) 0.059(14) -0.007(11)
    C63 0.096(18) 0.14(3) 0.065(17) 0.039(18) 0.034(15) -0.004(16)
    C64 0.19(4) 0.053(15) 0.09(2) 0.04(2) 0.06(3) 0.000(14)
    C65 0.16(3) 0.068(17) 0.10(2) -0.019(19) 0.04(2) -0.010(15)
    C66 0.094(16) 0.062(14) 0.069(16) -0.012(12) 0.022(14) -0.002(11)
    N2 0.047(8) 0.041(8) 0.062(11) -0.002(6) 0.024(9) -0.014(7)
    N11 0.062(9) 0.033(7) 0.057(10) 0.016(6) 0.031(8) 0.011(6)
    O3 0.052(7) 0.061(7) 0.076(9) 0.002(6) 0.035(7) -0.009(6)
    O4 0.059(8) 0.060(7) 0.052(8) 0.020(6) 0.026(7) -0.012(6)
    O5 0.049(7) 0.039(6) 0.061(8) -0.001(5) 0.026(6) -0.006(5)
    O6 0.084(10) 0.055(8) 0.055(9) -0.006(7) 0.033(8) -0.009(7)
    C67 0.070(11) 0.051(14) 0.069(13) -0.011(9) 0.027(10) -0.002(9)
    F1 0.068(9) 0.179(17) 0.23(2) 0.026(10) 0.014(12) 0.032(16)
    F2 0.181(16) 0.072(8) 0.148(15) 0.011(9) 0.062(13) 0.037(9)
    F3 0.24(2) 0.117(12) 0.158(16) -0.002(13) 0.138(17) -0.031(11)
    F4 0.084(10) 0.084(10) 0.27(2) -0.024(8) 0.014(13) 0.042(13)
    F5 0.110(10) 0.068(8) 0.159(14) 0.009(7) 0.066(11) 0.025(8)
    F6 0.33(3) 0.100(11) 0.106(14) 0.075(14) 0.084(17) 0.006(10)
    Cl1 0.091(4) 0.053(3) 0.050(3) 0.005(2) 0.030(3) 0.007(2)
    Ru1 0.0455(6) 0.0367(6) 0.0427(7) 0.0095(8) 0.0157(5) 0.0000(8)
    P1 0.071(4) 0.051(3) 0.080(4) 0.006(3) 0.017(3) 0.002(3)

_geom_special_details                   
;

All esds (except the esd in the dihedral angle between two l.s. planes)
are estimated using the full covariance matrix.  The cell esds are taken
into account individually in the estimation of esds in distances, angles
and torsion angles; correlations between esds in cell parameters are only
used when they are defined by crystal symmetry.  An approximate (isotropic)
treatment of cell esds is used for estimating esds involving l.s. planes.
;

loop_
    _geom_bond_atom_site_label_1
    _geom_bond_atom_site_label_2
    _geom_bond_site_symmetry_2
    _geom_bond_distance
    _geom_bond_publ_flag
    C1 O5 . 1.428(16) ?
    C1 C12 . 1.516(19) ?
    C1 C2 . 1.536(19) ?
    C1 H1A . 0.980000 ?
    C3 O3 . 1.431(18) ?
    C3 C4 . 1.52(2) ?
    C3 C2 . 1.527(19) ?
    C3 H3 . 0.980000 ?
    C4 O4 . 1.438(19) ?
    C4 C5 . 1.53(2) ?
    C4 H4 . 0.980000 ?
    C5 O5 . 1.455(18) ?
    C5 C6 . 1.50(2) ?
    C5 H5 . 0.980000 ?
    C6 O6 . 1.38(2) ?
    C6 H6A . 0.970000 ?
    C6 H6B . 0.970000 ?
    C2 N2 . 1.48(2) ?
    C2 H2 . 0.980000 ?
    C12 N11 . 1.353(19) ?
    C12 C13 . 1.36(2) ?
    C13 C14 . 1.38(2) ?
    C13 H13A . 0.930000 ?
    C14 C15 . 1.38(2) ?
    C14 H14A . 0.930000 ?
    C15 C16 . 1.35(2) ?
    C15 H15A . 0.930000 ?
    C16 N11 . 1.359(18) ?
    C16 H16A . 0.930000 ?
    C21 C22 . 1.38(2) ?
    C21 C26 . 1.40(2) ?
    C21 C27 . 1.53(2) ?
    C21 Ru1 . 2.184(15) ?
    C22 C23 . 1.40(2) ?
    C22 Ru1 . 2.184(15) ?
    C22 H22 . 0.980000 ?
    C23 C24 . 1.43(2) ?
    C23 Ru1 . 2.177(17) ?
    C23 H23 . 0.980000 ?
    C24 C25 . 1.38(2) ?
    C24 C30 . 1.49(2) ?
    C24 Ru1 . 2.207(18) ?
    C25 C26 . 1.43(2) ?
    C25 Ru1 . 2.164(18) ?
    C25 H25 . 0.980000 ?
    C26 Ru1 . 2.166(17) ?
    C26 H26 . 0.980000 ?
    C27 C28 . 1.49(3) ?
    C27 C29 . 1.51(2) ?
    C27 H27 . 0.980000 ?
    C28 H28A . 0.960000 ?
    C28 H28B . 0.960000 ?
    C28 H28C . 0.960000 ?
    C29 H29A . 0.960000 ?
    C29 H29B . 0.960000 ?
    C29 H29C . 0.960000 ?
    C30 H30A . 0.960000 ?
    C30 H30B . 0.960000 ?
    C30 H30C . 0.960000 ?
    C31 C32 . 1.33(3) ?
    C31 C36 . 1.38(3) ?
    C31 C37 . 1.50(3) ?
    C32 C33 . 1.43(3) ?
    C32 H32 . 0.930000 ?
    C33 C34 . 1.34(4) ?
    C33 H33 . 0.930000 ?
    C34 C35 . 1.38(4) ?
    C34 H34 . 0.930000 ?
    C35 C36 . 1.41(3) ?
    C35 H35 . 0.930000 ?
    C36 H36 . 0.930000 ?
    C37 O3 . 1.44(2) ?
    C37 H37A . 0.970000 ?
    C37 H37B . 0.970000 ?
    C41 C42 . 1.34(2) ?
    C41 C46 . 1.40(2) ?
    C41 C47 . 1.51(2) ?
    C42 C43 . 1.36(3) ?
    C42 H42 . 0.930000 ?
    C43 C44 . 1.37(3) ?
    C43 H43 . 0.930000 ?
    C44 C45 . 1.40(3) ?
    C44 H44 . 0.930000 ?
    C45 C46 . 1.41(3) ?
    C45 H45 . 0.930000 ?
    C46 H46 . 0.930000 ?
    C47 O4 . 1.41(2) ?
    C47 H47A . 0.970000 ?
    C47 H47B . 0.970000 ?
    C61 C62 . 1.38(3) ?
    C61 C66 . 1.39(3) ?
    C61 C67 . 1.49(3) ?
    C62 C63 . 1.38(3) ?
    C62 H62 . 0.930000 ?
    C63 C64 . 1.40(4) ?
    C63 H63 . 0.930000 ?
    C64 C65 . 1.35(4) ?
    C64 H64 . 0.930000 ?
    C65 C66 . 1.36(3) ?
    C65 H65 . 0.930000 ?
    C66 H66 . 0.930000 ?
    N2 Ru1 . 2.153(13) ?
    N2 H2A . 0.87(3) ?
    N2 H2B . 0.87(3) ?
    N11 Ru1 . 2.091(14) ?
    O6 C67 . 1.43(2) ?
    C67 H67A . 0.970000 ?
    C67 H67B . 0.970000 ?
    F1 P1 . 1.505(16) ?
    F2 P1 . 1.569(14) ?
    F3 P1 . 1.551(15) ?
    F4 P1 . 1.573(16) ?
    F5 P1 . 1.599(13) ?
    F6 P1 . 1.533(16) ?
    Cl1 Ru1 . 2.374(5) ?

loop_
    _geom_angle_atom_site_label_1
    _geom_angle_atom_site_label_2
    _geom_angle_atom_site_label_3
    _geom_angle_site_symmetry_1
    _geom_angle_site_symmetry_3
    _geom_angle
    _geom_angle_publ_flag
    O5 C1 C12 . . 104.9(12) ?
    O5 C1 C2 . . 112.1(11) ?
    C12 C1 C2 . . 110.3(12) ?
    O5 C1 H1A . . 109.800000 ?
    C12 C1 H1A . . 109.800000 ?
    C2 C1 H1A . . 109.800000 ?
    O3 C3 C4 . . 111.7(14) ?
    O3 C3 C2 . . 105.7(12) ?
    C4 C3 C2 . . 109.8(13) ?
    O3 C3 H3 . . 109.900000 ?
    C4 C3 H3 . . 109.900000 ?
    C2 C3 H3 . . 109.900000 ?
    O4 C4 C3 . . 108.7(14) ?
    O4 C4 C5 . . 109.1(14) ?
    C3 C4 C5 . . 107.2(14) ?
    O4 C4 H4 . . 110.600000 ?
    C3 C4 H4 . . 110.600000 ?
    C5 C4 H4 . . 110.600000 ?
    O5 C5 C6 . . 107.2(14) ?
    O5 C5 C4 . . 105.1(13) ?
    C6 C5 C4 . . 115.1(14) ?
    O5 C5 H5 . . 109.800000 ?
    C6 C5 H5 . . 109.800000 ?
    C4 C5 H5 . . 109.800000 ?
    O6 C6 C5 . . 111.6(14) ?
    O6 C6 H6A . . 109.300000 ?
    C5 C6 H6A . . 109.300000 ?
    O6 C6 H6B . . 109.300000 ?
    C5 C6 H6B . . 109.300000 ?
    H6A C6 H6B . . 108.000000 ?
    N2 C2 C3 . . 108.6(13) ?
    N2 C2 C1 . . 108.4(12) ?
    C3 C2 C1 . . 114.4(12) ?
    N2 C2 H2 . . 108.400000 ?
    C3 C2 H2 . . 108.400000 ?
    C1 C2 H2 . . 108.400000 ?
    N11 C12 C13 . . 122.5(15) ?
    N11 C12 C1 . . 115.8(14) ?
    C13 C12 C1 . . 121.5(14) ?
    C12 C13 C14 . . 121.3(18) ?
    C12 C13 H13A . . 119.300000 ?
    C14 C13 H13A . . 119.300000 ?
    C13 C14 C15 . . 116.9(18) ?
    C13 C14 H14A . . 121.600000 ?
    C15 C14 H14A . . 121.600000 ?
    C16 C15 C14 . . 119.1(17) ?
    C16 C15 H15A . . 120.500000 ?
    C14 C15 H15A . . 120.500000 ?
    C15 C16 N11 . . 125.1(16) ?
    C15 C16 H16A . . 117.500000 ?
    N11 C16 H16A . . 117.500000 ?
    C22 C21 C26 . . 118.1(15) ?
    C22 C21 C27 . . 120.1(14) ?
    C26 C21 C27 . . 121.8(15) ?
    C22 C21 Ru1 . . 71.6(9) ?
    C26 C21 Ru1 . . 70.5(9) ?
    C27 C21 Ru1 . . 131.4(12) ?
    C21 C22 C23 . . 121.9(15) ?
    C21 C22 Ru1 . . 71.6(9) ?
    C23 C22 Ru1 . . 71.0(9) ?
    C21 C22 H22 . . 118.200000 ?
    C23 C22 H22 . . 118.200000 ?
    Ru1 C22 H22 . . 118.200000 ?
    C22 C23 C24 . . 120.3(15) ?
    C22 C23 Ru1 . . 71.5(9) ?
    C24 C23 Ru1 . . 72.0(10) ?
    C22 C23 H23 . . 119.400000 ?
    C24 C23 H23 . . 119.400000 ?
    Ru1 C23 H23 . . 119.400000 ?
    C25 C24 C23 . . 118.0(16) ?
    C25 C24 C30 . . 121.3(16) ?
    C23 C24 C30 . . 120.6(17) ?
    C25 C24 Ru1 . . 69.9(10) ?
    C23 C24 Ru1 . . 69.8(11) ?
    C30 C24 Ru1 . . 128.1(14) ?
    C24 C25 C26 . . 120.7(15) ?
    C24 C25 Ru1 . . 73.3(11) ?
    C26 C25 Ru1 . . 70.8(10) ?
    C24 C25 H25 . . 119.200000 ?
    C26 C25 H25 . . 119.200000 ?
    Ru1 C25 H25 . . 119.200000 ?
    C21 C26 C25 . . 120.9(15) ?
    C21 C26 Ru1 . . 71.9(9) ?
    C25 C26 Ru1 . . 70.6(10) ?
    C21 C26 H26 . . 118.900000 ?
    C25 C26 H26 . . 118.900000 ?
    Ru1 C26 H26 . . 118.900000 ?
    C28 C27 C29 . . 113.1(19) ?
    C28 C27 C21 . . 108.2(16) ?
    C29 C27 C21 . . 113.7(14) ?
    C28 C27 H27 . . 107.200000 ?
    C29 C27 H27 . . 107.200000 ?
    C21 C27 H27 . . 107.200000 ?
    C27 C28 H28A . . 109.500000 ?
    C27 C28 H28B . . 109.500000 ?
    H28A C28 H28B . . 109.500000 ?
    C27 C28 H28C . . 109.500000 ?
    H28A C28 H28C . . 109.500000 ?
    H28B C28 H28C . . 109.500000 ?
    C27 C29 H29A . . 109.500000 ?
    C27 C29 H29B . . 109.500000 ?
    H29A C29 H29B . . 109.500000 ?
    C27 C29 H29C . . 109.500000 ?
    H29A C29 H29C . . 109.500000 ?
    H29B C29 H29C . . 109.500000 ?
    C24 C30 H30A . . 109.500000 ?
    C24 C30 H30B . . 109.500000 ?
    H30A C30 H30B . . 109.500000 ?
    C24 C30 H30C . . 109.500000 ?
    H30A C30 H30C . . 109.500000 ?
    H30B C30 H30C . . 109.500000 ?
    C32 C31 C36 . . 122.(2) ?
    C32 C31 C37 . . 121.(2) ?
    C36 C31 C37 . . 117.(2) ?
    C31 C32 C33 . . 121.(2) ?
    C31 C32 H32 . . 119.600000 ?
    C33 C32 H32 . . 119.600000 ?
    C34 C33 C32 . . 118.(3) ?
    C34 C33 H33 . . 121.200000 ?
    C32 C33 H33 . . 121.200000 ?
    C33 C34 C35 . . 122.(3) ?
    C33 C34 H34 . . 118.900000 ?
    C35 C34 H34 . . 118.900000 ?
    C34 C35 C36 . . 120.(2) ?
    C34 C35 H35 . . 120.200000 ?
    C36 C35 H35 . . 120.200000 ?
    C31 C36 C35 . . 118.(2) ?
    C31 C36 H36 . . 121.200000 ?
    C35 C36 H36 . . 121.200000 ?
    O3 C37 C31 . . 113.8(15) ?
    O3 C37 H37A . . 108.800000 ?
    C31 C37 H37A . . 108.800000 ?
    O3 C37 H37B . . 108.800000 ?
    C31 C37 H37B . . 108.800000 ?
    H37A C37 H37B . . 107.700000 ?
    C42 C41 C46 . . 119.1(17) ?
    C42 C41 C47 . . 120.5(17) ?
    C46 C41 C47 . . 120.4(17) ?
    C41 C42 C43 . . 123.(2) ?
    C41 C42 H42 . . 118.400000 ?
    C43 C42 H42 . . 118.400000 ?
    C42 C43 C44 . . 119.(3) ?
    C42 C43 H43 . . 120.400000 ?
    C44 C43 H43 . . 120.400000 ?
    C43 C44 C45 . . 121.(2) ?
    C43 C44 H44 . . 119.600000 ?
    C45 C44 H44 . . 119.600000 ?
    C44 C45 C46 . . 118.(2) ?
    C44 C45 H45 . . 120.900000 ?
    C46 C45 H45 . . 120.900000 ?
    C41 C46 C45 . . 119.(2) ?
    C41 C46 H46 . . 120.300000 ?
    C45 C46 H46 . . 120.300000 ?
    O4 C47 C41 . . 108.8(14) ?
    O4 C47 H47A . . 109.900000 ?
    C41 C47 H47A . . 109.900000 ?
    O4 C47 H47B . . 109.900000 ?
    C41 C47 H47B . . 109.900000 ?
    H47A C47 H47B . . 108.300000 ?
    C62 C61 C66 . . 118.(2) ?
    C62 C61 C67 . . 122.3(18) ?
    C66 C61 C67 . . 119.2(19) ?
    C61 C62 C63 . . 121.(2) ?
    C61 C62 H62 . . 119.400000 ?
    C63 C62 H62 . . 119.400000 ?
    C62 C63 C64 . . 118.(2) ?
    C62 C63 H63 . . 120.800000 ?
    C64 C63 H63 . . 120.800000 ?
    C65 C64 C63 . . 120.(3) ?
    C65 C64 H64 . . 120.000000 ?
    C63 C64 H64 . . 120.000000 ?
    C64 C65 C66 . . 121.(3) ?
    C64 C65 H65 . . 119.300000 ?
    C66 C65 H65 . . 119.300000 ?
    C65 C66 C61 . . 120.(2) ?
    C65 C66 H66 . . 119.800000 ?
    C61 C66 H66 . . 119.800000 ?
    C2 N2 Ru1 . . 120.2(10) ?
    C2 N2 H2A . . 102.(10) ?
    Ru1 N2 H2A . . 100.(10) ?
    C2 N2 H2B . . 114.(10) ?
    Ru1 N2 H2B . . 82.(10) ?
    H2A N2 H2B . . 137.(10) ?
    C12 N11 C16 . . 115.1(14) ?
    C12 N11 Ru1 . . 126.6(11) ?
    C16 N11 Ru1 . . 118.2(10) ?
    C3 O3 C37 . . 113.5(15) ?
    C47 O4 C4 . . 111.6(14) ?
    C1 O5 C5 . . 114.5(11) ?
    C6 O6 C67 . . 113.9(14) ?
    O6 C67 C61 . . 115.2(15) ?
    O6 C67 H67A . . 108.500000 ?
    C61 C67 H67A . . 108.500000 ?
    O6 C67 H67B . . 108.500000 ?
    C61 C67 H67B . . 108.500000 ?
    H67A C67 H67B . . 107.500000 ?
    N11 Ru1 N2 . . 87.3(5) ?
    N11 Ru1 C25 . . 115.6(6) ?
    N2 Ru1 C25 . . 96.4(6) ?
    N11 Ru1 C26 . . 153.8(5) ?
    N2 Ru1 C26 . . 91.8(6) ?
    C25 Ru1 C26 . . 38.5(6) ?
    N11 Ru1 C23 . . 93.7(6) ?
    N2 Ru1 C23 . . 162.6(6) ?
    C25 Ru1 C23 . . 67.5(6) ?
    C26 Ru1 C23 . . 79.7(6) ?
    N11 Ru1 C22 . . 121.4(6) ?
    N2 Ru1 C22 . . 149.9(6) ?
    C25 Ru1 C22 . . 79.8(6) ?
    C26 Ru1 C22 . . 66.6(6) ?
    C23 Ru1 C22 . . 37.5(6) ?
    N11 Ru1 C21 . . 158.2(5) ?
    N2 Ru1 C21 . . 113.8(5) ?
    C25 Ru1 C21 . . 69.0(6) ?
    C26 Ru1 C21 . . 37.6(5) ?
    C23 Ru1 C21 . . 67.8(6) ?
    C22 Ru1 C21 . . 36.9(6) ?
    N11 Ru1 C24 . . 91.2(6) ?
    N2 Ru1 C24 . . 124.5(6) ?
    C25 Ru1 C24 . . 36.8(7) ?
    C26 Ru1 C24 . . 67.9(7) ?
    C23 Ru1 C24 . . 38.2(5) ?
    C22 Ru1 C24 . . 68.1(6) ?
    C21 Ru1 C24 . . 81.1(6) ?
    N11 Ru1 Cl1 . . 85.0(4) ?
    N2 Ru1 Cl1 . . 82.4(4) ?
    C25 Ru1 Cl1 . . 159.3(5) ?
    C26 Ru1 Cl1 . . 120.8(5) ?
    C23 Ru1 Cl1 . . 115.0(5) ?
    C22 Ru1 Cl1 . . 90.9(5) ?
    C21 Ru1 Cl1 . . 92.4(4) ?
    C24 Ru1 Cl1 . . 152.7(5) ?
    F1 P1 F6 . . 91.4(13) ?
    F1 P1 F3 . . 91.8(12) ?
    F6 P1 F3 . . 176.3(12) ?
    F1 P1 F2 . . 90.4(10) ?
    F6 P1 F2 . . 88.9(9) ?
    F3 P1 F2 . . 93.0(10) ?
    F1 P1 F4 . . 179.1(13) ?
    F6 P1 F4 . . 89.5(12) ?
    F3 P1 F4 . . 87.3(12) ?
    F2 P1 F4 . . 89.9(9) ?
    F1 P1 F5 . . 92.7(10) ?
    F6 P1 F5 . . 89.0(9) ?
    F3 P1 F5 . . 88.9(9) ?
    F2 P1 F5 . . 176.3(10) ?
    F4 P1 F5 . . 87.0(8) ?

loop_
    _geom_torsion_atom_site_label_1
    _geom_torsion_atom_site_label_2
    _geom_torsion_atom_site_label_3
    _geom_torsion_atom_site_label_4
    _geom_torsion_site_symmetry_1
    _geom_torsion_site_symmetry_2
    _geom_torsion_site_symmetry_3
    _geom_torsion_site_symmetry_4
    _geom_torsion
    _geom_torsion_publ_flag
    O3 C3 C4 O4 . . . . -65.5(19) ?
    C2 C3 C4 O4 . . . . 177.6(14) ?
    O3 C3 C4 C5 . . . . 176.6(13) ?
    C2 C3 C4 C5 . . . . 59.7(19) ?
    O4 C4 C5 O5 . . . . 173.5(13) ?
    C3 C4 C5 O5 . . . . -68.9(17) ?
    O4 C4 C5 C6 . . . . 56.(2) ?
    C3 C4 C5 C6 . . . . 173.5(15) ?
    O5 C5 C6 O6 . . . . -71.3(17) ?
    C4 C5 C6 O6 . . . . 45.(2) ?
    O3 C3 C2 N2 . . . . 72.6(16) ?
    C4 C3 C2 N2 . . . . -166.8(14) ?
    O3 C3 C2 C1 . . . . -166.1(13) ?
    C4 C3 C2 C1 . . . . -46.(2) ?
    O5 C1 C2 N2 . . . . 161.6(13) ?
    C12 C1 C2 N2 . . . . -81.9(16) ?
    O5 C1 C2 C3 . . . . 40.2(18) ?
    C12 C1 C2 C3 . . . . 156.7(14) ?
    O5 C1 C12 N11 . . . . 176.6(13) ?
    C2 C1 C12 N11 . . . . 55.8(17) ?
    O5 C1 C12 C13 . . . . 2.9(19) ?
    C2 C1 C12 C13 . . . . -118.0(16) ?
    N11 C12 C13 C14 . . . . 3.(3) ?
    C1 C12 C13 C14 . . . . 175.9(15) ?
    C12 C13 C14 C15 . . . . -2.(3) ?
    C13 C14 C15 C16 . . . . 0.(3) ?
    C14 C15 C16 N11 . . . . 1.(3) ?
    C26 C21 C22 C23 . . . . 2.(2) ?
    C27 C21 C22 C23 . . . . 179.9(16) ?
    Ru1 C21 C22 C23 . . . . -52.3(15) ?
    C26 C21 C22 Ru1 . . . . 54.8(14) ?
    C27 C21 C22 Ru1 . . . . -127.8(15) ?
    C21 C22 C23 C24 . . . . -3.(3) ?
    Ru1 C22 C23 C24 . . . . -55.1(15) ?
    C21 C22 C23 Ru1 . . . . 52.5(15) ?
    C22 C23 C24 C25 . . . . 2.(3) ?
    Ru1 C23 C24 C25 . . . . -52.4(15) ?
    C22 C23 C24 C30 . . . . 178.0(17) ?
    Ru1 C23 C24 C30 . . . . 123.2(18) ?
    C22 C23 C24 Ru1 . . . . 54.9(15) ?
    C23 C24 C25 C26 . . . . -2.(3) ?
    C30 C24 C25 C26 . . . . -177.9(17) ?
    Ru1 C24 C25 C26 . . . . -54.7(15) ?
    C23 C24 C25 Ru1 . . . . 52.4(15) ?
    C30 C24 C25 Ru1 . . . . -123.2(18) ?
    C22 C21 C26 C25 . . . . -2.(2) ?
    C27 C21 C26 C25 . . . . -179.8(15) ?
    Ru1 C21 C26 C25 . . . . 52.9(15) ?
    C22 C21 C26 Ru1 . . . . -55.3(14) ?
    C27 C21 C26 Ru1 . . . . 127.3(16) ?
    C24 C25 C26 C21 . . . . 2.(3) ?
    Ru1 C25 C26 C21 . . . . -53.5(14) ?
    C24 C25 C26 Ru1 . . . . 55.9(16) ?
    C22 C21 C27 C28 . . . . -90.(2) ?
    C26 C21 C27 C28 . . . . 87.(2) ?
    Ru1 C21 C27 C28 . . . . 178.6(14) ?
    C22 C21 C27 C29 . . . . 143.4(19) ?
    C26 C21 C27 C29 . . . . -39.(3) ?
    Ru1 C21 C27 C29 . . . . 52.(2) ?
    C36 C31 C32 C33 . . . . 3.(3) ?
    C37 C31 C32 C33 . . . . -179.7(18) ?
    C31 C32 C33 C34 . . . . -3.(3) ?
    C32 C33 C34 C35 . . . . 3.(4) ?
    C33 C34 C35 C36 . . . . -3.(4) ?
    C32 C31 C36 C35 . . . . -3.(3) ?
    C37 C31 C36 C35 . . . . 179.6(18) ?
    C34 C35 C36 C31 . . . . 3.(3) ?
    C32 C31 C37 O3 . . . . -106.(2) ?
    C36 C31 C37 O3 . . . . 71.(2) ?
    C46 C41 C42 C43 . . . . 1.(3) ?
    C47 C41 C42 C43 . . . . -178.1(18) ?
    C41 C42 C43 C44 . . . . -1.(3) ?
    C42 C43 C44 C45 . . . . 2.(3) ?
    C43 C44 C45 C46 . . . . -3.(3) ?
    C42 C41 C46 C45 . . . . -1.(3) ?
    C47 C41 C46 C45 . . . . 177.5(18) ?
    C44 C45 C46 C41 . . . . 2.(3) ?
    C42 C41 C47 O4 . . . . -46.(2) ?
    C46 C41 C47 O4 . . . . 134.7(17) ?
    C66 C61 C62 C63 . . . . 3.(3) ?
    C67 C61 C62 C63 . . . . 180.(2) ?
    C61 C62 C63 C64 . . . . -3.(4) ?
    C62 C63 C64 C65 . . . . 2.(4) ?
    C63 C64 C65 C66 . . . . 0.(5) ?
    C64 C65 C66 C61 . . . . -1.(4) ?
    C62 C61 C66 C65 . . . . -1.(3) ?
    C67 C61 C66 C65 . . . . -177.(2) ?
    C3 C2 N2 Ru1 . . . . 165.5(10) ?
    C1 C2 N2 Ru1 . . . . 40.7(16) ?
    C13 C12 N11 C16 . . . . -1.(2) ?
    C1 C12 N11 C16 . . . . -174.7(12) ?
    C13 C12 N11 Ru1 . . . . -177.2(12) ?
    C1 C12 N11 Ru1 . . . . 9.1(19) ?
    C15 C16 N11 C12 . . . . -1.(2) ?
    C15 C16 N11 Ru1 . . . . 175.7(14) ?
    C4 C3 O3 C37 . . . . 98.5(17) ?
    C2 C3 O3 C37 . . . . -142.2(14) ?
    C31 C37 O3 C3 . . . . 89.(2) ?
    C41 C47 O4 C4 . . . . -172.2(14) ?
    C3 C4 O4 C47 . . . . 107.2(17) ?
    C5 C4 O4 C47 . . . . -136.2(16) ?
    C12 C1 O5 C5 . . . . -171.9(12) ?
    C2 C1 O5 C5 . . . . -52.2(17) ?
    C6 C5 O5 C1 . . . . -170.4(12) ?
    C4 C5 O5 C1 . . . . 66.7(17) ?
    C5 C6 O6 C67 . . . . 165.4(14) ?
    C6 O6 C67 C61 . . . . 63.(2) ?
    C62 C61 C67 O6 . . . . 40.(3) ?
    C66 C61 C67 O6 . . . . -143.6(19) ?

loop_
    _geom_hbond_atom_site_label_D
    _geom_hbond_atom_site_label_H
    _geom_hbond_atom_site_label_A
    _geom_hbond_site_symmetry_A
    _geom_hbond_distance_DH
    _geom_hbond_distance_HA
    _geom_hbond_distance_DA
    _geom_hbond_angle_DHA
    _geom_hbond_publ_flag
    C37 H37A O4 . 0.970000 2.560000 3.15(2) 119.000000 ?
    C47 H47A Cl1 2_657 0.970000 2.930000 3.868(19) 161.900000 ?
    C67 H67B Cl1 2_657 0.970000 2.920000 3.56(2) 124.200000 ?
    N2 H2A Cl1 . 0.87(3) 2.53(17) 2.987(15) 114.(14) ?
    N2 H2B F5 . 0.87(3) 2.56(9) 3.37(2) 155.(17) ?

_shelx_res_file                         
;

TITL mo_23006B_0m_a.res in P2(1)
    mo_23006B_0m_a.res
    created by SHELXL-2019/1 at 09:44:54 on 12-Jan-2023
CELL 0.71073 11.6071 16.6555 11.7541 90.000 113.396 90.000
ZERR 2.00 0.0016 0.0024 0.0019 0.000 0.003 0.000
LATT -1
SYMM -x, y+1/2, -z
SFAC C H N O F CL RU P
UNIT 84 96 4 8 12 2 2 2
LIST 4 ! automatically inserted. Change 6 to 4 for CHECKCIF!!
TEMP 21.000
ACTA
L.S. 14
FMAP 2
PLAN 20
HTAB
BOND $H
CONF
ACTA
DFIX 0.87 N2 H2A N2 H2B
HTAB C37 O4
EQIV $1 -x+1, y+1/2, -z+2
HTAB C47 Cl1_$1
HTAB C67 Cl1_$1
HTAB N2 Cl1
HTAB N2 F5
SIZE 0.052 0.236 0.259
WGHT    0.027000    9.494694
EXTI    0.002193
FVAR       0.49501
C1    1    0.501873    0.440802    0.723237    11.00000    0.04465    0.03261 =
         0.04774    0.00060    0.02796    0.00245
AFIX  13
H1A   2    0.472081    0.440989    0.632673    11.00000   -1.20000
AFIX   0
C3    1    0.296275    0.453509    0.756336    11.00000    0.03858    0.03813 =
         0.05611   -0.00478    0.02516    0.00408
AFIX  13
H3    2    0.237773    0.461036    0.669942    11.00000   -1.20000
AFIX   0
C4    1    0.346797    0.534094    0.814651    11.00000    0.05974    0.03520 =
         0.06643   -0.01017    0.02727    0.01213
AFIX  13
H4    2    0.403383    0.527434    0.901895    11.00000   -1.20000
AFIX   0
C5    1    0.416985    0.570996    0.740828    11.00000    0.05642    0.03858 =
         0.04318    0.00069    0.02425    0.00387
AFIX  13
H5    2    0.364354    0.568286    0.651916    11.00000   -1.20000
AFIX   0
C6    1    0.461872    0.655512    0.776042    11.00000    0.08378    0.04059 =
         0.05023    0.00288    0.03395    0.00578
AFIX  23
H6A   2    0.521725    0.669170    0.740407    11.00000   -1.20000
H6B   2    0.391274    0.692028    0.742104    11.00000   -1.20000
AFIX   0
C2    1    0.404671    0.399477    0.761904    11.00000    0.05284    0.03663 =
         0.04838   -0.00499    0.02920    0.00095
AFIX  13
H2    2    0.447591    0.379882    0.847052    11.00000   -1.20000
AFIX   0
C12   1    0.627000    0.397699    0.779494    11.00000    0.04464    0.05693 =
         0.02007    0.00528    0.01106    0.00764
C13   1    0.731772    0.435276    0.860363    11.00000    0.04960    0.06904 =
         0.02634   -0.00148   -0.00418   -0.00698
AFIX  43
H13A  2    0.727827    0.489481    0.877467    11.00000   -1.20000
AFIX   0
C14   1    0.843424    0.394613    0.917305    11.00000    0.05344    0.08774 =
         0.05858    0.00961    0.01484   -0.01628
AFIX  43
H14A  2    0.915835    0.420472    0.970410    11.00000   -1.20000
AFIX   0
C15   1    0.842764    0.313438    0.891754    11.00000    0.03362    0.08914 =
         0.05362   -0.00264    0.01044    0.00766
AFIX  43
H15A  2    0.915433    0.282993    0.928093    11.00000   -1.20000
AFIX   0
C16   1    0.735182    0.279095    0.813368    11.00000    0.04168    0.05591 =
         0.04179    0.01613    0.00737    0.02160
AFIX  43
H16A  2    0.736742    0.224296    0.798861    11.00000   -1.20000
AFIX   0
C21   1    0.375445    0.157644    0.499203    11.00000    0.04207    0.03920 =
         0.04549   -0.00432    0.01572    0.00518
C22   1    0.503002    0.145041    0.538435    11.00000    0.05932    0.04349 =
         0.05019   -0.00309    0.01852    0.00900
AFIX  13
H22   2    0.539794    0.098232    0.590812    11.00000   -1.20000
AFIX   0
C23   1    0.584079    0.205074    0.530524    11.00000    0.04433    0.05063 =
         0.03703   -0.00399    0.00841    0.01147
AFIX  13
H23   2    0.674911    0.198440    0.575425    11.00000   -1.20000
AFIX   0
C24   1    0.535127    0.281325    0.476012    11.00000    0.06656    0.04557 =
         0.05792    0.00308    0.03241    0.00707
C25   1    0.407663    0.294172    0.436623    11.00000    0.06942    0.04511 =
         0.04817   -0.00016    0.01618    0.01541
AFIX  13
H25   2    0.374726    0.348835    0.415904    11.00000   -1.20000
AFIX   0
C26   1    0.326812    0.232106    0.445796    11.00000    0.04697    0.04981 =
         0.05347   -0.00269    0.01876    0.01727
AFIX  13
H26   2    0.240028    0.245637    0.431707    11.00000   -1.20000
AFIX   0
C27   1    0.290308    0.090055    0.509525    11.00000    0.06897    0.03716 =
         0.08986   -0.00688    0.04096   -0.00011
AFIX  13
H27   2    0.342591    0.054382    0.576405    11.00000   -1.20000
AFIX   0
C28   1    0.246368    0.042681    0.392661    11.00000    0.11837    0.04660 =
         0.10152   -0.02532    0.04833   -0.03175
AFIX 137
H28A  2    0.211934   -0.007400    0.404861    11.00000   -1.50000
H28B  2    0.315816    0.032480    0.369892    11.00000   -1.50000
H28C  2    0.183000    0.072394    0.327817    11.00000   -1.50000
AFIX   0
C29   1    0.183983    0.119126    0.542811    11.00000    0.08339    0.09658 =
         0.13004   -0.02533    0.07246   -0.00853
AFIX 137
H29A  2    0.140110    0.073777    0.556596    11.00000   -1.50000
H29B  2    0.127029    0.150990    0.476121    11.00000   -1.50000
H29C  2    0.217419    0.151036    0.616813    11.00000   -1.50000
AFIX   0
C30   1    0.621132    0.346494    0.470898    11.00000    0.10685    0.06551 =
         0.10654   -0.00180    0.07367   -0.01622
AFIX 137
H30A  2    0.635936    0.341105    0.396502    11.00000   -1.50000
H30B  2    0.699386    0.342562    0.541702    11.00000   -1.50000
H30C  2    0.583413    0.397746    0.471200    11.00000   -1.50000
AFIX   0
C31   1    0.035116    0.356781    0.673973    11.00000    0.03827    0.04726 =
         0.10332   -0.00330    0.03067    0.00510
C32   1   -0.014285    0.374254    0.553841    11.00000    0.04518    0.08762 =
         0.09041    0.02738    0.02486    0.01217
AFIX  43
H32   2   -0.007817    0.426231    0.528072    11.00000   -1.20000
AFIX   0
C33   1   -0.077442    0.314018    0.463398    11.00000    0.07231    0.13501 =
         0.10218   -0.04380    0.01981    0.00081
AFIX  43
H33   2   -0.115352    0.326473    0.379480    11.00000   -1.20000
AFIX   0
C34   1   -0.079921    0.239243    0.503987    11.00000    0.08229    0.08437 =
         0.19273   -0.04514    0.06406   -0.00678
AFIX  43
H34   2   -0.117497    0.198906    0.446434    11.00000   -1.20000
AFIX   0
C35   1   -0.028528    0.219962    0.628523    11.00000    0.07324    0.07263 =
         0.15382   -0.00168    0.06590   -0.01196
AFIX  43
H35   2   -0.034812    0.167910    0.654122    11.00000   -1.20000
AFIX   0
C36   1    0.033715    0.279897    0.716860    11.00000    0.07928    0.06604 =
         0.13150   -0.01087    0.06597   -0.00419
AFIX  43
H36   2    0.072323    0.267866    0.800885    11.00000   -1.20000
AFIX   0
C37   1    0.100814    0.419999    0.768969    11.00000    0.04510    0.10057 =
         0.11336   -0.03349    0.03550   -0.00431
AFIX  23
H37A  2    0.079603    0.472411    0.730236    11.00000   -1.20000
H37B  2    0.069900    0.417646    0.834398    11.00000   -1.20000
AFIX   0
C41   1    0.112649    0.639521    0.897608    11.00000    0.04392    0.04836 =
         0.04079   -0.00982    0.01176    0.00559
C42   1    0.080503    0.704822    0.825546    11.00000    0.05755    0.06587 =
         0.05403   -0.00581    0.01110    0.01350
AFIX  43
H42   2    0.132800    0.721238    0.787123    11.00000   -1.20000
AFIX   0
C43   1   -0.024880    0.748447    0.805622    11.00000    0.06544    0.10199 =
         0.07077   -0.00967    0.02189    0.00565
AFIX  43
H43   2   -0.042881    0.794018    0.755851    11.00000   -1.20000
AFIX   0
C44   1   -0.103890    0.724494    0.859610    11.00000    0.04682    0.12597 =
         0.07567   -0.03000    0.00620    0.01063
AFIX  43
H44   2   -0.177360    0.753104    0.844323    11.00000   -1.20000
AFIX   0
C45   1   -0.075702    0.657581    0.937464    11.00000    0.08756    0.10845 =
         0.10005   -0.02524    0.06295   -0.01417
AFIX  43
H45   2   -0.127749    0.642454    0.976853    11.00000   -1.20000
AFIX   0
C46   1    0.034061    0.613407    0.954864    11.00000    0.09293    0.06357 =
         0.06476   -0.01081    0.02973   -0.01206
AFIX  43
H46   2    0.053879    0.567460    1.003849    11.00000   -1.20000
AFIX   0
C47   1    0.233236    0.595368    0.918816    11.00000    0.05815    0.06277 =
         0.05440   -0.01933    0.01393    0.01538
AFIX  23
H47A  2    0.304433    0.625916    0.974535    11.00000   -1.20000
H47B  2    0.233205    0.543486    0.956296    11.00000   -1.20000
AFIX   0
C61   1    0.514976    0.812914    0.903438    11.00000    0.08249    0.04831 =
         0.04822   -0.00907    0.02954   -0.01900
C62   1    0.397334    0.821235    0.905007    11.00000    0.10213    0.05242 =
         0.09143   -0.00709    0.05943    0.01256
AFIX  43
H62   2    0.362077    0.778244    0.930275    11.00000   -1.20000
AFIX   0
C63   1    0.330920    0.892156    0.869789    11.00000    0.09629    0.13904 =
         0.06481   -0.00423    0.03356    0.03946
AFIX  43
H63   2    0.249879    0.896367    0.866821    11.00000   -1.20000
AFIX   0
C64   1    0.388279    0.957392    0.838740    11.00000    0.19322    0.05315 =
         0.09102    0.00037    0.05787    0.03786
AFIX  43
H64   2    0.346500    1.006298    0.817454    11.00000   -1.20000
AFIX   0
C65   1    0.504487    0.949455    0.839624    11.00000    0.15816    0.06797 =
         0.09879   -0.01011    0.03536   -0.01949
AFIX  43
H65   2    0.541801    0.993250    0.818681    11.00000   -1.20000
AFIX   0
C66   1    0.567974    0.878803    0.870482    11.00000    0.09363    0.06156 =
         0.06926   -0.00201    0.02195   -0.01153
AFIX  43
H66   2    0.647467    0.874629    0.869484    11.00000   -1.20000
AFIX   0
N2    3    0.352552    0.329567    0.679476    11.00000    0.04730    0.04082 =
         0.06154   -0.01398    0.02386   -0.00175
N11   3    0.624732    0.318355    0.753971    11.00000    0.06228    0.03252 =
         0.05740    0.01068    0.03073    0.01564
O3    4    0.235036    0.411775    0.823132    11.00000    0.05245    0.06105 =
         0.07612   -0.00903    0.03452    0.00184
O4    4    0.242824    0.585010    0.803557    11.00000    0.05934    0.05974 =
         0.05230   -0.01227    0.02583    0.01974
O5    4    0.527724    0.521018    0.769254    11.00000    0.04948    0.03924 =
         0.06071   -0.00593    0.02598   -0.00123
O6    4    0.517857    0.665008    0.903256    11.00000    0.08433    0.05501 =
         0.05460   -0.00934    0.03318   -0.00555
C67   1    0.589000    0.737216    0.941874    11.00000    0.06984    0.05082 =
         0.06887   -0.00200    0.02707   -0.01136
AFIX  23
H67A  2    0.653348    0.737506    0.908719    11.00000   -1.20000
H67B  2    0.631092    0.736748    1.031554    11.00000   -1.20000
AFIX   0
F1    5    0.032035    0.490843    0.264047    11.00000    0.06787    0.17867 =
         0.23433    0.03215    0.01403    0.02646
F2    5    0.182650    0.571311    0.270057    11.00000    0.18077    0.07236 =
         0.14756    0.03705    0.06185    0.01086
F3    5    0.187739    0.439219    0.227211    11.00000    0.24368    0.11719 =
         0.15801   -0.03100    0.13804   -0.00214
F4    5    0.319620    0.486939    0.400680    11.00000    0.08394    0.08447 =
         0.26871    0.04210    0.01411   -0.02398
F5    5    0.170141    0.407765    0.401956    11.00000    0.11030    0.06756 =
         0.15871    0.02480    0.06582    0.00859
F6    5    0.165183    0.536452    0.440629    11.00000    0.33398    0.10021 =
         0.10650    0.00611    0.08400    0.07499
CL1   6    0.483080    0.179126    0.802309    11.00000    0.09058    0.05268 =
         0.04968    0.00650    0.02981    0.00529
RU1   7    0.473763    0.253947    0.626997    11.00000    0.04549    0.03666 =
         0.04272    0.00003    0.01574    0.00949
P1    8    0.172593    0.489476    0.331552    11.00000    0.07134    0.05074 =
         0.07966    0.00179    0.01693    0.00618
H2A   2    0.334061    0.296587    0.727192    11.00000   -1.20000
H2B   2    0.322441    0.341128    0.600842    11.00000   -1.20000
HKLF 4 1 1 0 0 0 1 0 0 0 1


REM  mo_23006B_0m_a.res in P2(1)
REM wR2 = 0.1847, GooF = S = 1.065, Restrained GooF = 1.065 for all data
REM R1 = 0.0826 for 4883 Fo > 4sig(Fo) and 0.1504 for all 7605 data
REM 524 parameters refined using 3 restraints

END

WGHT      0.0200      9.8126

REM Instructions for potential hydrogen bonds
HTAB C37 O4
HTAB C47 Cl1_$1
HTAB C67 Cl1_$1
HTAB N2 Cl1
HTAB N2 F5

REM Highest difference peak  0.586,  deepest hole -0.781,  1-sigma level  0.100
Q1    1   0.4134  0.7542  0.8807  11.00000  0.05    0.59
Q2    1   0.4262  0.2593  0.5164  11.00000  0.05    0.57
Q3    1   0.5423  0.2001  0.7011  11.00000  0.05    0.56
Q4    1   0.4011  0.3155  0.5634  11.00000  0.05    0.52
Q5    1   0.5382  0.2975  0.7171  11.00000  0.05    0.50
Q6    1   0.5211  0.2484  0.7363  11.00000  0.05    0.46
Q7    1   0.3960  0.1851  0.5821  11.00000  0.05    0.44
Q8    1   0.0168  0.0677  0.2843  11.00000  0.05    0.39
Q9    1   0.1585  0.4913  0.1230  11.00000  0.05    0.38
Q10   1   0.4270  0.7485  0.9864  11.00000  0.05    0.38
Q11   1   0.6029  0.2484  0.9027  11.00000  0.05    0.38
Q12   1   0.2557  0.2559  0.3811  11.00000  0.05    0.38
Q13   1   0.4426  0.2814  0.7370  11.00000  0.05    0.38
Q14   1   0.6410  0.7006  0.8249  11.00000  0.05    0.37
Q15   1   0.0544  0.7523  0.9168  11.00000  0.05    0.37
Q16   1   0.3791  0.2519  0.6809  11.00000  0.05    0.36
Q17   1   0.5829  0.2579  0.5723  11.00000  0.05    0.36
Q18   1   0.3472  0.7545  0.7683  11.00000  0.05    0.35
Q19   1   0.0260  0.5097  0.3755  11.00000  0.05    0.35
Q20   1   0.2206  0.4982  0.4484  11.00000  0.05    0.34
;
_shelx_res_checksum                     68284

_shelx_hkl_file                         
;
  -2   0   0 4461.65  245.98
  -2   0   0 4428.36  245.58
   2   0   0 4404.56  246.28
   2   0   0 4375.66  245.78
   3   0   0 2185.78  131.69
   3   0   0 2175.28  131.09
  -3   0   0 2294.27  131.49
  -3   0   0 2281.27  130.89
  -4   0   0 1002.30   65.19
   4   0   0  939.21   66.09
  -4   0   0 1008.00   65.89
   4   0   0  936.11   65.49
   5   0   0  224.28   27.40
  -5   0   0  261.37   26.10
  -5   0   0  262.67   26.70
   5   0   0  223.88   26.90
  -6   0   0  633.04   50.79
  -6   0   0  630.34   49.99
   6   0   0  572.14   51.89
   6   0   0  570.54   51.09
   7   0   0  306.97   36.00
   7   0   0  307.77   35.40
  -7   0   0  326.67   34.30
  -7   0   0  325.57   33.60
   8   0   0   97.19   25.70
   8   0   0   97.59   25.20
  -8   0   0  137.89   25.30
   8   0   0   59.89   25.60
  -8   0   0  137.49   24.70
   9   0   0   69.79   25.90
   9   0   0   69.49   26.40
  -9   0   0   93.49   21.80
   9   0   0   62.79   30.80
  -9   0   0   86.79   29.50
  -9   0   0   93.29   21.30
  10   0   0  -39.60   17.70
 -10   0   0   10.10   17.40
  10   0   0   13.60   21.40
 -10   0   0   -0.60   11.80
 -10   0   0   -0.60   12.10
  10   0   0  -39.30   18.00
 -11   0   0  -30.40   14.40
  11   0   0  -23.20   26.40
 -11   0   0    7.60   12.80
 -11   0   0    7.60   13.10
 -12   0   0  -30.80   17.90
 -12   0   0   -6.40   16.10
  12   0   0  -21.60   34.00
 -12   0   0   -6.40   16.50
   2  -1   0 1507.75   92.59
  -2  -1   0 1452.65   90.69
  -2  -1   0 1458.65   91.19
   2  -1   0 1520.15   92.29
   2   1   0 1482.05   91.39
  -2   1   0 1616.24   89.99
   2   1   0 1472.75   90.89
  -2   1   0 1615.94   89.69
   3  -1   0  222.38   23.00
   3  -1   0  223.58   22.70
  -3  -1   0  233.28   22.80
  -3  -1   0  232.18   22.40
   3   1   0  231.48   22.40
  -3   1   0  252.57   20.90
   3   1   0  233.28   22.90
  -3   1   0  250.77   20.50
  -4  -1   0  482.35   41.60
   4  -1   0  511.05   42.80
   4  -1   0  513.95   42.40
  -4  -1   0  480.35   41.00
   4   1   0  549.85   43.50
  -4   1   0  561.64   39.50
   4   1   0  545.65   42.80
  -4   1   0  566.14   40.10
   5  -1   0  294.17   34.90
  -5  -1   0  406.56   36.90
   5  -1   0  295.67   34.50
  -5  -1   0  405.06   36.20
  -5   1   0  396.76   33.40
  -5   1   0  394.16   32.80
   5   1   0  397.66   36.40
   5   1   0  400.06   37.10
  -6  -1   0  488.85   44.10
  -6  -1   0  487.25   43.30
   6  -1   0  426.66   44.20
   6  -1   0  428.96   43.70
   6   1   0  453.95   44.20
  -6   1   0  461.15   39.60
   6   1   0  378.66   58.39
  -6   1   0  458.65   38.90
   6   1   0  452.25   43.40
   7  -1   0  648.14   59.79
  -7  -1   0  649.43   57.59
  -7  -1   0  647.84   56.79
   7  -1   0  644.04   60.49
  -7   1   0  817.12   56.79
   7   1   0  628.94   59.59
   7   1   0  569.44   68.29
  -7   1   0  820.62   57.69
   7   1   0  627.64   58.69
   8  -1   0  266.47   44.00
  -8  -1   0  347.47   55.99
   8  -1   0  268.37   43.40
  -8  -1   0  344.47   39.20
  -8  -1   0  343.77   38.40
  -8   1   0  256.17   31.50
   8   1   0  257.87   49.10
   8   1   0  355.16   49.20
  -8   1   0  257.07   32.10
   8   1   0  355.26   48.20
   9  -1   0  128.39   33.50
  -9  -1   0  200.48   32.00
   9  -1   0  145.19   34.40
  -9  -1   0  200.18   31.30
   9  -1   0  129.39   33.00
  -9  -1   0  165.98   41.40
   9   1   0  191.38   35.80
   9   1   0  190.88   36.50
  -9   1   0  101.69   21.70
   9   1   0  161.78   42.20
  -9   1   0  101.89   22.20
 -10  -1   0  138.29   40.60
  10  -1   0   62.09   31.10
  10  -1   0   64.09   29.90
  10  -1   0   62.69   30.60
 -10  -1   0  123.59   28.30
 -10  -1   0  123.79   29.00
 -10   1   0  139.59   27.60
 -10   1   0  139.39   26.90
 -10   1   0  106.19   33.10
  10   1   0   50.19   28.40
  11  -1   0   75.19   38.20
 -11  -1   0  145.59   32.50
 -11  -1   0  147.69   42.70
 -11  -1   0  145.49   31.70
  11   1   0   76.09   40.50
 -11   1   0  130.79   27.30
 -11   1   0  130.69   26.70
 -11   1   0  185.88   47.70
 -12  -1   0  125.09   39.70
 -12  -1   0   -7.20   15.90
 -12  -1   0   -7.20   15.60
  12  -1   0   -8.80   38.40
 -12   1   0   21.60   19.60
 -12   1   0   21.60   20.10
 -12   1   0   65.29   36.00
  12   1   0   24.30   41.00
  -1  -2   0 2219.58  138.59
   1  -2   0 2248.58  130.89
  -1  -2   0 2047.30  128.19
   1  -2   0 2216.58  131.09
  -1  -2   0 2045.10  127.79
   1   2   0 2265.97  129.09
   1   2   0 2261.37  128.59
   1   2   0 2164.48  138.49
   1   2   0 2418.66  127.89
  -2  -2   0 8513.55  461.45
   2  -2   0 8124.59  462.15
  -2  -2   0 8530.95  462.05
   2  -2   0 8222.78  461.85
  -2  -2   0 8916.81  463.45
   2   2   0 8328.37  461.05
   2   2   0 8713.93  478.35
   2   2   0 8365.96  461.75
  -2   2   0 7753.82  461.35
  -2   2   0 7656.33  461.55
   3  -2   0  807.32   60.49
  -3  -2   0  825.42   57.79
  -3  -2   0  823.22   57.19
   3  -2   0  817.82   60.19
   3   2   0  707.53   55.49
  -3   2   0  852.01   55.89
   3   2   0  711.83   56.09
  -3   2   0  849.12   56.39
  -4  -2   0  636.74   48.50
   4  -2   0  486.15   48.70
   4  -2   0  480.45   49.00
  -4  -2   0  634.94   47.80
  -4   2   0  632.94   42.70
   4   2   0  527.45   46.30
   4   2   0  523.45   45.50
  -4   2   0  636.14   43.30
   5  -2   0  764.22   65.39
  -5  -2   0  774.72   61.69
   5  -2   0  756.42   65.79
  -5  -2   0  776.72   62.49
   5   2   0  850.61   63.69
  -5   2   0  820.92   56.39
   5   2   0  857.61   64.79
  -5   2   0  827.62   57.09
   6  -2   0    6.40   13.10
  -6  -2   0    7.60    7.30
   6  -2   0    6.40   13.30
  -6  -2   0    7.70    7.50
  -6   2   0   26.40    9.00
   6   2   0   34.00   14.40
  -6   2   0   26.20    8.80
   6   2   0   34.20   14.80
  -7  -2   0  124.79   26.90
  -7  -2   0  162.18   36.10
  -7  -2   0  124.49   26.30
   7  -2   0   91.39   28.60
   7  -2   0   92.19   28.20
   7   2   0  165.58   31.40
  -7   2   0  157.68   24.70
   7   2   0  164.78   30.60
  -7   2   0  156.78   24.00
   7   2   0  109.29   36.10
   8  -2   0   29.50   20.40
  -8  -2   0   61.29   19.90
  -8  -2   0   71.19   26.00
   8  -2   0   29.20   20.60
  -8  -2   0   61.19   19.50
   8   2   0  117.99   28.10
   8   2   0  117.69   27.40
   8   2   0   80.79   33.10
  -8   2   0   83.99   18.60
  -8   2   0   84.29   19.10
  -9  -2   0  -11.60   10.80
  -9  -2   0   26.80   19.60
   9  -2   0  -14.60   19.20
   9  -2   0   14.00   15.80
  -9  -2   0  -11.60   10.60
   9  -2   0   14.10   15.60
   9   2   0   29.00   25.80
  -9   2   0   30.50   10.70
  -9   2   0   30.40   10.50
   9   2   0    7.40   14.80
   9   2   0    7.40   14.40
 -10  -2   0   12.30   15.50
 -10  -2   0   12.20   15.20
  10  -2   0   33.30   20.50
  10  -2   0   13.00   20.30
  10  -2   0   32.90   20.70
 -10  -2   0    0.20   22.00
 -10   2   0   -3.90   10.10
  10   2   0  -20.50   26.90
 -10   2   0   -3.90    9.80
  11  -2   0   -2.50   24.10
 -11  -2   0   -8.40   13.00
 -11  -2   0   -8.40   12.70
  11  -2   0   -4.80   26.90
  11  -2   0   -2.40   24.30
 -11  -2   0   37.40   28.30
  11   2   0   38.10   33.60
 -11   2   0   23.30   18.60
 -11   2   0   -9.60   11.70
 -11   2   0   -9.50   11.40
 -12  -2   0  -28.70   18.40
 -12  -2   0  -28.70   18.00
  12  -2   0    7.60   33.50
 -12  -2   0   25.50   27.50
 -12   2   0  -12.30   12.60
  12   2   0   13.30   34.60
 -12   2   0  -12.30   12.90
 -12   2   0   11.70   21.40
   0  -3   0   -5.10    3.30
   0  -3   0   -5.10    3.40
   0  -3   0   -3.90    5.00
   0  -3   0   -1.00    2.30
   0   3   0   -3.30    4.80
   0   3   0   -3.70    3.60
   0   3   0    4.90    3.70
   0   3   0   -3.70    3.70
   1  -3   0 1652.43  105.09
  -1  -3   0 1686.03  100.29
  -1  -3   0 1635.44   96.79
  -1  -3   0 1685.43   99.69
  -1  -3   0 1583.04  111.79
   1  -3   0 1617.24  105.09
  -1   3   0 1633.14   95.69
  -1   3   0 1631.74   95.29
   1   3   0 1523.55   99.29
   1   3   0 1521.25   98.79
  -1   3   0 1609.94  105.19
   1   3   0 1559.64  111.69
   1   3   0 1663.73   96.69
  -1   3   0 1557.54   93.19
  -1   3   0 1632.64  104.89
  -2  -3   0 1020.50   68.99
  -2  -3   0 1019.20   68.39
  -2  -3   0  881.41   78.79
   2  -3   0  934.51   69.49
   2  -3   0  945.51   69.19
  -2  -3   0 1029.20   67.99
  -2   3   0 1035.50   72.09
   2   3   0 1154.48   87.09
   2   3   0 1001.00   67.89
   2   3   0 1004.30   68.59
  -2   3   0 1023.20   72.39
   3  -3   0  370.16   35.30
  -3  -3   0  349.27   33.30
   3  -3   0  374.36   35.00
  -3  -3   0  348.67   32.80
  -3  -3   0  367.16   34.90
   3   3   0  314.87   31.40
   3   3   0  401.56   56.99
   3   3   0  316.47   32.00
  -3   3   0  335.67   34.70
  -3   3   0  339.47   34.40
   4  -3   0  203.98   32.90
   4  -3   0  206.58   32.60
  -4  -3   0  167.28   27.10
  -4  -3   0  167.68   27.70
  -4  -3   0  207.08   32.20
  -4   3   0  243.98   26.50
  -4   3   0  243.08   26.90
   4   3   0  197.78   42.70
   4   3   0  238.48   26.60
   4   3   0  239.98   27.20
   5  -3   0  389.66   47.40
  -5  -3   0  514.55   51.09
  -5  -3   0  451.05   45.10
  -5  -3   0  450.25   44.30
   5  -3   0  394.76   47.10
   5   3   0  528.25   47.30
   5   3   0  491.15   72.89
   5   3   0  524.15   46.20
  -6  -3   0  108.19   23.60
   6  -3   0  107.89   26.70
   6  -3   0  109.29   26.50
  -6  -3   0  108.29   24.10
  -6  -3   0  120.59   27.70
  -6   3   0  129.89   21.10
   6   3   0  150.28   42.60
   6   3   0  169.28   30.10
  -6   3   0  128.79   20.60
   6   3   0  167.88   29.20
   7  -3   0  226.48   44.40
   7  -3   0  229.38   43.90
  -7  -3   0  191.38   33.10
  -7  -3   0  191.78   33.80
  -7  -3   0  266.57   47.70
  -7   3   0  237.78   25.30
   7   3   0  231.88   37.90
   7   3   0  233.58   39.00
  -7   3   0  239.28   25.90
  -8  -3   0  168.88   38.80
   8  -3   0  137.89   36.40
  -8  -3   0  255.57   40.80
  -8  -3   0  255.97   41.70
   8  -3   0  136.19   36.80
   8   3   0  251.07   43.20
  -8   3   0  244.98   27.00
   8   3   0  249.78   42.10
  -8   3   0  243.68   26.40
   9  -3   0  189.48   40.40
  -9  -3   0  312.97   47.30
  -9  -3   0  313.27   48.40
  -9  -3   0  280.07   55.59
   9  -3   0  191.88   40.00
   9   3   0  275.47   62.09
  -9   3   0  330.27   34.00
  -9   3   0  329.17   33.30
 -10  -3   0   23.60   17.30
  10  -3   0   62.89   24.80
  10  -3   0   26.90   24.20
 -10  -3   0   69.69   21.10
  10  -3   0   27.20   24.00
 -10  -3   0   69.79   21.70
 -10   3   0   46.30   15.40
 -10   3   0   46.20   15.00
  10   3   0   39.50   28.30
 -11  -3   0   67.59   28.10
 -11  -3   0   39.60   28.80
  11  -3   0   45.90   27.80
  11  -3   0   34.70   26.20
  11  -3   0   35.10   26.00
 -11  -3   0   67.49   27.40
  11   3   0   37.60   34.40
 -11   3   0   73.69   18.20
 -11   3   0  129.59   43.30
 -11   3   0   73.59   17.80
 -12  -3   0   14.70   20.20
 -12  -3   0    3.00   26.80
  12  -3   0   65.09   36.90
 -12  -3   0   14.70   19.70
 -12   3   0   11.70   16.60
  12   3   0  -28.30   44.70
 -12   3   0   11.70   16.20
 -12   3   0  -18.60   31.80
   0  -4   0 1377.56  100.99
   0  -4   0 1354.96   86.19
   0  -4   0 1355.66   86.79
   0  -4   0 1399.76   81.89
   0   4   0 1339.87   86.39
   0   4   0 1340.17   86.89
   0   4   0 1369.76   99.69
   0   4   0 1359.56   81.39
  -1  -4   0  561.84   40.70
  -1  -4   0  544.55   56.09
  -1  -4   0  575.34   43.90
  -1  -4   0  575.44   44.40
   1  -4   0  570.74   50.99
   1   4   0  531.45   43.80
  -1   4   0  560.74   41.00
   1   4   0  483.95   53.09
  -1   4   0  586.84   52.39
   1   4   0  581.34   40.50
  -1   4   0  594.94   52.09
   1   4   0  530.75   43.20
  -1   4   0  560.44   40.50
  -2  -4   0 1510.75   97.29
   2  -4   0 1584.24  102.59
   2  -4   0 1610.24  102.29
  -2  -4   0 1511.65   98.09
  -2  -4   0 1461.55   94.69
  -2  -4   0 1291.37  110.39
   2   4   0 1403.66   96.79
   2   4   0 1369.16  112.69
  -2   4   0 1636.34  104.29
  -2   4   0 1619.24  104.79
  -2   4   0 1411.76   88.99
  -2   4   0 1413.46   89.39
   2   4   0 1399.76   96.09
  -3  -4   0  659.53   52.29
   3  -4   0  638.74   54.39
   3  -4   0  646.34   53.99
  -3  -4   0  660.23   53.09
  -3  -4   0  707.83   53.49
  -3   4   0  583.64   54.29
   3   4   0  585.54   51.29
  -3   4   0  591.44   53.99
   3   4   0  582.94   50.49
   3   4   0  625.64   68.09
   4  -4   0  552.84   53.09
  -4  -4   0  544.05   50.19
  -4  -4   0  544.75   50.89
  -4  -4   0  523.55   51.69
   4  -4   0  558.84   52.69
   4   4   0  721.13   75.39
   4   4   0  548.45   50.19
  -4   4   0  722.13   56.39
  -4   4   0  715.43   56.99
   4   4   0  551.54   51.09
  -5  -4   0  654.63   62.69
  -5  -4   0  725.43   67.19
   5  -4   0  845.72   70.09
  -5  -4   0  653.73   61.89
   5  -4   0  835.92   70.59
   5   4   0  803.52   87.69
   5   4   0  769.12   65.89
   5   4   0  763.92   64.79
  -5   4   0  945.21   64.59
  -5   4   0  947.01   63.79
   6  -4   0  228.18   37.80
  -6  -4   0  199.58   39.00
  -6  -4   0  212.98   36.40
   6  -4   0  225.38   38.20
  -6  -4   0  212.48   35.60
  -6   4   0  270.97   27.20
   6   4   0  267.17   42.40
  -6   4   0  272.47   27.80
   6   4   0  196.28   51.59
   6   4   0  264.97   41.20
   7  -4   0   13.10   17.40
  -7  -4   0   -4.80   14.80
   7  -4   0   13.30   17.20
  -7  -4   0   10.70   12.00
  -7  -4   0   10.70   11.80
  -7   4   0   10.20    8.00
   7   4   0   28.10   22.60
   7   4   0   25.20   17.20
  -7   4   0   10.10    7.70
   7   4   0   25.00   16.70
   8  -4   0    6.20   19.20
  -8  -4   0    2.50   12.00
   8  -4   0    6.10   19.40
  -8  -4   0    9.00   12.50
  -8  -4   0    8.90   12.20
  -8   4   0   34.10   10.10
   8   4   0   13.00   13.50
   8   4   0   16.90   29.20
  -8   4   0   34.30   10.40
   8   4   0   13.00   13.90
  -9  -4   0   18.00   17.10
  -9  -4   0   18.00   17.60
   9  -4   0    4.00   19.90
   9  -4   0    3.90   20.20
  -9  -4   0    1.20   19.10
  -9   4   0    4.10    8.50
  -9   4   0    4.00    8.30
  10  -4   0   53.79   22.70
  10  -4   0   50.69   22.80
 -10  -4   0   17.30   14.80
 -10  -4   0   17.30   14.40
  10  -4   0   50.09   23.00
 -10  -4   0   15.80   17.20
 -10   4   0    7.80   12.50
  10   4   0  -25.30   29.50
 -10   4   0    7.80   12.20
 -11  -4   0  -11.10   14.70
 -11  -4   0  -11.10   15.10
 -11  -4   0   11.20   20.80
  11  -4   0  -17.20   24.30
  11  -4   0    8.50   26.30
  11  -4   0  -17.00   24.50
 -11   4   0    0.80   10.60
 -11   4   0  -16.20   18.90
 -11   4   0    0.80   10.90
  11   4   0   -8.80   36.20
 -12  -4   0  -17.20   30.80
  12  -4   0   -9.10   29.20
 -12  -4   0  -12.70   16.70
 -12  -4   0  -12.80   17.10
 -12   4   0   27.90   33.10
 -12   4   0  -25.70   12.80
  12   4   0  -38.10   40.20
 -12   4   0  -25.70   13.10
   0  -5   0    6.60   10.50
   0  -5   0    6.20    4.40
   0  -5   0   -3.30    4.00
   0  -5   0   -3.30    4.10
   0   5   0   15.80   14.90
   0   5   0    0.90    4.10
   0   5   0   -1.40    3.10
   0   5   0    0.90    4.20
   1  -5   0  243.48   37.90
  -1  -5   0  179.38   27.10
  -1  -5   0  160.48   18.40
   1  -5   0  164.58   15.70
  -1  -5   0  170.98   37.20
  -1  -5   0  179.28   26.60
   1   5   0  161.08   35.90
  -1   5   0  171.08   19.40
   1   5   0  167.28   25.50
  -1   5   0  150.58   15.90
   1   5   0  166.98   24.90
  -1   5   0  148.39   31.60
  -1   5   0  171.08   19.80
   1   5   0  164.88   18.10
  -1   5   0  149.79   31.40
  -2  -5   0   61.29   20.10
  -2  -5   0   28.50   10.20
  -2  -5   0   46.20   12.10
   2  -5   0   38.00   15.60
  -2  -5   0   28.50   10.00
   2  -5   0   39.20   15.60
  -2   5   0   38.30    9.90
  -2   5   0   41.50   17.70
  -2   5   0   41.90   17.50
  -2   5   0   42.60   10.20
   2   5   0   17.80   17.60
  -2   5   0   38.40   10.10
   2   5   0   50.19   13.50
   2   5   0   50.29   13.80
   2   5   0   48.40   11.90
  -3  -5   0  158.68   28.30
  -3  -5   0  115.69   23.90
   3  -5   0  164.08   30.30
  -3  -5   0  158.58   27.70
   3  -5   0  163.28   30.50
   3   5   0  203.68   46.10
  -3   5   0  156.18   34.50
   3   5   0  162.08   27.80
   3   5   0  161.38   27.20
  -3   5   0  158.08   34.20
  -4  -5   0  439.66   43.80
   4  -5   0  420.16   45.60
  -4  -5   0  439.96   44.60
  -4  -5   0  439.66   44.90
   4  -5   0  415.06   45.90
   4   5   0  496.75   45.70
   4   5   0  418.96   71.19
  -4   5   0  381.76   45.30
  -4   5   0  376.86   45.70
   4   5   0  499.25   46.60
  -5  -5   0  346.37   41.10
   5  -5   0  361.06   49.99
  -5  -5   0  346.07   40.30
  -5  -5   0  365.16   51.09
   5  -5   0  357.26   50.49
  -5   5   0  361.66   42.10
   5   5   0  315.97   65.19
   5   5   0  367.96   49.40
  -5   5   0  364.16   41.50
   5   5   0  370.36   50.69
  -6  -5   0  385.26   46.10
  -6  -5   0  402.96   57.59
   6  -5   0  371.06   53.99
  -6  -5   0  385.06   45.30
   6  -5   0  374.96   53.39
   6   5   0  236.08   62.79
  -6   5   0  535.15   43.30
  -6   5   0  535.45   44.10
   6   5   0  396.96   46.40
   6   5   0  399.96   47.50
   7  -5   0  416.56   57.69
  -7  -5   0  506.95   55.79
  -7  -5   0  380.26   45.10
  -7  -5   0  380.56   46.00
   7  -5   0  411.86   58.29
   7   5   0  354.96   50.99
   7   5   0  357.96   52.29
   7   5   0  390.96   73.69
   8  -5   0  149.99   33.90
  -8  -5   0  150.18   32.00
  -8  -5   0  150.38   32.70
  -8  -5   0  151.18   38.70
   8  -5   0  151.58   33.60
   8   5   0  119.59   33.60
  -8   5   0  177.38   23.70
  -8   5   0  178.68   24.40
   8   5   0  120.49   34.50
   8   5   0  166.38   49.10
  -9  -5   0   82.29   26.10
  -9  -5   0   74.89   29.30
  -9  -5   0   82.19   25.50
   9  -5   0   61.19   26.80
   9  -5   0   60.49   27.10
  -9   5   0  101.59   17.50
  -9   5   0  102.69   18.00
   9   5   0  123.79   29.00
   9   5   0   52.59   37.40
   9   5   0  124.59   29.90
 -10  -5   0   70.19   25.70
 -10  -5   0   70.19   26.30
 -10  -5   0   17.80   19.10
  10  -5   0   12.60   21.90
  10  -5   0   12.40   22.20
  10  -5   0   65.19   18.40
 -10   5   0   38.60   12.70
 -10   5   0   38.50   12.40
  10   5   0   59.99   41.10
 -11  -5   0   23.00   32.20
 -11  -5   0   60.19   26.90
  11  -5   0   74.09   25.30
 -11  -5   0   59.99   27.50
 -11   5   0   92.29   18.10
 -11   5   0   92.39   18.60
 -12  -5   0   21.90   24.30
  12  -5   0   15.60   26.70
 -12  -5   0   22.00   23.80
 -12  -5   0   34.90   42.90
  12   5   0   20.80   50.19
 -12   5   0   16.20   13.40
 -12   5   0   16.40   13.10
 -12   5   0   57.59   33.30
   0  -6   0  821.42   79.19
   0  -6   0  848.62   63.59
   0  -6   0  849.22   64.39
   0   6   0  879.21   56.89
   0   6   0  832.02   79.89
   0   6   0  839.32   64.19
   0   6   0  838.92   63.49
   1  -6   0   29.40   16.40
   1  -6   0   26.20    7.40
  -1  -6   0   46.90   11.90
  -1  -6   0   42.90   14.20
  -1  -6   0   42.80   13.90
  -1  -6   0   28.40   14.00
  -1   6   0   44.30   21.20
   1   6   0   44.10   13.60
   1   6   0   44.10   13.90
  -1   6   0   45.10   21.30
  -1   6   0   34.60   10.50
  -1   6   0   34.60   10.30
   1   6   0   54.89   11.90
  -1   6   0   43.20    9.90
   1   6   0   52.39   22.20
  -2  -6   0   54.29   13.40
  -2  -6   0   52.29   15.60
  -2  -6   0   52.29   15.30
   2  -6   0   47.90   20.20
  -2   6   0   57.99   12.70
  -2   6   0   57.89   12.40
   2   6   0   51.99   26.40
  -2   6   0   66.09   13.20
   2   6   0   83.49   19.20
   2   6   0   53.19   13.10
  -2   6   0   40.10   19.80
  -2   6   0   40.60   19.60
   2   6   0   83.69   19.70
  -3  -6   0  470.75   45.80
   3  -6   0  446.26   48.40
   3  -6   0  435.16   48.40
  -3  -6   0  470.95   46.50
  -3  -6   0  467.35   43.90
   3   6   0  446.16   45.50
  -3   6   0  465.75   37.70
  -3   6   0  393.36   56.59
  -3   6   0  389.16   57.19
   3   6   0  406.96   71.59
   3   6   0  447.66   46.40
  -3   6   0  465.35   37.10
  -4  -6   0  752.42   64.89
  -4  -6   0  752.72   65.89
   4  -6   0  756.52   67.39
  -4  -6   0  732.63   64.69
   4  -6   0  765.52   67.09
  -4   6   0  658.13   68.69
  -4   6   0  666.93   68.29
   4   6   0  740.13   65.39
   4   6   0  721.53  101.39
   4   6   0  736.63   64.19
  -5  -6   0  116.89   26.90
   5  -6   0  119.39   29.70
  -5  -6   0  116.79   26.30
  -5  -6   0   61.89   19.60
   5  -6   0  117.79   29.90
  -5   6   0  148.09   34.50
  -5   6   0  149.69   34.10
   5   6   0  123.19   28.90
   5   6   0  144.99   46.00
   5   6   0  123.89   29.80
   6  -6   0  118.99   26.20
   6  -6   0  117.59   26.50
  -6  -6   0   72.99   24.90
  -6  -6   0  131.99   32.20
  -6  -6   0   72.89   24.40
   6   6   0  103.79   24.80
   6   6   0  104.59   25.50
   6   6   0  120.39   38.60
  -6   6   0  194.68   33.70
  -6   6   0  193.78   34.30
  -7  -6   0  -16.20    9.90
  -7  -6   0    6.10    7.70
   7  -6   0   -8.10   17.20
   7  -6   0   -8.00   17.40
  -7  -6   0    6.00    7.50
   7   6   0    7.00   11.40
  -7   6   0    6.70   10.40
  -7   6   0    6.60   10.20
   7   6   0  -24.80   14.70
   7   6   0    7.30   11.80
   8  -6   0    1.50   19.90
  -8  -6   0   14.60   16.90
  -8  -6   0   24.00   19.80
  -8  -6   0   14.60   17.20
   8  -6   0    1.50   19.70
  -8   6   0   -3.30    7.70
  -8   6   0   -3.30    7.50
   8   6   0   26.70   13.40
   8   6   0  -11.70   28.80
   8   6   0   26.90   13.80
  -9  -6   0   60.99   26.80
  -9  -6   0   60.99   27.40
   9  -6   0   37.60   20.10
  -9  -6   0   45.90   30.10
   9  -6   0   37.20   20.40
   9   6   0   -2.70   17.40
  -9   6   0   51.09   13.80
   9   6   0   -2.70   18.00
   9   6   0    5.00   28.90
  -9   6   0   50.79   13.40
  10  -6   0    4.00   20.00
  10  -6   0    4.10   19.70
 -10  -6   0   15.90   17.70
 -10  -6   0   15.90   18.20
 -10  -6   0   -5.10   18.00
  10   6   0   16.00   30.20
 -10   6   0    6.20    8.50
 -10   6   0    6.20    8.70
 -11  -6   0    2.80   36.40
 -11  -6   0  -11.40   18.30
 -11  -6   0  -11.40   18.70
  11  -6   0  -32.90   20.80
  11   6   0  -46.70   33.00
 -11   6   0   -3.50    9.20
 -11   6   0   -3.60    9.00
 -12  -6   0  -22.70   20.90
 -12  -6   0  -22.80   21.40
 -12  -6   0  -34.30   21.80
 -12   6   0  -16.70    9.10
 -12   6   0  -11.60   24.20
 -12   6   0  -16.70    8.90
   0  -7   0   12.30    6.10
   0  -7   0    1.20    4.90
   0  -7   0   -6.20   13.10
   0  -7   0    1.20    4.70
   0   7   0    7.20    8.40
   0   7   0    7.20    8.60
   0   7   0    5.70   12.60
   0   7   0    4.80   12.70
   0   7   0    4.40    4.30
   1  -7   0   71.29   17.50
   1  -7   0   52.79   22.70
   1  -7   0   92.09   14.80
  -1  -7   0   96.59   21.50
  -1  -7   0   85.49   16.40
  -1  -7   0   98.09   31.20
  -1  -7   0   96.69   22.00
   1  -7   0   71.19   17.10
  -1   7   0   97.29   20.40
  -1   7   0   40.90   22.70
  -1   7   0   43.70   22.80
  -1   7   0   97.19   19.90
   1   7   0  111.99   23.50
  -1   7   0   94.99   15.20
   1   7   0   95.79   17.30
   1   7   0  112.19   24.10
   1   7   0   39.70   22.60
   2  -7   0   90.39   29.30
  -2  -7   0   99.59   22.60
  -2  -7   0   79.59   33.30
  -2  -7   0   89.59   19.00
  -2  -7   0   99.59   23.10
   2   7   0  117.29   25.10
   2   7   0  117.59   25.70
  -2   7   0  122.29   18.50
  -2   7   0   87.89   18.30
  -2   7   0   87.79   17.90
  -2   7   0   72.19   27.70
   2   7   0   89.19   18.90
  -2   7   0   73.09   27.40
   2   7   0   99.39   34.90
  -3  -7   0  390.96   72.79
  -3  -7   0  444.26   42.90
   3  -7   0  424.76   49.70
  -3  -7   0  466.65   47.60
  -3  -7   0  466.55   46.70
   3   7   0  405.46   45.10
   3   7   0  404.06   44.30
   3   7   0  422.36   74.29
  -3   7   0  411.16   38.00
  -3   7   0  416.56   59.09
  -3   7   0  407.76   37.20
  -3   7   0  410.96   37.50
  -3   7   0  412.36   59.79
  -4  -7   0  485.95   53.09
  -4  -7   0  486.05   53.99
   4  -7   0  566.94   59.39
  -4  -7   0  501.35   51.79
   4  -7   0  549.54   59.39
  -4   7   0  611.64   64.99
   4   7   0  579.34   56.79
  -4   7   0  619.34   64.39
  -4   7   0  507.75   42.50
   4   7   0  461.95   85.89
  -4   7   0  508.25   43.10
   4   7   0  581.94   57.99
   5  -7   0  116.79   30.60
   5  -7   0  116.79   30.40
  -5  -7   0  182.28   35.90
  -5  -7   0  100.69   25.70
  -5  -7   0  100.79   26.20
  -5   7   0  114.49   19.70
   5   7   0  141.69   34.20
   5   7   0  140.89   33.20
  -5   7   0  135.19   33.90
   5   7   0  132.89   47.20
  -5   7   0  136.89   33.60
  -5   7   0  114.39   19.30
  -6  -7   0   96.19   26.30
   6  -7   0   84.29   25.50
   6  -7   0   83.89   25.40
  -6  -7   0   96.19   26.90
  -6  -7   0  124.89   33.70
   6   7   0   78.49   40.80
  -6   7   0   95.89   26.30
   6   7   0  141.69   32.70
  -6   7   0   96.69   25.90
   6   7   0  142.59   33.70
  -7  -7   0   89.59   25.30
  -7  -7   0   90.99   25.50
  -7  -7   0   89.59   25.90
   7  -7   0   56.19   25.40
   7  -7   0   56.89   25.10
   7   7   0   70.69   20.90
   7   7   0   76.29   40.40
   7   7   0   71.39   21.50
  -7   7   0   51.39   18.40
  -7   7   0   51.39   18.80
  -8  -7   0   53.59   25.60
  -8  -7   0   53.59   26.10
   8  -7   0   75.49   26.00
   8  -7   0   76.59   25.80
  -8  -7   0   85.09   28.20
   8   7   0   62.99   22.50
  -8   7   0   78.99   18.30
   8   7   0   63.49   23.20
   8   7   0   98.89   53.49
  -8   7   0   78.49   17.80
  -9  -7   0   18.90   16.70
   9  -7   0   36.70   21.20
  -9  -7   0   49.30   24.90
   9  -7   0   37.30   21.00
  -9  -7   0   18.90   17.10
   9   7   0   23.70   22.50
  -9   7   0   23.00    9.40
   9   7   0   16.40   31.30
  -9   7   0   23.20    9.70
   9   7   0   23.70   23.20
 -10  -7   0   30.00   27.70
 -10  -7   0   -7.10   14.50
 -10  -7   0   -7.10   14.90
  10  -7   0   25.40   16.30
  10  -7   0   25.70   16.10
 -10   7   0   17.50    9.30
 -10   7   0   17.60    9.60
  10   7   0   44.20   30.70
 -11  -7   0   -0.40   20.20
 -11  -7   0  -55.99   29.40
  11  -7   0    8.70   15.30
 -11  -7   0   -0.40   20.60
 -11   7   0   25.80    8.60
  11   7   0  -27.40   37.60
 -11   7   0   25.90    8.80
 -12  -7   0   10.50   22.50
 -12  -7   0   10.60   23.00
  12   7   0    2.40   38.70
   0  -8   0  352.96   38.40
   0  -8   0  371.36   65.29
   0  -8   0  330.37   30.70
   0  -8   0  352.66   37.70
   0   8   0  335.37   37.80
   0   8   0  311.57   59.59
   0   8   0  321.77   29.70
   0   8   0  335.07   37.10
   0   8   0  318.57   59.49
  -1  -8   0  306.07   62.49
   1  -8   0  372.16   39.60
  -1  -8   0  346.47   39.80
   1  -8   0  371.76   38.90
   1  -8   0  343.57   30.20
   1  -8   0  331.37   60.79
  -1  -8   0  346.27   39.10
  -1  -8   0  346.77   34.20
  -1   8   0  334.07   59.79
   1   8   0  396.36   69.99
  -1   8   0  403.06   32.30
  -1   8   0  361.56   37.90
   1   8   0  338.87   39.80
   1   8   0  407.56   34.70
  -1   8   0  339.47   59.49
   1   8   0  339.37   40.50
  -1   8   0  361.66   38.60
  -2  -8   0  842.32   94.99
  -2  -8   0  832.62   71.69
  -2  -8   0  832.42   70.69
  -2  -8   0  801.02   64.29
   2  -8   0  771.62   81.49
  -2   8   0  848.72   65.69
  -2   8   0  853.61   85.89
  -2   8   0  837.02   59.39
   2   8   0  876.31   95.29
   2   8   0  834.22   72.79
   2   8   0  830.22   63.89
   2   8   0  832.32   71.69
  -2   8   0  848.82   64.89
  -2   8   0  842.72   86.59
  -3  -8   0  585.64   60.29
   3  -8   0  598.34   68.59
  -3  -8   0  810.82  110.49
  -3  -8   0  650.83   57.99
  -3  -8   0  585.64   61.19
   3   8   0  628.44   61.79
  -3   8   0  695.23   53.29
  -3   8   0  658.53   53.39
   3   8   0  618.74   96.39
  -3   8   0  811.12   78.39
  -3   8   0  801.82   79.09
   3   8   0  630.44   62.89
  -3   8   0  658.83   54.09
   4  -8   0  214.88   42.40
  -4  -8   0  182.38   34.20
  -4  -8   0  140.79   34.20
  -4  -8   0  140.79   33.50
   4   8   0  158.28   54.59
   4   8   0  239.48   42.00
  -4   8   0  239.08   26.30
   4   8   0  240.58   43.10
  -4   8   0  180.98   42.90
  -4   8   0  183.08   42.50
  -4   8   0  238.98   25.80
  -4   8   0  224.58   32.90
  -5  -8   0  110.59   26.80
  -5  -8   0  137.29   31.20
   5  -8   0   71.39   28.50
  -5  -8   0  110.59   27.40
   5   8   0  150.68   33.60
  -5   8   0  117.69   36.30
  -5   8   0  119.19   36.00
  -5   8   0  117.49   19.60
  -5   8   0  117.39   19.20
   5   8   0  151.58   49.60
   5   8   0  151.48   34.50
  -6  -8   0  202.48   40.10
  -6  -8   0  202.58   41.00
   6  -8   0  146.69   32.70
  -6  -8   0  183.68   38.30
   6  -8   0  141.19   32.70
   6   8   0  194.48   39.40
   6   8   0  127.49   46.80
   6   8   0  193.18   38.30
  -6   8   0  170.58   25.30
  -6   8   0  170.38   24.80
  -6   8   0  210.58   41.20
  -6   8   0  212.88   40.70
   7  -8   0   39.90   20.80
  -7  -8   0   34.30   17.80
  -7  -8   0    2.30   13.10
  -7  -8   0   34.40   18.20
   7  -8   0   40.80   20.70
  -7   8   0   36.20   18.20
   7   8   0   37.20   21.20
  -7   8   0   36.60   12.00
  -7   8   0   36.30   17.90
  -7   8   0   36.60   12.20
   7   8   0   37.60   21.90
   7   8   0   76.39   39.20
  -8  -8   0  103.69   30.60
   8  -8   0   56.29   23.20
   8  -8   0   57.09   23.20
  -8  -8   0   83.59   31.50
  -8  -8   0  103.59   29.90
  -8   8   0   80.19   17.80
  -8   8   0   67.39   18.30
  -8   8   0   80.09   17.40
  -8   8   0   67.09   17.90
   8   8   0   66.49   49.00
   8   8   0   28.50   24.60
   8   8   0   28.70   25.30
  -9  -8   0    2.00   14.90
   9  -8   0   -2.70   16.50
  -9  -8   0   17.10   13.30
  -9  -8   0   17.10   13.00
  -9   8   0   19.20    9.80
  -9   8   0   18.40   11.40
  -9   8   0   19.40   10.20
   9   8   0   12.80   23.50
  -9   8   0   18.30   11.10
   9   8   0   55.39   40.40
   9   8   0   12.70   22.80
 -10  -8   0  -27.40   16.10
 -10  -8   0  -26.00   16.80
  10  -8   0   21.70   14.20
 -10  -8   0  -26.40   17.20
 -10   8   0    8.60    8.90
 -10   8   0   -3.40    7.50
 -10   8   0   -3.50    7.70
  10   8   0  -30.40   36.60
 -10   8   0    8.60    8.70
 -11  -8   0  -61.29   34.20
 -11  -8   0   21.70   24.60
 -11  -8   0   21.70   25.20
  11   8   0  -29.00   53.39
   0  -9   0  -10.90   11.00
   0  -9   0    0.80    6.80
   0  -9   0   -1.90    5.80
   0  -9   0    0.70    7.00
   0   9   0   13.50   17.80
   0   9   0    3.00    5.70
   0   9   0    2.90    5.60
   0   9   0   -0.80    5.40
   0   9   0   16.20   17.80
  -1  -9   0  218.58   37.00
  -1  -9   0  222.68   31.30
   1  -9   0  241.28   23.80
   1  -9   0  222.68   50.69
   1  -9   0  240.88   37.10
   1  -9   0  240.58   36.30
  -1  -9   0  269.77   61.29
  -1  -9   0  218.38   36.20
  -1   9   0  250.37   56.69
  -1   9   0  249.68   37.80
   1   9   0  186.88   27.60
  -1   9   0  249.78   38.60
  -1   9   0  254.47   56.29
  -1   9   0  226.88   24.10
   1   9   0  256.17   41.00
   1   9   0  199.58   51.79
   1   9   0  256.67   41.90
  -2  -9   0  160.18   28.00
  -2  -9   0  125.59   29.50
  -2  -9   0  111.19   40.30
  -2  -9   0  125.69   30.20
   2  -9   0   95.99   33.20
   2   9   0  137.19   29.60
   2   9   0  133.89   45.10
   2   9   0  189.88   29.40
  -2   9   0  132.89   26.20
  -2   9   0   90.39   33.80
  -2   9   0   91.59   33.50
   2   9   0  137.49   30.40
  -2   9   0  110.89   20.10
  -2   9   0  132.79   25.60
  -3  -9   0  348.97   50.49
  -3  -9   0  202.08   55.79
   3  -9   0  258.47   48.30
  -3  -9   0  220.38   36.90
  -3  -9   0  348.97   49.40
   3   9   0  276.17   66.89
  -3   9   0  276.67   31.90
  -3   9   0  229.28   50.49
   3   9   0  247.38   43.70
  -3   9   0  276.67   31.30
  -3   9   0  226.98   51.09
  -3   9   0  208.48   31.10
   3   9   0  246.48   42.60
  -4  -9   0  171.78   34.60
   4  -9   0   72.79   33.50
  -4  -9   0  197.78   36.90
  -4  -9   0  171.78   35.40
  -4   9   0  221.68   50.79
  -4   9   0  224.08   50.19
   4   9   0  246.98   41.90
  -4   9   0  180.08   29.30
  -4   9   0  153.38   27.30
   4   9   0  158.48   54.89
   4   9   0  247.98   43.00
  -4   9   0  179.98   28.70
  -5  -9   0  284.37   50.99
  -5  -9   0  284.27   49.90
  -5  -9   0  329.77   51.19
   5  -9   0  278.27   50.99
  -5   9   0  260.37   31.70
  -5   9   0  260.27   31.20
   5   9   0  241.88   68.79
   5   9   0  290.87   49.80
  -5   9   0  329.37   57.49
  -5   9   0  325.17   58.09
   5   9   0  292.37   51.09
  -5   9   0  251.07   39.90
  -6  -9   0   64.59   22.10
   6  -9   0   78.89   23.70
  -6  -9   0   84.39   25.60
  -6  -9   0   84.29   25.00
  -6   9   0   61.69   15.00
   6   9   0   75.89   35.80
  -6   9   0   38.20   24.30
   6   9   0   57.59   23.80
  -6   9   0   61.59   14.60
  -6   9   0   37.80   24.60
   6   9   0   57.99   24.50
  -7  -9   0  198.08   41.50
   7  -9   0  192.68   37.20
  -7  -9   0  198.18   42.40
  -7  -9   0  225.48   50.29
  -7   9   0  209.68   42.60
   7   9   0  237.28   49.60
  -7   9   0  211.18   42.00
   7   9   0  226.18   70.19
   7   9   0  235.58   48.20
  -7   9   0  250.47   28.70
  -7   9   0  250.27   28.10
  -8  -9   0   62.19   29.10
  -8  -9   0   84.89   29.00
   8  -9   0   94.09   25.70
  -8  -9   0   84.89   29.70
   8   9   0   78.69   31.90
  -8   9   0   68.49   21.00
  -8   9   0   70.69   16.60
   8   9   0   77.79   31.00
  -8   9   0   68.39   21.50
  -8   9   0   70.59   16.20
   8   9   0   65.09   50.09
  -9  -9   0  102.19   27.60
  -9  -9   0  123.79   38.90
   9  -9   0  121.99   26.10
  -9  -9   0  102.29   28.20
  -9   9   0  123.79   21.30
  -9   9   0  115.89   18.60
   9   9   0   80.69   29.40
  -9   9   0  115.99   19.00
  -9   9   0  124.79   21.90
   9   9   0  142.09   58.49
   9   9   0   81.39   30.30
 -10  -9   0   39.00   27.60
 -10  -9   0   59.69   32.80
 -10  -9   0   39.00   28.30
 -10   9   0   79.29   12.10
 -10   9   0   55.09   10.60
 -10   9   0   78.89   11.80
 -10   9   0   55.09   10.80
  10   9   0   58.79   51.09
 -11  -9   0   10.70   25.10
 -11  -9   0   10.60   24.50
 -11  -9   0  -41.90   36.40
  11   9   0   26.50   55.89
   0 -10   0  298.57   65.99
   0 -10   0  246.18   39.70
   0 -10   0  246.38   40.50
   0 -10   0  285.47   29.30
   0  10   0  290.97   45.20
   0  10   0  296.67   63.39
   0  10   0  290.57   44.20
   0  10   0  301.27   63.19
   0  10   0  265.97   28.00
  -1 -10   0  851.81   71.49
   1 -10   0  807.02   55.79
  -1 -10   0  812.62   61.59
  -1 -10   0  852.41   72.69
  -1 -10   0  859.91  120.99
   1 -10   0  770.22   89.09
  -1  10   0  789.12   56.39
   1  10   0  789.82  112.39
   1  10   0  810.52  112.49
   1  10   0  729.93   69.59
  -1  10   0  598.04   63.49
   1  10   0  730.93   70.69
   1  10   0  821.82   59.99
  -1  10   0  748.33   89.39
  -1  10   0  758.92   88.89
  -1  10   0  597.54   62.59
  -2 -10   0  801.92   65.49
   2 -10   0  733.53  101.19
  -2 -10   0  925.41  107.09
  -2 -10   0  713.63   70.19
  -2 -10   0  714.03   71.19
   2  10   0  808.92   75.19
  -2  10   0  789.02   58.99
  -2  10   0  887.71   95.59
  -2  10   0  789.42   67.59
  -2  10   0  789.52   68.49
   2  10   0  806.92   73.99
   2  10   0  678.03  106.89
  -2  10   0  876.11   96.39
   2  10   0  848.62   65.29
   3 -10   0  323.87   60.59
  -3 -10   0  235.28   44.30
  -3 -10   0  306.77   43.90
  -3 -10   0  291.57   70.59
  -3 -10   0  235.08   43.40
   3  10   0  240.88   63.69
   3  10   0  251.97   46.90
   3  10   0  251.07   45.80
  -3  10   0  288.27   40.70
  -3  10   0  296.07   31.00
  -3  10   0  196.18   51.59
  -3  10   0  198.18   51.09
  -3  10   0  288.37   39.90
  -4 -10   0  462.25   55.89
   4 -10   0  507.45   73.79
  -4 -10   0  449.95   52.19
  -4 -10   0  462.25   54.89
   4  10   0  477.45   56.79
  -4  10   0  427.56   44.60
   4  10   0  489.05   94.29
  -4  10   0  422.36   69.29
  -4  10   0  482.05   45.90
  -4  10   0  417.86   69.99
   4  10   0  475.65   55.49
  -4  10   0  481.95   45.20
  -5 -10   0  344.97   55.69
  -5 -10   0  306.97   52.39
   5 -10   0  260.17   54.49
  -5 -10   0  345.07   56.89
  -5  10   0  262.77   33.00
  -5  10   0  262.77   32.40
  -5  10   0  422.06   44.20
  -5  10   0  299.87   60.59
   5  10   0  448.56   88.49
   5  10   0  379.56   59.99
  -5  10   0  303.57   59.99
   5  10   0  381.66   61.59
  -6 -10   0  124.29   34.30
   6 -10   0   91.49   31.00
  -6 -10   0  124.29   33.50
  -6 -10   0   84.19   29.40
   6  10   0   46.90   31.70
  -6  10   0   89.39   19.00
  -6  10   0   98.19   25.50
  -6  10   0   91.89   33.50
  -6  10   0   89.49   19.40
   6  10   0  190.98   44.90
  -6  10   0   92.99   33.20
   6  10   0  189.88   43.60
  -7 -10   0   85.39   26.80
  -7 -10   0   59.49   28.60
  -7 -10   0   85.49   27.40
   7 -10   0   44.80   23.10
   7  10   0   38.10   27.80
   7  10   0   51.39   35.40
  -7  10   0   60.19   26.30
   7  10   0   37.80   26.90
  -7  10   0   64.49   22.20
  -7  10   0   36.30   14.40
  -7  10   0   36.30   14.70
  -7  10   0   64.99   21.90
  -8 -10   0   30.80   20.20
  -8 -10   0   30.80   19.70
   8 -10   0   20.20   24.80
  -8 -10   0   -0.30   22.40
   8  10   0   16.30   43.50
  -8  10   0   25.20   11.50
  -8  10   0   25.20   11.80
   8  10   0   26.70   29.40
  -8  10   0   32.40   17.00
  -8  10   0   32.50   16.70
   8  10   0   26.80   30.30
   9 -10   0   10.60   16.80
  -9 -10   0   28.30   22.40
  -9 -10   0   52.09   33.10
  -9 -10   0   28.20   21.80
   9  10   0   69.59   32.40
   9  10   0   68.59   31.40
  -9  10   0   22.70   10.40
  -9  10   0   -2.50   10.80
  -9  10   0   -2.50   11.10
   9  10   0   47.30   53.79
  -9  10   0   22.60   10.70
 -10 -10   0   16.50   30.50
 -10 -10   0    3.80   20.90
 -10 -10   0    3.70   20.50
 -10  10   0    4.50    5.40
 -10  10   0    0.90    6.50
 -10  10   0    4.50    5.30
  10  10   0   67.29   60.49
 -10  10   0    0.90    6.30
 -11 -10   0   -0.70   27.50
 -11 -10   0   56.19   48.80
 -11 -10   0   -0.70   26.90
  11  10   0  -13.10   41.50
   0 -11   0   -2.30    7.40
   0 -11   0   -2.30    7.60
   0 -11   0    0.00    7.40
   0 -11   0   19.00   25.60
   0  11   0    3.20   12.80
   0  11   0    3.10    6.60
   0  11   0    3.10   13.10
   0  11   0   -3.40   16.90
   0  11   0   -3.60   17.00
  -1 -11   0   53.39   16.30
   1 -11   0   57.69   13.80
  -1 -11   0   66.89   22.90
   1 -11   0   34.60   24.60
  -1 -11   0   66.99   23.40
  -1 -11   0   50.89   32.60
  -1  11   0   23.00   15.50
  -1  11   0   70.69   36.60
   1  11   0   56.69   15.10
   1  11   0   73.59   32.50
  -1  11   0   60.29   14.50
   1  11   0   71.29   21.90
  -1  11   0   71.89   36.30
   1  11   0   80.49   32.50
  -1  11   0   23.00   15.90
   1  11   0   71.49   22.40
  -2 -11   0  110.69   50.09
   2 -11   0   83.49   35.40
  -2 -11   0   37.50   14.50
  -2 -11   0   65.89   21.90
  -2 -11   0   65.79   21.40
   2  11   0   50.89   17.40
  -2  11   0   17.90   14.90
  -2  11   0   17.90   14.50
   2  11   0   79.19   24.00
   2  11   0   79.49   24.60
  -2  11   0   43.60   14.00
  -2  11   0   52.59   29.40
  -2  11   0   53.09   29.10
   2  11   0   34.30   19.90
  -3 -11   0  237.98   69.19
   3 -11   0  242.18   54.89
  -3 -11   0  218.88   43.10
  -3 -11   0  242.78   39.90
  -3 -11   0  218.98   44.10
  -3  11   0  236.68   38.10
   3  11   0  192.28   41.10
   3  11   0  191.58   40.10
   3  11   0  379.36   83.19
  -3  11   0  277.27   61.29
  -3  11   0  274.37   61.99
  -3  11   0  254.37   33.70
  -3  11   0  236.58   37.30
  -4 -11   0   21.50   14.00
  -4 -11   0   13.20   10.60
  -4 -11   0   21.50   13.70
   4 -11   0   21.30   24.40
   4  11   0   31.40   14.70
  -4  11   0   -2.00   17.70
  -4  11   0    9.50   11.80
  -4  11   0   16.20   10.40
   4  11   0   35.80   29.30
  -4  11   0   -2.00   17.50
   4  11   0   31.40   15.10
  -4  11   0   16.20   10.60
  -5 -11   0  142.29   36.60
  -5 -11   0  142.19   35.80
   5 -11   0   89.99   38.00
  -5 -11   0  104.69   27.10
  -5  11   0   74.99   19.80
  -5  11   0   70.89   35.50
   5  11   0  167.28   41.70
  -5  11   0   74.99   20.20
  -5  11   0  141.29   28.00
   5  11   0  166.38   40.50
   5  11   0  128.49   54.29
  -5  11   0   71.79   35.10
   6 -11   0   67.79   33.30
  -6 -11   0  123.69   33.40
  -6 -11   0   78.69   30.40
  -6 -11   0  123.69   32.70
   6  11   0  137.89   37.50
  -6  11   0   52.69   29.20
  -6  11   0   51.99   29.50
   6  11   0  136.99   36.50
   6  11   0   52.09   38.30
  -6  11   0   75.79   26.50
  -6  11   0   79.09   21.40
  -6  11   0   79.09   20.90
  -7 -11   0   57.89   24.40
  -7 -11   0   78.79   28.30
  -7 -11   0   57.89   23.80
   7 -11   0   32.20   28.40
  -7  11   0   90.39   31.80
  -7  11   0   79.49   21.20
  -7  11   0   55.19   24.70
  -7  11   0   89.39   32.20
   7  11   0   64.29   32.80
  -7  11   0   79.49   21.70
   7  11   0   63.89   31.90
   7  11   0   86.09   47.60
   8 -11   0   51.89   27.70
  -8 -11   0   94.19   33.80
  -8 -11   0   94.19   33.10
  -8 -11   0  125.69   40.60
  -8  11   0  100.59   26.60
   8  11   0  151.68   51.59
   8  11   0   76.49   33.80
  -8  11   0  138.29   23.70
   8  11   0   75.99   32.80
  -8  11   0  138.29   24.20
  -8  11   0  101.19   26.10
  -8  11   0  157.38   35.20
  -9 -11   0  146.39   41.70
  -9 -11   0  146.39   42.70
  -9 -11   0   88.79   43.10
  -9  11   0   95.59   37.80
  -9  11   0  113.09   20.00
   9  11   0  175.78   73.39
  -9  11   0   92.49   19.10
  -9  11   0   92.19   18.70
  -9  11   0  112.99   19.60
 -10 -11   0  -55.69   37.80
 -10 -11   0   43.80   26.60
 -10 -11   0   43.90   27.20
  10  11   0   79.19   58.99
 -10  11   0  -34.20   28.20
   0 -12   0  760.12   73.69
   0 -12   0  794.52  120.19
   0 -12   0  741.73   58.89
   0 -12   0  760.92   74.99
   0  12   0  787.42   73.79
   0  12   0  801.32  116.19
   0  12   0  822.02  115.59
   0  12   0  754.42   58.49
   0  12   0  788.62   74.99
  -1 -12   0  416.16   85.19
  -1 -12   0  550.84   60.19
   1 -12   0  572.14   95.89
  -1 -12   0  550.34   59.09
   1 -12   0  503.85   41.10
  -1 -12   0  466.25   45.80
   1  12   0  381.36   80.49
  -1  12   0  500.25   55.09
  -1  12   0  557.34   96.49
  -1  12   0  549.05   97.29
  -1  12   0  500.85   56.09
   1  12   0  421.96   64.39
   1  12   0  394.46   80.39
   1  12   0  432.26   43.20
   1  12   0  422.96   65.79
  -1  12   0  459.85   40.90
  -2 -12   0  321.17   77.79
  -2 -12   0  249.68   46.60
  -2 -12   0  209.98   37.60
   2 -12   0  243.08   60.09
  -2 -12   0  249.38   45.50
  -2  12   0  188.18   57.19
   2  12   0  255.07   48.80
   2  12   0  358.56   81.29
   2  12   0  365.36   81.39
  -2  12   0  281.57   46.10
   2  12   0  254.37   47.60
  -2  12   0  190.58   56.69
  -2  12   0  228.48   31.80
  -2  12   0  281.17   45.10
  -3 -12   0  515.35   52.09
   3 -12   0  316.77   69.09
  -3 -12   0  416.26   64.59
  -3 -12   0  416.66   65.99
   3  12   0  476.15   70.49
  -3  12   0  443.26   47.30
  -3  12   0  443.56   48.10
   3  12   0  440.06   96.69
  -3  12   0  254.07   65.49
  -3  12   0  494.25   42.80
   3  12   0  474.35   68.89
  -3  12   0  250.57   66.19
  -4 -12   0  635.94   67.99
  -4 -12   0  517.35   58.19
   4 -12   0  345.27   72.09
  -4 -12   0  636.64   69.29
   4  12   0  698.33   72.69
  -4  12   0  512.55   84.19
  -4  12   0  522.95   55.09
  -4  12   0  495.95   49.90
  -4  12   0  522.75   54.19
  -4  12   0  507.15   85.19
   4  12   0  701.13   74.29
   4  12   0  553.24  108.39
  -5 -12   0  238.18   47.90
  -5 -12   0  259.37   50.59
   5 -12   0  163.48   45.60
  -5 -12   0  259.57   51.69
   5  12   0  148.49   52.39
  -5  12   0  162.68   50.39
  -5  12   0  189.28   35.10
  -5  12   0  289.97   43.80
  -5  12   0  189.18   34.30
   5  12   0  229.98   51.79
   5  12   0  228.78   50.49
  -5  12   0  160.68   50.89
  -6 -12   0  104.89   32.10
  -6 -12   0   90.39   30.40
  -6 -12   0  104.89   31.30
   6 -12   0   55.49   32.20
  -6  12   0   63.39   21.50
  -6  12   0   41.70   27.80
   6  12   0  117.99   38.60
  -6  12   0   41.10   28.10
   6  12   0  117.29   37.50
   6  12   0   47.80   38.70
  -6  12   0   63.29   19.30
  -6  12   0   63.29   19.80
  -7 -12   0   78.69   29.50
   7 -12   0   50.79   38.40
  -7 -12   0   38.40   22.80
  -7 -12   0   38.40   23.30
   7  12   0   87.09   34.50
  -7  12   0   52.19   29.10
   7  12   0   68.79   49.90
  -7  12   0   98.99   23.90
  -7  12   0  134.29   35.50
  -7  12   0   99.09   24.50
  -7  12   0   52.89   28.80
   7  12   0   87.69   35.50
  -8 -12   0    5.10   17.10
  -8 -12   0   48.10   25.20
  -8 -12   0    5.10   16.70
  -8  12   0   30.30   20.30
   8  12   0  -17.60   35.90
   8  12   0   -8.60   32.10
  -8  12   0   37.30   24.80
  -8  12   0   25.00   14.70
  -8  12   0   25.00   14.40
  -8  12   0   30.10   20.60
   8  12   0   -8.50   31.20
  -9 -12   0   -3.40   18.00
  -9 -12   0    2.90   32.10
  -9 -12   0   -3.40   18.40
   9 -12   0  -35.80   26.60
  -9  12   0    3.00   10.00
  -9  12   0  -19.40   24.10
  -9  12   0   28.00   16.30
   9  12   0  -57.19   60.69
  -9  12   0    3.00   10.30
  -9  12   0   28.00   16.00
 -10 -12   0  -30.20   31.10
 -10 -12   0    9.30   31.90
 -10 -12   0    9.30   32.60
 -10  12   0    5.80    6.00
 -10  12   0    2.70    4.30
 -10  12   0   34.90   34.40
 -10  12   0    5.90    6.20
 -10  12   0    2.60    4.20
  10  12   0  102.09   72.99
   0 -13   0  -13.90   31.70
   0 -13   0   -2.90   12.00
   0 -13   0   -3.00   12.30
   0 -13   0   -3.80    9.70
   0  13   0    0.60   15.40
   0  13   0   -2.70   24.00
   0  13   0    0.60   15.00
   0  13   0    1.60   23.80
   0  13   0    6.10    9.00
   1 -13   0  162.08   56.99
  -1 -13   0  105.69   44.60
  -1 -13   0  131.39   25.90
  -1 -13   0  108.59   33.70
  -1 -13   0  108.39   32.90
   1 -13   0  111.39   21.10
   1  13   0  170.88   55.39
   1  13   0  105.39   31.70
  -1  13   0   80.89   17.80
  -1  13   0  109.79   50.59
   1  13   0  169.98   55.59
  -1  13   0  106.99   32.00
   1  13   0   83.29   20.60
  -1  13   0  107.19   32.70
   1  13   0  105.09   30.90
  -1  13   0  111.09   50.19
  -2 -13   0   71.59   21.10
  -2 -13   0   84.79   22.30
  -2 -13   0   21.20   47.30
  -2 -13   0   71.69   21.60
   2 -13   0   46.70   37.90
  -2  13   0   99.29   19.70
   2  13   0  169.08   40.20
   2  13   0  123.19   43.70
  -2  13   0   57.19   36.30
  -2  13   0   44.20   19.60
   2  13   0  169.68   41.30
   2  13   0  120.49   43.70
  -2  13   0   44.30   20.10
  -2  13   0   56.39   36.70
   3 -13   0   26.90   40.50
  -3 -13   0  104.49   36.80
  -3 -13   0   71.69   22.40
  -3 -13   0  104.39   35.90
  -3  13   0   77.39   22.80
  -3  13   0   52.99   34.50
  -3  13   0   52.39   34.90
  -3  13   0   77.29   22.30
   3  13   0  113.19   32.90
  -3  13   0   94.09   21.40
   3  13   0  142.89   58.89
   3  13   0  113.59   33.70
  -4 -13   0  201.58   40.80
   4 -13   0  228.38   57.69
  -4 -13   0  181.98   42.90
  -4 -13   0  181.88   41.90
  -4  13   0  200.78   37.30
  -4  13   0  200.58   36.50
   4  13   0  233.58   77.69
  -4  13   0  190.68   52.79
   4  13   0  125.19   37.30
  -4  13   0  193.08   52.09
   4  13   0  125.79   38.30
  -4  13   0  202.78   32.90
  -5 -13   0  113.59   34.50
  -5 -13   0  113.69   35.30
   5 -13   0  141.99   48.30
  -5 -13   0   84.49   29.20
   5  13   0  128.19   35.50
  -5  13   0  158.58   30.10
  -5  13   0   96.49   26.60
  -5  13   0   32.10   29.90
   5  13   0   82.09   57.29
  -5  13   0  158.38   29.40
   5  13   0  128.79   36.50
  -5  13   0   31.70   30.20
  -6 -13   0  140.89   39.50
  -6 -13   0  124.89   36.20
  -6 -13   0  124.79   35.40
  -6  13   0  134.89   28.60
   6  13   0  197.98   45.10
   6  13   0  198.88   46.40
  -6  13   0   96.89   38.80
   6  13   0  127.99   55.79
  -6  13   0  260.67   43.00
  -6  13   0   98.09   38.40
  -6  13   0  134.99   29.20
  -7 -13   0  153.68   41.40
  -7 -13   0  117.89   43.50
  -7 -13   0  153.78   42.40
   7  13   0   83.79   30.90
   7  13   0   84.39   31.80
  -7  13   0  164.48   36.30
  -7  13   0  158.18   31.20
  -7  13   0  148.89   41.00
  -7  13   0  146.99   41.40
  -7  13   0  157.98   30.50
   7  13   0  164.38   68.19
  -8 -13   0   27.90   28.20
  -8 -13   0  109.09   39.60
  -8 -13   0  109.19   40.50
  -8  13   0  115.59   36.10
  -8  13   0   88.59   29.10
   8  13   0   52.69   41.20
   8  13   0   52.19   40.00
  -8  13   0   89.19   28.70
  -8  13   0  109.59   24.20
   8  13   0  216.88   75.99
  -8  13   0  109.49   23.60
  -9 -13   0   85.99   38.30
  -9 -13   0    1.00   25.50
  -9 -13   0    1.00   24.90
  -9  13   0   98.39   37.10
  -9  13   0   68.99   22.20
  -9  13   0   37.90   15.80
  -9  13   0   37.80   15.40
  -9  13   0   68.79   22.70
   9  13   0   21.40   53.79
   0 -14   0  213.48   46.60
   0 -14   0  287.47   81.99
   0 -14   0  213.18   45.50
   0 -14   0  264.67   30.00
   0  14   0  325.17   55.69
   0  14   0  196.38   51.89
   0  14   0  325.97   57.09
   0  14   0  202.38   51.59
   0  14   0  243.88   32.50
   1 -14   0  487.15   95.69
  -1 -14   0  436.36   48.00
  -1 -14   0  480.85   69.59
  -1 -14   0  775.42  127.89
  -1 -14   0  480.05   68.09
  -1  14   0  480.55   68.29
  -1  14   0  578.64  108.59
   1  14   0  522.45   72.89
  -1  14   0  387.16   40.10
   1  14   0  473.45   96.39
   1  14   0  521.05   71.19
   1  14   0  543.15   48.10
  -1  14   0  479.55   66.79
   1  14   0  465.95   96.69
  -1  14   0  586.24  107.69
  -2 -14   0  238.38   48.50
  -2 -14   0  238.08   47.40
  -2 -14   0  247.08   40.80
   2 -14   0  281.07   71.99
  -2 -14   0   94.79   51.49
  -2  14   0  143.89   35.00
  -2  14   0  211.88   54.39
   2  14   0  151.18   61.79
   2  14   0  223.98   46.60
  -2  14   0  209.38   54.89
  -2  14   0  144.19   35.80
   2  14   0  152.88   61.59
  -2  14   0  190.38   27.60
   2  14   0  223.28   45.40
  -3 -14   0  139.19   37.80
  -3 -14   0  139.29   38.70
  -3  14   0   69.79   22.80
  -3  14   0   69.89   23.30
   3  14   0  162.88   61.29
  -3  14   0  117.59   46.50
  -3  14   0  118.89   21.20
   3  14   0  102.09   36.10
   3  14   0  160.28   61.29
  -3  14   0  116.29   47.10
   3  14   0  101.59   35.20
  -4 -14   0   30.50   25.50
  -4 -14   0   -4.40   16.10
  -4 -14   0   30.60   26.10
  -4  14   0   55.29   20.40
  -4  14   0   -3.80   17.50
  -4  14   0   -3.80   17.00
  -4  14   0   58.69   38.80
   4  14   0   76.49   56.59
   4  14   0   33.00   32.80
  -4  14   0   59.39   38.30
   4  14   0   33.20   33.70
  -5 -14   0   61.39   29.60
  -5 -14   0  111.69   34.40
  -5 -14   0   61.29   28.90
   5  14   0   48.90   23.40
  -5  14   0  156.78   33.10
  -5  14   0   32.60   24.80
  -5  14   0   92.99   24.20
   5  14   0   48.70   22.80
  -5  14   0   32.20   24.20
   5  14   0  105.19   58.59
  -5  14   0  156.58   32.30
   6 -14   0  -18.10   31.50
  -6 -14   0  127.59   41.20
  -6 -14   0  127.49   40.20
  -6 -14   0   55.69   30.90
  -6  14   0   87.09   24.40
  -6  14   0   65.19   37.00
   6  14   0   92.39   37.60
  -6  14   0   66.09   36.60
   6  14   0  125.09   62.49
  -6  14   0   69.99   26.50
  -6  14   0   86.99   23.80
   6  14   0   92.99   38.70
  -7 -14   0    9.50   19.40
  -7 -14   0   21.90   30.30
  -7 -14   0   21.90   31.10
  -7  14   0   14.60   17.80
  -7  14   0   14.60   18.30
   7  14   0   45.80   30.60
  -7  14   0   24.30   29.50
   7  14   0   46.20   31.50
   7  14   0  -47.60   60.39
  -7  14   0   24.60   29.30
  -7  14   0   47.90   27.70
  -8 -14   0   -4.20   30.30
  -8 -14   0    5.30   30.80
  -8 -14   0   -4.20   29.60
  -8  14   0   39.90   29.70
  -8  14   0  -29.30   26.50
  -8  14   0   40.30   29.30
  -8  14   0   16.90   18.20
   8  14   0  -39.60   72.89
  -8  14   0   16.80   18.70
  -9 -14   0   12.70   22.00
  -9 -14   0   12.70   22.60
  -9 -14   0  -49.70   31.50
  -9  14   0   17.00   15.40
   9  14   0   -2.90   51.99
  -9  14   0   35.70   33.40
  -9  14   0   15.40   21.20
  -9  14   0   15.30   21.60
  -9  14   0   16.90   15.00
   0 -15   0    5.40   11.20
   0 -15   0   16.00   30.80
   0  15   0  -13.90   28.30
   0  15   0   14.90   13.30
   0  15   0   14.90   13.00
   0  15   0  -15.00    9.50
   0  15   0  -14.10   28.10
  -1 -15   0   34.80   18.30
  -1 -15   0  -17.60   27.20
  -1 -15   0   33.70   21.50
  -1 -15   0   33.60   20.90
   1 -15   0    5.20   41.70
   1  15   0   27.40   19.70
  -1  15   0   16.40   38.70
   1  15   0   27.40   20.20
  -1  15   0   13.90    9.40
  -1  15   0   12.50   21.80
  -1  15   0   16.60   38.30
   1  15   0   -4.70   24.10
   1  15   0   -1.10   23.90
  -1  15   0   12.50   22.40
  -2 -15   0   39.30   30.50
  -2 -15   0   49.20   19.10
  -2 -15   0   39.40   31.30
   2 -15   0  120.89   44.10
  -2  15   0   43.60   13.40
  -2  15   0  -37.00   32.90
  -2  15   0   61.49   25.40
  -2  15   0  -37.50   32.50
   2  15   0   25.50   24.60
   2  15   0   84.49   52.39
  -2  15   0   61.79   24.70
   2  15   0   25.70   25.30
   2  15   0   75.79   52.59
  -3 -15   0   24.10   23.50
  -3 -15   0    9.40   20.50
  -3 -15   0    9.40   20.00
   3  15   0   25.60   29.70
   3  15   0   62.49   54.49
   3  15   0   58.59   54.69
   3  15   0   25.70   28.90
  -3  15   0   33.00   14.60
  -3  15   0   41.30   23.20
  -3  15   0   69.99   45.50
  -3  15   0   41.40   23.80
  -3  15   0   70.79   44.90
  -4 -15   0   49.30   30.70
  -4 -15   0   78.89   28.90
  -4 -15   0   49.30   31.40
  -4  15   0   65.29   19.10
  -4  15   0   38.30   23.00
  -4  15   0   35.10   37.80
  -4  15   0   38.20   22.50
   4  15   0   66.99   29.10
  -4  15   0   35.40   37.30
   4  15   0   63.99   71.79
   4  15   0   89.89   71.29
   4  15   0   67.39   29.90
  -5 -15   0  164.78   42.50
  -5 -15   0  193.68   47.50
  -5 -15   0  164.98   41.50
   5  15   0  153.48   46.20
   5  15   0  144.99   64.99
  -5  15   0  135.99   48.30
  -5  15   0  186.78   35.30
  -5  15   0  134.39   48.90
   5  15   0  152.78   45.00
   5  15   0  149.88   64.99
  -5  15   0  234.48   42.70
  -5  15   0  234.78   43.80
  -6 -15   0  115.59   34.30
  -6 -15   0   96.59   46.10
  -6 -15   0   96.39   45.10
  -6  15   0   60.89   40.70
  -6  15   0  114.29   30.00
   6  15   0   99.99   66.79
   6  15   0  189.38   46.10
   6  15   0  190.58   47.40
  -6  15   0   61.69   40.30
  -6  15   0  146.39   33.90
  -6  15   0  114.09   29.30
  -7 -15   0   52.89   34.20
  -7 -15   0  -10.80   31.20
  -7 -15   0   52.99   35.10
  -7  15   0   14.60   20.20
   7  15   0    0.50   30.60
   7  15   0    0.50   31.60
  -7  15   0  -23.10   31.40
  -7  15   0   14.70   20.70
  -7  15   0  -23.40   31.00
   7  15   0   11.00   75.39
  -7  15   0   17.60   25.80
  -8 -15   0   30.20   32.10
  -8 -15   0   95.09   39.50
  -8 -15   0   95.19   40.40
  -8  15   0   79.49   34.80
  -8  15   0  102.59   39.00
  -8  15   0   90.89   25.80
  -8  15   0   91.19   26.50
  -8  15   0  103.69   38.60
   8  15   0  113.09   85.69
   0 -16   0   53.69   16.90
   0 -16   0  129.79   58.79
   0  16   0  141.39   53.59
   0  16   0   79.69   28.90
   0  16   0   79.39   28.20
   0  16   0  139.39   53.99
  -1 -16   0   59.69   51.49
   1 -16   0  139.19   52.69
  -1 -16   0  200.48   32.50
  -1 -16   0  138.49   40.10
  -1 -16   0  138.19   39.10
   1  16   0  149.99   40.10
  -1  16   0  163.88   63.29
  -1  16   0  146.09   23.80
   1  16   0  149.49   39.10
  -1  16   0  165.98   62.69
   1  16   0  227.38   66.69
  -1  16   0  226.28   47.80
  -1  16   0  226.78   48.90
   1  16   0  223.38   67.09
  -2 -16   0  203.38   38.30
   2 -16   0  132.19   57.79
  -2 -16   0  175.48   47.70
  -2 -16   0  175.18   46.60
   2  16   0  172.08   76.79
  -2  16   0  260.97   49.60
  -2  16   0  139.39   23.10
   2  16   0  165.38   77.19
  -2  16   0  138.49   67.49
   2  16   0  203.68   50.29
  -2  16   0  140.09   66.69
   2  16   0  203.08   49.00
  -2  16   0  261.37   50.69
  -3 -16   0  228.88   46.30
  -3 -16   0  156.08   41.10
  -3 -16   0  156.28   42.10
   3  16   0  168.78   48.50
   3  16   0  132.89   59.29
   3  16   0  130.79   59.39
  -3  16   0  138.89   23.20
  -3  16   0  128.19   53.09
  -3  16   0  131.09   37.00
  -3  16   0  131.39   37.90
  -3  16   0  129.49   52.49
   3  16   0  169.48   49.80
  -4 -16   0   51.59   28.90
  -4 -16   0   77.79   39.20
  -4 -16   0   77.79   38.30
   4  16   0   54.49   60.09
  -4  16   0   87.19   26.90
  -4  16   0   15.30   35.50
  -4  16   0   15.20   35.90
  -4  16   0   63.39   19.20
   4  16   0  134.59   37.10
   4  16   0   52.29   59.99
   4  16   0  135.49   38.10
  -4  16   0   87.39   27.60
  -5 -16   0   31.40   25.70
   5  16   0   21.70   35.00
   5  16   0   21.70   34.00
  -5  16   0   46.80   37.40
  -5  16   0   33.90   19.70
  -5  16   0   40.10   21.10
  -5  16   0   40.10   20.50
  -5  16   0   47.50   36.90
   5  16   0   83.49   58.09
   5  16   0   74.99   58.19
  -6 -16   0   31.30   30.10
  -6 -16   0   31.30   30.80
  -6 -16   0   19.10   31.60
  -6  16   0   57.39   26.40
  -6  16   0   67.29   37.90
  -6  16   0   65.99   38.30
  -6  16   0   32.30   22.80
  -6  16   0   57.29   25.70
   6  16   0  106.89   89.69
   6  16   0   90.89   89.89
   6  16   0   28.10   30.70
   6  16   0   28.30   31.60
  -7 -16   0   11.30   30.50
  -7 -16   0   11.30   31.30
  -7 -16   0   28.70   33.30
   7  16   0  -64.39   74.59
  -7  16   0  -11.30   20.00
   7  16   0  -78.49   74.69
   7  16   0   13.60   39.20
  -7  16   0  -11.30   20.50
   7  16   0   13.50   38.10
  -7  16   0   11.40   22.40
  -7  16   0    2.40   32.20
  -7  16   0    2.40   31.90
   0 -17   0   -8.50   10.70
   0 -17   0  -44.10   53.39
   0  17   0   12.10   35.40
   0  17   0   12.10   35.10
   0  17   0   63.69   31.60
   0  17   0   63.59   30.80
  -1 -17   0    8.60   16.30
  -1  17   0   20.20   22.10
   1  17   0  -41.60   27.50
  -1  17   0   21.20   35.40
  -1  17   0   20.20   22.70
   1  17   0   36.10   47.30
   1  17   0  -41.20   26.70
   1  17   0   36.20   47.70
  -1  17   0    5.40    9.60
  -1  17   0   20.90   35.70
  -2 -17   0    7.10   17.60
  -2 -17   0    7.10   17.20
  -2 -17   0   39.50   23.40
  -2  17   0    3.30   10.20
  -2  17   0   13.90   40.20
  -2  17   0   13.80   40.70
   2  17   0   48.20   48.90
   2  17   0   12.10   30.80
   2  17   0   11.90   30.00
  -2  17   0  -12.30   20.40
   2  17   0   54.69   48.60
  -2  17   0  -12.40   20.90
  -3 -17   0   -0.70   19.00
  -3 -17   0   26.10   25.00
  -3 -17   0   26.10   24.40
   3  17   0   -7.50   28.40
   3  17   0   -8.00   29.20
  -3  17   0   11.90   10.90
  -3  17   0    8.10   43.50
   3  17   0   63.29   54.89
   3  17   0   66.19   54.59
  -3  17   0    8.00   42.90
  -3  17   0   45.10   26.10
  -3  17   0   45.00   25.40
  -4 -17   0  104.49   41.90
  -4 -17   0    7.20   24.00
  -4 -17   0  104.59   40.90
  -4  17   0   30.30   44.60
   4  17   0  -11.00   36.70
   4  17   0   -9.80   35.70
  -4  17   0   29.60   45.20
  -4  17   0   44.90   24.50
   4  17   0  152.28   83.89
  -4  17   0   40.80   14.80
  -4  17   0   44.80   23.90
   4  17   0  149.49   84.19
  -5 -17   0   11.10   24.00
  -5 -17   0   73.59   34.60
  -5 -17   0   11.10   24.60
  -5  17   0   57.79   43.10
  -5  17   0   58.59   42.60
   5  17   0   28.90   28.20
   5  17   0   29.00   29.00
   5  17   0    4.90   55.09
  -5  17   0   80.89   28.70
   5  17   0   14.10   54.99
  -5  17   0   81.09   29.40
  -5  17   0    9.50   17.40
  -6 -17   0   45.80   33.20
  -6 -17   0   37.70   35.30
  -6 -17   0   45.80   34.00
  -6  17   0   47.70   40.90
   6  17   0   29.50   35.70
   6  17   0   69.49   76.69
  -6  17   0   47.20   41.40
  -6  17   0   79.99   30.80
  -6  17   0   80.19   31.60
   6  17   0   67.89   76.49
   6  17   0   29.30   34.70
  -6  17   0   12.20   20.30
   0  18   0   77.79   40.00
   0  18   0   79.99   52.79
   0  18   0   78.89   53.29
   0  18   0   77.99   41.10
  -1 -18   0   24.10   15.20
  -1  18   0  107.89   60.69
  -1  18   0   44.10   31.90
  -1  18   0   43.70   32.80
   1  18   0   59.39   56.39
   1  18   0   58.89   56.79
   1  18   0   80.89   31.40
  -1  18   0  106.59   61.29
   1  18   0   81.29   32.30
  -2 -18   0   42.40   28.80
  -2 -18   0  -13.10   22.90
  -2 -18   0  -13.10   23.50
   2  18   0   35.40   43.70
  -2  18   0  102.49   46.30
   2  18   0  105.89   38.20
  -2  18   0   51.99   29.20
  -2  18   0   51.89   28.50
   2  18   0   36.00   43.50
   2  18   0  105.09   37.10
  -2  18   0  101.39   46.80
  -3 -18   0   75.09   36.50
  -3 -18   0   28.80   22.40
  -3 -18   0   28.80   21.80
  -3  18   0   51.09   29.60
   3  18   0   74.59   63.89
  -3  18   0  105.39   64.79
   3  18   0   68.09   64.29
   3  18   0   64.19   34.00
   3  18   0   63.89   33.00
  -3  18   0   50.99   28.80
  -3  18   0   29.10    9.80
  -3  18   0  104.19   65.59
  -4 -18   0   31.40   30.10
  -4 -18   0   31.20   29.40
  -4 -18   0  -21.00   25.70
   4  18   0   23.50   31.50
  -4  18   0   -2.80   41.70
  -4  18   0   12.80   10.50
   4  18   0   23.80   32.40
   4  18   0   63.09   60.09
  -4  18   0   43.30   25.80
  -4  18   0   -2.90   41.20
   4  18   0   53.79   60.49
  -4  18   0   43.40   26.40
  -5 -18   0   -3.20   30.10
  -5 -18   0   92.49   41.40
  -5 -18   0   92.59   42.40
  -5  18   0   -4.80   30.40
   5  18   0   15.90   32.60
  -5  18   0    1.00   44.80
   5  18   0   79.59   87.49
  -5  18   0   22.70   14.50
  -5  18   0   -4.80   29.60
  -5  18   0    1.00   45.30
   5  18   0   15.80   31.60
   5  18   0   54.99   87.79
   0  19   0   43.80   53.59
   0  19   0   44.40   53.09
  -1 -19   0   -4.10   16.20
  -1  19   0   30.30   29.80
  -1  19   0  -77.19   53.69
   1  19   0  -35.40   24.90
   1  19   0   58.09   59.09
   1  19   0   58.79   58.59
  -1  19   0   30.30   30.60
  -1  19   0  -78.09   53.09
   1  19   0  -35.70   25.60
  -2 -19   0    3.40   26.20
   2  19   0    2.70   43.40
  -2  19   0   57.19   32.60
   2  19   0    2.20   43.70
  -2  19   0   27.50   60.09
  -2  19   0   56.99   31.80
   2  19   0   22.00   45.10
  -2  19   0   27.80   59.39
   2  19   0   22.70   46.40
  -3 -19   0    4.40   26.10
  -3 -19   0    4.20   30.60
  -3 -19   0    4.30   25.40
  -3  19   0   38.60   35.20
  -3  19   0  -65.99   48.70
   3  19   0  -65.99   46.40
   3  19   0    9.80   52.79
   3  19   0  -66.19   47.70
   3  19   0   15.80   52.39
  -3  19   0   38.40   34.30
  -3  19   0  -66.69   48.00
  -4 -19   0   -7.30   31.10
  -4 -19   0   20.90   31.50
  -4 -19   0   -7.30   30.30
  -4  19   0   10.70   28.90
  -4  19   0  -80.49   53.29
  -4  19   0  -80.89   52.59
   4  19   0   46.30   49.00
  -4  19   0   10.80   29.70
   4  19   0  -74.59   48.50
   4  19   0   46.10   50.39
   4  19   0  -79.29   48.80
   0  20   0   77.59   81.29
   0  20   0   76.59   82.19
   0  20   0  105.49   40.20
   0  20   0  106.19   41.30
 -13   0   1    7.60   37.90
 -13   0   1   14.60   19.30
  13   0  -1  -15.10   47.30
 -13   0   1   14.60   19.70
 -12   0   1   68.69   31.30
 -12   0   1   69.89   23.10
 -12   0   1   69.89   23.70
  12   0  -1   56.49   41.20
 -11   0   1   68.99   19.20
  11   0  -1   94.49   32.10
 -11   0   1   47.70   22.50
 -11   0   1   68.99   19.60
 -10   0   1    1.80    9.80
  10   0  -1  -13.60   14.80
 -10   0   1    9.50   13.70
  10   0  -1  -13.70   14.60
 -10   0   1    1.80   10.00
  10   0  -1    0.00   21.70
   9   0  -1   42.50   17.20
  -9   0   1   58.29   25.20
  -9   0   1   36.50   12.70
  -9   0   1   36.50   13.00
   9   0  -1   42.60   16.80
   9   0  -1   79.69   29.40
   8   0  -1  722.73   60.49
   8   0  -1  722.63   61.39
  -8   0   1  685.73   70.49
  -8   0   1  695.73   56.19
  -8   0   1  696.33   56.89
   8   0  -1  753.52   75.49
   7   0  -1    9.60    9.90
   7   0  -1   13.10   17.20
   7   0  -1    9.60   10.10
  -7   0   1   19.30   15.80
  -7   0   1   15.70    8.70
  -7   0   1   15.60    8.50
   6   0  -1   36.80   12.30
   6   0  -1   36.60   12.00
   6   0  -1   14.80   18.40
  -6   0   1   39.50   17.00
  -6   0   1   41.50   12.20
  -6   0   1   41.40   11.90
   5   0  -1  721.23   49.90
  -5   0   1  670.43   58.19
  -5   0   1  631.64   48.00
   5   0  -1  729.43   63.49
  -5   0   1  630.94   47.50
   5   0  -1  715.63   49.20
  -4   0   1  174.38   17.90
  -4   0   1  174.28   17.60
   4   0  -1  186.98   18.00
  -4   0   1  218.88   30.90
   4   0  -1  177.88   28.20
   4   0  -1  188.28   18.30
   3   0  -1  275.17   27.00
  -3   0   1  245.48   25.10
   3   0  -1  250.97   19.60
  -3   0   1  242.78   19.90
  -3   0   1  242.78   19.70
   3   0  -1  251.97   19.90
  -2   0   1  911.81   58.59
   2   0  -1  903.31   58.79
  -2   0   1  902.21   53.19
   2   0  -1  844.52   57.59
   2   0  -1  877.61   53.09
   2   0  -1  920.11   58.69
   2   0  -1  877.51   52.89
  -2   0   1  901.21   52.99
  -2   0   1  912.51   58.29
   0   0   1 1950.50  117.29
   0   0   1 1930.01  117.59
   1   0   1   62.69   12.60
   1   0   1   62.29   12.80
  -2   0  -1 2779.82  152.68
   2   0   1 2272.17  150.68
  -2   0  -1 2788.92  153.48
   2   0   1 2281.17  150.18
   3   0   1  468.95   43.00
   3   0   1  467.55   43.50
  -3   0  -1  635.34   45.90
  -3   0  -1  639.64   46.70
   4   0   1   29.70   12.40
   4   0   1   29.80   12.20
  -4   0  -1   34.00   12.10
  -4   0  -1   34.30   12.50
   5   0   1  523.65   51.79
   5   0   1  521.55   52.39
  -5   0  -1  687.93   53.29
  -5   0  -1  693.13   54.29
  -6   0  -1 1073.99   77.99
  -6   0  -1 1067.19   76.79
   6   0   1  889.01   77.19
   6   0   1  884.91   77.99
  -7   0  -1   36.50   14.30
  -7   0  -1   36.30   13.90
   7   0   1   13.10   15.70
   7   0   1   13.10   16.00
  -8   0  -1  207.58   34.60
   8   0   1  163.28   38.30
   8   0   1  164.28   37.70
  -8   0  -1  208.58   35.50
  -9   0  -1   90.89   24.50
   9   0   1   40.70   19.90
   9   0   1   40.40   20.20
  -9   0  -1   91.29   25.10
 -10   0  -1   -6.20   12.40
 -10   0  -1   -6.30   12.70
  10   0   1  -22.80   21.60
  11   0   1   18.30   33.50
 -11   0  -1   27.40   18.60
 -11   0  -1   13.70   26.40
 -11   0  -1   27.40   18.10
 -12   0  -1  -13.90   18.60
 -12   0  -1  -13.90   18.10
  12   0   1   30.60   35.00
 -12   0  -1   79.49   33.90
  13  -1  -1  -83.99   35.70
 -13  -1   1  -18.30   20.10
 -13  -1   1  -38.60   29.70
 -13  -1   1  -18.30   19.60
 -13   1   1    9.20   16.40
 -13   1   1    9.20   16.00
 -13   1   1   23.60   34.60
  13   1  -1  -74.49   46.70
 -12  -1   1  -10.30   15.30
 -12  -1   1  -29.10   23.00
 -12  -1   1  -10.30   15.60
  12  -1  -1  -67.09   30.30
  12   1  -1   -5.40   38.30
 -12   1   1   68.29   32.70
 -12   1   1    8.70   13.70
 -12   1   1    8.70   14.10
 -11  -1   1   10.10   12.70
  11  -1  -1    8.10   22.60
 -11  -1   1  -25.40   22.20
 -11  -1   1   10.10   13.00
 -11   1   1    5.30   11.40
  11   1  -1    1.30   18.90
 -11   1   1    5.30   11.70
 -11   1   1   63.89   28.30
  11   1  -1   18.20   30.40
  11   1  -1    1.30   18.60
  10  -1  -1   13.90   15.70
  10  -1  -1   29.60   25.10
  10  -1  -1   14.00   15.50
 -10  -1   1   48.70   15.10
 -10  -1   1   36.70   22.30
 -10  -1   1   48.60   14.80
  10   1  -1   31.50   20.30
 -10   1   1   46.30   23.50
  10   1  -1   31.60   29.80
 -10   1   1   31.30   11.10
  10   1  -1   31.40   20.70
 -10   1   1   31.30   11.30
  -9  -1   1  253.57   36.30
   9  -1  -1  291.87   49.20
  -9  -1   1  315.67   55.39
   9  -1  -1  187.58   36.10
  -9  -1   1  253.67   37.00
   9  -1  -1  188.78   35.60
   9   1  -1  284.37   43.20
   9   1  -1  266.77   51.69
  -9   1   1  277.27   30.10
  -9   1   1  277.17   29.60
   9   1  -1  283.97   42.30
  -9   1   1  250.77   48.60
  -8  -1   1  256.57   37.00
   8  -1  -1  257.77   38.70
  -8  -1   1  295.27   49.00
  -8  -1   1  256.47   36.20
   8  -1  -1  260.07   44.50
   8  -1  -1  259.07   38.10
   8   1  -1  220.58   49.20
  -8   1   1  309.17   48.70
   8   1  -1  254.37   37.50
  -8   1   1  239.58   27.60
   8   1  -1  255.37   38.40
  -8   1   1  239.78   28.10
  -7  -1   1  603.74   59.79
   7  -1  -1  375.36   41.50
  -7  -1   1  508.25   44.80
   7  -1  -1  376.66   41.10
   7  -1  -1  470.65   52.19
  -7  -1   1  507.85   44.10
   7   1  -1  573.34   61.49
   7   1  -1  579.64   47.80
   7   1  -1  583.54   48.80
  -7   1   1  472.75   39.40
  -7   1   1  531.85   55.49
  -7   1   1  473.35   39.90
   6  -1  -1  836.12   61.19
  -6  -1   1  830.52   62.39
  -6  -1   1  945.81   75.89
   6  -1  -1  836.92   60.59
  -6  -1   1  831.12   63.09
   6  -1  -1  867.61   71.79
  -6   1   1  793.42   70.29
   6   1  -1  830.62   79.19
  -6   1   1  851.41   58.19
   6   1  -1  856.71   64.29
  -6   1   1  850.11   57.69
   6   1  -1  849.81   63.29
  -5  -1   1   35.60   10.30
   5  -1  -1   40.50   10.40
   5  -1  -1   25.70   12.60
   5  -1  -1   40.60   10.60
  -5  -1   1   35.70   10.50
  -5  -1   1   36.90   13.70
   5   1  -1   45.00   12.10
  -5   1   1   29.40    7.70
   5   1  -1   44.60   11.70
  -5   1   1   29.40    7.90
   5   1  -1   37.00   17.90
  -4  -1   1 1608.54  105.59
  -4  -1   1 1483.25   96.19
  -4  -1   1 1483.85   96.79
   4  -1  -1 1590.44   92.19
   4  -1  -1 1583.64   91.69
   4   1  -1 1581.34   96.69
   4   1  -1 1589.24   97.39
  -4   1   1 1536.85   90.89
  -4   1   1 1539.15   91.19
   4   1  -1 1582.14  111.79
  -3  -1   1  102.69   17.90
   3  -1  -1  130.29    9.90
   3  -1  -1  131.39   10.10
  -3  -1   1  123.39   14.20
   3  -1  -1  128.79   14.40
  -3  -1   1  124.99   21.90
  -3  -1   1  123.39   14.00
  -3   1   1   95.19    9.00
  -3   1   1   75.19   15.90
   3   1  -1   86.39   21.30
   3   1  -1  101.69   14.70
  -3   1   1   95.19    9.20
   3   1  -1  101.89   15.10
  -2  -1   1 1215.68   72.49
  -2  -1   1 1244.48   81.29
  -2  -1   1 1103.99   74.79
  -2  -1   1 1214.78   72.09
   2   1  -1 1214.48   75.79
  -2   1   1 1226.98   72.99
   2   1  -1 1133.79   71.59
   2   1  -1 1133.79   71.89
   0  -1   1 1410.86   93.59
   0  -1   1 1428.16   93.29
   0   1   1 1479.95   86.09
   0   1  -1 1472.05   85.99
   0   1   1 1483.75   86.49
   1  -1   1  146.19   25.00
  -1  -1  -1  172.38   17.80
   1  -1   1  148.09   24.80
  -1  -1  -1  173.68   18.20
   1   1   1  214.08   19.20
   1   1   1  213.28   18.80
   2  -1   1  150.88   26.70
  -2  -1  -1  182.58   19.30
   2  -1   1  152.38   26.40
  -2  -1  -1  184.08   19.80
   2   1   1  126.59   19.70
  -2   1  -1  192.78   28.10
  -2   1  -1  191.88   28.60
   2   1   1  127.09   20.20
  -3  -1  -1 1060.79   70.89
   3  -1   1  902.21   74.19
   3  -1   1  895.01   74.69
  -3  -1  -1 1069.29   71.79
  -3   1  -1 1200.88   76.49
   3   1   1  924.81   70.59
   3   1   1  921.81   69.89
  -3   1  -1 1202.38   77.39
   4  -1   1  174.98   31.60
   4  -1   1  176.28   31.10
  -4  -1  -1  225.48   26.00
  -4  -1  -1  227.08   26.60
  -4   1  -1  203.38   29.70
  -4   1  -1  202.18   29.00
   4   1   1  201.88   29.90
   4   1   1  201.38   29.30
   5  -1   1  536.85   53.89
  -5  -1  -1  583.74   50.89
  -5  -1  -1  587.34   51.79
   5  -1   1  540.85   53.29
   5   1   1  545.55   52.29
   5   1   1  545.15   51.49
  -5   1  -1  688.23   52.79
  -5   1  -1  693.73   53.89
  -6  -1  -1  385.36   41.00
  -6  -1  -1  383.26   40.10
   6  -1   1  248.88   44.10
   6  -1   1  250.77   43.60
  -6   1  -1  400.06   39.60
  -6   1  -1  396.96   38.60
   6   1   1  327.07   45.40
   6   1   1  326.87   46.20
  -7  -1  -1   33.80   15.10
   7  -1   1   17.10   18.40
  -7  -1  -1   33.90   15.60
   7  -1   1   17.00   18.70
   7   1   1    9.90   13.90
  -7   1  -1   48.10   16.10
   7   1   1   10.00   13.60
  -7   1  -1   48.40   16.60
  -8  -1  -1  117.79   27.90
  -8  -1  -1  117.39   27.20
   8  -1   1  118.69   31.20
   8  -1   1  119.69   30.80
   8   1   1   94.59   30.40
   8   1   1   94.99   29.90
  -8   1  -1  143.69   28.50
  -8   1  -1  144.49   29.30
   9  -1   1  -42.40   18.20
  -9  -1  -1    6.90   13.80
  -9  -1  -1    6.90   13.50
   9  -1   1  -41.90   18.40
  -9   1  -1    2.40   13.00
   9   1   1   43.70   27.50
  -9   1  -1    2.40   12.70
 -10  -1  -1   78.09   27.60
  10  -1   1   38.70   25.40
 -10  -1  -1   77.99   27.00
  10   1   1   36.00   32.90
 -10   1  -1   94.19   26.60
  10   1   1  -15.30   17.10
 -10   1  -1   94.49   27.30
  10   1   1  -15.20   17.40
 -11  -1  -1   21.30   16.00
 -11  -1  -1   21.00   15.60
  11  -1   1   92.39   34.60
 -11  -1  -1   29.60   24.20
 -11   1  -1   30.10   19.10
 -11   1  -1   30.10   19.60
  11   1   1   42.20   40.30
  12  -1   1   63.29   44.90
 -12  -1  -1   46.00   23.50
 -12   1  -1   39.30   21.30
 -12   1  -1  106.69   39.40
  12   1   1   18.90   43.10
 -12   1  -1   39.40   21.80
 -13  -2   1  -89.19   28.70
 -13  -2   1    3.80   23.10
 -13  -2   1    3.80   23.70
  13  -2  -1   -6.30   36.70
 -13   2   1  -25.90   23.70
  13   2  -1  -25.90   48.80
 -13   2   1   60.59   19.80
 -13   2   1   60.39   19.30
 -12  -2   1   26.90   24.60
 -12  -2   1   42.30   21.10
  12  -2  -1   30.30   34.80
 -12  -2   1   42.20   20.60
 -12   2   1   98.29   21.70
  12   2  -1  -53.49   43.60
 -12   2   1   47.10   27.30
 -12   2   1   98.39   22.20
  11  -2  -1   37.80   29.00
 -11  -2   1   65.49   21.40
 -11  -2   1   65.49   20.90
 -11  -2   1  106.19   34.10
  11   2  -1    0.00   20.70
 -11   2   1   50.59   25.80
 -11   2   1   69.79   17.30
 -11   2   1   69.79   16.90
  11   2  -1   51.59   31.60
  11   2  -1    0.00   20.30
 -10  -2   1  225.48   35.20
 -10  -2   1  221.28   53.89
  10  -2  -1  133.69   30.20
  10  -2  -1  135.09   29.80
  10  -2  -1  183.88   40.90
 -10  -2   1  225.38   34.50
 -10   2   1  167.28   24.50
 -10   2   1  167.38   25.00
  10   2  -1  275.77   44.00
 -10   2   1  261.17   51.39
  10   2  -1  186.68   52.69
  10   2  -1  276.27   45.10
  -9  -2   1  149.79   36.90
   9  -2  -1   89.89   26.80
   9  -2  -1  206.28   40.10
  -9  -2   1  129.39   25.30
  -9  -2   1  129.39   24.80
   9  -2  -1   90.89   26.50
  -9   2   1  169.28   37.40
  -9   2   1  192.48   25.60
   9   2  -1  210.08   35.80
   9   2  -1  191.28   51.09
   9   2  -1  209.18   34.90
  -9   2   1  192.68   26.20
   8  -2  -1   53.39   18.30
  -8  -2   1   96.19   28.70
   8  -2  -1   52.89   18.50
  -8  -2   1   40.10   13.30
  -8  -2   1   40.00   13.60
   8  -2  -1   89.59   25.50
  -8   2   1   57.89   13.10
   8   2  -1   56.39   19.40
   8   2  -1   55.99   18.80
  -8   2   1   74.79   25.90
  -8   2   1   57.99   13.40
   8   2  -1   91.29   35.80
  -7  -2   1  469.85   53.29
   7  -2  -1  373.96   39.90
  -7  -2   1  401.36   40.70
   7  -2  -1  370.66   40.30
  -7  -2   1  401.56   41.40
   7  -2  -1  363.56   42.70
  -7   2   1  414.46   33.50
   7   2  -1  529.15   76.39
   7   2  -1  398.16   42.50
  -7   2   1  413.76   33.00
   7   2  -1  394.96   41.60
   6  -2  -1  225.08   29.80
   6  -2  -1  223.28   30.20
  -6  -2   1  214.18   37.90
  -6  -2   1  152.58   26.20
   6  -2  -1  217.78   31.40
  -6  -2   1  152.68   26.80
   6   2  -1  182.18   42.50
  -6   2   1  200.38   19.00
  -6   2   1  200.88   19.30
   6   2  -1  219.38   31.90
   6   2  -1  221.08   32.80
  -5  -2   1    6.80    6.20
  -5  -2   1    6.80    6.30
   5  -2  -1   10.40    7.50
   5  -2  -1   10.50    7.40
  -5  -2   1   13.50    9.60
  -5   2   1    6.60    3.70
   5   2  -1   12.70    9.20
  -5   2   1    6.60    3.80
   5   2  -1   12.70    9.50
   5   2  -1    5.70   18.10
  -4  -2   1  526.75   42.90
   4  -2  -1  522.65   39.00
  -4  -2   1  571.84   49.10
  -4  -2   1  526.85   43.40
   4  -2  -1  528.85   38.90
   4   2  -1  515.35   42.60
  -4   2   1  564.24   33.70
  -4   2   1  562.24   33.50
   4   2  -1  517.35   43.30
  -3  -2   1  230.38   25.00
  -3  -2   1  193.38   20.70
  -3  -2   1  193.38   21.10
  -3  -2   1  239.18   37.90
   3   2  -1  192.98   27.30
   3   2  -1  218.08   22.00
   3   2  -1  218.38   22.40
  -2  -2   1 3594.84  210.98
  -2  -2   1 3730.63  222.68
  -2  -2   1 3635.44  208.68
   2  -2  -1 3624.24  199.18
   2  -2  -1 3618.84  199.08
  -2  -2   1 3637.64  209.18
   2   2  -1 3647.93  211.18
  -2   2   1 3597.34  199.08
  -2   2   1 3625.74  199.18
  -2   2   1 3795.92  201.78
  -2   2   1 3812.32  205.48
   2   2  -1 3560.64  208.88
   2   2  -1 3560.54  208.38
   1  -2  -1  836.52   45.80
   1  -2  -1  838.72   48.80
   1  -2  -1  834.72   48.50
  -1  -2   1  774.72   61.39
  -1  -2   1  761.22   61.49
   1   2  -1  755.22   51.59
  -1   2   1  775.42   48.50
  -1   2   1  813.92   46.00
   1   2  -1  756.02   51.99
   1   2  -1  833.02   62.79
  -1   2   1  769.62   48.20
   1   2  -1  780.62   53.09
   1   2  -1  820.82   63.09
   0  -2   1  524.85   46.90
   0  -2   1  519.35   47.20
   0   2   1  568.24   37.30
   0   2  -1  489.25   36.60
   0   2   1  572.74   37.80
   1  -2   1 2655.33  164.98
   1  -2   1 2623.54  165.38
  -1  -2  -1 2762.12  156.48
  -1  -2  -1 2743.93  155.78
  -1   2  -1 2431.06  164.68
   1   2   1 2804.02  156.28
  -1   2  -1 2540.15  153.28
  -1   2  -1 2463.35  164.28
   1   2   1 2826.72  156.98
  -2  -2  -1  886.01   62.79
   2  -2   1  852.71   71.09
   2  -2   1  864.01   70.69
  -2  -2  -1  880.41   62.09
  -2   2  -1  813.32   69.29
   2   2   1 1011.20   64.99
  -2   2  -1  804.62   69.69
   2   2   1 1003.20   64.09
  -3  -2  -1  239.18   25.80
  -3  -2  -1  240.58   26.40
   3  -2   1  204.18   35.70
   3  -2   1  206.78   35.40
  -3   2  -1  270.17   39.30
   3   2   1  198.78   28.60
   3   2   1  197.28   27.90
  -3   2  -1  268.77   39.90
  -4  -2  -1 1383.46   95.39
   4  -2   1 1291.87  103.99
   4  -2   1 1276.77  104.59
  -4  -2  -1 1375.76   94.39
   4   2   1 1440.86   97.29
   4   2   1 1432.56   96.19
   5  -2   1  342.87   54.19
  -5  -2  -1  411.96   42.70
   5  -2   1  339.17   54.79
  -5  -2  -1  409.86   41.80
  -5   2  -1  539.75   47.10
   5   2   1  441.56   44.60
   5   2   1  439.76   43.80
  -5   2  -1  536.95   46.10
  -6  -2  -1  149.79   28.20
  -6  -2  -1  150.48   29.00
   6  -2   1  126.89   33.80
   6  -2   1  128.29   33.40
  -6   2  -1  199.08   31.40
   6   2   1  142.09   29.90
   6   2   1  141.69   29.20
  -6   2  -1  200.68   32.30
  -7  -2  -1 1126.29   85.89
  -7  -2  -1 1121.99   84.59
   7   2   1  880.81   83.69
   7   2   1  880.01   82.59
  -7   2  -1 1085.59   80.99
  -7   2  -1 1077.39   79.79
   8  -2   1   98.99   30.50
  -8  -2  -1  149.09   32.10
   8  -2   1   97.89   30.80
  -8  -2  -1  149.59   32.90
  -8   2  -1  204.58   34.00
  -8   2  -1  203.38   33.10
   8   2   1  142.89   33.40
   8   2   1  142.99   32.70
   9  -2   1   57.69   25.80
   9  -2   1   58.39   25.50
  -9  -2  -1  120.19   32.00
  -9  -2  -1  119.89   31.20
  -9   2  -1  110.39   26.90
   9   2   1   85.09   32.70
  -9   2  -1  109.79   26.10
 -10  -2  -1   85.99   37.00
 -10   2  -1   78.99   24.20
 -10   2  -1   78.69   23.60
  10   2   1   34.90   35.20
  11  -2   1   77.99   33.00
 -11  -2  -1   40.40   37.00
 -11  -2  -1   16.70   19.20
 -11  -2  -1   16.80   19.70
 -11   2  -1   14.00   18.10
  11   2   1  -15.30   35.40
 -11   2  -1   14.10   18.60
 -12  -2  -1  -20.30   16.40
 -12  -2  -1   30.00   32.80
 -12  -2  -1  -20.30   16.80
  12  -2   1   59.69   37.80
 -12   2  -1    3.60   19.20
 -12   2  -1   17.10   36.20
 -12   2  -1    3.60   19.70
  12   2   1   46.80   42.20
  13  -3  -1    5.10   28.60
 -13  -3   1  -16.20   22.10
 -13  -3   1  -16.20   22.70
 -13  -3   1 -100.89   33.70
  13  -3  -1    1.10   28.70
 -13   3   1   64.19   38.40
 -13   3   1   15.70   13.80
  13   3  -1    9.90   49.00
 -13   3   1   15.60   13.50
 -12  -3   1   -6.30   17.40
  12  -3  -1   -7.30   26.40
 -12  -3   1   -6.20   17.00
 -12  -3   1   16.40   30.00
 -12   3   1  -19.00   10.60
 -12   3   1  -19.00   10.40
 -12   3   1   37.30   30.80
  12   3  -1    7.20   46.50
  11  -3  -1    5.80   22.40
  11  -3  -1   22.00   20.80
 -11  -3   1   44.00   18.50
  11  -3  -1   22.30   20.60
 -11  -3   1   41.10   23.20
 -11  -3   1   44.10   18.00
 -11   3   1   28.20   10.80
 -11   3   1   28.20   10.60
 -11   3   1   53.89   30.30
  11   3  -1   27.00   35.70
 -10  -3   1   13.10   12.50
  10  -3  -1   26.80   18.60
  10  -3  -1   26.50   19.40
 -10  -3   1   26.80   23.20
 -10  -3   1   13.20   12.20
  10  -3  -1   27.40   18.40
  10   3  -1  -40.60   21.90
 -10   3   1   -1.60   15.00
 -10   3   1   14.80    8.60
 -10   3   1   14.80    8.80
  -9  -3   1   56.99   20.20
  -9  -3   1   56.99   20.70
   9  -3  -1   57.49   19.60
  -9  -3   1   39.20   23.30
   9  -3  -1   83.69   22.70
   9  -3  -1   84.79   22.40
   9   3  -1   89.79   38.90
  -9   3   1   65.39   14.00
   9   3  -1   76.79   25.00
  -9   3   1   99.09   30.60
   9   3  -1   76.29   24.20
  -9   3   1   65.39   13.70
  -8  -3   1  188.68   32.30
  -8  -3   1  188.78   33.00
   8  -3  -1  171.28   29.90
  -8  -3   1  221.08   44.10
   8  -3  -1  139.79   29.30
   8  -3  -1  141.49   29.00
   8   3  -1  206.48   52.49
  -8   3   1  164.58   19.30
  -8   3   1  164.38   19.00
   8   3  -1  231.08   37.60
   8   3  -1  232.98   38.80
  -7  -3   1  212.68   34.70
  -7  -3   1  180.88   38.30
   7  -3  -1  238.08   34.50
   7  -3  -1  241.18   34.20
   7  -3  -1  207.38   29.10
  -7  -3   1  212.58   34.00
   7   3  -1  170.48   30.90
  -7   3   1  183.78   19.00
  -7   3   1  183.38   18.70
   7   3  -1  169.08   30.10
  -6  -3   1  612.54   62.39
  -6  -3   1  594.94   54.89
  -6  -3   1  594.84   54.19
  -6   3   1  660.43   42.30
   6   3  -1  642.94   56.19
   6   3  -1  638.84   55.19
  -6   3   1  657.93   42.00
  -5  -3   1  304.37   34.30
   5  -3  -1  402.96   32.30
   5  -3  -1  398.06   32.60
  -5  -3   1  304.27   33.80
  -5  -3   1  295.07   43.70
  -5   3   1  366.16   24.70
  -5   3   1  364.06   24.40
   5   3  -1  356.16   36.60
   5   3  -1  354.46   35.90
  -4  -3   1 1458.25  108.39
  -4  -3   1 1521.75  105.19
   4  -3  -1 1613.14   93.89
   4  -3  -1 1593.84   93.99
  -4  -3   1 1521.65  104.39
  -4  -3   1 1645.34  124.99
   4   3  -1 1526.35  123.79
   4   3  -1 1709.23  107.19
  -4   3   1 1650.33   90.39
  -4   3   1 1638.24   90.19
   4   3  -1 1704.43  106.29
  -3  -3   1  715.83   54.99
  -3  -3   1  715.73   54.39
  -3  -3   1  824.02   72.49
  -3  -3   1  710.53   56.79
   3  -3  -1  775.72   46.60
  -3   3   1  725.43   47.30
  -3   3   1  735.13   47.20
   3   3  -1  741.23   55.49
  -3   3   1  725.13   42.90
  -3   3   1  725.03   42.70
   3   3  -1  744.83   69.29
   3   3  -1  758.02   57.19
   3   3  -1  740.23   54.89
   2  -3  -1 1571.74   85.69
   2  -3  -1 1572.84   85.99
  -2  -3   1 1394.96   94.69
   2  -3  -1 1487.45   91.79
  -2  -3   1 1383.86   93.29
  -2  -3   1 1384.76   93.89
  -2   3   1 1467.35   85.29
   2   3  -1 1536.65   94.69
   2   3  -1 1468.05   95.09
   2   3  -1 1531.25  109.59
  -2   3   1 1470.85   85.49
   2   3  -1 1536.75   95.39
  -2   3   1 1441.46   91.69
  -1  -3   1 2215.68  134.89
  -1  -3   1 2321.17  135.19
  -1  -3   1 2323.87  135.79
  -1  -3   1 2199.38  149.19
  -1  -3   1 2252.67  149.19
   1   3  -1 2140.59  134.59
  -1   3   1 2244.78  130.19
   1   3  -1 2431.46  135.89
   1   3  -1 2138.99  134.09
  -1   3   1 2254.37  130.59
   1   3  -1 2381.96  151.58
  -1   3   1 2142.69  138.79
   1   3  -1 2420.46  151.28
   0  -3   1 1876.71  126.79
   0  -3  -1 1827.12  112.39
   0  -3   1 1902.81  126.29
   0  -3  -1 1820.82  111.89
   0  -3   1 1881.81  111.89
   0   3  -1 1782.72  111.49
   0   3   1 1955.40  113.19
   0   3  -1 1884.31  125.69
   0   3  -1 1863.41  126.19
   0   3   1 1944.61  112.59
   1  -3   1 4059.19  247.28
   1  -3   1 4016.90  247.88
  -1  -3  -1 4243.78  236.28
  -1  -3  -1 4225.68  235.48
   1   3   1 3943.41  234.68
  -1   3  -1 4111.89  232.48
  -1   3  -1 4054.39  249.18
  -1   3  -1 4101.99  248.58
   1   3   1 3969.40  235.48
   2  -3   1  151.98   29.50
  -2  -3  -1  212.88   23.50
   2  -3   1  153.78   29.20
  -2  -3  -1  211.88   22.90
  -2   3  -1  173.18   31.80
  -2   3  -1  170.98   32.10
   2   3   1  151.28   23.60
   2   3   1  152.48   24.20
   3  -3   1  277.57   43.90
   3  -3   1  281.17   43.50
  -3  -3  -1  358.16   34.90
  -3  -3  -1  356.46   34.10
  -3   3  -1  266.67   43.40
   3   3   1  339.67   33.90
   3   3   1  342.37   34.70
  -3   3  -1  269.17   42.90
  -4  -3  -1  400.76   41.10
   4  -3   1  421.66   59.99
  -4  -3  -1  402.56   41.90
   4  -3   1  414.86   60.59
   4   3   1  396.36   40.70
   4   3   1  399.56   41.60
  -4   3  -1  522.25   51.49
  -4   3  -1  524.75   50.79
   5  -3   1  206.08   46.10
  -5  -3  -1  229.68   36.10
  -5  -3  -1  228.68   35.30
   5  -3   1  203.48   46.50
  -5   3  -1  215.98   35.20
   5   3   1  247.88   37.30
  -5   3  -1  215.68   34.40
   5   3   1  249.38   38.30
   6  -3   1   -0.90   14.50
   6  -3   1   -0.90   14.70
  -6  -3  -1   13.10    9.10
  -6  -3  -1   13.10    9.40
   6   3   1   -5.80   10.30
  -6   3  -1   10.00   11.30
  -6   3  -1   10.10   11.60
   6   3   1   -5.80   10.60
  -7  -3  -1   43.70   18.70
   7  -3   1   11.40   20.40
   7  -3   1   11.50   20.20
  -7  -3  -1   43.80   19.20
  -7   3  -1   73.39   19.40
   7   3   1   46.80   22.10
   7   3   1   41.40   20.30
  -7   3  -1   74.09   20.00
   7   3   1   41.20   19.80
   8  -3   1   67.89   30.40
  -8  -3  -1   82.79   24.20
   8  -3   1   68.69   30.10
  -8  -3  -1   82.99   24.80
   8   3   1  122.19   31.40
   8   3   1  122.39   32.20
   8   3   1   40.50   23.00
  -8   3  -1   95.49   23.10
  -8   3  -1   94.79   22.40
   9  -3   1    9.40   24.10
  -9  -3  -1   84.89   32.00
  -9  -3  -1   53.19   20.70
   9  -3   1    9.20   24.30
  -9  -3  -1   53.29   21.30
  -9   3  -1   52.99   17.60
  -9   3  -1   53.29   18.10
 -10  -3  -1   72.09   31.70
 -10  -3  -1  102.59   30.40
 -10  -3  -1  102.69   31.20
 -10   3  -1  119.79   26.20
  10   3   1   35.50   33.50
 -10   3  -1  120.29   26.90
 -11  -3  -1   21.30   22.30
  11  -3   1   27.80   27.00
 -11  -3  -1   35.90   33.10
 -11  -3  -1   21.40   22.80
  11   3   1   54.79   41.20
 -11   3  -1   89.29   23.50
 -11   3  -1   89.49   24.10
  12  -3   1   77.19   39.00
 -12  -3  -1   76.89   33.80
 -12  -3  -1   89.49   47.30
 -12  -3  -1   76.79   33.00
 -12   3  -1   48.20   22.40
 -12   3  -1   39.20   32.60
 -12   3  -1   48.10   21.90
  12   3   1   38.20   41.20
 -12  -4   1    0.30   21.60
 -12  -4   1    0.30   22.10
 -12  -4   1    2.20   35.20
  12  -4  -1   28.80   18.80
 -12   4   1   18.00    8.70
 -12   4   1   84.69   35.60
  12   4  -1   -0.30   40.90
 -12   4   1   18.00    8.90
 -11  -4   1   18.80   17.30
 -11  -4   1   18.90   17.70
  11  -4  -1    9.70   16.70
 -11  -4   1  -38.60   24.10
  11  -4  -1   -1.10   16.10
  11  -4  -1    9.60   16.90
  11   4  -1  -50.09   32.60
 -11   4   1   20.90    9.20
 -11   4   1  -22.00   19.70
 -11   4   1   20.90    9.40
 -10  -4   1  165.88   39.90
 -10  -4   1  110.59   28.20
  10  -4  -1  136.99   27.30
  10  -4  -1  132.29   27.20
  10  -4  -1  130.79   27.50
 -10  -4   1  110.69   28.80
 -10   4   1  156.38   37.90
  10   4  -1  168.18   46.40
 -10   4   1  169.08   18.60
 -10   4   1  169.08   18.20
  -9  -4   1   79.19   22.90
  -9  -4   1   51.89   19.20
   9  -4  -1   62.19   19.00
   9  -4  -1   72.39   18.50
   9  -4  -1   61.49   19.20
  -9  -4   1   51.89   19.60
  -9   4   1   74.99   13.10
  -9   4   1   75.09   13.40
   9   4  -1   47.70   25.30
  -9   4   1   41.30   16.70
   9   4  -1   47.30   24.50
   9   4  -1   32.20   31.50
   8  -4  -1  145.69   29.20
  -8  -4   1  255.97   47.40
  -8  -4   1  197.88   35.40
   8  -4  -1  204.98   28.00
  -8  -4   1  197.88   36.20
   8  -4  -1  147.39   28.90
   8   4  -1  191.88   37.40
  -8   4   1  204.98   19.20
  -8   4   1  204.58   18.90
   8   4  -1  190.18   36.30
  -7  -4   1   -1.50    5.00
   7  -4  -1    9.60    9.00
   7  -4  -1    9.50    9.10
  -7  -4   1   -1.50    4.90
  -7  -4   1   -9.90   10.50
   7   4  -1   11.80   12.20
  -7   4   1   12.60    5.60
  -7   4   1   12.50    5.40
   7   4  -1   26.50   24.10
   7   4  -1   11.70   11.80
  -6  -4   1   48.20   16.30
  -6  -4   1   51.59   19.90
   6  -4  -1   74.09   15.50
  -6  -4   1   48.10   15.90
   6  -4  -1   74.89   15.30
  -6   4   1   49.60    8.50
   6   4  -1   19.50   22.80
   6   4  -1   57.09   18.10
   6   4  -1   56.79   17.60
  -6   4   1   49.30    8.30
  -5  -4   1  709.63   57.69
  -5  -4   1  709.63   58.59
   5  -4  -1  636.74   45.50
  -5  -4   1  583.14   58.39
   5  -4  -1  645.74   45.30
   5   4  -1  678.13   57.29
   5   4  -1  555.44   81.49
   5   4  -1  675.53   56.39
  -5   4   1  638.64   40.40
  -5   4   1  642.44   40.70
  -4  -4   1   98.09   20.10
   4  -4  -1  114.59   16.40
  -4  -4   1  123.69   33.60
  -4  -4   1  113.89   23.50
  -4  -4   1   98.09   19.70
   4   4  -1  168.58   27.50
  -4   4   1  146.29   12.00
  -4   4   1  122.99   17.20
   4   4  -1  168.18   26.90
  -4   4   1  121.69   17.40
   4   4  -1  161.08   39.00
  -4   4   1  146.19   11.80
  -3  -4   1  243.58   34.50
   3  -4  -1  217.88   23.50
  -3  -4   1  210.18   41.60
  -3  -4   1  232.58   27.70
  -3  -4   1  232.48   27.20
  -3   4   1  239.38   18.60
   3   4  -1  224.88   31.20
  -3   4   1  252.97   26.10
   3   4  -1  225.18   31.80
   3   4  -1  245.18   28.50
   3   4  -1  187.08   39.60
  -3   4   1  239.38   18.40
  -3   4   1  255.57   25.90
  -2  -4   1   23.00    9.40
   2  -4  -1   19.70    6.20
   2  -4  -1   15.60    9.60
  -2  -4   1   27.80   16.30
   2  -4  -1   19.70    6.40
  -2  -4   1   23.10    9.70
  -2  -4   1   18.60   10.10
   2   4  -1   27.70   10.30
   2   4  -1   31.00   13.20
  -2   4   1   26.70    6.90
   2   4  -1   29.60   11.30
  -2   4   1   20.50    8.90
   2   4  -1   27.70   10.10
  -2   4   1   26.60    6.80
  -1  -4   1 1684.33  129.09
  -1  -4   1 1752.12  114.39
  -1  -4   1 1805.72  113.09
  -1  -4   1 1750.12  113.69
   1  -4  -1 1884.71  123.29
   1   4  -1 1887.81  133.09
   1   4  -1 1922.41  132.69
   1   4  -1 1861.21  113.29
  -1   4   1 1781.92  109.49
   1   4  -1 1950.30  115.79
  -1   4   1 1781.42  121.29
   1   4  -1 1949.20  115.09
  -1   4   1 1786.82  109.99
   0  -4   1 2499.15  167.38
   0  -4  -1 2475.15  149.59
   0  -4  -1 2486.55  141.49
   0  -4   1 2355.26  147.79
   0  -4   1 2544.55  167.08
   0  -4  -1 2479.45  150.28
   0   4   1 2769.82  169.28
   0   4  -1 2564.24  148.99
   0   4   1 2634.34  150.38
   0   4  -1 2389.66  166.58
   0   4  -1 2502.65  150.68
   0   4  -1 2419.76  165.98
   0   4  -1 2499.85  149.99
   0   4   1 2645.64  151.18
   1  -4   1   74.09   14.50
  -1  -4  -1   88.89   16.90
  -1  -4  -1   89.19   17.30
   1  -4   1  118.69   26.60
   1  -4   1  117.29   26.90
   1   4   1  103.79   18.10
  -1   4  -1   87.19   23.40
  -1   4  -1   86.29   23.60
   1   4   1  145.49   34.30
  -1   4  -1   96.79   15.90
   1   4   1  103.19   17.70
  -2  -4  -1 1028.80   71.89
   2  -4   1 1052.99   82.79
  -2  -4  -1 1032.10   72.79
   2  -4   1 1042.00   83.39
  -2   4  -1  939.31   83.49
  -2   4  -1  932.21   66.89
   2   4   1  947.61   71.49
   2   4   1  941.61   70.59
   2   4   1  989.20   90.69
  -2   4  -1  951.30   82.99
   3  -4   1 1032.60   82.99
  -3  -4  -1  918.51   71.09
   3  -4   1 1021.00   83.59
  -3  -4  -1  921.61   71.99
   3   4   1 1024.20   74.19
   3   4   1 1017.00   73.09
   3   4   1 1050.19   95.09
  -3   4  -1  776.42   78.59
  -3   4  -1  786.32   78.19
   4  -4   1  703.73   68.99
  -4  -4  -1  641.44   57.49
   4  -4   1  712.23   68.39
  -4  -4  -1  643.54   58.49
  -4   4  -1  704.43   68.49
  -4   4  -1  710.33   67.79
   4   4   1  669.73   76.89
   4   4   1  671.73   58.49
   4   4   1  677.13   59.59
  -5  -4  -1  264.77   40.80
   5  -4   1  261.17   53.99
  -5  -4  -1  263.87   39.90
   5  -4   1  264.47   53.49
   5   4   1  303.07   43.90
  -5   4  -1  367.76   52.99
  -5   4  -1  369.16   51.99
   5   4   1  300.67   42.80
   5   4   1  309.97   57.99
   6  -4   1  395.86   65.99
  -6  -4  -1  435.46   47.60
   6  -4   1  390.86   66.59
  -6  -4  -1  436.66   48.60
  -6   4  -1  503.65   50.79
   6   4   1  425.06   50.19
   6   4   1  422.26   49.10
  -6   4  -1  502.45   49.80
   6   4   1  377.26   73.69
  -7  -4  -1   96.79   26.80
   7  -4   1  148.79   41.60
   7  -4   1  146.89   42.00
  -7  -4  -1   96.49   26.10
   7   4   1  135.79   34.90
   7   4   1  135.09   33.90
  -7   4  -1  197.98   32.20
   7   4   1   94.29   34.50
  -7   4  -1  196.58   31.30
  -8  -4  -1   81.29   26.50
   8  -4   1   86.39   28.20
   8  -4   1   87.49   27.90
  -8  -4  -1   69.59   26.90
  -8  -4  -1   81.09   25.90
  -8   4  -1  160.48   28.60
  -8   4  -1  161.78   29.40
   8   4   1  122.69   31.30
   8   4   1  122.19   30.50
   8   4   1   60.39   30.70
   9  -4   1   -3.70   23.60
  -9  -4  -1   78.69   32.50
  -9  -4  -1   23.10   17.10
  -9  -4  -1   23.20   17.50
   9  -4   1   -3.70   23.80
   9   4   1  -30.00   24.10
  -9   4  -1   -3.00   13.80
  -9   4  -1   -3.00   14.20
 -10  -4  -1   23.90   22.60
 -10  -4  -1   -6.10   17.60
 -10  -4  -1   23.80   22.00
 -10   4  -1   34.10   15.00
 -10   4  -1   34.30   15.40
 -11  -4  -1   16.00   20.30
  11  -4   1   36.00   29.00
 -11  -4  -1   40.30   26.50
 -11  -4  -1   16.00   19.90
 -11   4  -1   24.80   18.30
  11   4   1   62.29   46.70
 -11   4  -1   24.80   18.80
 -12  -4  -1    3.90   23.50
 -12  -4  -1    3.80   23.00
  12  -4   1   63.79   39.00
 -12  -4  -1   62.79   32.10
 -12   4  -1   25.40   21.10
  12   4   1   31.90   44.80
 -12   4  -1   25.40   20.60
 -12  -5   1  -16.00   24.90
  12   5  -1  -53.29   37.70
 -12   5   1    6.10   20.30
 -11  -5   1   26.70   17.40
 -11  -5   1  -19.30   24.10
 -11  -5   1   26.70   17.00
  11   5  -1  -31.30   34.90
 -11   5   1  -30.20   11.80
  10  -5  -1   67.79   13.50
  10  -5  -1   68.69   13.40
  10  -5  -1   69.39   14.20
 -10  -5   1  116.49   29.80
 -10  -5   1  116.49   29.10
 -10  -5   1  138.89   40.50
 -10   5   1   98.29   11.30
 -10   5   1  106.79   32.10
 -10   5   1   98.29   11.50
   9  -5  -1   65.19   15.60
   9  -5  -1   82.69   17.00
  -9  -5   1  126.79   26.90
   9  -5  -1   83.59   16.80
  -9  -5   1  126.79   27.50
  -9  -5   1   94.99   33.20
   9   5  -1  114.89   31.20
   9   5  -1  115.79   32.10
  -9   5   1  102.29   11.60
   9   5  -1  259.57   62.19
  -9   5   1  102.39   11.80
   8  -5  -1  199.28   25.20
   8  -5  -1  187.98   21.50
  -8  -5   1  196.58   36.80
  -8  -5   1  219.28   46.60
   8  -5  -1  196.98   25.50
  -8  -5   1  196.58   36.00
  -8   5   1  218.68   17.60
  -8   5   1  219.18   17.90
   8   5  -1  134.79   46.10
   8   5  -1  162.98   33.90
   8   5  -1  164.18   34.90
  -7  -5   1  211.88   37.10
  -7  -5   1  211.88   37.90
  -7  -5   1  279.97   49.50
   7  -5  -1  173.98   23.80
   7  -5  -1  176.48   23.60
  -7   5   1  224.08   17.60
   7   5  -1  162.78   45.20
   7   5  -1  190.18   35.70
  -7   5   1  222.98   17.30
   7   5  -1  191.38   36.70
   6  -5  -1  183.88   21.50
  -6  -5   1  169.18   33.10
   6  -5  -1  183.98   21.60
  -6  -5   1  169.08   32.40
  -6  -5   1  202.68   39.60
  -6   5   1  217.88   17.20
   6   5  -1  180.68   33.70
   6   5  -1  179.68   32.90
  -6   5   1  219.48   17.50
   6   5  -1  195.28   51.39
  -5  -5   1 1664.43  118.89
  -5  -5   1 1677.13  123.09
  -5  -5   1 1664.53  119.99
   5   5  -1 1829.12  150.78
   5   5  -1 1739.33  119.99
  -5   5   1 1743.23   99.79
  -5   5   1 1744.43  100.09
   5   5  -1 1745.93  121.39
  -4  -5   1  680.63   61.79
  -4  -5   1  705.53   80.89
   4  -5  -1  736.53   54.89
  -4  -5   1  748.43   61.99
  -4  -5   1  748.33   61.19
   4   5  -1  729.23   60.79
   4   5  -1  720.03   61.79
   4   5  -1  730.93   61.69
  -4   5   1  764.72   47.20
   4   5  -1  796.72   83.59
  -4   5   1  622.04   55.79
  -4   5   1  630.14   55.49
  -4   5   1  764.72   46.90
  -3  -5   1  469.55   44.20
  -3  -5   1  469.35   44.80
   3  -5  -1  448.66   43.60
  -3  -5   1  488.45   45.30
  -3  -5   1  509.25   74.39
  -3   5   1  508.05   35.80
  -3   5   1  481.85   44.90
  -3   5   1  487.55   44.60
   3   5  -1  438.76   66.69
   3   5  -1  515.95   45.60
  -3   5   1  507.85   35.40
   3   5  -1  446.06   43.30
   3   5  -1  516.55   46.40
  -2  -5   1 1112.79   98.39
   2  -5  -1 1064.19   71.69
  -2  -5   1 1130.79   80.59
   2  -5  -1 1094.29   83.99
   2  -5  -1 1063.39   71.19
  -2  -5   1 1129.99   79.79
  -2  -5   1 1125.99   78.59
   2   5  -1 1159.78  100.09
   2   5  -1 1074.89   77.29
  -2   5   1 1145.09   72.29
   2   5  -1 1114.19   79.59
   2   5  -1 1114.49   80.39
  -2   5   1 1143.49   71.79
  -2   5   1 1165.98   85.29
  -1  -5   1 1012.70   73.29
  -1  -5   1  943.11   89.09
  -1  -5   1  949.51   70.09
  -1  -5   1 1010.70   72.49
   1  -5  -1  988.90   82.19
  -1   5   1 1097.39   70.29
  -1   5   1  988.20   57.59
   1   5  -1 1023.50   73.39
   1   5  -1 1036.50   91.19
  -1   5   1 1094.69   69.59
  -1   5   1 1036.00   82.39
   1   5  -1 1069.89   71.09
   1   5  -1 1055.29   90.89
   1   5  -1 1023.10   72.69
   0  -5   1  447.56   49.20
   0  -5  -1  425.06   26.90
   0  -5   1  437.86   49.20
   0  -5  -1  368.16   33.30
   0  -5   1  376.36   32.00
   0  -5  -1  368.56   33.90
   0   5   1  345.37   49.90
   0   5  -1  307.77   32.20
   0   5  -1  331.97   31.10
   0   5  -1  393.66   54.69
   0   5   1  336.67   32.90
   0   5  -1  388.46   55.19
   0   5   1  335.47   32.40
   0   5  -1  307.47   31.80
  -1  -5  -1  535.55   38.40
   1  -5   1  611.34   58.89
  -1  -5  -1  457.35   42.10
   1  -5   1  556.74   40.50
   1  -5   1  601.94   59.19
  -1  -5  -1  458.05   42.70
  -1   5  -1  456.85   54.59
   1   5   1  497.35   68.99
  -1   5  -1  461.65   54.09
   1   5   1  501.65   44.10
   1   5   1  499.25   43.40
  -1   5  -1  453.65   39.00
  -2  -5  -1   78.59   16.60
  -2  -5  -1   68.79   18.60
  -2  -5  -1   68.69   18.10
   2  -5   1   80.39   25.80
   2  -5   1   79.49   26.00
  -2   5  -1   84.29   26.70
  -2   5  -1   75.79   16.20
   2   5   1   57.49   15.30
  -2   5  -1   83.39   27.00
   2   5   1  120.19   35.80
   2   5   1   57.19   14.90
   3  -5   1  410.76   58.59
  -3  -5  -1  442.06   41.90
  -3  -5  -1  416.66   42.90
  -3  -5  -1  415.66   42.10
   3  -5   1  406.56   59.19
   3   5   1  342.67   62.39
   3   5   1  411.66   41.40
  -3   5  -1  425.96   59.99
  -3   5  -1  420.36   60.49
   3   5   1  414.46   42.30
   4  -5   1  296.07   51.79
  -4  -5  -1  266.67   39.10
   4  -5   1  299.27   51.19
  -4  -5  -1  220.98   35.60
  -4  -5  -1  267.37   40.00
  -4   5  -1  218.78   42.60
   4   5   1  211.48   52.29
   4   5   1  255.37   38.50
   4   5   1  257.37   39.60
  -4   5  -1  216.18   43.00
   5  -5   1   17.00   19.20
   5  -5   1   16.90   19.40
  -5  -5  -1    9.30   10.40
  -5  -5  -1    7.00   10.60
  -5  -5  -1    9.20   10.20
   5   5   1   -6.70   15.30
   5   5   1   25.00   12.70
   5   5   1   25.20   13.10
  -5   5  -1   40.00   21.40
  -5   5  -1   40.30   21.10
  -6  -5  -1  165.78   36.20
   6  -5   1  171.78   40.70
  -6  -5  -1  157.68   36.10
  -6  -5  -1  165.38   35.30
   6  -5   1  173.78   40.30
  -6   5  -1  252.07   42.10
   6   5   1  183.78   36.70
   6   5   1  182.28   35.70
  -6   5  -1  251.67   43.00
   6   5   1  190.98   47.10
  -7  -5  -1  116.89   30.10
  -7  -5  -1  196.38   39.70
  -7  -5  -1  116.69   29.40
   7  -5   1  109.69   34.60
   7  -5   1  108.39   35.00
   7   5   1  105.89   41.60
   7   5   1  101.09   28.70
  -7   5  -1  173.38   32.10
  -7   5  -1  174.18   33.00
   7   5   1  101.69   29.50
   8  -5   1   59.89   30.30
  -8  -5  -1   28.70   24.40
  -8  -5  -1  100.39   27.80
   8  -5   1   59.19   30.70
  -8  -5  -1  100.19   27.20
   8   5   1  102.89   29.60
   8   5   1   75.99   40.20
   8   5   1  103.49   30.40
  -8   5  -1  124.59   25.40
  -8   5  -1  125.59   26.20
   9  -5   1   38.30   23.40
  -9  -5  -1   62.09   22.40
  -9  -5  -1   -4.20   22.00
   9  -5   1   37.90   23.70
  -9  -5  -1   61.99   21.90
  -9   5  -1   41.60   17.60
   9   5   1   40.90   24.00
   9   5   1   41.00   24.70
   9   5   1   49.00   30.70
  -9   5  -1   41.30   17.10
 -10  -5  -1   15.70   20.30
 -10  -5  -1   15.80   20.80
 -10  -5  -1   -0.40   17.50
  10   5   1   -7.00   31.80
 -10   5  -1   50.49   16.10
 -10   5  -1   50.79   16.50
 -11  -5  -1   14.90   21.40
 -11  -5  -1   58.79   31.40
 -11  -5  -1   14.90   20.90
 -11   5  -1   30.80   19.60
 -11   5  -1   30.70   19.10
  11   5   1   27.30   42.40
  12  -5   1   18.00   36.50
 -12  -6   1   39.70   29.30
 -12  -6   1   21.30   22.70
 -12  -6   1   21.30   22.20
 -12   6   1   94.29   33.60
  12   6  -1   10.20   56.89
 -11  -6   1   28.70   24.00
 -11  -6   1  -15.00   23.90
 -11  -6   1   28.80   23.40
 -11   6   1   58.59   29.80
 -10  -6   1   16.40   16.70
 -10  -6   1   16.40   17.10
 -10  -6   1  -30.60   15.80
  10   6  -1   26.10   32.10
 -10   6   1   53.79   19.20
  -9  -6   1   19.80   19.40
  -9  -6   1   43.00   20.50
  -9  -6   1   43.00   20.00
   9   6  -1   20.00   22.10
   9   6  -1   19.80   21.40
   9   6  -1  112.69   49.80
  -8  -6   1   63.19   21.10
  -8  -6   1   58.29   23.70
   8  -6  -1   50.09    9.80
  -8  -6   1   63.09   20.70
  -8   6   1   67.59    7.90
  -8   6   1   69.79    7.70
   8   6  -1   52.49   24.90
   8   6  -1   49.00   29.40
  -8   6   1   69.89    7.90
   8   6  -1   52.99   25.70
  -8   6   1   67.39    7.70
  -7  -6   1   35.50   17.40
   7  -6  -1   26.70    9.80
  -7  -6   1   21.60   13.30
  -7  -6   1   21.60   13.70
  -7   6   1   39.00    7.40
  -7   6   1   25.20    6.00
   7   6  -1   23.10   22.40
   7   6  -1   33.80   14.30
  -7   6   1   25.20    6.10
  -7   6   1   38.80    7.20
   7   6  -1   34.10   14.70
  -6  -6   1   -9.50    6.90
  -6  -6   1    4.50   12.60
   6  -6  -1    3.80    8.60
  -6  -6   1   -9.50    6.70
  -6   6   1   -1.70    3.40
  -6   6   1   -1.70    3.50
   6   6  -1   -4.80    7.40
   6   6  -1   -4.80    7.60
   6   6  -1    1.90   19.50
  -6   6   1    5.00    6.40
  -6   6   1    4.90    6.50
  -5  -6   1    4.00    9.40
  -5  -6   1    4.00    9.20
  -5  -6   1   11.60   10.50
   5  -6  -1   29.70   11.70
  -5   6   1   13.30    5.10
  -5   6   1   25.50   12.10
   5   6  -1   15.00   12.50
   5   6  -1   18.60   22.60
  -5   6   1   25.80   12.00
  -5   6   1   13.30    5.20
   5   6  -1   15.10   12.80
  -4  -6   1   46.60   17.60
  -4  -6   1   12.50   19.80
   4  -6  -1   85.69   20.20
  -4  -6   1   46.50   17.20
  -4  -6   1   55.49   17.10
   4   6  -1   63.29   18.50
  -4   6   1   62.29   11.40
  -4   6   1   62.29   11.70
   4   6  -1   67.49   33.70
  -4   6   1   30.70   16.10
   4   6  -1   63.49   19.00
   4   6  -1   61.99   19.90
  -4   6   1   30.30   16.30
  -3  -6   1  644.64   89.49
   3  -6  -1  599.04   57.79
  -3  -6   1  670.73   56.99
  -3  -6   1  618.94   55.09
  -3  -6   1  671.03   57.79
   3   6  -1  652.03   56.89
   3   6  -1  658.03   54.79
  -3   6   1  612.54   46.10
  -3   6   1  624.34   58.19
  -3   6   1  616.44   58.59
  -3   6   1  612.04   45.60
   3   6  -1  702.13   76.99
   3   6  -1  652.73   57.79
  -2  -6   1  764.52   62.29
   2  -6  -1  737.13   55.19
   2  -6  -1  922.71   73.69
   2  -6  -1  737.73   55.79
  -2  -6   1  765.12   63.19
  -2  -6   1  730.63   60.19
  -2  -6   1  651.73   76.39
  -2   6   1  889.31   73.09
   2   6  -1  791.72   60.59
  -2   6   1  856.61   56.99
  -2   6   1  750.52   48.30
   2   6  -1  716.03   79.09
   2   6  -1  745.63   62.29
  -2   6   1  869.51   73.09
  -2   6   1  857.81   57.59
   2   6  -1  745.83   63.09
   2   6  -1  735.13   79.09
  -1  -6   1  577.54   66.19
   1  -6  -1  476.15   56.19
  -1  -6   1  559.34   47.30
  -1  -6   1  557.64   49.50
  -1  -6   1  558.34   50.19
   1   6  -1  698.63   53.19
  -1   6   1  620.94   48.20
   1   6  -1  698.63   53.99
   1   6  -1  526.95   64.29
  -1   6   1  619.64   47.50
  -1   6   1  553.84   59.09
   1   6  -1  613.64   48.00
  -1   6   1  576.14   35.60
   1   6  -1  536.15   64.09
   0  -6   1  169.88   23.80
   0  -6   1  142.69   35.10
   0  -6  -1  179.88   27.80
   0  -6  -1  191.38   39.40
   0  -6  -1  179.78   27.20
   0  -6  -1  160.08   16.10
   0   6   1  159.38   25.90
   0   6   1  149.79   35.80
   0   6  -1  164.38   40.20
   0   6  -1  168.88   26.60
   0   6  -1  168.78   26.00
   0   6   1  158.78   25.30
   0   6  -1  162.18   40.60
   0   6  -1  169.68   24.10
   1  -6   1 1361.96  112.89
   1  -6   1 1339.87  113.09
   1  -6   1 1389.96   89.89
  -1  -6  -1 1439.26   96.89
  -1  -6  -1 1440.76   97.89
  -1  -6  -1 1440.06   88.49
   1   6   1 1277.27   95.79
   1   6   1 1271.77   94.79
  -1   6  -1 1374.96  112.59
  -1   6  -1 1533.15   95.59
  -1   6  -1 1289.67   89.99
  -1   6  -1 1531.45   94.79
  -1   6  -1 1359.86  113.29
   1   6   1 1334.67  117.39
   2  -6   1 1316.67  106.59
   2  -6   1 1336.67  106.09
  -2  -6  -1 1238.88   89.39
  -2  -6  -1 1301.17   84.39
  -2  -6  -1 1240.68   90.49
  -2   6  -1 1107.29  101.59
  -2   6  -1 1119.49  100.89
   2   6   1 1165.88   88.19
  -2   6  -1 1175.88   83.29
   2   6   1 1171.88   89.29
   2   6   1 1227.98  113.79
  -3  -6  -1 1277.07   95.99
   3  -6   1 1305.47  106.89
   3  -6   1 1289.27  107.59
  -3  -6  -1 1354.96   92.39
  -3  -6  -1 1275.17   94.89
  -3   6  -1 1083.49  105.99
  -3   6  -1 1097.29  105.29
   3   6   1 1252.27   95.79
  -3   6  -1 1391.56   91.09
   3   6   1 1244.68   94.49
   3   6   1 1392.96  125.29
  -4  -6  -1  837.12   73.49
   4  -6   1 1017.80   89.79
  -4  -6  -1  838.92   70.79
  -4  -6  -1  835.72   72.39
   4  -6   1 1029.00   88.99
   4   6   1  839.22   72.89
   4   6   1  795.32   95.09
  -4   6  -1  747.33   81.89
   4   6   1  845.32   74.19
  -4   6  -1  757.02   81.29
   5  -6   1 1054.99   97.99
  -5  -6  -1  870.11   81.69
   5  -6   1 1066.09   97.19
  -5  -6  -1  868.71   80.59
  -5  -6  -1  938.41   82.69
  -5   6  -1 1074.79   96.69
   5   6   1 1087.29   88.09
   5   6   1 1002.80  109.89
   5   6   1 1078.69   86.49
  -5   6  -1 1084.99   95.89
   6  -6   1  401.76   66.79
   6  -6   1  397.66   67.59
  -6  -6  -1  418.66   60.39
  -6  -6  -1  346.27   53.39
  -6  -6  -1  345.67   52.39
   6   6   1  366.46   56.09
  -6   6  -1  504.95   57.39
   6   6   1  369.56   57.59
  -6   6  -1  507.55   56.59
   6   6   1  475.95   88.79
  -7  -6  -1  182.28   40.60
   7  -6   1   89.59   34.80
  -7  -6  -1  172.98   37.10
  -7  -6  -1  173.28   38.00
   7  -6   1   88.69   35.20
  -7   6  -1  206.88   37.00
   7   6   1  171.08   37.50
  -7   6  -1  207.18   37.80
   7   6   1  169.68   36.40
   7   6   1   85.29   39.00
  -8  -6  -1   73.39   28.50
  -8  -6  -1   73.29   27.80
  -8  -6  -1   32.30   16.80
   8  -6   1   27.10   28.10
   8  -6   1   26.80   28.40
   8   6   1   56.79   24.50
   8   6   1   50.49   43.80
  -8   6  -1   65.39   19.60
  -8   6  -1   65.79   20.20
   8   6   1   56.49   23.80
   9  -6   1   21.60   28.90
  -9  -6  -1   13.50   20.00
  -9  -6  -1    6.00   23.50
  -9  -6  -1   13.60   19.50
   9  -6   1   21.40   29.30
   9   6   1   82.39   34.20
  -9   6  -1   26.20   13.30
   9   6   1   82.09   33.20
   9   6   1  -14.80   32.30
  -9   6  -1   26.00   12.90
  10  -6   1  -51.89   24.80
 -10  -6  -1   27.40   25.80
 -10  -6  -1   33.70   24.50
 -10  -6  -1   27.40   25.20
  10  -6   1  -51.39   25.10
 -10   6  -1   32.70   15.20
  10   6   1   48.40   41.70
 -10   6  -1   32.50   14.70
 -11  -6  -1   14.40   21.90
 -11  -6  -1   14.40   22.40
 -11  -6  -1   16.50   30.50
  11   6   1   16.00   42.50
 -11   6  -1   27.40   17.70
 -11   6  -1   27.30   17.20
 -12  -7   1   -8.80   20.00
 -12  -7   1    5.80   30.50
 -12  -7   1   -8.80   20.50
  12   7  -1   57.59   55.69
 -12   7   1   60.39   33.00
 -11  -7   1   13.80   20.90
 -11  -7   1    2.30   28.70
 -11  -7   1   13.80   21.50
  11   7  -1   36.90   42.30
 -11   7   1  -20.90   21.40
 -10  -7   1   69.29   27.50
 -10  -7   1   63.59   29.60
 -10  -7   1   69.19   26.90
  10   7  -1   72.99   30.40
  10   7  -1   73.49   31.40
  10   7  -1   49.30   41.50
 -10   7   1   44.70   29.40
  -9  -7   1   73.49   31.10
  -9  -7   1   55.29   18.80
  -9  -7   1   55.29   19.20
   9   7  -1   92.09   29.10
   9   7  -1   91.39   28.20
   9   7  -1   19.40   30.10
  -8  -7   1  143.19   34.10
  -8  -7   1  106.09   35.60
  -8  -7   1  143.19   33.30
  -8   7   1  121.19   10.00
  -8   7   1  127.69   10.40
  -8   7   1  128.39   10.60
   8   7  -1  149.88   34.40
  -8   7   1  121.19   10.10
   8   7  -1  148.79   33.50
   8   7  -1  118.09   51.29
   7  -7  -1  410.36   34.20
  -7  -7   1  368.56   54.89
  -7  -7   1  368.46   53.79
  -7  -7   1  318.77   54.59
   7   7  -1  413.06   58.99
  -7   7   1  436.26   31.70
  -7   7   1  434.56   31.30
   7   7  -1  410.56   57.49
   7   7  -1  471.05   96.49
  -7   7   1  397.26   29.00
  -7   7   1  397.26   28.70
  -6  -7   1  468.35   51.29
  -6  -7   1  443.86   61.99
   6  -7  -1  418.46   40.20
  -6  -7   1  468.45   52.19
   6   7  -1  452.65   52.09
  -6   7   1  390.76   39.70
  -6   7   1  393.46   31.00
   6   7  -1  370.36   80.19
  -6   7   1  387.46   40.10
  -6   7   1  393.46   30.70
   6   7  -1  454.85   53.29
   5  -7  -1  243.88   36.60
  -5  -7   1  189.08   50.79
  -5  -7   1  237.08   42.90
  -5  -7   1  247.48   42.20
  -5  -7   1  247.38   41.30
  -5   7   1  249.88   23.20
   5   7  -1  312.07   48.10
  -5   7   1  264.27   41.70
  -5   7   1  249.88   23.50
   5   7  -1  219.98   56.69
  -5   7   1  267.77   41.30
   5   7  -1  310.97   46.90
   4  -7  -1  454.25   49.80
  -4  -7   1  456.15   48.70
  -4  -7   1  456.35   49.60
  -4  -7   1  562.24   89.89
  -4  -7   1  484.65   50.39
  -4   7   1  446.86   37.10
   4   7  -1  453.45   48.20
  -4   7   1  490.85   51.49
   4   7  -1  519.05   52.29
  -4   7   1  447.16   37.50
   4   7  -1  520.05   53.29
  -4   7   1  485.65   51.99
   4   7  -1  453.15   80.49
  -3  -7   1  417.96   43.90
  -3  -7   1  491.25   49.60
  -3  -7   1  449.06   76.79
  -3  -7   1  490.85   48.80
   3  -7  -1  552.84   54.79
   3   7  -1  593.84   83.39
  -3   7   1  553.44   37.60
  -3   7   1  409.96   37.60
  -3   7   1  410.36   38.10
  -3   7   1  358.16   54.19
   3   7  -1  514.45   50.09
   3   7  -1  436.06   44.80
  -3   7   1  362.96   53.79
   3   7  -1  515.15   50.99
  -2  -7   1  201.78   31.20
   2  -7  -1  255.47   27.50
  -2  -7   1  229.48   35.10
  -2  -7   1  229.68   35.90
   2  -7  -1  234.18   43.20
  -2  -7   1  307.77   59.19
   2  -7  -1  255.67   28.00
  -2   7   1  189.48   40.90
   2   7  -1  251.07   52.49
   2   7  -1  225.18   36.20
   2   7  -1  247.18   28.60
  -2   7   1  193.18   40.80
  -2   7   1  192.78   28.00
   2   7  -1  246.18   52.49
  -2   7   1  199.68   17.80
   2   7  -1  225.08   35.50
  -2   7   1  192.48   27.50
  -1  -7   1  844.62   59.59
  -1  -7   1  757.62   61.39
  -1  -7   1  693.73   78.19
   1  -7  -1  671.73   73.19
  -1  -7   1  758.42   62.29
   1  -7  -1  714.53   44.20
  -1   7   1  743.03   58.49
   1   7  -1  655.13   59.69
   1   7  -1  739.83   56.89
   1   7  -1  659.03   77.39
  -1   7   1  727.43   44.30
  -1   7   1  704.53   73.49
   1   7  -1  648.34   77.69
  -1   7   1  741.33   57.69
   1   7  -1  655.13   58.89
   0  -7  -1  872.31   90.19
   0  -7  -1  967.70   71.79
   0  -7  -1  867.11   59.89
   0  -7  -1  967.80   72.59
   0  -7   1  879.91   89.79
   0  -7   1  905.91   66.69
   0   7   1 1016.70   93.29
   0   7  -1  857.21   90.69
   0   7  -1  961.40   68.19
   0   7  -1 1020.10   73.29
   0   7  -1  869.61   90.19
   0   7  -1 1020.60   74.19
   0   7   1  961.90   72.89
   0   7   1  959.00   71.89
   1  -7   1  172.58   24.90
  -1  -7  -1  194.58   30.80
  -1  -7  -1  181.98   24.50
   1  -7   1  172.28   39.50
   1  -7   1  167.58   39.50
  -1  -7  -1  194.48   30.10
  -1   7  -1  148.39   25.60
  -1   7  -1  183.28   42.20
   1   7   1  176.98   44.30
   1   7   1  210.98   31.80
  -1   7  -1  181.18   42.70
   1   7   1  211.88   32.60
  -1   7  -1  211.38   28.80
  -1   7  -1  148.29   25.10
  -2  -7  -1  812.12   67.59
  -2  -7  -1  817.02   60.69
   2  -7   1  822.82   82.89
  -2  -7  -1  812.92   68.59
   2  -7   1  835.52   82.59
   2   7   1  669.83   99.59
   2   7   1  748.73   65.49
  -2   7  -1  816.42   62.09
  -2   7  -1  716.63   78.79
  -2   7  -1  715.63   59.49
  -2   7  -1  815.52   61.29
   2   7   1  752.32   66.49
  -2   7  -1  709.03   79.49
  -3  -7  -1  318.47   46.10
  -3  -7  -1  361.26   38.10
   3  -7   1  323.97   57.09
  -3  -7  -1  318.07   45.10
   3  -7   1  318.47   57.49
  -3   7  -1  219.98   49.60
  -3   7  -1  314.97   34.60
   3   7   1  389.16   75.19
  -3   7  -1  217.38   50.09
   3   7   1  323.67   45.90
   3   7   1  325.57   47.10
  -4  -7  -1   -4.10    8.10
   4  -7   1    1.50   14.40
  -4  -7  -1   -4.10    8.30
  -4  -7  -1    9.00   10.00
   4  -7   1    1.60   14.30
  -4   7  -1   -0.90    7.90
   4   7   1   11.60   22.40
  -4   7  -1   11.60   17.70
   4   7   1    0.30    8.90
  -4   7  -1   11.40   17.90
   4   7   1    0.30    9.10
  -5  -7  -1   64.29   19.90
  -5  -7  -1   77.89   22.90
  -5  -7  -1   78.09   23.50
   5  -7   1   30.90   23.10
   5  -7   1   31.20   22.80
   5   7   1   69.39   23.20
  -5   7  -1   80.69   26.30
  -5   7  -1   79.79   26.60
   5   7   1   69.99   24.00
   5   7   1   29.30   30.60
  -6  -7  -1   52.29   23.10
  -6  -7  -1   52.19   22.60
  -6  -7  -1  142.59   34.50
   6  -7   1  114.99   38.70
   6  -7   1  116.29   38.20
  -6   7  -1  133.39   35.30
  -6   7  -1  132.29   35.90
   6   7   1   59.09   27.90
   6   7   1   73.39   21.90
   6   7   1   73.99   22.60
   7  -7   1  116.19   39.40
  -7  -7  -1  125.79   34.50
  -7  -7  -1  101.09   28.20
  -7  -7  -1  100.99   27.50
   7  -7   1  117.49   38.90
   7   7   1  131.39   36.40
   7   7   1   63.59   33.40
  -7   7  -1  155.38   34.70
   7   7   1  132.49   37.50
  -7   7  -1  154.98   35.40
   8  -7   1   88.49   33.60
   8  -7   1   87.59   34.00
  -8  -7  -1  131.09   36.70
  -8  -7  -1   83.49   26.00
  -8  -7  -1  130.99   35.80
   8   7   1   17.00   35.70
   8   7   1   99.09   32.80
  -8   7  -1   93.79   26.30
  -8   7  -1   93.39   25.60
   8   7   1   99.79   33.80
   9  -7   1   36.90   30.00
   9  -7   1   36.50   30.40
  -9  -7  -1   31.60   22.00
  -9  -7  -1   31.70   22.50
  -9  -7  -1   70.19   28.00
  -9   7  -1   90.49   22.70
   9   7   1  102.79   33.30
  -9   7  -1   91.29   23.40
   9   7   1  -31.60   40.80
   9   7   1  102.19   32.30
  10  -7   1   12.60   27.90
 -10  -7  -1   76.39   36.00
 -10  -7  -1   92.49   35.20
 -10  -7  -1   92.49   34.40
  10  -7   1   12.70   27.60
 -10   7  -1   44.00   19.00
 -10   7  -1   43.70   18.50
  10   7   1  -53.69   36.80
 -11  -7  -1   42.50   27.10
 -11  -7  -1   43.50   31.50
 -11  -7  -1   42.50   27.70
  11   7   1  -81.49   48.20
 -11   7  -1   29.90   19.30
 -11   7  -1   29.80   18.80
 -12  -8   1  -34.70   25.70
 -12  -8   1   26.50   35.80
 -12  -8   1  -34.80   26.30
  12   8  -1  -59.69   54.99
 -12   8   1   53.99   37.10
 -11  -8   1   58.49   32.30
 -11  -8   1   58.49   33.00
 -11  -8   1   46.90   33.80
  11   8  -1   46.50   40.20
 -11   8   1   30.00   29.80
 -10  -8   1   37.50   24.70
 -10  -8   1   76.39   34.70
 -10  -8   1   37.60   25.30
  10   8  -1   21.10   43.70
 -10   8   1   53.29   22.40
  -9  -8   1   17.40   18.50
  -9  -8   1   17.40   19.00
  -9  -8   1   18.10   21.50
   9   8  -1   52.09   26.20
   9   8  -1   51.59   25.50
   9   8  -1   62.99   44.90
  -8  -8   1    8.80   16.00
  -8  -8   1    8.80   15.60
  -8  -8   1   47.10   23.20
  -8   8   1   20.80    5.00
  -8   8   1   32.40    6.30
  -8   8   1   32.60    6.50
   8   8  -1   80.29   39.70
  -8   8   1   20.90    5.10
   8   8  -1   -8.70   14.70
   8   8  -1   -8.70   14.30
  -7  -8   1   11.70   13.10
  -7  -8   1    6.60   14.70
   7  -8  -1   14.60   12.30
  -7  -8   1    6.60   14.40
   7   8  -1   57.89   37.80
   7   8  -1   11.30   20.30
  -7   8   1   15.20    9.90
  -7   8   1   15.20   10.10
   7   8  -1   11.30   20.90
  -7   8   1    6.90    6.10
  -7   8   1    6.90    6.20
   6  -8  -1   20.90   14.60
  -6  -8   1   20.70   12.70
  -6  -8   1   20.70   13.00
  -6  -8   1   40.80   21.60
   6   8  -1   37.10   21.10
  -6   8   1   33.80    9.60
  -6   8   1   20.20   14.20
   6   8  -1   71.79   43.30
  -6   8   1   33.80    9.40
  -6   8   1   20.00   14.40
   6   8  -1   37.30   21.60
  -5  -8   1   14.10   12.60
  -5  -8   1   14.10   12.90
   5  -8  -1    3.50   18.30
  -5  -8   1   23.60   16.70
  -5  -8   1   30.10   23.80
   5   8  -1   23.60   14.60
  -5   8   1   27.70    8.70
   5   8  -1   23.70   15.00
  -5   8   1   27.60    8.50
  -5   8   1   11.30   19.00
  -5   8   1   11.50   18.80
   5   8  -1   36.10   26.30
   4  -8  -1   78.59   22.30
  -4  -8   1   83.49   22.50
  -4  -8   1   90.39   38.10
  -4  -8   1   49.60   18.70
  -4  -8   1   83.39   22.00
   4   8  -1   75.69   22.20
   4   8  -1   86.79   36.90
  -4   8   1   64.29   15.20
  -4   8   1   86.29   17.40
   4   8  -1   58.49   24.30
  -4   8   1   86.39   17.80
  -4   8   1   56.39   23.90
   4   8  -1   58.39   24.90
  -4   8   1   56.99   23.60
  -3  -8   1  383.66   46.10
   3  -8  -1  446.86   64.19
  -3  -8   1  405.06   44.50
  -3  -8   1  383.96   46.90
  -3  -8   1  454.95   82.89
  -3   8   1  501.55   36.20
   3   8  -1  305.57   66.99
  -3   8   1  521.15   42.80
  -3   8   1  411.16   62.39
   3   8  -1  469.75   50.99
  -3   8   1  520.55   42.10
   3   8  -1  469.25   50.09
   3   8  -1  470.75   47.00
  -3   8   1  416.86   61.89
  -2  -8   1  339.17   38.10
  -2  -8   1  400.86   43.60
   2  -8  -1  311.27   55.89
  -2  -8   1  400.56   42.80
  -2  -8   1  325.57   65.89
   2   8  -1  296.77   63.69
   2   8  -1  340.97   37.60
   2   8  -1  302.47   63.59
  -2   8   1  388.76   37.70
   2   8  -1  342.27   49.60
  -2   8   1  388.16   37.00
  -2   8   1  404.86   27.90
  -2   8   1  336.47   55.29
  -2   8   1  329.97   55.39
   2   8  -1  342.07   48.60
  -1  -8   1  490.55   44.50
   1  -8  -1  448.46   44.50
  -1  -8   1  499.05   79.89
   1  -8  -1  448.76   45.20
   1  -8  -1  479.35   33.00
   1  -8  -1  596.84   82.99
  -1  -8   1  531.35   51.19
  -1  -8   1  530.75   50.29
  -1   8   1  536.35   33.70
  -1   8   1  447.96   45.00
  -1   8   1  477.95   71.29
   1   8  -1  583.44   85.89
   1   8  -1  531.95   50.09
  -1   8   1  448.96   45.70
   1   8  -1  532.05   50.89
   1   8  -1  466.95   43.90
   1   8  -1  573.14   86.29
   0  -8  -1  656.63   76.49
   0  -8  -1  694.43   57.79
   0  -8  -1  617.24   45.60
   0  -8   1  752.92   82.19
   0  -8   1  576.94   50.39
   0  -8  -1  694.43   58.69
   0   8   1  837.52   84.99
   0   8  -1  594.44   87.29
   0   8   1  679.33   59.69
   0   8   1  677.43   58.69
   0   8  -1  585.94   87.89
   0   8  -1  643.54   52.79
   0   8  -1  614.34   56.89
   0   8  -1  614.24   56.09
  -1  -8  -1  215.88   36.20
  -1  -8  -1  215.78   35.50
  -1  -8  -1  201.98   24.10
   1  -8   1  181.38   48.50
   1  -8   1  283.67   28.30
  -1   8  -1  264.87   36.90
  -1   8  -1  237.68   50.99
   1   8   1  204.28   52.19
   1   8   1  241.18   37.20
  -1   8  -1  234.98   51.59
  -1   8  -1  264.67   36.10
   1   8   1  242.08   38.00
  -1   8  -1  207.68   30.00
  -2  -8  -1  261.47   34.90
   2  -8   1  224.18   49.30
   2  -8   1  219.58   49.40
  -2  -8  -1  255.87   41.20
  -2  -8  -1  255.87   40.40
  -2   8  -1  275.07   30.80
  -2   8  -1  246.08   35.70
  -2   8  -1  234.08   49.00
   2   8   1  278.07   43.10
   2   8   1  279.67   61.99
  -2   8  -1  236.48   48.50
  -2   8  -1  245.88   34.90
   2   8   1  276.67   42.00
  -3  -8  -1  503.15   56.69
   3  -8   1  705.33   76.59
   3  -8   1  711.53   76.29
  -3  -8  -1  562.44   52.99
  -3  -8  -1  503.45   57.59
   3   8   1  692.63  106.69
   3   8   1  597.44   59.29
  -3   8  -1  519.75   78.79
  -3   8  -1  608.94   53.39
  -3   8  -1  513.95   79.49
  -3   8  -1  597.74   51.99
   3   8   1  600.94   60.49
  -3   8  -1  597.04   51.19
   4  -8   1  617.84   75.89
  -4  -8  -1  598.64   62.39
   4  -8   1  670.13   90.79
  -4  -8  -1  599.14   63.39
  -4  -8  -1  675.03   62.69
  -4   8  -1  551.14   87.39
  -4   8  -1  558.24   86.69
   4   8   1  730.23   67.99
   4   8   1  734.83   69.39
  -4   8  -1  754.92   62.99
   4   8   1  612.54  102.99
   5  -8   1  479.85   71.99
  -5  -8  -1  410.86   57.69
  -5  -8  -1  426.76   60.09
   5  -8   1  473.15   72.59
  -5  -8  -1  427.26   61.39
   5   8   1  351.36   55.69
   5   8   1  287.07   74.89
  -5   8  -1  318.87   61.89
   5   8   1  354.06   57.19
  -5   8  -1  439.66   47.70
  -5   8  -1  314.87   62.49
   6  -8   1  472.45   75.49
  -6  -8  -1  413.26   62.29
   6  -8   1  466.15   76.09
  -6  -8  -1  484.85   57.59
  -6  -8  -1  484.45   56.49
   6   8   1  413.46   65.89
  -6   8  -1  440.26   71.59
  -6   8  -1  436.16   72.49
   6   8   1  410.06   64.09
   6   8   1  513.95   93.99
   7  -8   1  110.79   39.10
  -7  -8  -1  137.59   38.00
   7  -8   1  112.19   38.70
  -7  -8  -1  137.59   37.10
  -7  -8  -1   73.19   25.40
  -7   8  -1  253.37   45.90
   7   8   1   36.10   37.60
  -7   8  -1  254.67   45.10
   7   8   1  119.69   36.60
   7   8   1  120.69   37.80
  -8  -8  -1  133.09   41.40
  -8  -8  -1  116.69   31.70
   8  -8   1  182.28   44.20
  -8  -8  -1  116.69   32.40
   8  -8   1  184.58   43.80
  -8   8  -1  170.48   34.20
   8   8   1  213.48   43.50
   8   8   1   90.69   43.40
  -8   8  -1  170.08   33.40
   8   8   1  215.18   44.80
  -9  -8  -1   89.09   36.00
  -9  -8  -1   88.49   27.40
  -9  -8  -1   88.49   28.10
  -9   8  -1  102.99   24.70
  -9   8  -1  102.29   24.00
   9   8   1  147.09   39.00
   9   8   1  147.89   40.10
 -10  -8  -1   39.80   28.60
 -10  -8  -1   14.00   29.10
 -10  -8  -1   39.80   28.00
 -10   8  -1   30.50   15.80
  10   8   1  -60.69   40.10
 -10   8  -1   30.70   16.20
 -11  -8  -1  -17.30   22.10
 -11  -8  -1  -17.30   21.60
 -11  -8  -1   16.50   32.20
 -11   8  -1   16.90   14.50
 -11   8  -1   17.00   14.90
  11   8   1  -56.09   51.39
 -11  -9   1  -12.50   22.50
 -11  -9   1  -12.50   23.00
 -11  -9   1   81.19   39.50
 -11   9   1    0.50   24.00
  11   9  -1   33.10   63.09
 -10  -9   1    2.20   22.10
 -10  -9   1    2.10   22.60
 -10  -9   1    1.50   19.90
 -10   9   1   32.90   24.40
  10   9  -1   42.60   42.60
  -9  -9   1   67.59   28.00
  -9  -9   1   32.70   26.30
  -9  -9   1   67.69   28.60
   9   9  -1   29.30   28.50
   9   9  -1   29.10   27.70
   9   9  -1   79.19   53.49
  -8  -9   1   99.79   28.60
  -8  -9   1   99.79   29.20
  -8  -9   1  123.89   33.40
  -8   9   1  127.69   15.00
   8   9  -1  181.68   46.40
  -8   9   1  126.99   14.70
  -8   9   1  114.19   12.80
   8   9  -1  180.48   45.10
   8   9  -1  102.09   45.00
  -8   9   1  113.99   12.60
  -7  -9   1  178.38   42.00
  -7  -9   1  178.18   41.00
   7  -9  -1  118.89   24.80
  -7  -9   1  143.89   37.50
  -7   9   1  138.99   26.40
   7   9  -1   95.59   33.00
  -7   9   1  147.59   17.60
   7   9  -1   95.29   32.10
   7   9  -1  111.49   50.99
  -7   9   1  139.99   26.10
  -7   9   1  147.49   17.30
  -6  -9   1  115.89   32.90
   6  -9  -1  132.59   30.00
  -6  -9   1  115.79   32.10
  -6  -9   1   99.69   31.90
  -6   9   1  120.59   30.60
   6   9  -1  170.18   67.09
  -6   9   1  110.99   18.20
  -6   9   1  119.09   30.90
   6   9  -1  153.28   35.60
   6   9  -1  152.58   34.70
  -6   9   1  110.89   17.80
  -5  -9   1  226.28   42.70
   5  -9  -1  231.18   42.40
  -5  -9   1  223.48   42.90
  -5  -9   1  324.77   75.59
  -5  -9   1  223.28   42.00
  -5   9   1  260.67   48.40
  -5   9   1  243.28   27.60
  -5   9   1  257.67   48.90
  -5   9   1  247.48   35.60
   5   9  -1  233.88   62.49
   5   9  -1  246.28   46.40
   5   9  -1  245.38   45.30
  -5   9   1  243.08   27.10
  -4  -9   1  365.66   53.09
  -4  -9   1  524.95   92.19
   4  -9  -1  437.56   60.09
  -4  -9   1  423.96   58.49
  -4  -9   1  424.66   59.69
   4   9  -1  400.86   78.69
  -4   9   1  298.77   54.79
  -4   9   1  295.67   55.29
   4   9  -1  431.06   59.79
   4   9  -1  403.86   46.50
  -4   9   1  426.26   39.40
   4   9  -1  432.16   61.19
  -4   9   1  345.07   34.90
  -4   9   1  425.36   38.70
  -3  -9   1  398.66   42.90
   3  -9  -1  398.96   63.59
  -3  -9   1  391.26   74.49
  -3  -9   1  340.87   50.99
  -3  -9   1  340.47   49.90
  -3   9   1  307.17   35.80
  -3   9   1  332.87   29.00
  -3   9   1  306.77   35.20
   3   9  -1  370.96   53.39
   3   9  -1  337.57   72.29
  -3   9   1  369.06   59.99
   3   9  -1  401.86   42.40
   3   9  -1  330.27   72.29
  -3   9   1  374.26   59.49
   3   9  -1  371.66   54.49
  -2  -9   1  435.16   49.80
  -2  -9   1  434.76   48.90
   2  -9  -1  382.86   62.99
  -2  -9   1  462.65   44.90
  -2  -9   1  411.46   80.59
  -2   9   1  448.06   42.40
  -2   9   1  354.16   64.09
   2   9  -1  402.26   41.50
   2   9  -1  411.26   77.09
  -2   9   1  350.76   64.29
  -2   9   1  448.86   43.20
   2   9  -1  443.46   48.50
   2   9  -1  401.16   77.29
  -2   9   1  373.16   29.50
   2   9  -1  443.76   49.40
   1  -9  -1   73.59   28.90
  -1  -9   1   68.79   19.80
  -1  -9   1   99.09   22.20
   1  -9  -1   74.39   19.20
   1  -9  -1   93.79   10.70
   1  -9  -1   74.29   18.80
  -1  -9   1   68.69   19.30
  -1  -9   1   83.89   31.20
   1   9  -1  107.39   21.60
   1   9  -1   44.50   26.70
  -1   9   1   91.59   22.10
   1   9  -1   44.10   26.80
  -1   9   1  134.99   41.00
  -1   9   1   82.19   11.50
   1   9  -1   52.69   18.30
   1   9  -1   52.69   17.90
  -1   9   1   91.39   21.60
   0  -9   1   25.20   11.80
   0  -9  -1   25.70   19.30
   0  -9   1   19.60   24.20
   0  -9  -1   35.30   10.10
   0  -9  -1   33.50   14.30
   0  -9  -1   33.50   14.00
   0   9  -1   46.20   16.80
   0   9   1   71.19   21.20
   0   9   1   49.60   21.70
   0   9  -1   30.00   20.50
   0   9   1   70.99   20.70
   0   9  -1   30.40   20.30
   0   9  -1   46.20   17.20
   0   9  -1   26.90   11.50
  -1  -9  -1   32.50   10.10
  -1  -9  -1   13.70    9.60
  -1  -9  -1   13.70    9.80
   1  -9   1   48.90   14.80
   1  -9   1    7.10   22.50
  -1   9  -1   23.00   22.50
  -1   9  -1   43.00   13.80
  -1   9  -1   23.20   22.30
   1   9   1   39.40   25.00
  -1   9  -1   43.00   14.10
   1   9   1   36.80   15.50
  -1   9  -1   23.90   10.50
   1   9   1   36.60   15.10
  -2  -9  -1   58.19   16.40
  -2  -9  -1   58.09   16.10
   2  -9   1  125.69   38.10
  -2  -9  -1   49.90   16.10
  -2   9  -1   64.89   18.90
   2   9   1  168.18   35.20
  -2   9  -1   81.79   19.00
   2   9   1  168.98   36.20
  -2   9  -1   42.20   26.20
  -2   9  -1   64.89   18.40
   2   9   1   78.79   39.70
  -2   9  -1   41.80   26.50
   3  -9   1   78.59   28.10
  -3  -9  -1   11.80   11.00
   3  -9   1   76.59   28.10
  -3  -9  -1   39.80   14.70
  -3  -9  -1   11.80   11.20
   3   9   1   37.10   29.00
  -3   9  -1   16.30   20.40
  -3   9  -1   54.39   18.20
   3   9   1   34.90   17.30
   3   9   1   34.80   16.80
  -3   9  -1   38.10   16.00
  -3   9  -1   16.50   20.10
  -3   9  -1   38.10   15.60
   4  -9   1   35.40   21.30
  -4  -9  -1   37.10   16.60
   4  -9   1   33.90   21.40
  -4  -9  -1   37.10   17.00
  -4  -9  -1   57.99   18.90
  -4   9  -1   58.99   18.50
  -4   9  -1   89.99   38.60
   4   9   1   96.29   28.70
  -4   9  -1   91.09   38.20
   4   9   1   47.40   36.10
  -4   9  -1   49.40   16.70
  -4   9  -1   58.99   18.00
   4   9   1   95.69   27.90
   5  -9   1   70.79   29.90
   5  -9   1   68.29   30.00
  -5  -9  -1   50.69   20.30
  -5  -9  -1   50.69   20.80
  -5  -9  -1   82.59   27.70
  -5   9  -1  130.29   29.00
   5   9   1    7.00   20.40
  -5   9  -1   31.30   28.30
  -5   9  -1   30.90   28.50
  -5   9  -1   52.79   18.10
  -5   9  -1   52.89   18.50
   5   9   1   32.80   27.70
   5   9   1    7.00   21.00
   6  -9   1   70.19   31.60
   6  -9   1   71.09   31.40
  -6  -9  -1   88.89   27.90
  -6  -9  -1  102.39   29.50
  -6  -9  -1   88.89   28.60
   6   9   1   84.89   41.20
  -6   9  -1   83.39   22.00
  -6   9  -1   82.49   22.20
  -6   9  -1  110.29   30.50
   6   9   1  144.19   37.30
   6   9   1  145.49   38.40
   7  -9   1   33.20   29.60
   7  -9   1   30.00   29.80
  -7  -9  -1   32.70   21.20
  -7  -9  -1   32.60   20.80
  -7  -9  -1   50.19   27.10
  -7   9  -1   88.59   30.70
   7   9   1    5.70   44.10
   7   9   1  135.39   35.20
   7   9   1  136.59   36.30
  -7   9  -1   89.19   30.30
  -8  -9  -1  139.69   35.20
  -8  -9  -1  116.79   39.50
   8  -9   1  138.49   39.00
  -8  -9  -1  139.69   34.40
   8  -9   1  134.59   39.30
   8   9   1  169.38   41.50
  -8   9  -1  146.89   34.80
  -8   9  -1  147.09   34.10
   8   9   1  170.98   42.80
   8   9   1   41.60   31.90
  -9  -9  -1   16.20   25.30
  -9  -9  -1   51.59   27.70
  -9  -9  -1   51.59   27.10
  -9   9  -1   -3.30   16.10
  -9   9  -1   -3.30   15.70
   9   9   1  -42.20   48.60
 -10  -9  -1  -20.70   28.50
 -10  -9  -1  -11.50   32.90
 -10  -9  -1  -20.70   29.20
  10   9   1  -17.70   48.50
 -10   9  -1   29.60   17.10
 -10   9  -1   29.90   17.60
 -11  -9  -1  -16.50   27.50
 -11  -9  -1  -23.30   25.90
 -11  -9  -1  -16.50   28.10
 -11   9  -1   29.40   15.30
 -11   9  -1   29.50   14.90
  11   9   1   20.00   64.59
 -11   9  -1   23.80   15.70
 -11   9  -1   23.60   15.30
 -11 -10   1   26.10   25.70
 -11 -10   1   26.00   25.10
 -11 -10   1   78.29   50.69
 -11  10   1   40.00   25.80
  11  10  -1  -18.20   40.80
 -10 -10   1  139.89   44.10
 -10 -10   1   95.19   41.40
 -10 -10   1  139.99   45.20
  10  10  -1  102.39   66.19
 -10  10   1  135.09   37.20
  -9 -10   1   18.60   27.90
  -9 -10   1   34.40   21.70
  -9 -10   1   34.40   21.20
   9  10  -1   75.69   34.70
   9  10  -1   63.39   48.60
   9  10  -1   76.29   35.80
  -8 -10   1  -16.40   12.80
  -8 -10   1   -2.60   12.20
  -8 -10   1   -2.60   12.50
  -8  10   1   -3.70    8.60
  -8  10   1   -3.60    8.70
   8  10  -1  -15.20   14.20
   8  10  -1  -15.20   14.60
  -8  10   1    9.10    6.50
  -8  10   1    9.10    6.60
   8  10  -1  -18.70   27.20
  -7 -10   1   49.80   20.50
   7 -10  -1   55.49   21.00
  -7 -10   1   49.80   20.00
  -7 -10   1   39.10   20.50
  -7  10   1   31.50   18.40
  -7  10   1   31.20   18.60
   7  10  -1   20.50   30.70
  -7  10   1   46.40   12.20
   7  10  -1   13.90   15.90
  -7  10   1   46.50   12.50
   7  10  -1   13.80   15.50
  -6 -10   1   -1.30   11.10
  -6 -10   1   -1.30   10.80
  -6 -10   1   21.70   18.50
   6 -10  -1   27.50   22.40
  -6  10   1   16.90   18.50
  -6  10   1   28.40   10.80
   6  10  -1   25.30   26.20
  -6  10   1   28.40   11.10
   6  10  -1   18.00   15.40
  -6  10   1   17.10   18.30
  -6  10   1   24.40   12.80
   6  10  -1   18.10   15.80
  -5 -10   1  191.88   64.39
  -5 -10   1  131.29   35.00
  -5 -10   1  122.99   35.30
   5 -10  -1  128.09   34.60
  -5 -10   1  122.89   34.50
  -5  10   1  102.49   19.70
   5  10  -1  119.39   49.60
   5  10  -1  129.99   35.10
  -5  10   1  102.29   19.30
  -5  10   1  122.69   35.20
   5  10  -1  129.49   34.20
  -5  10   1  122.99   24.50
  -5  10   1  123.99   34.80
  -4 -10   1   23.30   17.80
  -4 -10   1   10.60   13.50
   4 -10  -1   40.30   20.10
  -4 -10   1   23.50   18.30
  -4 -10   1   41.30   22.60
  -4  10   1   14.20   10.00
   4  10  -1  -24.00   25.80
  -4  10   1   14.20   10.20
  -4  10   1   11.30   22.60
   4  10  -1   14.80   13.40
  -4  10   1   11.40   22.30
   4  10  -1   14.90   13.80
   4  10  -1   10.30   14.90
  -4  10   1    0.10    7.70
   3 -10  -1   64.69   24.80
  -3 -10   1   50.69   15.90
  -3 -10   1   62.49   23.30
  -3 -10   1   62.39   22.80
  -3 -10   1   31.60   30.90
   3  10  -1   21.60   30.60
  -3  10   1   31.90   13.40
   3  10  -1   19.10   30.70
   3  10  -1   10.20   10.10
  -3  10   1   31.90   13.70
   3  10  -1   17.60   12.90
   3  10  -1   17.70   13.30
  -3  10   1   13.00   18.10
  -3  10   1   35.10   10.90
  -3  10   1   12.80   18.30
   2 -10  -1   19.90   21.40
  -2 -10   1   18.90   27.40
  -2 -10   1   36.80   16.00
  -2 -10   1    9.60   13.60
  -2 -10   1   36.70   15.60
   2  10  -1    6.70   10.10
  -2  10   1   21.30    6.40
   2  10  -1   38.20   28.40
  -2  10   1   14.70    9.80
   2  10  -1   42.80   16.70
  -2  10   1   16.10   25.60
  -2  10   1   17.90   25.40
   2  10  -1   39.30   28.30
  -2  10   1   14.70    9.50
   2  10  -1    6.70    9.90
  -1 -10   1  127.69   44.70
   1 -10  -1   62.39   18.40
  -1 -10   1   94.39   22.50
  -1 -10   1  109.99   28.00
   1 -10  -1   79.29   32.30
  -1 -10   1  109.79   27.40
   1 -10  -1   62.39   18.80
   1  10  -1  141.59   25.10
  -1  10   1   75.19   22.60
  -1  10   1   89.29   12.60
   1  10  -1   97.69   24.00
   1  10  -1   97.79   24.50
  -1  10   1   72.69   30.50
  -1  10   1   75.39   23.20
  -1  10   1   71.39   30.50
   1  10  -1   91.99   42.10
   1  10  -1   95.79   41.90
   0 -10   1  220.78   32.60
   0 -10  -1  184.08   51.69
   0 -10  -1  227.38   38.30
   0 -10  -1  234.38   24.00
   0 -10   1  341.67   67.39
   0 -10  -1  227.28   37.50
   0  10  -1  223.98   56.99
   0  10   1  248.18   41.30
   0  10   1  185.98   50.79
   0  10  -1  192.78   30.20
   0  10   1  247.38   40.40
   0  10  -1  268.87   41.90
   0  10  -1  220.78   57.39
   0  10  -1  268.97   42.80
  -1 -10  -1  360.56   52.89
  -1 -10  -1  396.96   37.00
   1 -10   1  322.57   66.79
   1 -10   1  387.76   37.70
  -1 -10  -1  360.66   51.89
   1  10   1  406.26   46.90
  -1  10  -1  425.16   45.90
  -1  10  -1  314.67   35.90
   1  10   1  404.76   45.90
   1  10   1  357.16   73.19
  -1  10  -1  356.86   70.29
  -1  10  -1  425.16   45.10
  -1  10  -1  361.16   69.59
  -2 -10  -1  400.26   40.70
   2 -10   1  424.26   80.29
  -2 -10  -1  466.85   50.69
  -2 -10  -1  466.85   51.59
   2  10   1  502.05   54.29
  -2  10  -1  452.75   76.69
   2  10   1  504.15   55.49
  -2  10  -1  448.06   77.59
   2  10   1  433.56   82.59
  -2  10  -1  336.97   41.60
  -2  10  -1  337.07   42.30
  -2  10  -1  389.86   41.30
  -3 -10  -1  422.06   62.19
   3 -10   1  507.55   81.19
  -3 -10  -1  453.95   49.10
  -3 -10  -1  421.86   60.99
  -3  10  -1  472.25   48.30
  -3  10  -1  522.85   50.09
  -3  10  -1  422.76   73.09
  -3  10  -1  418.26   73.89
  -3  10  -1  522.55   49.20
   3  10   1  513.45   58.19
   3  10   1  558.24  101.49
   3  10   1  510.75   56.89
  -4 -10  -1  497.75   57.09
   4 -10   1  452.75   77.89
  -4 -10  -1  401.76   48.90
  -4 -10  -1  497.85   58.19
   4  10   1  442.36   63.39
   4  10   1  444.96   64.99
  -4  10  -1  407.76   70.99
  -4  10  -1  496.35   52.09
  -4  10  -1  493.65   48.20
  -4  10  -1  494.05   49.10
  -4  10  -1  402.96   71.69
   4  10   1  373.86   85.59
   5 -10   1  137.39   44.40
   5 -10   1  143.79   44.40
  -5 -10  -1  161.28   39.00
  -5 -10  -1  215.38   43.30
  -5 -10  -1  161.38   39.90
  -5  10  -1  175.68   49.30
  -5  10  -1  193.08   38.00
  -5  10  -1  188.18   32.30
  -5  10  -1  173.38   49.80
   5  10   1  108.39   40.10
  -5  10  -1  188.48   33.00
   5  10   1  153.38   38.30
   5  10   1  154.38   39.40
  -6 -10  -1  187.68   42.70
  -6 -10  -1  330.97   52.99
   6 -10   1  211.78   48.00
  -6 -10  -1  187.58   41.80
   6 -10   1  214.48   47.90
  -6  10  -1  218.48   33.80
  -6  10  -1  181.58   39.40
  -6  10  -1  218.78   34.50
   6  10   1  339.67   59.79
  -6  10  -1  184.18   49.10
   6  10   1  337.07   58.09
  -6  10  -1  186.38   48.60
   6  10   1  294.97   67.29
  -7 -10  -1  401.76   67.39
  -7 -10  -1  447.56   69.29
   7 -10   1  367.96   63.89
  -7 -10  -1  447.86   70.79
   7 -10   1  374.26   63.79
   7  10   1  460.55   75.29
  -7  10  -1  426.46   69.79
   7  10   1  288.87   88.39
  -7  10  -1  471.05   65.59
   7  10   1  456.75   73.19
  -7  10  -1  377.16   44.90
  -7  10  -1  422.96   70.69
  -7  10  -1  376.76   44.10
  -8 -10  -1   66.49   26.70
  -8 -10  -1   66.59   27.30
  -8 -10  -1  120.59   37.00
  -8  10  -1  108.59   29.60
   8  10   1   52.89   35.60
  -8  10  -1  109.09   29.00
  -8  10  -1   50.59   32.80
   8  10   1   52.49   34.60
  -8  10  -1  107.69   25.80
  -8  10  -1  107.49   25.20
   8  10   1   90.49   51.29
  -9 -10  -1   78.29   33.10
  -9 -10  -1   80.69   41.20
  -9 -10  -1   78.19   32.30
   9 -10   1   39.70   31.20
   9  10   1   38.60   49.10
  -9  10  -1   74.69   19.30
  -9  10  -1   32.70   18.20
  -9  10  -1   32.90   18.60
  -9  10  -1   19.30   33.20
  -9  10  -1   74.59   18.80
 -10 -10  -1   16.90   26.40
 -10 -10  -1    8.50   35.50
 -10 -10  -1   16.90   27.00
 -10  10  -1    9.00   16.60
 -10  10  -1    9.00   17.00
 -10  10  -1   35.50   18.80
  10  10   1  -22.00   36.10
 -10  10  -1   35.20   18.20
 -11 -11   1   43.30   30.50
 -11 -11   1   11.60   35.50
 -11 -11   1   43.30   29.80
 -11  11   1    1.90   26.80
  11  11  -1  -71.89   73.69
 -10 -11   1   14.80   20.50
 -10 -11   1    2.80   34.10
 -10 -11   1   14.80   21.00
  10  11  -1   71.69   56.09
 -10  11   1   30.90   23.20
  -9 -11   1   71.79   36.20
  -9 -11   1   71.79   37.10
  -9 -11   1   54.29   32.60
   9  11  -1   76.99   49.99
  -8 -11   1  103.59   36.10
  -8 -11   1   80.09   34.00
  -8 -11   1  103.69   36.90
  -8  11   1   26.70   24.40
  -8  11   1   50.39   11.90
  -8  11   1   50.19   11.60
   8  11  -1   43.90   60.39
   8  11  -1   65.69   26.50
  -8  11   1   27.90   16.10
   8  11  -1   65.29   25.80
  -8  11   1   27.80   16.40
   7 -11  -1  113.89   30.90
  -7 -11   1  108.79   35.00
  -7 -11   1  110.29   37.10
  -7 -11   1  108.69   34.20
  -7  11   1  128.29   33.60
  -7  11   1  117.69   20.60
  -7  11   1   97.39   26.30
  -7  11   1  126.79   33.90
   7  11  -1   63.99   53.09
   7  11  -1  219.68   47.30
   7  11  -1  220.98   48.70
  -7  11   1  117.99   21.00
  -6 -11   1  570.94   63.59
  -6 -11   1  402.96   63.99
  -6 -11   1  571.24   64.89
   6 -11  -1  427.26   61.09
  -6  11   1  424.36   64.89
   6  11  -1  405.66   95.19
   6  11  -1  373.36   63.69
  -6  11   1  446.66   41.10
  -6  11   1  443.56   46.60
   6  11  -1  371.56   62.29
  -6  11   1  447.36   41.70
  -6  11   1  429.56   64.29
  -5 -11   1  780.32   83.69
   5 -11  -1  601.64   76.59
  -5 -11   1  779.82   82.29
  -5 -11   1  836.02  139.99
   5  11  -1  955.20   87.09
  -5  11   1  701.73   79.69
   5  11  -1  778.22  134.89
  -5  11   1  859.61   66.59
  -5  11   1  693.83   80.39
  -5  11   1  858.31   65.69
  -5  11   1  862.51   65.89
   5  11  -1  958.50   88.89
   4 -11  -1  371.26   63.89
  -4 -11   1  328.07   54.69
  -4 -11   1  346.27   86.39
  -4 -11   1  328.37   55.89
  -4  11   1  353.06   65.19
  -4  11   1  349.47   65.99
   4  11  -1  266.37   49.60
  -4  11   1  340.17   38.20
   4  11  -1  434.26   48.00
  -4  11   1  339.67   37.50
  -4  11   1  368.86   33.50
   4  11  -1  265.57   48.50
   4  11  -1  287.17   73.89
   4  11  -1  294.97   73.89
   3 -11  -1  476.05   76.79
  -3 -11   1  407.56   60.89
  -3 -11   1  443.56   47.90
  -3 -11   1  407.96   62.19
  -3 -11   1  520.75   99.79
   3  11  -1  464.05   65.79
   3  11  -1  463.15   64.39
  -3  11   1  402.96   33.50
   3  11  -1  413.46   46.40
   3  11  -1  390.06   85.29
  -3  11   1  392.46   76.99
   3  11  -1  402.36   85.09
  -3  11   1  400.46   43.10
  -3  11   1  400.66   43.90
  -3  11   1  397.86   76.39
  -2 -11   1  438.16   91.49
   2 -11  -1  351.86   69.99
  -2 -11   1  444.26   50.99
  -2 -11   1  443.66   49.99
  -2 -11   1  400.36   44.10
  -2  11   1  412.96   46.40
   2  11  -1  359.36   57.09
   2  11  -1  454.95   87.29
  -2  11   1  412.06   45.40
  -2  11   1  371.36   71.69
  -2  11   1  315.27   27.50
   2  11  -1  358.86   55.89
  -2  11   1  378.26   71.29
   2  11  -1  462.85   86.89
   2  11  -1  448.96   44.80
   1 -11  -1  146.19   29.80
   1 -11  -1  136.99   15.50
  -1 -11   1  165.88   55.59
   1 -11  -1  233.18   57.99
  -1 -11   1  171.38   30.50
  -1 -11   1  134.59   32.60
   1 -11  -1  146.29   30.50
  -1 -11   1  134.79   33.30
   1  11  -1  131.59   31.00
  -1  11   1  108.29   15.90
   1  11  -1  215.08   59.99
   1  11  -1  218.58   59.59
  -1  11   1  158.98   34.00
  -1  11   1  147.49   46.00
   1  11  -1  133.69   26.30
  -1  11   1  158.48   33.20
   1  11  -1  131.49   30.30
  -1  11   1  143.29   46.00
   0 -11  -1  470.55   53.99
   0 -11  -1  658.63   96.99
   0 -11   1  548.45   47.80
   0 -11  -1  470.75   54.99
   0 -11   1  490.65   87.99
   0 -11  -1  538.75   42.20
   0  11  -1  529.55   47.90
   0  11   1  442.26   53.59
   0  11  -1  789.62  110.79
   0  11   1  440.96   52.59
   0  11   1  543.05   93.29
   0  11  -1  778.62  111.79
   0  11  -1  522.65   56.19
   0  11  -1  522.55   55.29
   1 -11   1  259.47   65.39
  -1 -11  -1  248.78   43.00
  -1 -11  -1  248.98   43.90
  -1 -11  -1  310.57   32.30
   1 -11   1  307.47   34.30
  -1  11  -1  206.48   61.29
   1  11   1  325.37   50.59
   1  11   1  381.86   79.99
  -1  11  -1  245.88   43.20
   1  11   1  324.07   49.40
  -1  11  -1  208.88   60.59
  -1  11  -1  246.08   44.10
  -1  11  -1  253.87   37.80
  -2 -11  -1   77.99   25.00
   2 -11   1   62.09   35.40
  -2 -11  -1   77.89   25.60
  -2 -11  -1  111.39   23.80
   2  11   1   55.49   25.20
   2  11   1   55.29   24.50
  -2  11  -1   93.79   22.30
   2  11   1   65.89   39.10
  -2  11  -1   61.59   17.70
  -2  11  -1  101.29   39.40
  -2  11  -1  100.19   39.90
  -2  11  -1   61.49   17.30
   3 -11   1   63.99   33.30
  -3 -11  -1  170.18   38.30
  -3 -11  -1  118.19   28.00
  -3 -11  -1  170.28   39.20
   3  11   1  146.79   58.79
   3  11   1  160.28   39.00
  -3  11  -1  143.69   28.40
  -3  11  -1  111.69   41.20
  -3  11  -1  143.79   29.00
   3  11   1  161.18   40.10
  -3  11  -1  121.49   27.70
  -3  11  -1  112.89   40.70
  -4 -11  -1  183.88   41.40
  -4 -11  -1  183.88   40.40
  -4 -11  -1  191.78   38.20
   4 -11   1  103.79   39.70
  -4  11  -1  188.28   36.90
  -4  11  -1   74.29   33.80
   4  11   1  254.77   47.60
   4  11   1  171.28   62.19
  -4  11  -1  162.98   30.80
   4  11   1  253.27   46.30
  -4  11  -1   75.09   33.40
  -4  11  -1  163.08   31.40
   5 -11   1   22.20   28.30
  -5 -11  -1   27.50   20.60
  -5 -11  -1   27.50   20.10
  -5 -11  -1    7.50   16.50
  -5  11  -1    9.70   12.20
  -5  11  -1   45.10   30.80
  -5  11  -1   44.50   31.10
   5  11   1  -44.80   36.30
  -5  11  -1    9.70   11.90
   5  11   1   10.60   12.70
   5  11   1   11.20   13.00
  -5  11  -1  -16.30   15.70
   6 -11   1  130.29   32.70
  -6 -11  -1   93.69   32.20
  -6 -11  -1  123.79   34.70
  -6 -11  -1   93.49   32.90
   6  11   1   50.89   27.60
  -6  11  -1   85.59   21.30
  -6  11  -1   85.49   21.80
   6  11   1  104.49   54.29
  -6  11  -1   96.19   35.00
  -6  11  -1   94.99   35.40
  -6  11  -1   93.29   31.50
   6  11   1   51.29   28.40
  -7 -11  -1   34.40   22.20
  -7 -11  -1   -5.10   19.20
  -7 -11  -1   -5.10   18.70
  -7  11  -1  -32.40   18.30
   7  11   1    4.50   19.80
   7  11   1    4.50   19.20
  -7  11  -1   -6.40   25.00
  -7  11  -1   17.60   17.60
  -7  11  -1   -6.50   24.70
  -7  11  -1   17.60   17.20
   7  11   1   11.00   48.00
  -8 -11  -1   16.70   19.60
  -8 -11  -1   16.70   20.00
  -8 -11  -1   52.79   28.10
   8 -11   1   10.30   30.50
  -8  11  -1   11.50   24.10
  -8  11  -1   22.70   18.90
   8  11   1   29.70   26.10
  -8  11  -1   22.70   19.40
  -8  11  -1   11.40   24.50
  -8  11  -1   19.90   23.00
   8  11   1    3.80   32.40
   8  11   1   29.40   25.30
  -9 -11  -1   22.60   29.00
  -9 -11  -1   18.70   32.30
  -9 -11  -1   22.60   28.20
  -9  11  -1   54.29   19.90
  -9  11  -1   -0.40   19.10
   9  11   1   30.90   58.49
  -9  11  -1   54.29   20.40
  -9  11  -1   41.40   32.20
  -9  11  -1   -0.40   19.60
 -10 -11  -1   70.29   33.40
 -10 -11  -1   70.29   32.70
 -10 -11  -1   29.40   37.40
  10  11   1    7.20   41.60
 -10  11  -1   28.30   18.90
 -10  11  -1   24.10   18.60
 -10  11  -1   28.10   18.30
 -10  11  -1   24.20   18.20
 -10  11  -1   28.30   38.40
 -10 -12   1   45.70   38.20
 -10 -12   1   17.00   31.20
 -10 -12   1   16.90   30.40
 -10  12   1    6.90   24.60
  10  12  -1   46.00   53.09
 -10  12   1  -23.60   30.00
  10  12  -1   41.70   53.19
  -9 -12   1   59.89   26.80
  -9 -12   1   72.69   29.20
  -9 -12   1   72.79   29.90
  -9  12   1   94.49   36.50
  -9  12   1   46.70    6.70
   9  12  -1   60.79   68.19
  -9  12   1   71.09    7.40
  -9  12   1   47.00    6.90
  -8 -12   1   97.69   39.20
  -8 -12   1   78.89   34.90
  -8 -12   1   97.69   38.30
  -8  12   1   49.99   14.00
   8  12  -1  102.59   34.10
  -8  12   1   51.99   19.50
  -8  12   1   49.80   13.70
   8  12  -1  115.79   60.39
  -8  12   1   52.39   19.20
  -8  12   1   92.69   29.40
   8  12  -1  103.29   35.10
  -7 -12   1   25.50   27.90
  -7 -12   1   73.49   28.80
   7 -12  -1   27.40   21.00
  -7 -12   1   25.40   27.20
   7  12  -1   50.49   25.40
  -7  12   1   60.09   15.80
  -7  12   1   60.29   29.40
   7  12  -1    9.90   55.59
  -7  12   1   59.89   15.40
  -7  12   1   59.49   29.70
   7  12  -1   50.79   26.10
  -7  12   1   50.89   19.20
  -6 -12   1    1.10   19.80
  -6 -12   1    1.20   20.30
  -6 -12   1    5.50   19.40
   6 -12  -1  -23.90   22.80
  -6  12   1  -12.10   11.60
  -6  12   1   15.80   21.80
  -6  12   1   15.60   22.00
  -6  12   1   -5.00    9.80
   6  12  -1    1.90   16.10
  -6  12   1   -5.00   10.10
   6  12  -1  -25.40   45.30
   6  12  -1    2.00   16.60
  -5 -12   1    8.30   17.70
  -5 -12   1    8.20   17.20
  -5 -12   1   43.40   21.20
   5 -12  -1   10.30   28.70
   5  12  -1   24.20   24.80
   5  12  -1   58.29   40.70
   5  12  -1   24.50   25.50
   5  12  -1   57.39   40.70
  -5  12   1   37.10   16.20
  -5  12   1   68.49   25.90
  -5  12   1   27.30   13.80
  -5  12   1   37.00   15.80
  -5  12   1   69.29   25.60
  -4 -12   1   69.09   24.80
  -4 -12   1   74.59   46.90
   4 -12  -1   46.10   29.00
  -4 -12   1   68.99   24.20
  -4 -12   1   70.29   25.20
   4  12  -1   73.19   31.20
   4  12  -1   76.99   47.70
  -4  12   1   47.70   16.50
   4  12  -1   76.89   47.70
  -4  12   1   86.29   17.30
   4  12  -1   73.49   32.00
  -4  12   1  117.49   36.50
  -4  12   1  116.19   36.90
  -4  12   1   47.50   16.20
  -3 -12   1  -11.30    9.60
  -3 -12   1    9.60   14.50
  -3 -12   1  -13.40   28.40
   3 -12  -1  -12.60   19.00
  -3 -12   1    9.60   14.20
  -3  12   1   46.10   31.10
  -3  12   1   46.70   30.80
  -3  12   1   17.40   13.30
   3  12  -1   11.60   15.90
   3  12  -1   11.60   16.30
   3  12  -1  -26.40   18.40
  -3  12   1    7.00    6.40
   3  12  -1  -26.10   18.50
  -3  12   1   17.30   12.90
   3  12  -1   10.10   11.70
   2 -12  -1   52.79   22.20
  -2 -12   1   63.79   23.20
  -2 -12   1   38.70   20.70
  -2 -12   1   42.50   35.40
   2 -12  -1   52.79   21.70
  -2 -12   1   63.89   23.80
   2 -12  -1   77.19   40.70
  -2  12   1  152.28   42.40
  -2  12   1   93.09   12.60
   2  12  -1   71.39   21.10
   2  12  -1   74.89   22.50
  -2  12   1  138.69   27.90
   2  12  -1  137.69   53.69
  -2  12   1  139.09   28.60
   2  12  -1  139.99   53.49
   2  12  -1   74.99   23.10
  -2  12   1  153.98   42.20
  -1 -12   1   44.30   16.70
   1 -12  -1   54.69   18.00
   1 -12  -1   95.59   41.00
   1 -12  -1   54.79   18.50
  -1 -12   1   37.80   38.10
  -1  12   1   53.19   17.70
  -1  12   1  147.19   46.40
   1  12  -1   40.90   24.40
   1  12  -1   45.80   14.40
   1  12  -1   54.79   31.40
  -1  12   1   52.99   17.30
   1  12  -1   41.00   25.00
  -1  12   1  142.19   46.50
   1  12  -1   51.59   31.60
   0 -12  -1  115.19   19.90
   0 -12  -1  120.39   32.10
   0 -12  -1  120.29   31.40
   0 -12  -1  113.69   46.50
   0 -12   1  129.19   25.90
   0 -12   1   84.39   32.40
   0  12   1  111.89   26.80
   0  12   1  112.29   27.50
   0  12  -1  100.29   22.40
   0  12  -1   79.29   31.20
   0  12   1  106.99   42.60
   0  12  -1  153.58   33.90
   0  12  -1   78.19   31.50
   0  12  -1  153.48   33.10
   1 -12   1  195.98   31.70
  -1 -12  -1  144.79   27.10
   1 -12   1  313.77   71.69
  -1 -12  -1  266.57   46.40
  -1 -12  -1  266.77   47.40
  -1  12  -1  225.48   41.60
  -1  12  -1  214.68   33.90
  -1  12  -1  225.38   40.70
  -1  12  -1  272.17   65.09
   1  12   1  163.98   51.99
   1  12   1  183.98   42.90
   1  12   1  183.18   41.90
  -1  12  -1  275.27   64.39
  -2 -12  -1  173.08   36.60
  -2 -12  -1  173.18   37.40
  -2 -12  -1  176.18   34.50
   2 -12   1  296.87   60.79
  -2  12  -1  261.17   43.70
  -2  12  -1  261.27   42.80
  -2  12  -1  166.88   31.50
   2  12   1  226.98   47.20
  -2  12  -1  184.38   56.69
   2  12   1  300.97   68.79
  -2  12  -1  182.48   57.39
   2  12   1  225.88   46.00
  -3 -12  -1  136.49   29.30
  -3 -12  -1  126.39   35.90
   3 -12   1  127.59   46.00
  -3 -12  -1  126.49   36.70
  -3  12  -1  128.69   29.10
  -3  12  -1  128.59   28.50
  -3  12  -1  121.89   45.40
   3  12   1  106.89   56.09
  -3  12  -1  128.89   27.70
   3  12   1  104.39   31.20
   3  12   1  104.99   32.10
  -3  12  -1  123.19   44.90
  -4 -12  -1  101.99   28.70
  -4 -12  -1   87.39   30.50
   4 -12   1   99.59   43.60
  -4 -12  -1   87.39   29.80
  -4  12  -1  119.39   28.00
  -4  12  -1   69.09   24.10
  -4  12  -1   67.89   36.90
  -4  12  -1   69.19   24.60
   4  12   1  106.89   38.00
   4  12   1  106.29   36.90
   4  12   1   52.89   32.30
  -4  12  -1   67.19   37.30
   5 -12   1  423.46   74.59
  -5 -12  -1  324.07   61.89
  -5 -12  -1  323.97   60.59
  -5 -12  -1  403.36   61.99
  -5  12  -1  433.26   49.30
   5  12   1  416.66   93.09
   5  12   1  399.76   67.49
  -5  12  -1  433.16   48.40
  -5  12  -1  363.66   75.39
  -5  12  -1  307.27   51.89
   5  12   1  397.06   65.69
  -5  12  -1  359.16   76.09
  -6 -12  -1  267.97   55.89
  -6 -12  -1  267.97   57.19
   6 -12   1  148.99   51.89
  -6 -12  -1  261.37   52.99
  -6  12  -1  229.28   48.00
   6  12   1  125.59   64.19
  -6  12  -1  298.27   44.70
  -6  12  -1  238.18   61.09
  -6  12  -1  235.18   61.69
   6  12   1  285.07   56.79
   6  12   1  287.27   58.39
  -6  12  -1  298.47   45.70
  -7 -12  -1   49.70   29.70
  -7 -12  -1   73.49   31.40
  -7 -12  -1   49.70   29.00
   7  12   1   79.39   62.49
  -7  12  -1   90.69   24.60
  -7  12  -1   47.00   24.10
  -7  12  -1   79.99   29.60
  -7  12  -1   79.19   30.00
  -7  12  -1   90.79   25.20
   7  12   1    3.40   22.00
   7  12   1    3.30   21.40
  -8 -12  -1   78.79   28.10
  -8 -12  -1   78.79   27.50
  -8 -12  -1   56.89   27.10
   8  12   1   47.30   49.10
  -8  12  -1   44.20   22.20
  -8  12  -1   58.69   26.10
   8  12   1   54.29   42.10
  -8  12  -1   58.29   26.50
  -8  12  -1   56.79   31.40
  -8  12  -1   44.20   21.70
   8  12   1   53.59   40.80
  -9 -12  -1   32.20   27.60
  -9 -12  -1   86.39   36.90
  -9 -12  -1   86.29   36.00
  -9  12  -1   30.00   24.80
  -9  12  -1   29.90   25.30
  -9  12  -1   33.50   32.00
   9  12   1  209.98   87.19
  -9  12  -1   71.79   21.20
  -9  12  -1   71.89   21.70
 -10 -13   1   58.09   39.60
 -10 -13   1   61.89   32.40
 -10 -13   1   61.89   33.20
  10  13  -1   20.50   72.79
 -10  13   1   19.10   27.80
 -10  13   1   19.00   24.30
  10  13  -1   -0.80   72.79
  -9 -13   1   81.99   39.00
  -9 -13   1   23.70   21.10
  -9 -13   1   23.70   20.60
   9  13  -1   36.60   59.49
  -9  13   1  -19.70   17.80
  -9  13   1   11.40    7.40
   9  13  -1   35.10   59.39
  -9  13   1   11.30    7.20
  -9  13   1    7.80   25.10
  -8 -13   1   78.39   33.60
  -8 -13   1   78.59   32.80
  -8 -13   1   33.30   20.70
  -8  13   1   46.60   15.00
  -8  13   1   63.49   29.60
  -8  13   1   46.40   14.60
   8  13  -1  101.99   52.39
  -8  13   1   75.09   22.70
   8  13  -1   94.39   38.80
   8  13  -1   93.79   37.70
  -8  13   1   74.39   22.90
   8  13  -1  104.59   52.29
  -7 -13   1  255.77   54.39
  -7 -13   1  122.19   37.80
  -7 -13   1  255.57   53.19
  -7  13   1  208.38   37.80
  -7  13   1  198.98   30.50
  -7  13   1  140.59   38.40
   7  13  -1  295.87   88.39
  -7  13   1  199.68   31.20
   7  13  -1  174.58   48.50
  -7  13   1  142.39   38.00
   7  13  -1  292.27   88.29
   7  13  -1  173.58   47.20
   6 -13  -1   37.50   31.00
  -6 -13   1   13.80   23.60
  -6 -13   1   48.60   27.50
  -6 -13   1   13.80   24.10
   6  13  -1   23.60   29.40
  -6  13   1   21.40   16.40
   6  13  -1   34.80   59.19
  -6  13   1   45.70   17.50
   6  13  -1   23.70   30.20
   6  13  -1   37.90   59.19
  -6  13   1   32.20   24.10
  -6  13   1   45.60   17.10
  -6  13   1   31.80   24.40
   5 -13  -1  180.88   48.00
  -5 -13   1  143.69   36.00
  -5 -13   1  197.88   42.30
  -5 -13   1  143.79   36.80
  -5  13   1  170.78   32.30
   5  13  -1  165.18   45.60
   5  13  -1   75.29   50.09
  -5  13   1  154.68   45.00
   5  13  -1   69.59   50.19
  -5  13   1  156.38   44.40
  -5  13   1  208.68   29.10
  -5  13   1  171.08   33.10
   5  13  -1  165.78   46.80
  -4 -13   1  175.48   69.39
  -4 -13   1  107.19   30.10
   4 -13  -1   59.29   40.40
  -4 -13   1   67.39   27.80
  -4 -13   1   67.49   28.50
   4  13  -1   65.19   29.20
  -4  13   1   91.29   23.60
  -4  13   1   91.09   23.00
   4  13  -1  193.28   81.29
   4  13  -1   64.99   28.50
   4  13  -1  196.08   81.09
  -4  13   1   57.59   36.50
  -4  13   1   58.19   36.00
  -4  13   1  100.59   18.60
  -3 -13   1  118.29   32.10
   3 -13  -1  205.78   54.29
  -3 -13   1  257.07   73.09
  -3 -13   1  148.69   40.80
  -3 -13   1  148.49   39.80
   3  13  -1  199.28   38.00
  -3  13   1  132.39   46.10
  -3  13   1  237.18   41.70
  -3  13   1  174.08   17.40
   3  13  -1  230.88   48.80
  -3  13   1  236.48   40.70
   3  13  -1   92.29   47.70
   3  13  -1  230.38   47.60
   3  13  -1   88.79   47.90
  -3  13   1  130.69   46.60
  -2 -13   1  350.46   49.70
  -2 -13   1  376.66   57.59
  -2 -13   1  359.56   82.69
   2 -13  -1  371.86   78.99
  -2 -13   1  377.16   58.79
  -2  13   1  312.07   25.10
   2  13  -1  272.77   50.79
  -2  13   1  448.66   60.39
  -2  13   1  447.36   58.99
  -2  13   1  234.38   62.99
   2  13  -1  355.46   80.39
  -2  13   1  233.58   63.49
   2  13  -1  273.37   51.99
   2  13  -1  374.46   50.09
   2  13  -1  361.26   79.89
   1 -13  -1  508.85   60.69
  -1 -13   1  579.74   55.99
   1 -13  -1  498.95   96.09
  -1 -13   1  658.63  120.59
   1 -13  -1  508.25   59.59
   1  13  -1  550.14   66.69
  -1  13   1  693.73   68.39
   1  13  -1  599.74   54.79
  -1  13   1  571.54   97.49
   1  13  -1  518.75   99.29
  -1  13   1  691.53   66.99
   1  13  -1  549.25   65.49
   1  13  -1  526.65   98.59
  -1  13   1  560.94   97.79
   0 -13  -1  150.48   34.90
   0 -13   1  103.19   23.20
   0 -13   1  175.98   62.09
   0 -13  -1  150.38   34.10
   0 -13  -1  118.79   20.30
   0  13  -1  209.78   62.69
   0  13   1   77.39   45.50
   0  13  -1  154.48   34.60
   0  13   1  117.89   28.90
   0  13   1   91.09   45.40
   0  13  -1  207.08   63.29
   0  13   1  117.49   28.20
   0  13  -1  154.28   33.80
   0  13  -1  118.59   24.50
   1 -13   1  176.28   29.80
  -1 -13  -1  136.49   27.60
   1 -13   1  162.38   50.59
  -1 -13  -1  206.88   41.60
  -1 -13  -1  207.18   42.60
   1  13   1  230.88   46.50
   1  13   1  229.78   45.30
  -1  13  -1  165.48   38.80
   1  13   1  150.38   56.79
  -1  13  -1  254.97   68.29
  -1  13  -1  257.97   67.49
  -1  13  -1  165.48   38.00
  -1  13  -1  176.78   32.50
  -2 -13  -1  172.08   33.20
  -2 -13  -1  226.58   45.10
   2 -13   1  153.38   58.79
  -2 -13  -1  226.38   44.10
   2  13   1  175.88   39.70
  -2  13  -1  180.88   32.30
   2  13   1  175.18   38.70
  -2  13  -1  180.68   37.50
  -2  13  -1  180.78   38.30
  -2  13  -1  232.98   62.89
   2  13   1  140.79   56.19
  -2  13  -1  230.48   63.69
  -3 -13  -1   16.40   21.20
   3 -13   1   45.20   34.50
  -3 -13  -1   16.40   21.70
  -3 -13  -1   26.30   12.30
  -3  13  -1   30.50   30.20
   3  13   1  -22.00   36.10
  -3  13  -1   24.60   14.80
  -3  13  -1   30.90   29.80
  -3  13  -1   21.90   16.60
   3  13   1   61.49   26.10
   3  13   1   61.79   26.90
  -3  13  -1   24.60   15.20
  -4 -13  -1  100.29   29.60
  -4 -13  -1   70.89   27.00
  -4 -13  -1   70.89   27.60
  -4  13  -1   88.79   27.60
   4  13   1  113.39   41.50
   4  13   1  140.39   53.39
   4  13   1  112.69   40.40
  -4  13  -1   70.89   22.50
  -4  13  -1   53.99   35.50
  -4  13  -1   53.39   35.90
  -4  13  -1   70.99   23.00
   5 -13   1   55.49   49.00
  -5 -13  -1   -5.20   20.90
  -5 -13  -1   -5.20   21.40
  -5 -13  -1    2.20   14.90
  -5  13  -1   -1.60   13.70
  -5  13  -1   19.40   17.10
   5  13   1   28.60   22.20
  -5  13  -1   -1.60   13.40
  -5  13  -1   33.50   32.00
  -5  13  -1   33.10   32.30
   5  13   1   28.40   21.50
   5  13   1   20.70   51.79
  -6 -13  -1   29.60   23.10
  -6 -13  -1   23.60   26.00
  -6 -13  -1   23.60   25.40
  -6  13  -1    6.70   29.90
  -6  13  -1   21.70   23.20
   6  13   1   61.09   30.30
   6  13   1   60.69   29.40
  -6  13  -1    6.50   30.20
   6  13   1  -28.70   46.60
  -6  13  -1    5.10   18.00
  -6  13  -1    5.20   17.60
  -7 -13  -1   31.20   20.10
  -7 -13  -1   -4.20   25.70
  -7 -13  -1   -4.10   25.10
  -7  13  -1   -1.20   24.90
  -7  13  -1   -1.10   24.60
   7  13   1   -6.90   30.00
  -7  13  -1   14.80   18.00
  -7  13  -1   14.80   18.40
   7  13   1   36.10   54.19
   7  13   1   -6.80   30.90
  -7  13  -1   -5.00   22.60
  -8 -13  -1    2.10   26.20
  -8 -13  -1   22.60   30.30
  -8 -13  -1    2.10   26.80
  -8  13  -1    8.40   19.00
  -8  13  -1  -12.80   27.90
   8  13   1  -48.80   36.10
  -8  13  -1   32.00   29.50
  -8  13  -1  -12.90   27.50
  -8  13  -1    8.40   18.60
  -9 -13  -1   30.90   27.30
  -9 -13  -1  -20.50   31.50
  -9 -13  -1   30.80   26.70
  -9  13  -1   -8.40   33.10
   9  13   1  -28.20   48.70
  -9  13  -1   37.80   23.20
  -9  13  -1   37.80   22.70
  -9  13  -1   49.99   27.00
  -9  13  -1   49.90   27.50
  -9 -14   1   57.99   27.80
  -9 -14   1   54.99   43.10
  -9 -14   1   57.09   28.50
   9  14  -1   -9.00   54.79
  -9  14   1   24.30   11.00
  -9  14   1   37.60   23.60
  -9  14   1   29.10   15.30
  -9  14   1   24.20   10.70
  -9  14   1   70.79   30.60
  -9  14   1   29.00   15.60
   9  14  -1  -13.70   54.79
  -8 -14   1   17.40   22.20
  -8 -14   1   17.30   21.70
  -8 -14   1  -25.40   26.80
   8  14  -1  -42.90   41.10
  -8  14   1   18.60   13.70
  -8  14   1   14.60   21.50
  -8  14   1   14.50   21.80
   8  14  -1  -38.30   41.00
  -8  14   1  -26.70   20.90
  -8  14   1   18.50   13.30
  -7 -14   1   35.00   24.10
  -7 -14   1   35.00   24.70
  -7 -14   1   62.09   25.60
  -7  14   1   42.40   28.20
   7  14  -1   34.20   33.00
   7  14  -1   35.10   34.00
  -7  14   1   41.90   28.40
  -7  14   1   32.00   17.80
  -7  14   1   27.70   20.80
   7  14  -1   45.50   50.39
  -7  14   1   31.80   17.40
   7  14  -1   51.69   50.19
  -6 -14   1   45.40   27.40
  -6 -14   1   85.59   29.70
  -6 -14   1   85.59   29.00
   6  14  -1   61.59   33.50
  -6  14   1   40.90   17.80
  -6  14   1   49.90   17.20
   6  14  -1   50.39   46.00
  -6  14   1   20.60   25.40
  -6  14   1   49.99   17.60
   6  14  -1   53.49   46.10
  -6  14   1   20.40   25.70
   6  14  -1   61.39   34.50
  -5 -14   1   35.10   23.20
  -5 -14   1   44.80   23.30
  -5 -14   1   35.10   23.80
  -5  14   1   -3.40   14.40
  -5  14   1   -3.50   14.80
   5  14  -1   79.29   51.09
   5  14  -1   72.19   51.19
   5  14  -1   49.99   25.70
  -5  14   1   41.80   26.80
  -5  14   1   41.30   27.10
   5  14  -1   49.50   25.10
  -4 -14   1  -56.49   43.30
  -4 -14   1    4.00   18.20
  -4 -14   1   13.40   16.50
  -4 -14   1    4.00   17.80
   4  14  -1   37.60   27.50
  -4  14   1   27.60   14.60
  -4  14   1  -12.40   27.70
   4  14  -1   37.70   28.20
   4  14  -1   35.10   51.39
  -4  14   1   27.70   15.00
   4  14  -1   35.80   51.69
  -4  14   1   11.80    7.60
  -4  14   1  -12.40   27.30
  -3 -14   1   65.59   28.20
  -3 -14   1   16.60   34.80
  -3 -14   1   65.69   28.90
  -3 -14   1   21.70   14.50
   3  14  -1   78.59   29.30
  -3  14   1   36.70   18.30
  -3  14   1   28.50    6.80
  -3  14   1    1.80   25.10
   3  14  -1   16.30   32.80
  -3  14   1    1.80   25.40
   3  14  -1   78.79   30.10
  -3  14   1   36.60   17.80
   3  14  -1   15.40   32.60
   3  14  -1   33.50   16.10
  -2 -14   1  -23.20   11.40
   2 -14  -1   16.70   34.70
  -2 -14   1  -23.20   11.70
  -2 -14   1   17.60   14.70
  -2 -14   1   -1.70   46.80
  -2  14   1    8.30   16.50
  -2  14   1   27.20   24.70
  -2  14   1    8.30   16.90
   2  14  -1  -14.60   19.00
   2  14  -1  -14.90   19.50
   2  14  -1    3.20   26.10
   2  14  -1    2.30   26.30
  -2  14   1   26.80   24.90
   2  14  -1  -16.10   12.40
   1 -14  -1   63.19   27.10
  -1 -14   1  107.69   44.90
  -1 -14   1   75.49   23.20
   1 -14  -1   63.29   27.80
   1  14  -1  112.79   53.29
  -1  14   1  112.99   51.59
   1  14  -1   40.30   23.10
  -1  14   1  111.79   51.89
   1  14  -1   40.30   22.60
   1  14  -1   98.29   23.50
   1  14  -1  113.99   52.89
   0 -14  -1   61.99   23.00
   0 -14  -1   50.79   13.80
   0 -14   1   82.89   20.50
   0 -14   1   65.69   41.90
   0 -14  -1   62.09   23.60
   0  14  -1   80.79   28.00
   0  14   1   91.39   27.90
   0  14   1  115.19   46.00
   0  14  -1   53.49   35.80
   0  14  -1   52.89   17.90
   0  14   1   91.09   27.10
   0  14  -1   52.79   36.20
   0  14  -1   80.89   28.60
   0  14   1  122.99   45.90
   1 -14   1  103.19   44.80
  -1 -14  -1   48.20   20.60
  -1 -14  -1   48.20   21.10
   1 -14   1   96.89   21.80
  -1 -14  -1  118.29   24.90
  -1  14  -1  104.99   33.60
   1  14   1   64.29   23.90
  -1  14  -1   91.69   22.30
  -1  14  -1  105.09   32.80
   1  14   1   57.79   45.10
   1  14   1   62.89   45.00
   1  14   1   63.89   23.30
  -1  14  -1   58.99   28.50
  -1  14  -1   58.39   28.80
   2 -14   1   57.49   33.60
  -2 -14  -1   90.19   33.70
  -2 -14  -1   68.59   24.20
  -2 -14  -1   89.89   32.90
  -2  14  -1   24.70   36.50
  -2  14  -1   24.90   36.00
  -2  14  -1   70.09   24.60
   2  14   1   93.39   31.90
  -2  14  -1   73.69   21.60
  -2  14  -1   69.99   25.20
   2  14   1   92.89   31.10
   2  14   1   85.59   49.20
  -3 -14  -1  231.08   48.10
  -3 -14  -1  231.18   49.20
  -3 -14  -1  283.17   47.90
  -3  14  -1  401.36   80.89
  -3  14  -1  284.37   48.30
  -3  14  -1  405.66   79.89
   3  14   1  385.06   63.09
   3  14   1  184.48   71.19
  -3  14  -1  252.27   42.20
  -3  14  -1  284.57   49.30
   3  14   1  382.96   61.49
  -4 -14  -1  156.18   43.60
  -4 -14  -1  117.59   31.90
  -4 -14  -1  156.28   44.70
  -4  14  -1  113.99   46.60
   4  14   1  149.59   48.60
  -4  14  -1  147.99   36.30
   4  14   1  150.48   49.90
   4  14   1  106.59   64.29
  -4  14  -1  115.19   46.10
  -4  14  -1  147.89   35.50
  -4  14  -1  137.69   31.40
  -5 -14  -1  149.69   42.50
   5 -14   1   25.30   46.80
  -5 -14  -1   98.39   39.00
  -5 -14  -1   98.49   39.90
  -5  14  -1  150.48   51.89
  -5  14  -1   80.09   30.10
  -5  14  -1  198.38   37.20
  -5  14  -1  148.69   52.49
  -5  14  -1  198.38   38.00
   5  14   1  152.78   45.60
   5  14   1  151.78   44.30
   5  14   1   50.99   63.99
  -6 -14  -1   64.69   34.10
  -6 -14  -1   64.69   33.30
  -6 -14  -1    3.10   21.30
  -6  14  -1   74.89   27.20
  -6  14  -1   32.20   30.90
   6  14   1   15.40   24.50
  -6  14  -1   74.89   26.60
  -6  14  -1   31.70   31.20
   6  14   1   62.29   66.09
  -6  14  -1   74.49   31.60
   6  14   1   15.60   25.20
  -7 -14  -1   75.89   35.10
  -7 -14  -1   75.89   34.30
  -7 -14  -1   53.89   32.30
   7  14   1   17.60   42.60
  -7  14  -1   77.69   33.60
   7  14   1   17.50   41.30
  -7  14  -1   81.99   27.40
  -7  14  -1   72.89   35.90
  -7  14  -1   71.99   36.30
   7  14   1   39.20   65.29
  -7  14  -1   82.19   28.00
  -8 -14  -1   57.89   36.70
  -8 -14  -1    7.50   37.30
  -8 -14  -1    7.40   36.40
  -8  14  -1   52.49   41.30
  -8  14  -1   32.70   22.80
  -8  14  -1   32.20   22.20
  -8  14  -1   39.70   30.60
   8  14   1  -55.49   64.29
  -8  14  -1   40.00   30.20
  -8 -15   1   35.30   32.40
  -8 -15   1   26.90   33.20
  -8 -15   1   35.20   31.60
   8  15  -1  134.19   85.59
  -8  15   1   67.59   20.30
  -8  15   1   46.90   26.00
  -8  15   1   20.80   21.20
   8  15  -1  119.69   85.89
  -8  15   1   46.30   26.20
  -8  15   1   67.19   19.70
  -7 -15   1   72.09   36.70
  -7 -15   1   49.70   31.90
  -7 -15   1   72.09   37.60
  -7  15   1   18.50   32.00
   7  15  -1   97.29   71.09
   7  15  -1  160.38   49.20
   7  15  -1  160.48   47.90
  -7  15   1   59.19   23.10
  -7  15   1   59.49   23.70
   7  15  -1   91.29   70.89
  -7  15   1   18.80   31.70
  -7  15   1   92.89   25.50
  -6 -15   1  218.38   50.19
  -6 -15   1  174.78   45.10
  -6 -15   1  218.48   51.39
   6  15  -1  199.08   75.89
   6  15  -1  190.38   76.09
  -6  15   1  104.69   29.70
   6  15  -1  129.59   42.70
  -6  15   1  104.39   29.00
   6  15  -1  129.19   41.50
  -6  15   1  148.69   25.50
  -6  15   1   88.89   35.50
  -6  15   1   87.79   35.90
  -5 -15   1  220.18   48.10
  -5 -15   1  220.48   49.30
  -5 -15   1  159.18   44.80
   5  15  -1  143.79   48.10
   5  15  -1  143.39   46.90
  -5  15   1  154.18   32.00
   5  15  -1  119.29   69.19
  -5  15   1  140.69   22.70
  -5  15   1  154.58   32.80
  -5  15   1  158.58   42.80
  -5  15   1  160.28   42.30
   5  15  -1  131.99   68.99
  -4 -15   1  111.29   36.10
  -4 -15   1   84.49   53.69
  -4 -15   1  131.89   39.20
  -4 -15   1  132.09   40.10
  -4  15   1  120.29   47.90
   4  15  -1   90.39   35.10
   4  15  -1  114.69   62.09
   4  15  -1   90.69   36.10
  -4  15   1  119.09   48.50
  -4  15   1   88.69   13.10
  -4  15   1  121.09   29.70
  -4  15   1  121.49   30.40
   4  15  -1  128.09   61.89
  -3 -15   1  254.37   51.69
  -3 -15   1  321.57   52.09
  -3 -15   1  254.77   52.89
  -3 -15   1  348.07   94.79
  -3  15   1  233.68   63.89
  -3  15   1  307.07   53.99
   3  15  -1  247.58   71.89
  -3  15   1  306.07   52.69
  -3  15   1  230.78   64.59
   3  15  -1  245.18   72.39
   3  15  -1  472.25   73.59
   3  15  -1  473.65   75.49
  -2 -15   1  249.08   85.39
  -2  15   1  130.59   54.29
   2  15  -1  122.19   59.69
  -2  15   1  132.59   53.89
   2  15  -1  116.59   60.19
   2  15  -1  134.89   30.80
  -2  15   1  176.78   37.20
   2  15  -1  191.28   44.80
   2  15  -1  191.78   45.90
  -2  15   1  177.48   38.20
   1 -15  -1  231.48   47.60
   1 -15  -1  231.08   46.50
  -1 -15   1  250.17   74.69
  -1 -15   1  189.38   37.20
   1  15  -1  164.98   34.30
   1  15  -1  205.08   45.00
  -1  15   1  142.39   39.40
   1  15  -1  254.07   70.79
   1  15  -1  204.58   43.90
  -1  15   1  153.78   55.39
  -1  15   1  142.89   40.40
  -1  15   1  157.28   55.09
   1  15  -1  250.57   71.49
   0 -15  -1  244.28   28.00
   0 -15  -1  233.28   48.10
   0 -15   1  281.67   39.40
   0 -15  -1  233.68   49.10
   0 -15   1  304.77   83.99
   0  15   1  305.37   77.29
   0  15   1  340.57   58.49
   0  15  -1  331.97   58.99
   0  15  -1  332.47   60.39
   0  15   1  297.07   77.49
   0  15  -1  406.76   92.79
   0  15  -1  401.66   93.69
   0  15  -1  334.77   38.50
   0  15   1  339.17   56.99
  -1 -15  -1  308.67   55.69
  -1 -15  -1  309.07   56.99
  -1 -15  -1  242.08   36.40
   1 -15   1  169.48   62.19
  -1  15  -1  249.18   74.69
   1  15   1  369.76   64.19
   1  15   1  229.68   70.79
  -1  15  -1  240.28   37.80
  -1  15  -1  246.38   75.49
   1  15   1  371.46   65.99
  -1  15  -1  274.47   53.99
   1  15   1  222.38   70.89
  -1  15  -1  274.17   52.79
  -2 -15  -1   63.69   29.70
  -2 -15  -1   63.79   30.50
   2 -15   1   50.89   51.19
  -2  15  -1   60.99   28.00
   2  15   1   56.99   34.10
   2  15   1   57.69   35.10
  -2  15  -1   17.20   42.20
  -2  15  -1   50.69   19.90
  -2  15  -1   60.99   27.30
  -2  15  -1   17.30   41.70
   2  15   1   68.59   53.59
  -3 -15  -1   49.40   22.60
  -3 -15  -1   59.49   24.90
  -3 -15  -1   49.50   23.10
  -3  15  -1   87.09   32.50
  -3  15  -1   83.39   23.40
   3  15   1   82.69   36.40
  -3  15  -1   32.60   31.60
   3  15   1   82.29   35.40
   3  15   1  136.49   63.39
  -3  15  -1   87.19   33.20
  -3  15  -1   32.90   31.20
  -4 -15  -1  -15.90   16.40
  -4 -15  -1  -33.10   14.10
  -4 -15  -1  -33.10   13.80
  -4  15  -1    1.10   18.20
  -4  15  -1  -52.29   26.10
   4  15   1   -6.40   27.00
  -4  15  -1   -8.80   15.20
   4  15   1  -17.80   37.40
  -4  15  -1  -52.79   25.70
   4  15   1   -6.20   26.20
  -4  15  -1    0.90   17.80
  -5 -15  -1   12.50   28.90
  -5 -15  -1    9.40   22.70
  -5 -15  -1   12.50   28.30
   5  15   1   -9.30   19.70
   5  15   1   -9.40   20.30
  -5  15  -1  -13.70   16.90
  -5  15  -1  -13.70   16.50
  -5  15  -1  -19.40   18.00
  -5  15  -1    6.10   30.10
   5  15   1  -18.80   59.99
  -5  15  -1    5.90   30.40
  -6 -15  -1   -4.80   24.60
  -6 -15  -1   -5.20   24.00
  -6 -15  -1  -38.30   19.00
   6  15   1   -2.50   23.50
  -6  15  -1  -40.60   32.50
  -6  15  -1  -37.70   22.70
  -6  15  -1  -18.00   18.20
  -6  15  -1  -18.00   18.60
  -6  15  -1  -40.90   32.20
   6  15   1   -2.50   22.80
   6  15   1  -60.09   58.79
  -7 -15  -1   -3.60   27.00
  -7 -15  -1   -7.20   30.40
  -7 -15  -1   -7.20   29.60
   7  15   1  -46.60   41.50
  -7  15  -1  -13.40   21.40
   7  15   1  -46.90   42.80
  -7  15  -1    9.00   29.50
   7  15   1  -40.10   72.99
  -7  15  -1   10.90   33.50
  -7  15  -1  -13.60   20.90
  -7  15  -1   11.00   33.20
  -8 -15  -1  -30.40   33.60
  -8 -15  -1   17.50   33.80
  -8 -15  -1  -30.60   34.40
   8  15   1    2.60   76.09
  -8  15  -1   -9.50   22.40
  -8  15  -1   61.09   37.50
  -8  15  -1   37.60   33.30
  -8  15  -1   -9.50   21.90
  -8  15  -1   37.30   33.70
  -8 -16   1   46.20   37.90
  -8 -16   1   46.10   37.00
  -8 -16   1  -25.20   32.00
  -8  16   1   32.10   27.60
  -8  16   1   14.30   18.70
  -8  16   1   31.70   27.90
   8  16  -1   14.90   86.49
  -8  16   1   14.20   18.20
  -8  16   1   34.20   19.80
   8  16  -1    2.40   86.79
  -8  16   1   22.10   25.00
  -7 -16   1    5.80   30.90
  -7 -16   1   34.80   31.90
  -7 -16   1   34.70   31.10
   7  16  -1   44.50   30.60
   7  16  -1  147.59   75.69
  -7  16   1  -23.70   18.50
  -7  16   1  -49.50   25.90
  -7  16   1  -48.90   26.20
   7  16  -1  133.99   75.89
  -7  16   1  -23.50   18.00
   7  16  -1   44.20   29.70
  -7  16   1    3.70   13.90
  -6 -16   1   40.00   32.80
  -6 -16   1   40.00   32.00
  -6 -16   1   39.10   29.70
   6  16  -1   34.50   37.50
  -6  16   1   29.10   14.90
  -6  16   1   15.70   32.30
   6  16  -1   14.80   61.39
   6  16  -1   22.70   61.09
  -6  16   1   -2.90   21.60
  -6  16   1   15.70   31.90
  -6  16   1   -2.90   21.00
  -6  16   1   35.30   12.00
   6  16  -1   34.60   38.60
  -5 -16   1   27.40   25.90
  -5 -16   1   41.30   26.60
  -5 -16   1   27.50   26.50
  -5  16   1   33.70   22.60
   5  16  -1    8.70   21.80
   5  16  -1  101.99   61.99
   5  16  -1  103.99   61.69
   5  16  -1    8.70   22.40
  -5  16   1  -22.90   27.10
  -5  16   1  -22.60   27.40
  -5  16   1   33.40   23.20
  -5  16   1   26.70    8.90
  -4 -16   1  -12.70   20.00
  -4 -16   1   57.79   28.20
  -4 -16   1   57.89   28.90
   4  16  -1   14.40   30.60
  -4  16   1   25.40   17.90
   4  16  -1   82.39   45.00
  -4  16   1   25.50   18.40
  -4  16   1   17.80   36.40
   4  16  -1   14.50   31.40
   4  16  -1   89.59   44.70
  -4  16   1   17.60   35.90
  -3 -16   1   24.00   22.40
  -3 -16   1   11.50   20.90
  -3 -16   1   11.50   20.40
  -3 -16   1  -51.39   40.60
   3  16  -1   33.70   43.00
  -3  16   1  -32.60   31.70
  -3  16   1  -32.80   31.40
   3  16  -1   11.20   22.20
   3  16  -1   35.60   42.60
  -3  16   1   14.40   21.20
  -3  16   1   14.50   21.80
   3  16  -1   11.20   21.70
  -2 -16   1  154.88   59.29
  -2 -16   1   31.60   23.10
  -2  16   1   57.39   29.30
  -2  16   1   69.09   49.70
   2  16  -1   49.70   38.90
  -2  16   1   70.09   49.20
  -2  16   1   57.09   28.50
   2  16  -1   43.00   25.20
   2  16  -1   30.30   16.00
   2  16  -1   48.90   39.20
   2  16  -1   42.90   24.60
  -1 -16   1    9.50   43.30
  -1 -16   1   59.09   22.70
   1  16  -1   32.00   22.60
   1  16  -1   75.69   49.10
  -1  16   1   61.19   31.70
  -1  16   1   60.39   48.50
   1  16  -1   76.69   48.60
  -1  16   1   60.89   30.80
  -1  16   1   61.99   48.80
   1  16  -1   31.90   22.00
   1  16  -1   62.29   19.70
   0 -16   1    8.00   14.40
   0 -16  -1   -2.70    8.30
   0 -16  -1    5.00   18.20
   0 -16  -1    5.00   18.60
   0 -16   1  -28.70   37.40
   0  16   1   52.29   37.00
   0  16   1   10.90   19.20
   0  16   1   10.80   18.70
   0  16  -1   -6.60   36.40
   0  16  -1   19.20   17.00
   0  16  -1   19.20   17.40
   0  16  -1   -6.50   36.80
   0  16   1   51.49   36.90
   0  16  -1   24.50   16.80
  -1 -16  -1   71.09   28.10
   1 -16   1   57.59   42.50
  -1 -16  -1  106.39   25.10
  -1 -16  -1   71.29   28.80
   1  16   1  128.19   59.69
  -1  16  -1   88.29   29.50
  -1  16  -1  128.29   48.70
  -1  16  -1   88.19   28.80
  -1  16  -1   91.19   25.30
  -1  16  -1  126.89   49.30
   1  16   1  110.09   34.00
   1  16   1  128.89   59.79
   1  16   1  110.59   34.90
  -2 -16  -1   77.09   26.10
  -2 -16  -1   79.29   28.60
   2 -16   1   39.70   59.39
  -2 -16  -1   79.49   29.30
  -2  16  -1   92.59   56.39
  -2  16  -1   87.99   29.90
   2  16   1  161.68   46.30
  -2  16  -1   49.20   21.10
  -2  16  -1   91.69   57.19
   2  16   1   39.20   57.19
  -2  16  -1   87.79   29.20
   2  16   1   41.80   57.09
   2  16   1  160.88   45.00
  -3 -16  -1   94.29   33.30
  -3 -16  -1  117.19   33.20
  -3 -16  -1   94.29   34.10
  -3  16  -1   90.69   29.40
  -3  16  -1  205.08   61.59
  -3  16  -1  207.28   60.79
   3  16   1  114.89   37.70
  -3  16  -1  133.79   30.40
   3  16   1  102.09   62.09
   3  16   1  115.29   38.80
   3  16   1  103.09   62.09
  -3  16  -1   90.59   28.70
  -4 -16  -1  114.19   34.10
  -4 -16  -1   81.69   31.50
  -4 -16  -1   81.79   32.30
   4  16   1  154.68   48.40
   4  16   1  155.68   49.90
  -4  16  -1   64.59   27.90
  -4  16  -1  174.28   60.09
  -4  16  -1   59.89   24.60
  -4  16  -1   64.49   27.30
   4  16   1  106.69   51.59
  -4  16  -1  176.18   59.39
  -5 -16  -1   91.79   35.90
  -5 -16  -1   91.79   35.00
  -5 -16  -1   32.80   30.20
   5  16   1  206.38  100.19
  -5  16  -1   65.29   32.60
   5  16   1    7.60   32.50
  -5  16  -1  -14.20   34.20
   5  16   1    7.50   31.50
  -5  16  -1  -14.40   33.90
  -5  16  -1   65.39   33.40
  -5  16  -1   72.39   25.70
  -6 -16  -1   31.00   31.40
  -6 -16  -1   88.79   39.40
  -6 -16  -1   88.79   40.30
  -6  16  -1   84.99   35.80
   6  16   1   64.99   48.50
   6  16   1   65.49   49.99
  -6  16  -1   84.99   35.00
   6  16   1   84.59   78.99
  -6  16  -1   77.99   39.90
  -6  16  -1   76.99   40.30
  -6  16  -1   50.49   25.60
  -7 -16  -1    8.50   39.20
  -7 -16  -1   27.50   33.80
  -7 -16  -1    8.50   38.30
  -7  16  -1   50.89   28.40
  -7  16  -1    3.90   31.50
  -7  16  -1   -3.90   35.10
   7  16   1  -37.80   82.09
  -7  16  -1   -3.80   35.40
  -7  16  -1   50.89   29.10
  -7 -17   1   12.70   25.00
  -7 -17   1   12.80   24.40
  -7 -17   1  127.49   38.40
   7  17  -1    8.90   53.39
  -7  17   1   24.70   25.10
  -7  17   1   37.90   38.10
  -7  17   1   45.60   15.90
  -7  17   1   43.80   17.90
   7  17  -1    4.30   53.69
  -7  17   1   24.50   24.40
  -7  17   1   37.50   38.50
  -6 -17   1   88.19   39.30
  -6 -17   1  117.29   47.70
  -6 -17   1  117.29   48.80
  -6  17   1   30.70   24.90
  -6  17   1   30.80   25.60
   6  17  -1  201.48   89.59
  -6  17   1   80.69   42.40
  -6  17   1   79.49   42.70
   6  17  -1  208.08   89.29
   6  17  -1   79.59   56.39
   6  17  -1   79.09   54.79
  -6  17   1   54.49   10.80
  -6  17   1   61.09   11.80
  -5 -17   1  155.38   43.20
  -5 -17   1  155.08   42.10
  -5 -17   1   90.39   35.90
   5  17  -1   62.09   43.20
   5  17  -1   62.49   44.40
   5  17  -1   93.69   63.29
  -5  17   1   63.39   25.50
  -5  17   1   63.19   24.90
  -5  17   1   96.49   51.19
  -5  17   1   97.49   50.59
   5  17  -1   95.19   62.89
  -4 -17   1  115.39   38.00
  -4 -17   1  102.39   45.40
  -4 -17   1  102.69   44.30
  -4  17   1   78.49   53.79
   4  17  -1  133.79   44.90
  -4  17   1  120.09   38.80
   4  17  -1   97.79   69.49
  -4  17   1   77.29   54.49
  -4  17   1  119.39   37.80
   4  17  -1  134.39   46.10
   4  17  -1  108.09   69.09
  -3 -17   1  115.39   40.70
  -3 -17   1   49.10   60.89
   3  17  -1   92.69   31.00
  -3  17   1  103.19   33.70
  -3  17   1  103.19   32.90
   3  17  -1  176.48   78.39
   3  17  -1   92.29   30.20
   3  17  -1  179.18   77.79
  -3  17   1  134.69   62.49
  -3  17   1  133.09   63.19
  -2 -17   1  142.39   83.49
  -2 -17   1   21.40   24.60
  -2  17   1  138.49   54.19
  -2  17   1   78.79   34.70
  -2  17   1  140.29   53.59
   2  17  -1  104.49   57.79
   2  17  -1  105.99   57.29
  -2  17   1   78.49   33.80
  -1 -17   1   72.39   24.00
  -1 -17   1  277.77   88.79
  -1  17   1   63.39   42.70
   1  17  -1   88.49   24.10
   1  17  -1   59.19   42.40
  -1  17   1   54.59   28.30
   1  17  -1  115.89   60.99
   1  17  -1  114.39   61.59
  -1  17   1   62.39   43.10
   1  17  -1   59.09   43.40
  -1  17   1   54.39   27.50
   0 -17   1    1.70   13.10
   0 -17  -1  -10.50   21.00
   0 -17  -1  -10.50   21.50
   0 -17  -1    1.00    8.80
   0 -17   1  -49.20   38.10
   0  17  -1   12.70   17.60
   0  17  -1    1.20   25.50
   0  17  -1   83.09   47.50
   0  17   1   54.69   30.70
   0  17  -1    0.80   26.10
   0  17   1   36.90   44.60
   0  17  -1   82.89   48.00
   0  17   1   54.49   29.90
   0  17   1   32.00   44.90
  -1 -17  -1   23.10   20.70
  -1 -17  -1   35.10   15.30
  -1 -17  -1   23.10   21.20
  -1  17  -1   39.30   25.30
   1  17   1  -19.10   36.80
  -1  17  -1   31.60   17.10
  -1  17  -1   39.20   24.70
   1  17   1  -20.70   37.00
   1  17   1   80.79   34.80
   1  17   1   80.39   33.80
  -1  17  -1  -14.80   33.10
  -1  17  -1  -14.70   33.50
  -2 -17  -1   28.70   24.20
  -2 -17  -1   28.00   27.10
  -2 -17  -1   28.10   27.70
   2  17   1   56.49   58.29
  -2  17  -1  -20.50   27.50
   2  17   1   85.09   30.40
   2  17   1   85.49   31.20
   2  17   1   41.70   58.39
  -2  17  -1   62.59   22.00
  -2  17  -1  -20.50   26.90
  -2  17  -1   76.09   42.30
  -2  17  -1   76.89   41.80
  -3 -17  -1   -5.40   26.80
  -3 -17  -1   -5.60   26.20
  -3 -17  -1  -46.50   18.50
   3  17   1  -12.50   37.20
   3  17   1   45.90   29.60
   3  17   1   -9.60   37.30
  -3  17  -1   11.30   17.20
  -3  17  -1   -8.20   46.20
  -3  17  -1    3.70   26.20
   3  17   1   45.90   30.50
  -3  17  -1    3.70   25.50
  -3  17  -1   -8.40   46.70
  -4 -17  -1  -26.10   21.90
  -4 -17  -1   -3.90   22.70
  -4 -17  -1  -26.10   21.40
  -4  17  -1  -15.90   18.40
   4  17   1   21.60   29.20
   4  17   1   21.50   28.30
   4  17   1   42.70   56.69
  -4  17  -1  -53.29   33.50
  -4  17  -1  -10.80   24.70
  -4  17  -1  -52.89   33.90
   4  17   1   43.70   56.69
  -4  17  -1  -10.80   24.10
  -5 -17  -1  -12.90   32.70
  -5 -17  -1    9.30   26.80
  -5 -17  -1  -12.80   33.60
   5  17   1  -24.50   71.59
  -5  17  -1   -2.10   25.90
  -5  17  -1   -2.10   25.30
  -5  17  -1  -20.70   21.90
  -5  17  -1  -35.00   45.70
  -5  17  -1  -35.40   45.20
  -6 -17  -1  -35.70   26.70
  -6 -17  -1    6.00   38.30
  -6 -17  -1    5.90   37.40
  -6  17  -1   27.70   31.00
  -6  17  -1  -47.20   39.50
   6  17   1   60.29   50.29
  -6  17  -1  -23.40   25.60
   6  17   1   59.79   48.80
  -6  17  -1   27.70   30.20
  -6  17  -1  -46.70   39.90
   6  17   1  -64.39   64.29
  -5 -18   1   -7.90   25.60
  -5 -18   1  -55.99   30.30
  -5 -18   1   -7.90   26.20
   5  18  -1  -45.40   28.50
  -5  18   1  -22.50   18.50
  -5  18   1  -22.30   18.00
  -5  18   1  -37.20   43.60
   5  18  -1  -18.40   61.59
   5  18  -1  -45.60   29.30
   5  18  -1  -13.00   61.19
  -5  18   1  -36.80   44.20
  -4 -18   1   34.30   28.00
   4  18  -1  -47.10   36.10
   4  18  -1  -47.10   35.10
  -4  18   1   81.59   47.60
  -4  18   1   82.39   47.00
  -4  18   1  -23.70   23.70
  -4  18   1  -23.90   24.30
   4  18  -1   50.49   74.89
   4  18  -1   43.30   75.49
  -3 -18   1   62.59   27.50
   3  18  -1    3.30   65.39
  -3  18   1   37.60   46.20
   3  18  -1   52.19   41.40
  -3  18   1  -11.10   24.30
   3  18  -1    4.70   65.99
   3  18  -1   52.29   42.50
  -3  18   1  -11.00   23.70
  -3  18   1   38.00   45.70
  -2 -18   1  -21.70   24.30
   2  18  -1   45.50   37.70
   2  18  -1   10.60   68.79
  -2  18   1  -29.40   24.00
  -2  18   1  155.48   58.29
   2  18  -1   44.90   36.70
   2  18  -1   10.70   69.49
  -2  18   1  153.68   58.89
  -2  18   1  -29.60   24.70
  -1 -18   1   31.60   19.50
   1  18  -1   72.99   38.60
  -1  18   1   28.60   30.00
  -1  18   1   33.20   42.80
  -1  18   1   28.30   30.80
  -1  18   1   33.70   42.50
   1  18  -1    9.20   17.40
   1  18  -1  112.89   52.89
   1  18  -1  111.49   53.39
   1  18  -1   73.89   39.60
   0 -18   1   31.80   18.50
   0  18   1   40.50   26.70
   0  18   1   40.30   26.00
   0  18   1   46.60   52.99
   0  18  -1   28.20   34.40
   0  18  -1  -20.00   48.20
   0  18   1   43.40   53.39
   0  18  -1   56.09   18.20
   0  18  -1  -19.70   48.70
   0  18  -1   28.10   33.50
  -1 -18  -1   86.69   19.00
  -1 -18  -1   12.20   22.80
  -1 -18  -1   12.20   22.20
  -1  18  -1   81.69   23.60
  -1  18  -1   82.59   33.50
   1  18   1  160.68   75.79
  -1  18  -1  -41.20   53.69
  -1  18  -1  -40.80   54.39
  -1  18  -1   82.39   32.70
   1  18   1  160.58   76.19
   1  18   1   93.49   30.40
   1  18   1   94.29   31.30
  -2 -18  -1   40.00   37.90
  -2 -18  -1    5.20   20.70
  -2 -18  -1   40.00   37.00
   2  18   1   66.99   37.80
   2  18   1   22.10   67.59
  -2  18  -1   41.70   23.20
  -2  18  -1   49.20   57.29
   2  18   1   67.69   38.90
   2  18   1   23.70   67.39
  -2  18  -1    3.40   32.10
  -2  18  -1   48.70   57.99
  -2  18  -1    3.50   32.90
  -3 -18  -1   29.20   29.60
  -3 -18  -1   64.99   35.00
  -3 -18  -1   29.30   30.30
   3  18   1   37.70   43.60
   3  18   1 -144.29   63.89
  -3  18  -1   51.79   32.90
  -3  18  -1   21.00   48.10
   3  18   1   38.10   44.90
   3  18   1 -133.19   63.69
  -3  18  -1   59.59   22.40
  -3  18  -1   20.80   48.70
  -3  18  -1   51.89   33.70
  -4 -18  -1   12.90   26.50
  -4 -18  -1   12.90   25.90
  -4 -18  -1   94.99   35.90
  -4  18  -1   53.49   46.50
   4  18   1   48.30   55.99
   4  18   1  -54.49   49.50
  -4  18  -1    3.20   27.50
  -4  18  -1    8.10   21.20
  -4  18  -1    3.20   26.80
  -4  18  -1   52.89   47.00
   4  18   1   47.20   54.39
   4  18   1  -57.29   49.50
  -5 -18  -1   40.70   34.50
  -5 -18  -1   90.89   39.60
  -5 -18  -1   90.89   38.60
  -5  18  -1  -15.50   50.19
   5  18   1  -15.10   49.60
   5  18   1 -120.29   84.49
   5  18   1 -110.09   84.49
   5  18   1  -15.10   51.09
  -5  18  -1   58.39   36.60
  -5  18  -1   58.29   35.70
  -5  18  -1   36.50   27.00
  -5  18  -1  -15.20   50.79
  -4 -19   1   31.00   34.10
   4  19  -1   68.99   65.59
  -4  19   1   23.30   48.90
   4  19  -1   -2.60   37.90
  -4  19   1   -9.40   27.00
  -4  19   1   23.00   49.50
   4  19  -1   -2.40   36.90
  -4  19   1   -9.30   26.20
   4  19  -1   69.99   65.09
  -3 -19   1   56.89   35.70
  -3  19   1   36.40   52.19
   3  19  -1  -44.60   29.10
   3  19  -1  -44.70   29.90
  -3  19   1   36.80   52.89
   3  19  -1  182.88   67.89
  -3  19   1   25.40   32.20
  -3  19   1   25.30   31.30
   3  19  -1  180.28   68.49
  -2 -19   1    6.60   25.70
  -2  19   1   59.49   33.50
   2  19  -1   21.00   44.60
  -2  19   1   -5.70   48.80
   2  19  -1    7.20   27.60
  -2  19   1   59.19   32.60
  -2  19   1   -5.60   49.30
   2  19  -1    7.00   28.30
   2  19  -1   20.00   45.00
  -1 -19   1   35.00   21.10
  -1  19   1  -31.00   26.30
   1  19  -1   68.49   44.10
   1  19  -1   68.89   42.90
   1  19  -1   58.09   68.29
  -1  19   1   57.29   69.39
  -1  19   1  -30.70   25.60
  -1  19   1   56.49   69.99
   1  19  -1   58.69   67.59
   0  19  -1  -21.20   57.39
   0  19  -1   71.19   39.40
   0  19   1   -7.20   42.00
   0  19   1   -7.00   42.30
   0  19   1   19.10   34.00
   0  19   1   19.00   33.10
   0  19  -1   71.19   40.40
   0  19  -1    2.90   15.90
   0  19  -1  -21.00   58.09
  -1 -19  -1   14.30   13.10
  -1 -19  -1   -1.80   34.80
  -1 -19  -1   -1.70   33.90
   1  19   1   79.09   42.60
  -1  19  -1    0.50   16.80
  -1  19  -1   51.59   53.09
   1  19   1   79.59   43.90
  -1  19  -1    9.10   22.80
   1  19   1  -63.49   57.29
  -1  19  -1    9.10   23.40
   1  19   1  -68.69   57.49
  -1  19  -1   51.09   53.79
  -2 -19  -1   25.70   34.90
  -2 -19  -1    3.10   20.60
  -2 -19  -1   25.60   34.00
   2  19   1   -3.30   67.19
   2  19   1   -2.00   67.39
  -2  19  -1   44.00   33.70
   2  19   1   71.19   32.30
  -2  19  -1   -6.80   54.79
  -2  19  -1  -14.20   15.50
  -2  19  -1   -6.60   55.49
   2  19   1   71.19   31.40
  -2  19  -1   44.10   34.50
  -3 -19  -1   15.10   29.60
  -3 -19  -1    5.70   27.50
  -3 -19  -1    5.60   26.80
   3  19   1   -3.00   30.10
   3  19   1  -49.99   73.09
   3  19   1   -2.70   31.00
   3  19   1  -62.49   73.39
  -3  19  -1   20.20   58.69
  -3  19  -1  -18.70   29.90
  -3  19  -1  -18.70   30.60
  -3  19  -1   21.00   57.99
  -3  19  -1   14.20   18.90
 -13   0   2   -8.60   15.30
  13   0  -2   41.10   37.70
 -13   0   2   -8.70   14.90
 -13   0   2  -68.49   30.60
  13   0  -2   34.60   37.50
 -12   0   2   -7.70   12.40
 -12   0   2   29.30   24.20
 -12   0   2   -7.70   12.10
  12   0  -2  -32.00   29.30
  12   0  -2  -39.10   29.40
  11   0  -2  -13.10   28.60
  11   0  -2   56.29   29.10
 -11   0   2   43.60   22.70
  11   0  -2   56.49   28.60
 -11   0   2   81.59   21.10
 -11   0   2   81.49   20.60
  10   0  -2  195.58   43.90
 -10   0   2  212.88   45.70
 -10   0   2  187.18   29.30
 -10   0   2  187.18   30.00
  10   0  -2  169.98   33.20
  10   0  -2  170.18   32.60
  -9   0   2  282.77   32.30
  -9   0   2  378.66   57.49
   9   0  -2  335.07   36.30
   9   0  -2  335.67   37.10
   9   0  -2  332.37   53.69
  -9   0   2  282.57   31.70
  -8   0   2  424.76   37.80
  -8   0   2  424.96   38.40
   8   0  -2  434.26   59.19
   8   0  -2  420.16   39.50
   8   0  -2  422.26   40.20
  -8   0   2  407.16   59.49
   7   0  -2  536.65   43.90
  -7   0   2  555.44   43.80
   7   0  -2  560.74   59.09
  -7   0   2  525.85   56.49
   7   0  -2  540.95   44.70
  -7   0   2  555.74   44.40
  -6   0   2 1107.79   75.29
  -6   0   2 1107.19   74.79
   6   0  -2 1175.28   90.79
   6   0  -2 1160.88   75.29
   6   0  -2 1169.18   75.99
  -6   0   2 1243.58   91.89
   5   0  -2  436.86   44.80
   5   0  -2  429.76   44.90
   5   0  -2  500.85   35.20
   5   0  -2  502.75   35.70
  -5   0   2  433.46   34.90
  -5   0   2  432.96   34.50
  -5   0   2  431.26   44.10
  -4   0   2 1358.06   97.19
  -4   0   2 1480.55   98.79
   4   0  -2 1691.33  100.79
   4   0  -2 1667.73  101.19
   4   0  -2 1435.96   97.89
   4   0  -2 1362.76   87.49
   4   0  -2 1363.46   87.89
   3   0  -2 1623.54   96.69
  -3   0   2 1626.44  106.59
  -3   0   2 1694.33  105.39
  -3   0   2 1655.93  106.49
   3   0  -2 1625.34   97.09
   3   0  -2 1720.43  105.49
   3   0  -2 1611.54  106.89
   3   0  -2 1628.54  106.49
  -2   0   2  451.95   39.90
   2   0  -2  416.66   34.40
  -2   0   2  447.06   40.20
   2   0  -2  428.66   40.30
  -2   0   2  351.76   32.50
   2   0  -2  423.36   40.60
  -1   0   2  214.68   32.50
  -1   0   2  217.58   32.20
   1   0  -2  196.18   19.50
  -1   0   2  193.58   19.80
   0   0   2 1327.37   84.09
   0   0   2 1221.18   94.99
   0   0  -2 1300.77   83.79
   0   0  -2 1596.04  101.49
   0   0   2 1234.98   94.59
   0   0  -2 1609.14  100.79
   1   0   2 1259.27   90.29
   1   0   2 1248.48   90.89
  -2   0  -2   18.20   10.40
  -2   0  -2   18.20   10.20
   3   0   2  235.68   37.80
  -3   0  -2  281.77   41.60
   3   0   2  237.08   37.20
  -3   0  -2  280.97   40.70
  -4   0  -2   14.10   11.20
   4   0   2    8.50    8.60
   4   0   2    8.60    8.50
  -4   0  -2   14.10   10.80
   5   0   2  244.88   39.30
   5   0   2  243.38   39.90
  -6   0  -2  296.77   45.10
   6   0   2  171.68   38.10
   6   0   2  172.88   37.50
  -6   0  -2  294.27   43.80
   7   0   2   35.80   18.30
  -7   0  -2   46.20   19.30
  -7   0  -2   46.50   19.90
   7   0   2   35.60   18.60
  -8   0  -2   33.00   18.40
   8   0   2   17.50   16.00
   8   0   2   17.50   16.30
  -8   0  -2   32.80   17.90
  -9   0  -2  128.29   29.10
  -9   0  -2  128.99   29.80
 -10   0  -2  174.68   36.90
 -10   0  -2  173.98   36.00
 -11   0  -2   46.90   21.20
  11   0   2  -19.10   32.40
 -11   0  -2   47.10   21.70
  13  -1  -2   29.50   37.70
 -13  -1   2   33.70   18.40
 -13  -1   2   -6.20   25.40
  13  -1  -2   29.90   37.40
 -13  -1   2   33.70   18.90
  13   1  -2   75.79   46.60
 -13   1   2   -3.60   25.10
  13   1  -2   77.09   46.40
  12  -1  -2   44.30   30.40
 -12  -1   2   33.60   14.10
  12  -1  -2  -34.50   19.30
  12  -1  -2   48.10   30.50
 -12  -1   2   33.60   13.80
 -12  -1   2    7.40   29.70
  12  -1  -2  -34.80   19.00
 -12   1   2   10.00   12.40
 -12   1   2  -35.10   22.00
  12   1  -2    0.00   39.10
 -12   1   2   10.00   12.70
  12   1  -2    5.10   39.10
 -11  -1   2   30.80   14.90
  11  -1  -2    7.10   17.30
  11  -1  -2  -47.70   23.00
 -11  -1   2   29.00   18.90
 -11  -1   2   30.80   15.30
  11  -1  -2    7.10   17.60
  11  -1  -2  -46.50   23.00
 -11   1   2   20.60    9.40
 -11   1   2   34.70   25.40
  11   1  -2    8.60   30.40
 -11   1   2   20.60    9.20
  10  -1  -2   15.30   23.70
 -10  -1   2   34.20   23.20
  10  -1  -2   38.30   15.90
 -10  -1   2   19.10   12.00
 -10  -1   2   19.10   11.70
  10  -1  -2   38.50   15.60
 -10   1   2   36.20   11.40
  10   1  -2   29.60   15.00
 -10   1   2   11.90   14.00
  10   1  -2   69.09   35.80
 -10   1   2   36.30   11.70
  10   1  -2   29.60   15.30
  -9  -1   2   37.90   15.30
   9  -1  -2   40.90   15.10
   9  -1  -2   41.00   14.80
  -9  -1   2   37.90   15.00
   9  -1  -2   26.10   20.50
  -9  -1   2   48.70   23.10
   9   1  -2   43.70   19.00
  -9   1   2   25.30   11.40
   9   1  -2   41.70   23.40
   9   1  -2   43.50   18.40
  -9   1   2   57.29   22.60
  -9   1   2   25.20   11.10
  -8  -1   2   60.79   16.10
  -8  -1   2  130.49   31.60
   8  -1  -2  101.99   23.70
   8  -1  -2   57.89   14.60
   8  -1  -2   57.89   14.30
  -8  -1   2   60.79   16.40
  -8   1   2  106.39   32.60
   8   1  -2   70.39   25.80
   8   1  -2  104.89   21.50
  -8   1   2   83.89   15.90
  -8   1   2   83.79   15.60
   8   1  -2  105.69   22.20
  -7  -1   2   13.50    9.90
   7  -1  -2   17.00    7.90
   7  -1  -2   17.00    7.70
  -7  -1   2    0.10    7.50
   7  -1  -2   28.40   14.20
  -7  -1   2   13.50   10.20
  -7   1   2   19.10   11.30
  -7   1   2   24.90    8.10
  -7   1   2   24.90    7.90
   7   1  -2   22.30   10.50
   7   1  -2   22.50   10.80
   7   1  -2   16.40   13.80
   6  -1  -2  156.88   17.30
   6  -1  -2  178.08   28.90
  -6  -1   2  187.58   22.30
  -6  -1   2  187.48   21.90
   6  -1  -2  171.88   28.90
  -6  -1   2  140.39   29.10
   6  -1  -2  155.78   17.00
   6   1  -2  183.08   25.30
  -6   1   2  161.88   17.30
   6   1  -2  216.08   39.70
  -6   1   2  161.78   17.00
  -6   1   2  171.88   32.00
   6   1  -2  182.08   24.70
  -5  -1   2   21.10    6.90
   5  -1  -2   13.70    8.90
  -5  -1   2   19.40    9.00
  -5  -1   2   21.20    7.10
  -5  -1   2    7.90   10.90
   5  -1  -2   13.90    8.90
   5   1  -2   12.50    7.00
  -5   1   2   -0.50    6.90
   5   1  -2   12.40    6.80
   5   1  -2   22.40   14.10
   5   1  -2   24.80   14.10
   4  -1  -2 1271.67   81.59
  -4  -1   2 1206.38   80.39
   4  -1  -2 1273.77   73.99
   4  -1  -2 1275.47   74.29
  -4  -1   2 1350.26   96.09
  -4  -1   2 1172.88   87.79
  -4  -1   2 1207.78   80.89
   4  -1  -2 1285.17   81.29
   4   1  -2 1302.17   81.59
   4   1  -2 1349.47   95.59
  -4   1   2 1287.17   86.89
  -4   1   2 1206.08   80.19
   4   1  -2 1260.27   88.79
   4   1  -2 1325.77   95.89
   4   1  -2 1301.77   80.99
   3  -1  -2  363.36   31.30
  -3  -1   2  416.16   40.50
  -3  -1   2  346.67   34.00
   3  -1  -2  368.06   31.10
  -3  -1   2  406.36   40.60
   3  -1  -2  399.86   32.90
   3   1  -2  394.66   30.60
   3   1  -2  366.16   40.30
   3   1  -2  370.66   40.00
  -3   1   2  356.46   30.80
   3   1  -2  407.56   35.80
   3   1  -2  394.36   30.20
  -3   1   2  361.16   30.60
  -3   1   2  326.77   31.50
   2  -1  -2 9221.98  519.25
  -2  -1   2 9884.81  531.45
  -2  -1   2 9999.00  530.85
   2  -1  -2 9122.99  519.65
  -2  -1   2 9286.57  519.75
   2  -1  -2 9713.43  515.95
  -2   1   2 8635.94  518.65
  -2   1   2 8522.15  518.95
   2   1  -2 9458.95  520.05
  -2   1   2 9494.55  515.85
  -1  -1   2 1346.17   93.19
  -1  -1   2 1330.37   93.59
   1  -1  -2 1366.66   78.99
  -1  -1   2 1329.47   82.29
   1   1  -2 1124.99   90.49
  -1   1   2 1270.87   77.89
  -1   1   2 1265.57   86.39
  -1   1   2 1276.77   85.99
   1   1  -2 1139.29   90.09
   1   1  -2 1294.87   82.09
   0  -1  -2 6555.54  337.17
   0  -1   2 6019.60  354.86
   0  -1   2 6769.52  340.97
   0  -1   2 5940.21  355.36
   0   1   2 5530.05  342.97
   0   1  -2 5901.41  353.26
   0   1   2 5499.35  343.47
   0   1  -2 6271.97  340.27
   0   1  -2 5826.42  353.76
  -1   1  -2 4972.90  277.37
  -1   1  -2 4221.08  254.47
  -1   1  -2 5019.80  276.47
   1   1   2 4184.08  260.07
   1   1   2 4199.78  259.37
  -2  -1  -2 2026.40  117.29
   2  -1   2 1522.35  119.19
  -2  -1  -2 2016.50  115.89
   2  -1   2 1539.25  118.49
   2   1   2 1475.05  108.09
   2   1   2 1471.05  108.79
   3  -1   2  825.82   71.49
   3  -1   2  817.92   72.09
   3   1   2  758.42   64.29
   3   1   2  760.52   63.59
   4  -1   2  352.76   51.79
  -4  -1  -2  442.86   43.60
   4  -1   2  349.67   52.39
  -4  -1  -2  446.46   44.70
   4   1   2  348.57   40.40
   4   1   2  347.47   41.00
  -5  -1  -2  596.34   54.49
   5  -1   2  399.06   61.09
  -5  -1  -2  591.54   53.19
   5  -1   2  402.46   60.39
   5   1   2  457.45   50.39
   5   1   2  455.85   51.09
  -6  -1  -2  172.48   33.00
   6  -1   2   71.29   23.60
  -6  -1  -2  173.68   34.00
   6   1   2  107.49   28.50
   6   1   2  107.99   28.10
  -6   1  -2  186.38   36.70
  -6   1  -2  184.98   35.70
  -7  -1  -2  285.27   45.30
   7  -1   2  132.79   38.30
  -7  -1  -2  283.57   44.00
   7  -1   2  133.99   37.80
   7   1   2  211.18   40.10
   7   1   2  212.18   39.40
  -7   1  -2  276.67   44.40
  -7   1  -2  274.47   43.20
   8  -1   2   10.10   18.90
  -8  -1  -2   26.50   17.20
   8  -1   2   10.20   18.60
  -8  -1  -2   26.40   16.70
   8   1   2   11.60   17.50
  -8   1  -2   33.30   19.70
  -8   1  -2   33.00   19.10
   8   1   2   11.70   17.20
  -9  -1  -2  -17.30   13.40
  -9  -1  -2  -17.30   13.00
  -9   1  -2   21.70   16.90
  -9   1  -2   21.40   16.40
 -10  -1  -2   -3.50   13.90
 -10  -1  -2   -3.50   14.30
 -10   1  -2    1.90   16.40
  10   1   2   -5.70   24.50
 -10   1  -2    1.90   16.90
  11  -1   2   22.30   33.70
 -11  -1  -2  -31.40   17.90
 -11  -1  -2  -31.50   18.30
 -11   1  -2    4.40   15.60
  11   1   2  -23.20   32.00
 -11   1  -2    4.40   15.20
 -13  -2   2   63.09   24.90
 -13  -2   2   63.09   25.50
  13  -2  -2   74.99   25.60
  13  -2  -2   76.09   25.30
 -13  -2   2   40.70   36.10
 -13   2   2   30.90   37.30
  13   2  -2   20.30   51.49
  13   2  -2   14.90   51.29
 -12  -2   2   48.10   18.40
 -12  -2   2    1.00   16.90
  12  -2  -2    8.20   22.60
 -12  -2   2   48.10   18.00
  12  -2  -2    8.30   22.50
  12   2  -2   -3.20   39.80
 -12   2   2   44.70   21.30
  12   2  -2    3.90   39.80
  11  -2  -2   16.90   15.80
 -11  -2   2   42.30   15.50
  11  -2  -2    4.50   20.10
 -11  -2   2   42.20   15.90
  11  -2  -2   16.80   16.00
 -11  -2   2   23.60   24.60
  11  -2  -2    2.00   20.00
 -11   2   2   35.90   11.70
 -11   2   2   16.40   24.60
 -11   2   2   36.00   12.00
  11   2  -2   28.70   33.20
  10  -2  -2   67.59   19.50
 -10  -2   2   98.69   23.50
 -10  -2   2  123.59   36.00
  10  -2  -2   73.89   23.50
 -10  -2   2   98.69   23.00
  10  -2  -2   66.79   19.70
  10  -2  -2   71.89   23.60
 -10   2   2   82.89   28.10
  10   2  -2   91.19   25.10
  10   2  -2   90.79   24.40
 -10   2   2  110.79   17.70
 -10   2   2  110.89   18.10
  10   2  -2  141.89   45.70
  -9  -2   2  268.57   39.00
  -9  -2   2  249.38   51.09
   9  -2  -2  244.98   36.70
  -9  -2   2  268.37   38.20
   9  -2  -2  215.88   33.70
   9  -2  -2  217.88   33.30
   9   2  -2  320.57   44.20
  -9   2   2  322.37   53.39
  -9   2   2  293.97   26.20
  -9   2   2  293.77   25.70
   9   2  -2  327.27   61.39
   9   2  -2  323.17   45.50
   8  -2  -2  368.26   36.80
   8  -2  -2  371.16   36.40
  -8  -2   2  378.46   39.70
   8  -2  -2  339.37   39.20
  -8  -2   2  312.27   54.19
  -8  -2   2  378.26   39.10
  -8   2   2  441.26   32.20
  -8   2   2  403.86   56.89
   8   2  -2  476.75   73.99
   8   2  -2  408.46   42.40
  -8   2   2  440.96   31.80
   8   2  -2  411.76   43.40
   7  -2  -2  408.46   35.80
  -7  -2   2  466.05   43.30
  -7  -2   2  465.85   42.60
   7  -2  -2  463.05   40.00
   7  -2  -2  472.65   39.90
   7  -2  -2  405.66   36.10
  -7  -2   2  443.76   51.99
   7   2  -2  445.56   43.40
  -7   2   2  476.05   32.60
   7   2  -2  448.16   44.30
  -7   2   2  434.06   50.49
   7   2  -2  503.95   73.49
  -7   2   2  476.45   33.00
   6  -2  -2  334.37   29.30
  -6  -2   2  290.27   32.60
   6  -2  -2  326.57   25.70
   6  -2  -2  324.77   26.00
   6  -2  -2  339.37   29.20
  -6  -2   2  306.17   46.80
  -6  -2   2  290.17   32.00
   6   2  -2  380.36   59.39
   6   2  -2  346.57   34.40
  -6   2   2  410.06   41.50
   6   2  -2  345.17   33.70
  -5  -2   2  326.87   49.90
   5  -2  -2  287.37   19.80
  -5  -2   2  302.47   42.70
  -5  -2   2  295.57   30.60
  -5  -2   2  295.37   30.10
   5  -2  -2  298.27   22.20
   5  -2  -2  286.07   19.90
   5  -2  -2  301.57   22.10
  -5   2   2  319.07   34.30
   5   2  -2  289.37   49.70
   5   2  -2  404.56   40.00
   5   2  -2  281.17   49.70
   5   2  -2  283.27   29.70
   5   2  -2  283.77   30.20
  -4  -2   2 1004.40   84.39
  -4  -2   2 1030.00   69.69
  -4  -2   2  909.41   73.49
  -4  -2   2 1028.80   68.99
  -4   2   2  990.30   70.09
   4   2  -2 1000.00   68.59
   4   2  -2  942.01   73.79
   4   2  -2 1000.30   69.29
   3  -2  -2  172.68   12.60
  -3  -2   2  137.49   23.30
  -3  -2   2  147.99   29.50
   3  -2  -2  139.49   19.30
   3  -2  -2  172.48   12.50
  -3   2   2  127.99   14.60
  -3   2   2  103.29   17.50
  -3   2   2  126.49   14.70
   3   2  -2  147.69   24.00
   3   2  -2  127.39   19.60
   3   2  -2  127.29   19.20
   2  -2  -2  426.66   28.40
  -2  -2   2  378.76   42.50
  -2  -2   2  360.26   34.30
   2  -2  -2  427.76   28.70
   2  -2  -2  385.96   28.60
  -2  -2   2  384.26   42.20
  -2   2   2  335.77   28.00
  -2   2   2  338.97   30.00
   2   2  -2  343.37   40.60
  -2   2   2  341.57   29.80
   2   2  -2  339.57   41.00
   2   2  -2  325.57   33.40
  -1  -2   2  754.22   63.39
  -1  -2   2  664.43   49.20
   1  -2  -2  599.24   41.70
  -1  -2   2  762.12   62.79
   1   2  -2  609.04   58.99
   1   2  -2  602.34   59.49
  -1   2   2  603.04   45.50
  -1   2   2  604.14   45.10
   1   2  -2  697.83   49.10
  -1   2   2  643.04   41.40
   0  -2   2 2497.15  173.68
   0  -2   2 2467.65  174.28
   0  -2   2 2744.63  160.38
   0   2  -2 2662.53  176.08
   0   2  -2 2758.42  160.98
   0   2   2 2884.91  162.38
   0   2   2 2879.81  161.58
   0   2  -2 2628.14  176.68
   1  -2   2 3113.49  210.88
   1  -2   2 3154.78  210.28
  -1  -2  -2 3717.53  198.98
  -1  -2  -2 3745.03  200.18
  -1   2  -2 3139.19  210.58
   1   2   2 3304.77  197.18
  -1   2  -2 3023.10  192.38
  -1   2  -2 3179.48  209.98
   1   2   2 3297.07  196.28
   2  -2   2   88.59   26.50
  -2  -2  -2   71.49   18.50
  -2  -2  -2   70.89   17.90
   2  -2   2   87.49   26.80
   2   2   2   52.09   14.80
  -2   2  -2   93.89   26.10
  -2   2  -2   94.79   25.70
   2   2   2   52.19   15.20
  -3  -2  -2  580.24   50.09
  -3  -2  -2  575.54   49.00
   3  -2   2  436.56   64.79
   3  -2   2  431.16   65.39
   3   2   2  476.05   46.10
   3   2   2  476.95   46.90
   4  -2   2  129.69   34.50
  -4  -2  -2  180.08   31.30
   4  -2   2  128.09   34.90
  -4  -2  -2  178.68   30.50
   4   2   2  198.18   33.90
  -4   2  -2  286.97   48.80
   4   2   2  197.98   33.10
  -4   2  -2  287.27   47.80
  -5  -2  -2  111.99   24.90
   5  -2   2   73.09   27.00
  -5  -2  -2  111.19   24.20
   5  -2   2   73.89   26.70
  -5   2  -2  107.89   28.00
   5   2   2   63.39   20.40
  -5   2  -2  107.49   27.30
   5   2   2   63.39   20.80
   6  -2   2   86.19   29.60
   6  -2   2   85.19   30.00
  -6  -2  -2  125.19   29.50
  -6  -2  -2  125.99   30.30
  -6   2  -2  209.08   40.30
   6   2   2  101.29   24.50
   6   2   2  101.49   24.00
  -6   2  -2  207.68   39.20
   7  -2   2  233.98   48.90
  -7  -2  -2  355.06   51.09
   7  -2   2  236.68   48.40
  -7  -2  -2  353.16   49.80
   7   2   2  260.47   45.90
   7   2   2  259.67   46.70
  -8  -2  -2   70.89   22.20
   8  -2   2   53.69   24.30
   8  -2   2   54.29   24.00
  -8  -2  -2   70.49   21.60
   8   2   2   55.69   25.60
  -8   2  -2   99.79   26.40
  -8   2  -2  100.59   27.30
   8   2   2   55.99   25.10
  -9  -2  -2  171.88   41.60
  -9  -2  -2  171.28   40.50
  -9   2  -2  223.28   42.30
  -9   2  -2  224.68   43.50
 -10  -2  -2  125.89   33.80
 -10  -2  -2  126.29   34.70
  10   2   2   79.69   33.20
 -10   2  -2   87.69   26.50
 -10   2  -2   88.19   27.20
 -11  -2  -2    6.80   27.10
 -11  -2  -2   23.30   22.30
 -11  -2  -2   23.40   22.90
  11   2   2   61.79   34.60
 -11   2  -2   78.19   22.20
 -11   2  -2   77.99   21.60
 -13  -3   2   56.39   23.70
 -13  -3   2   56.29   23.10
 -13  -3   2   -1.80   23.80
  13   3  -2    9.60   54.49
 -13   3   2    7.70   32.30
  13   3  -2    8.30   54.39
 -12  -3   2   22.80   15.00
 -12  -3   2   22.80   15.40
 -12  -3   2  -77.09   24.80
  12   3  -2  -54.69   40.30
  12   3  -2  -46.50   40.00
 -12   3   2  -23.40   20.80
  11  -3  -2    5.10    8.80
  11  -3  -2   -4.40   11.80
 -11  -3   2   45.20   20.60
  11  -3  -2   -4.40   11.90
 -11  -3   2   -4.60   14.40
  11  -3  -2    5.00    8.90
 -11  -3   2   -4.70   14.80
  11   3  -2   55.59   24.90
 -11   3   2   -9.90   14.10
  11   3  -2   55.29   24.20
  11   3  -2   25.90   32.00
  10  -3  -2   -6.70    9.60
  10  -3  -2    1.60   11.70
 -10  -3   2    6.00   15.90
  10  -3  -2    1.60   11.60
 -10  -3   2   30.60   16.40
 -10  -3   2    6.00   15.50
  10  -3  -2   -6.60    9.70
 -10   3   2   -0.20   17.60
  10   3  -2   17.90   28.80
  10   3  -2  -10.40   13.40
  10   3  -2  -10.50   13.80
   9  -3  -2   -0.50    8.80
  -9  -3   2    7.60   12.20
   9  -3  -2   -0.50    8.70
  -9  -3   2   31.50   19.70
   9  -3  -2   -4.80    8.50
  -9  -3   2    7.60   11.90
   9  -3  -2   -4.80    8.60
   9   3  -2   10.70   13.50
   9   3  -2   10.80   13.90
  -9   3   2   20.60   16.90
   9   3  -2   56.49   30.30
   8  -3  -2   32.60    9.70
  -8  -3   2   55.19   17.00
  -8  -3   2   58.69   22.40
  -8  -3   2   55.19   17.40
   8  -3  -2   33.10    9.60
   8  -3  -2   30.60    9.50
   8  -3  -2   30.20    9.60
  -8   3   2   71.89   24.40
   8   3  -2    6.40   19.10
   8   3  -2   57.79   18.40
   8   3  -2   58.19   18.90
  -7  -3   2   -0.90    9.60
  -7  -3   2    9.00    8.00
  -7  -3   2    8.90    7.80
  -7   3   2    3.70    7.20
   7   3  -2   18.40   23.00
   7   3  -2   -3.30    7.30
   7   3  -2   -3.30    7.50
  -6  -3   2  382.16   52.79
  -6  -3   2  333.87   36.50
  -6  -3   2  334.07   37.10
   6   3  -2  305.17   35.90
   6   3  -2  306.17   36.60
  -6   3   2  416.36   41.50
  -5  -3   2  104.69   31.30
  -5  -3   2  118.59   23.20
  -5  -3   2  159.88   30.70
  -5  -3   2  118.29   22.70
  -5   3   2  172.38   27.30
   5   3  -2  137.09   23.40
   5   3  -2  123.99   27.60
   5   3  -2  137.09   23.90
  -4  -3   2  346.67   54.39
  -4  -3   2  262.97   37.20
  -4  -3   2  235.38   27.60
  -4  -3   2  235.58   28.10
   4   3  -2  315.47   30.50
   4   3  -2  329.17   35.00
   4   3  -2  315.57   31.00
  -4   3   2  268.87   27.90
   3  -3  -2 1030.40   59.99
  -3  -3   2 1154.68   90.89
  -3  -3   2 1072.89   76.49
   3  -3  -2 1027.50   59.69
   3   3  -2 1064.19   89.39
  -3   3   2 1034.20   63.19
  -3   3   2 1040.50   62.99
   3   3  -2  964.10   70.69
   3   3  -2 1047.60   89.79
   3   3  -2  964.60   71.39
  -3   3   2  980.10   66.39
   3   3  -2 1082.79   76.89
   2  -3  -2  766.62   49.20
  -2  -3   2  722.53   57.79
  -2  -3   2  784.72   71.19
  -2  -3   2  770.02   71.39
   2  -3  -2  793.82   48.30
   2  -3  -2  771.62   49.60
   2   3  -2  755.72   55.69
  -2   3   2  779.12   50.49
   2   3  -2  758.72   70.49
  -2   3   2  776.62   50.09
   2   3  -2  768.22   70.09
   2   3  -2  834.42   59.99
   2   3  -2  756.62   56.29
  -2   3   2  735.13   48.40
   1  -3  -2  469.25   32.40
  -1  -3   2  525.75   42.40
  -1  -3   2  557.44   58.29
  -1  -3   2  564.24   57.79
  -1   3   2  520.25   32.20
   1   3  -2  464.35   53.19
   1   3  -2  493.25   41.60
  -1   3   2  501.65   38.00
  -1   3   2  498.75   37.50
   1   3  -2  459.55   53.69
   0  -3   2  855.61   60.59
   0  -3   2  819.42   74.89
   0  -3  -2  891.81   60.89
   0  -3   2  810.82   75.49
   0  -3  -2  884.91   60.09
   0   3   2  823.22   59.89
   0   3   2  818.02   59.19
   0   3  -2  870.01   76.89
   0   3  -2  880.41   76.29
   0   3  -2  814.62   59.99
  -1  -3  -2  474.55   39.90
   1  -3   2  338.87   51.39
   1  -3   2  334.97   51.89
  -1  -3  -2  470.95   39.10
  -1   3  -2  455.75   37.90
   1   3   2  448.06   39.80
  -1   3  -2  362.26   54.49
   1   3   2  445.26   39.00
  -1   3  -2  367.06   54.09
  -2  -3  -2  836.22   64.49
   2  -3   2  871.31   78.79
   2  -3   2  882.51   78.29
  -2  -3  -2  830.12   63.49
  -2   3  -2  823.22   76.49
   2   3   2  734.33   61.59
  -2   3  -2  822.62   60.69
  -2   3  -2  813.12   77.09
   2   3   2  738.53   62.49
   3  -3   2  513.95   64.39
  -3  -3  -2  702.03   56.89
  -3  -3  -2  706.83   57.99
   3  -3   2  507.15   64.89
  -3   3  -2  755.72   73.69
  -3   3  -2  762.32   72.89
   3   3   2  601.64   55.79
   3   3   2  598.54   54.79
  -4  -3  -2  177.18   31.60
  -4  -3  -2  178.38   32.40
   4  -3   2  213.58   45.70
   4  -3   2  210.78   46.10
  -4   3  -2  169.48   41.30
   4   3   2  224.68   36.50
  -4   3  -2  170.28   40.60
   4   3   2  225.58   37.40
   5  -3   2   96.89   33.10
  -5  -3  -2  116.89   25.90
   5  -3   2   98.09   32.80
  -5  -3  -2  117.59   26.70
  -5   3  -2  198.78   42.00
   5   3   2  122.09   29.40
  -5   3  -2  198.68   42.90
   5   3   2  121.69   28.70
   6  -3   2  129.09   39.30
   6  -3   2  130.79   38.90
  -6  -3  -2  215.08   39.20
  -6  -3  -2  216.18   40.30
   6   3   2  249.68   43.20
  -6   3  -2  276.97   47.80
   6   3   2  249.97   44.20
  -6   3  -2  278.07   49.00
  -7  -3  -2   53.79   17.90
  -7  -3  -2   53.59   17.50
   7  -3   2   -1.30   18.90
   7  -3   2   -1.30   19.10
   7   3   2   21.80   13.80
   7   3   2   21.90   13.50
  -7   3  -2   45.90   20.00
  -7   3  -2   46.20   20.60
  -8  -3  -2   -2.80   12.50
  -8  -3  -2   -2.70   12.20
   8  -3   2    3.90   19.70
   8  -3   2    4.00   19.50
  -8   3  -2   32.20   17.40
   8   3   2    3.30   17.70
   8   3   2    3.30   17.30
  -8   3  -2   31.90   16.80
  -9  -3  -2  -20.40   13.90
  -9  -3  -2  -20.30   13.50
   9   3   2   14.50   28.70
  -9   3  -2   25.90   18.30
  -9   3  -2   26.10   18.80
 -10  -3  -2   20.00   20.50
 -10  -3  -2   20.00   20.00
 -10   3  -2   -6.10   17.40
 -10   3  -2   -6.10   16.90
 -11  -3  -2   27.50   24.20
 -11  -3  -2   48.70   28.60
 -11  -3  -2   48.60   27.90
  11   3   2   19.60   39.70
 -11   3  -2   35.20   22.20
 -11   3  -2   35.30   22.80
 -13  -4   2   67.59   21.40
 -13  -4   2   67.69   20.90
 -13  -4   2    5.20   37.90
  13   4  -2  -24.40   51.39
  13   4  -2  -22.40   51.29
 -13   4   2   -9.70   29.70
 -12  -4   2   83.49   23.30
 -12  -4   2   83.39   22.80
 -12  -4   2   27.70   29.10
 -12   4   2   65.09   37.60
  12   4  -2   42.50   44.20
  12   4  -2   49.50   44.20
 -11  -4   2   79.19   23.50
 -11  -4   2   83.99   30.00
 -11  -4   2   79.09   22.90
  11   4  -2   28.90   23.50
 -11   4   2   43.10   28.20
  11   4  -2   28.90   24.20
  11   4  -2   67.39   38.30
 -10  -4   2   78.19   23.00
 -10  -4   2   88.69   32.70
 -10  -4   2   78.19   22.50
 -10   4   2   83.09   27.80
  10   4  -2   32.90   34.80
  -9  -4   2  395.76   64.99
  -9  -4   2  315.07   48.00
  -9  -4   2  315.37   49.00
   9   4  -2  441.26   48.70
   9   4  -2  444.66   49.90
  -9   4   2  345.27   56.99
   9   4  -2  444.16   81.19
  -8  -4   2  357.96   42.10
  -8  -4   2  358.06   42.90
  -8  -4   2  336.37   56.69
   8   4  -2  384.56   52.49
   8   4  -2  382.16   51.19
  -8   4   2  330.27   51.19
  -7  -4   2  108.89   25.30
  -7  -4   2  151.28   32.50
  -7  -4   2  108.79   24.70
   7   4  -2  157.88   29.80
  -7   4   2  192.48   34.90
   7   4  -2  157.08   29.00
  -6  -4   2 1257.77  103.19
  -6  -4   2 1306.97   96.19
  -6  -4   2 1463.55  126.59
  -6  -4   2 1308.07   97.29
   6   4  -2 1317.07   97.29
  -6   4   2 1443.56   98.09
   6   4  -2 1320.77   98.39
   6   4  -2 1279.47  121.09
  -5  -4   2 1177.98   97.79
  -5  -4   2 1384.66  120.49
  -5  -4   2 1154.78   91.79
  -5  -4   2 1155.68   92.69
  -5   4   2 1365.66   92.09
   5   4  -2 1475.95  121.89
   5   4  -2 1441.56   96.59
   5   4  -2 1443.56   97.69
   5   4  -2 1509.45  121.99
   5   4  -2 1389.36  101.59
  -4  -4   2 1251.07   86.59
  -4  -4   2 1252.37   87.49
  -4  -4   2 1083.69  102.79
  -4  -4   2 1116.09   88.89
  -4   4   2 1336.57   81.69
   4   4  -2 1084.89  103.59
   4   4  -2 1214.08   85.99
   4   4  -2 1106.49  103.49
   4   4  -2 1214.48   86.79
   4   4  -2 1255.47   90.89
   3  -4  -2   89.49   10.10
  -3  -4   2  121.79   23.00
  -3  -4   2  104.19   32.70
  -3  -4   2   98.39   22.80
  -3  -4   2  121.99   23.50
   3  -4  -2   89.49   10.20
  -3   4   2   80.09   16.10
  -3   4   2   91.39   10.50
   3   4  -2   67.79   24.00
   3   4  -2  122.29   21.80
   3   4  -2   67.79   23.80
   3   4  -2   70.69   18.10
  -3   4   2   99.29   14.60
  -3   4   2   91.99   10.70
   3   4  -2  122.19   21.30
  -2  -4   2  296.27   48.50
   2  -4  -2  265.17   23.20
  -2  -4   2  289.57   48.60
   2  -4  -2  265.97   23.60
  -2  -4   2  223.38   32.30
  -2   4   2  267.47   19.30
  -2   4   2  276.97   24.10
   2   4  -2  253.47   29.10
  -2   4   2  274.77   23.60
   2   4  -2  302.97   30.50
   2   4  -2  302.67   30.00
   2   4  -2  214.88   44.10
   2   4  -2  217.68   43.70
   1  -4  -2  656.23   40.60
  -1  -4   2  719.83   69.79
  -1  -4   2  709.53   70.19
  -1  -4   2  640.24   52.69
  -1   4   2  699.83   49.50
  -1   4   2  705.53   50.29
   1   4  -2  695.83   67.99
   1   4  -2  652.73   52.99
   1   4  -2  688.23   68.59
   0  -4   2  874.91   79.19
   0  -4  -2  841.32   60.59
   0  -4  -2  836.72   59.79
   0  -4   2  792.72   59.99
   0  -4   2  865.11   79.89
   0   4   2  884.11   61.39
   0   4   2  891.31   62.29
   0   4  -2  782.42   59.99
   0   4  -2  718.23   74.59
   0   4  -2  710.33   75.19
   1  -4   2  346.97   53.99
   1  -4   2  350.56   53.39
  -1  -4  -2  303.97   32.20
  -1  -4  -2  305.67   32.90
   1  -4   2  354.36   32.40
  -1   4  -2  264.17   49.80
   1   4   2  308.07   32.40
  -1   4  -2  267.37   49.40
  -1   4  -2  328.87   31.90
   1   4   2  310.57   33.10
  -2  -4  -2   86.09   19.70
   2  -4   2   65.79   25.80
  -2  -4  -2   85.59   19.10
   2  -4   2   66.59   25.50
   2   4   2   65.09   17.60
  -2   4  -2   72.99   17.00
  -2   4  -2   48.60   20.40
  -2   4  -2   47.90   20.60
   2   4   2   64.59   17.10
  -3  -4  -2  392.16   43.00
   3  -4   2  458.85   69.29
   3  -4   2  464.35   68.59
  -3  -4  -2  394.26   43.80
  -3   4  -2  659.53   68.19
   3   4   2  491.35   48.10
  -3   4  -2  651.43   68.79
   3   4   2  494.75   49.10
  -4  -4  -2   61.19   18.50
   4  -4   2   77.89   31.60
  -4  -4  -2   60.89   18.00
   4  -4   2   78.89   31.20
  -4   4  -2   66.29   29.50
   4   4   2  108.79   24.20
  -4   4  -2   66.89   29.10
   4   4   2  108.09   23.50
   5  -4   2  357.66   65.09
  -5  -4  -2  516.75   53.19
   5  -4   2  353.16   65.59
  -5  -4  -2  514.25   52.09
   5   4   2  500.95   53.49
   5   4   2  498.65   52.39
  -6  -4  -2   66.79   21.80
   6  -4   2   58.49   30.00
  -6  -4  -2   67.09   22.40
   6  -4   2   57.79   30.30
  -6   4  -2   85.89   28.80
   6   4   2   99.29   28.30
  -6   4  -2   85.99   29.50
   6   4   2   99.59   29.10
   7  -4   2   75.29   33.80
  -7  -4  -2  133.89   33.70
  -7  -4  -2  133.29   32.90
   7  -4   2   74.29   34.10
  -7   4  -2  176.98   39.60
  -7   4  -2  176.08   38.50
   7   4   2  153.48   35.90
   7   4   2  153.18   35.00
  -8  -4  -2  207.28   42.40
  -8  -4  -2  206.58   41.40
   8   4   2   72.79   40.80
  -8   4  -2  200.88   41.40
   8   4   2  196.58   43.60
  -8   4  -2  202.48   42.70
   8   4   2  196.58   42.70
  -9  -4  -2   93.09   28.70
  -9  -4  -2   93.29   29.40
   9   4   2   74.49   30.00
  -9   4  -2   81.39   25.30
   9   4   2   26.90   20.20
  -9   4  -2   82.09   26.10
   9   4   2   74.39   30.60
 -10  -4  -2  129.19   37.60
 -10  -4  -2   59.99   35.10
 -10  -4  -2  128.99   36.70
 -10   4  -2   24.80   21.60
  10   4   2   30.40   31.80
 -10   4  -2   24.60   21.00
 -11  -4  -2  149.49   51.19
 -11  -4  -2   89.79   31.60
 -11  -4  -2   89.59   30.80
 -11   4  -2  141.19   34.60
 -11   4  -2  140.49   33.70
 -13  -5   2   -9.30   18.20
 -13  -5   2   11.60   39.00
 -13  -5   2   -9.30   17.70
 -13   5   2   32.50   30.70
  13   5  -2    2.90   62.59
  13   5  -2   -0.30   62.79
 -12  -5   2   65.39   23.40
 -12  -5   2   -3.70   22.20
 -12  -5   2   65.49   23.90
  12   5  -2   46.10   48.90
  12   5  -2   54.69   48.90
 -12   5   2  -12.00   22.20
 -11  -5   2   23.20   15.80
 -11  -5   2   23.20   16.10
 -11  -5   2   13.00   25.80
  11   5  -2   24.10   36.60
 -11   5   2  -24.10   16.40
 -10  -5   2   63.69   24.20
 -10  -5   2   13.40   23.90
 -10  -5   2   63.59   23.60
 -10   5   2   26.90   19.10
  10   5  -2    8.50   31.50
  -9  -5   2   14.30   14.40
  -9  -5   2    9.50   21.30
  -9  -5   2   14.30   14.10
   9   5  -2    7.60   13.50
  -9   5   2    3.80    9.60
   9   5  -2    7.40   13.90
  -8  -5   2   67.59   21.80
  -8  -5   2   89.19   29.90
  -8  -5   2   67.69   22.30
  -8   5   2  129.49   29.30
   8   5  -2  107.59   38.70
   8   5  -2  149.79   31.00
   8   5  -2  150.68   31.90
  -7  -5   2   11.90   11.40
  -7  -5   2   11.90   11.70
  -7  -5   2   26.50   20.80
   7   5  -2   40.70   14.80
   7   5  -2   19.00   24.30
   7   5  -2   40.90   15.20
  -7   5   2   41.10   14.80
  -6  -5   2  147.59   33.10
  -6  -5   2  156.88   45.80
  -6  -5   2  173.38   31.90
  -6  -5   2  173.28   31.20
   6   5  -2  247.68   55.79
   6   5  -2  224.68   37.80
  -6   5   2  199.68   33.00
   6   5  -2  223.98   36.90
  -5  -5   2  103.49   24.30
  -5  -5   2  109.99   35.80
  -5   5   2  134.09   23.40
   5   5  -2   84.89   34.60
   5   5  -2  144.39   28.10
   5   5  -2  118.59   26.50
   5   5  -2   82.59   34.60
   5   5  -2  144.59   28.70
  -4  -5   2 1092.69   83.99
  -4  -5   2 1091.69   82.99
  -4  -5   2 1049.79  105.09
  -4  -5   2  912.11   81.59
  -4   5   2 1042.90   72.29
   4   5  -2 1203.28  107.59
  -4   5   2 1029.60   72.59
  -4   5   2 1091.09   65.89
   4   5  -2 1261.57   85.89
   4   5  -2 1262.07   86.89
   4   5  -2 1181.58  107.69
   4   5  -2 1193.78   87.39
  -4   5   2 1173.88   74.29
  -4   5   2 1082.29   65.59
   3  -5  -2  799.52   55.59
  -3  -5   2  881.51   69.79
  -3  -5   2  831.12   86.49
  -3  -5   2  862.81   67.69
  -3  -5   2  863.81   68.59
   3  -5  -2  799.52   55.99
  -3   5   2  951.10   57.49
   3   5  -2  879.41   67.89
  -3   5   2  860.71   66.79
   3   5  -2  786.82   83.89
   3   5  -2  879.51   68.69
   3   5  -2  889.91   69.69
   3   5  -2  773.12   84.19
  -3   5   2  944.91   56.99
  -3   5   2  905.81   55.69
  -2  -5   2 2737.03  203.78
   2  -5  -2 2924.31  173.98
  -2  -5   2 2879.61  183.08
  -2  -5   2 2673.93  203.68
   2  -5  -2 2920.21  173.38
  -2   5   2 3016.10  174.68
   2   5  -2 2959.80  206.38
   2   5  -2 2918.21  207.08
   2   5  -2 3238.28  184.08
  -2   5   2 2994.90  173.88
  -2   5   2 3066.79  189.98
   2   5  -2 3240.58  185.18
   2   5  -2 2938.91  183.48
  -1  -5   2 1392.86  100.19
  -1  -5   2 1563.44  123.39
  -1  -5   2 1537.15  123.79
   1  -5  -2 1422.16   83.59
  -1   5   2 1547.25   97.59
  -1   5   2 1558.14   98.49
   1   5  -2 1526.95  102.09
   1   5  -2 1655.43  125.49
   1   5  -2 1525.25  101.19
   1   5  -2 1410.76   99.99
  -1   5   2 1520.15  115.09
   1   5  -2 1674.73  124.69
   0  -5   2  436.26   64.29
   0  -5   2  430.66   64.89
   0  -5  -2  463.25   40.30
   0  -5   2  406.36   38.80
   0  -5  -2  465.05   41.00
   0   5   2  483.25   41.80
   0   5   2  479.65   41.00
   0   5  -2  475.45   41.00
   0   5  -2  378.06   61.29
   0   5  -2  381.96   60.59
  -1  -5  -2  962.30   72.19
  -1  -5  -2  958.50   71.29
   1  -5   2  930.81   89.69
   1  -5   2  995.70   69.39
   1  -5   2  941.21   88.99
  -1   5  -2  791.22   85.79
  -1   5  -2  800.52   85.19
   1   5   2 1027.90   72.69
   1   5   2 1036.10   73.89
  -1   5  -2  882.41   68.59
   2  -5   2  721.13   71.19
   2  -5   2  713.63   71.99
  -2  -5  -2  604.84   53.59
  -2  -5  -2  602.14   52.59
  -2   5  -2  401.16   67.39
  -2   5  -2  551.74   49.30
   2   5   2  560.14   52.69
   2   5   2  555.64   51.59
  -2   5  -2  396.06   67.89
  -3  -5  -2 1035.40   83.19
   3  -5   2 1123.69  100.29
  -3  -5  -2 1030.90   81.99
   3  -5   2 1111.39  101.19
   3   5   2 1075.49   84.19
  -3   5  -2  935.71   98.09
  -3   5  -2  949.01   97.49
   3   5   2 1084.09   85.59
  -3   5  -2 1111.89   80.69
   4  -5   2  209.18   45.20
  -4  -5  -2  225.98   36.80
  -4  -5  -2  226.98   37.70
   4  -5   2  211.58   44.70
   4   5   2  228.48   40.20
   4   5   2  226.68   39.10
  -4   5  -2  192.48   46.20
  -4   5  -2  194.38   45.60
   5  -5   2  270.07   55.09
  -5  -5  -2  126.39   30.10
   5  -5   2  266.97   55.69
  -5  -5  -2  126.89   30.80
   5   5   2  178.98   37.20
  -5   5  -2  116.49   34.70
  -5   5  -2  115.79   35.20
   5   5   2  177.78   36.10
   6  -5   2   70.49   38.00
  -6  -5  -2  160.28   35.90
   6  -5   2   71.39   37.60
  -6  -5  -2  159.68   35.00
   6   5   2   76.19   26.30
  -6   5  -2  178.38   42.20
   6   5   2   68.69   30.50
   6   5   2   75.89   25.60
  -6   5  -2  178.08   43.00
  -7  -5  -2  128.89   34.20
   7  -5   2  198.68   50.49
   7  -5   2  196.28   50.99
  -7  -5  -2  129.39   35.00
  -7   5  -2  290.47   55.09
   7   5   2  164.28   45.90
  -7   5  -2  289.57   53.69
   7   5   2  168.38   38.50
   7   5   2  167.78   37.50
   8  -5   2   47.50   28.90
  -8  -5  -2   60.89   22.90
   8  -5   2   48.10   28.60
  -8  -5  -2   61.09   23.50
  -8   5  -2   90.59   31.80
   8   5   2   47.60   33.40
  -8   5  -2   89.99   30.90
   8   5   2   62.19   26.80
   8   5   2   62.09   26.20
  -9  -5  -2   15.50   27.90
  -9  -5  -2  -24.40   14.00
  -9  -5  -2  -24.40   14.30
   9   5   2  -29.70   21.70
  -9   5  -2   21.10   16.30
   9   5   2  -23.70   29.40
   9   5   2  -29.70   22.20
  -9   5  -2   21.30   16.80
 -10  -5  -2   21.70   23.60
 -10  -5  -2   21.70   23.00
 -10  -5  -2   12.60   26.10
 -10   5  -2   -5.60   15.30
  10   5   2  -10.40   31.70
 -10   5  -2   -5.70   15.80
 -11  -5  -2   57.39   26.30
 -11  -5  -2   57.29   25.70
 -11  -5  -2   20.00   35.10
  11   5   2   -8.30   39.40
 -11   5  -2   14.10   20.70
 -11   5  -2   14.20   21.30
 -12  -6   2   53.59   22.00
 -12  -6   2  -10.50   35.10
 -12  -6   2   53.59   22.50
  12   6  -2   55.79   47.70
  12   6  -2   55.39   47.70
 -12   6   2   25.80   24.70
 -11  -6   2   90.19   42.70
 -11  -6   2  125.39   36.00
 -11  -6   2  125.49   36.80
 -11   6   2  135.29   34.60
 -10  -6   2  146.29   49.20
 -10  -6   2  242.68   41.00
 -10  -6   2  242.88   41.90
 -10   6   2  285.97   51.59
  10   6  -2  102.29   49.40
  -9  -6   2   21.00   29.50
  -9  -6   2   75.09   27.00
  -9  -6   2   74.99   26.40
   9   6  -2   78.69   27.10
   9   6  -2   78.19   26.30
   9   6  -2   95.19   37.80
  -9   6   2   79.59   25.80
  -8  -6   2  208.68   39.10
  -8  -6   2  207.18   46.70
  -8  -6   2  208.48   38.20
  -8   6   2  234.18   39.60
   8   6  -2  174.98   40.60
   8   6  -2  174.08   39.50
   8   6  -2   86.69   48.70
  -7  -6   2  405.86   61.29
  -7  -6   2  374.76   44.00
  -7  -6   2  375.06   44.80
   7   6  -2  364.56   52.39
  -7   6   2  293.57   42.60
   7   6  -2  363.06   51.19
   7   6  -2  350.16   76.89
  -6  -6   2  171.38   52.19
  -6  -6   2  144.79   31.20
  -6  -6   2  188.48   37.60
  -6  -6   2  144.99   31.90
   6   6  -2  170.18   56.49
   6   6  -2  118.79   28.20
  -6   6   2  139.19   26.40
   6   6  -2  118.49   27.60
  -5  -6   2   68.09   20.50
  -5  -6   2   68.09   21.00
  -5  -6   2   23.50   18.30
  -5  -6   2   59.29   23.40
  -5   6   2   57.39    8.00
   5   6  -2   78.59   21.20
   5   6  -2   31.40   20.00
   5   6  -2   78.39   20.70
  -5   6   2   77.29   14.70
   5   6  -2   32.50   24.00
  -5   6   2  104.99   19.50
  -5   6   2   76.29   14.80
  -5   6   2   57.89    8.20
   5   6  -2   31.90   24.00
  -4  -6   2  144.49   28.10
  -4  -6   2  144.69   28.80
  -4  -6   2  156.38   39.60
  -4  -6   2  188.88   34.00
  -4   6   2  185.68   16.90
   4   6  -2  132.09   39.30
  -4   6   2  136.99   26.30
  -4   6   2  161.38   18.70
  -4   6   2  135.09   26.50
   4   6  -2  128.69   39.40
   4   6  -2  175.78   31.10
   4   6  -2  175.88   31.80
  -4   6   2  186.78   17.30
   4   6  -2  166.18   32.60
   3  -6  -2  748.53   51.79
  -3  -6   2  805.22   65.19
  -3  -6   2  748.43   62.49
   3  -6  -2  748.33   52.29
  -3  -6   2  720.13   82.99
  -3  -6   2  749.33   63.49
  -3   6   2  706.43   51.09
   3   6  -2  700.93   81.19
   3   6  -2  756.22   63.19
   3   6  -2  635.04   59.59
  -3   6   2  784.42   47.00
   3   6  -2  713.13   80.79
  -3   6   2  702.43   50.49
   3   6  -2  635.04   60.39
  -3   6   2  688.03   62.59
   2  -6  -2  421.96   34.70
   2  -6  -2  422.16   35.20
  -2  -6   2  401.26   41.10
  -2  -6   2  319.67   59.99
   2   6  -2  384.66   39.60
   2   6  -2  369.46   65.69
   2   6  -2  374.76   65.19
  -2   6   2  375.36   33.30
  -2   6   2  377.46   33.90
   2   6  -2  384.96   40.30
   2   6  -2  351.36   37.90
  -2   6   2  307.57   47.70
  -1  -6   2    6.20   15.00
  -1  -6   2    5.00   15.00
   1  -6  -2   -0.30    4.10
   1  -6  -2   -0.30    4.20
  -1  -6   2   13.70    9.50
   1   6  -2  -11.80    8.40
  -1   6   2    0.70    6.80
   1   6  -2    7.10    8.00
  -1   6   2    0.70    6.60
   1   6  -2  -11.60    8.50
   1   6  -2    7.00    7.80
   1   6  -2    5.50    8.80
  -1   6   2   -3.90   10.60
   0  -6   2    3.50   17.10
   0  -6  -2   21.00    6.30
   0  -6   2   12.10    9.60
   0  -6   2    4.70   17.00
   0  -6  -2   20.30    8.20
   0  -6  -2   20.20    8.00
   0   6  -2   10.00   15.10
   0   6  -2   10.10   14.90
   0   6   2    8.80   14.30
   0   6   2    7.40    6.70
   0   6   2    7.50    6.90
  -1  -6  -2  312.07   35.10
   1  -6   2  303.17   32.20
   1  -6   2  271.67   50.89
  -1  -6  -2  312.87   35.80
   1  -6   2  268.27   51.39
  -1   6  -2  278.47   32.10
  -1   6  -2  311.47   56.19
  -1   6  -2  308.17   56.79
   1   6   2  326.57   37.40
   1   6   2  324.17   36.50
   1   6   2  345.27   63.59
  -2  -6  -2  479.95   47.70
   2  -6   2  517.25   76.49
   2  -6   2  522.95   75.69
  -2  -6  -2  481.45   48.60
  -2   6  -2  433.86   44.80
  -2   6  -2  489.35   74.39
   2   6   2  474.75   47.80
   2   6   2  478.35   48.80
   2   6   2  539.05   81.09
  -2   6  -2  483.45   75.09
  -3  -6  -2  363.16   40.00
   3  -6   2  264.67   54.99
   3  -6   2  267.47   54.39
  -3  -6  -2  364.46   40.90
   3   6   2  271.67   44.20
  -3   6  -2  229.58   53.09
  -3   6  -2  281.67   40.30
  -3   6  -2  226.68   53.59
   3   6   2  369.86   67.99
   3   6   2  269.37   43.00
  -4  -6  -2  373.86   44.10
   4  -6   2  298.87   60.79
  -4  -6  -2  372.66   43.20
   4  -6   2  301.97   60.19
  -4   6  -2  404.56   44.30
   4   6   2  344.87   51.99
   4   6   2  404.86   77.19
   4   6   2  342.07   50.59
  -4   6  -2  340.27   66.99
  -4   6  -2  336.27   67.69
   5  -6   2  223.38   54.79
   5  -6   2  220.98   55.39
  -5  -6  -2  178.08   35.90
  -5  -6  -2  178.68   36.70
   5   6   2  318.57   51.29
  -5   6  -2  377.76   65.99
   5   6   2  316.17   49.90
  -5   6  -2  374.66   66.89
   5   6   2  258.07   60.99
  -6  -6  -2  712.43   70.49
  -6  -6  -2  714.33   71.89
   6  -6   2  612.44   91.89
   6  -6   2  619.24   90.99
   6   6   2  462.25   89.29
  -6   6  -2  857.11   85.69
  -6   6  -2  862.21   84.39
   6   6   2  641.84   70.99
   6   6   2  637.94   69.59
  -7  -6  -2  318.97   56.99
   7  -6   2  223.18   57.09
  -7  -6  -2  275.47   47.60
   7  -6   2  220.68   57.79
  -7  -6  -2  274.77   46.60
   7   6   2  283.07   52.49
  -7   6  -2  463.55   67.59
  -7   6  -2  463.45   66.19
   7   6   2  284.47   53.79
   7   6   2  172.28   51.09
  -8  -6  -2    0.90   19.70
  -8  -6  -2    1.10   13.50
   8  -6   2   59.29   26.00
  -8  -6  -2    1.10   13.80
   8  -6   2   58.69   26.30
   8   6   2   42.40   25.40
   8   6   2   42.30   24.70
  -8   6  -2   13.70   22.60
   8   6   2   12.50   33.90
  -8   6  -2   13.60   21.90
  -9  -6  -2   23.30   22.00
  -9  -6  -2   96.79   35.60
  -9  -6  -2   23.30   21.50
  -9   6  -2   68.69   23.60
   9   6   2   55.69   32.70
  -9   6  -2   68.19   22.90
   9   6   2   55.79   33.50
   9   6   2   -1.90   35.20
 -10  -6  -2   94.19   33.50
 -10  -6  -2   70.69   36.40
 -10  -6  -2   94.49   34.30
 -10   6  -2   56.49   22.80
  10   6   2   40.60   37.50
 -10   6  -2   56.09   22.10
 -11  -6  -2  100.59   45.00
 -11  -6  -2   65.09   27.60
 -11  -6  -2   65.09   28.30
 -11   6  -2   48.20   24.20
 -11   6  -2   47.90   23.60
  11   6   2   69.59   55.09
 -12  -7   2  -24.50   33.60
 -12  -7   2   33.30   22.70
 -12  -7   2   33.30   23.20
 -12   7   2  -64.59   20.30
 -11  -7   2  -36.60   27.00
 -11  -7   2   20.50   18.40
 -11  -7   2   20.50   18.90
 -11   7   2  -30.60   17.40
  11   7  -2   89.29   54.09
  11   7  -2   72.09   54.19
 -10  -7   2    9.90   19.80
 -10  -7   2    9.80   19.40
 -10  -7   2   42.40   27.30
 -10   7   2   57.89   25.70
  10   7  -2   44.70   21.50
  10   7  -2   37.90   41.90
  10   7  -2   44.40   20.90
  -9  -7   2   19.70   18.50
  -9  -7   2   19.70   19.00
  -9  -7   2   28.20   21.60
   9   7  -2   19.90   25.80
   9   7  -2   33.10   43.10
   9   7  -2   19.70   25.10
  -9   7   2   30.60   16.40
  -8  -7   2   11.80   10.90
  -8  -7   2   11.80   11.10
  -8  -7   2   16.70   18.30
  -8   7   2   24.80   12.20
   8   7  -2  -12.30   17.20
   8   7  -2   37.60   36.40
   8   7  -2  -12.20   17.70
  -7  -7   2   73.09   25.30
  -7  -7   2   88.09   29.60
  -7  -7   2   73.09   25.90
   7   7  -2   65.09   22.50
   7   7  -2   74.29   48.20
   7   7  -2   64.79   22.00
  -7   7   2   92.59   22.50
  -6  -7   2  306.27   70.19
  -6  -7   2  290.47   51.69
  -6  -7   2  314.27   48.90
  -6  -7   2  313.97   47.90
  -6   7   2  306.77   21.10
   6   7  -2  418.86   57.79
   6   7  -2  394.96   78.29
  -6   7   2  309.27   21.30
  -6   7   2  359.96   25.20
   6   7  -2  388.06   78.29
  -6   7   2  357.06   25.40
  -6   7   2  374.86   38.10
   6   7  -2  417.76   56.49
  -5  -7   2  168.68   34.00
  -5  -7   2  161.48   33.00
  -5  -7   2  161.58   33.80
  -5  -7   2  209.98   56.49
   5   7  -2  151.88   31.80
   5   7  -2  122.49   41.90
   5   7  -2  122.79   42.00
  -5   7   2  183.68   29.30
   5   7  -2  152.08   32.50
  -5   7   2  153.68   15.30
  -5   7   2  181.68   29.70
  -5   7   2  140.19   22.60
   5   7  -2  191.18   35.60
  -5   7   2  154.58   15.60
  -4  -7   2  997.50   79.49
  -4  -7   2 1009.80  107.89
  -4  -7   2  996.40   78.29
  -4  -7   2  943.81   77.89
  -4   7   2  909.61   60.59
   4   7  -2  907.61   77.79
  -4   7   2  827.42   74.19
  -4   7   2  898.91   60.59
   4   7  -2  960.80   78.39
   4   7  -2  779.62   95.19
  -4   7   2  840.12   73.79
   4   7  -2  907.11   76.69
  -4   7   2  903.51   61.19
   4   7  -2  765.12   95.39
   3  -7  -2  339.47   33.70
  -3  -7   2  275.17   59.09
   3  -7  -2  338.47   33.30
  -3  -7   2  379.66   43.50
  -3  -7   2  349.47   41.90
  -3  -7   2  379.26   42.70
   3   7  -2  386.16   69.99
   3   7  -2  408.66   44.40
  -3   7   2  435.06   27.50
  -3   7   2  414.26   34.90
  -3   7   2  371.16   53.79
  -3   7   2  408.56   26.80
   3   7  -2  390.16   69.59
   3   7  -2  408.46   43.60
   3   7  -2  437.76   45.30
  -3   7   2  416.36   35.60
  -2  -7   2  718.93   62.29
  -2  -7   2  750.92   84.09
   2  -7  -2  647.24   54.49
   2  -7  -2  647.34   55.09
   2   7  -2  858.51   64.99
  -2   7   2  727.93   55.89
  -2   7   2  740.33   73.69
   2   7  -2  803.42   87.19
   2   7  -2  791.52   87.79
   2   7  -2  753.32   63.39
  -2   7   2  731.73   56.69
   2   7  -2  753.62   64.39
  -1  -7   2  724.63   83.29
   1  -7  -2  818.82   62.19
  -1  -7   2  709.83   83.29
  -1  -7   2  751.52   63.09
   1  -7  -2  819.52   62.99
   1   7  -2  857.91   65.69
   1   7  -2  817.72   65.69
   1   7  -2  651.23   93.49
   1   7  -2  643.24   94.29
  -1   7   2  813.22   61.99
  -1   7   2  721.13   78.99
   1   7  -2  818.32   66.59
  -1   7   2  817.72   62.89
   0  -7   2  588.54   85.89
   0  -7  -2  605.24   52.19
   0  -7  -2  606.14   53.09
   0  -7   2  599.94   85.59
   0  -7  -2  603.94   39.80
   0  -7   2  518.05   48.10
   0   7  -2  520.25   49.00
   0   7  -2  530.95   50.19
   0   7   2  573.24   50.69
   0   7  -2  461.15   73.69
   0   7  -2  531.55   50.89
   0   7   2  576.64   51.69
   0   7   2  628.04   87.39
   0   7  -2  456.25   74.49
   1  -7   2  422.56   70.79
  -1  -7  -2  432.16   46.10
  -1  -7  -2  431.36   45.30
   1  -7   2  428.96   70.29
  -1  -7  -2  428.16   37.40
   1  -7   2  450.05   43.10
  -1   7  -2  467.75   75.39
   1   7   2  549.95   49.30
   1   7   2  553.64   50.39
  -1   7  -2  475.65   45.20
   1   7   2  436.16   76.49
  -1   7  -2  472.65   74.59
  -2  -7  -2  531.05   43.40
  -2  -7  -2  449.95   46.90
  -2  -7  -2  450.95   47.80
   2  -7   2  363.46   66.89
   2  -7   2  358.86   67.49
   2   7   2  435.56   78.39
  -2   7  -2  343.57   64.79
  -2   7  -2  347.67   64.09
   2   7   2  461.85   48.30
   2   7   2  465.15   49.50
  -2   7  -2  405.06   44.00
  -3  -7  -2  471.55   52.59
  -3  -7  -2  472.65   53.49
   3  -7   2  653.63   91.69
   3  -7   2  646.24   92.69
  -3  -7  -2  626.34   53.79
   3   7   2  606.14   58.29
   3   7   2  461.85   84.29
  -3   7  -2  574.24   54.59
  -3   7  -2  471.45   78.79
  -3   7  -2  465.45   79.49
   3   7   2  610.94   59.69
  -4  -7  -2  315.57   48.70
  -4  -7  -2  314.77   47.60
   4  -7   2  324.57   63.89
  -4  -7  -2  315.57   44.40
   4  -7   2  321.17   64.59
   4   7   2  230.38   58.19
   4   7   2  384.56   55.59
  -4   7  -2  345.67   49.10
   4   7   2  387.76   57.19
  -4   7  -2  254.97   60.09
  -4   7  -2  251.77   60.69
   5  -7   2  248.78   61.09
  -5  -7  -2  255.07   45.00
  -5  -7  -2  319.87   49.00
   5  -7   2  251.27   60.39
  -5  -7  -2  255.77   46.10
   5   7   2  280.87   47.90
  -5   7  -2  217.58   53.99
  -5   7  -2  219.78   53.39
   5   7   2  283.17   49.30
   5   7   2  186.08   57.39
  -5   7  -2  284.17   45.10
  -6  -7  -2  285.07   49.70
  -6  -7  -2  285.77   50.79
  -6  -7  -2  372.76   57.89
   6  -7   2  306.07   67.39
   6  -7   2  302.97   68.19
   6   7   2  284.67   63.99
  -6   7  -2  307.17   62.19
   6   7   2  357.26   60.29
   6   7   2  354.66   58.59
  -6   7  -2  305.27   63.09
  -7  -7  -2   73.69   26.60
  -7  -7  -2   73.59   25.90
  -7   7  -2   48.30   28.10
   7   7   2  -13.10   27.50
  -7   7  -2   48.20   28.70
  -8  -7  -2   26.70   22.30
   8  -7   2  -26.60   29.40
  -8  -7  -2    0.60   15.40
  -8  -7  -2   26.80   22.90
   8  -7   2  -26.90   29.00
  -8   7  -2    9.40   20.30
   8   7   2   26.50   25.60
   8   7   2   26.60   26.30
   8   7   2   21.10   37.60
  -8   7  -2    9.30   19.80
  -9  -7  -2  -28.90   22.40
   9  -7   2  -19.60   32.90
  -9  -7  -2   25.90   24.30
   9  -7   2  -19.40   33.30
  -9  -7  -2  -28.90   23.00
  -9   7  -2   13.10   18.60
  -9   7  -2   13.20   19.20
   9   7   2   -3.50   39.90
 -10  -7  -2  -23.80   21.50
 -10  -7  -2  -23.80   22.00
 -10  -7  -2   37.00   36.50
 -10   7  -2   32.70   20.20
  10   7   2   20.30   44.20
 -10   7  -2   32.40   19.50
 -11  -7  -2  -28.70   26.90
 -11  -7  -2  -17.80   36.80
 -11  -7  -2  -28.90   26.20
 -11   7  -2   11.90   22.00
 -11   7  -2   11.90   22.70
  11   7   2  -52.69   47.20
 -12  -8   2  104.49   35.50
 -12  -8   2   16.10   42.10
 -12  -8   2  104.29   34.60
 -12   8   2   -2.00   26.70
  12   8  -2    2.20   58.79
  12   8  -2   16.90   58.69
 -11  -8   2   48.90   41.00
 -11  -8   2   94.69   30.90
 -11  -8   2   94.59   30.20
 -11   8   2   42.70   27.90
  11   8  -2   75.39   57.39
  11   8  -2   89.49   57.29
 -10  -8   2   31.60   19.30
 -10  -8   2   31.60   18.90
 -10  -8   2   53.19   29.30
 -10   8   2   60.19   25.80
  10   8  -2   73.59   46.10
  10   8  -2   73.69   32.50
  10   8  -2   55.09   46.20
  10   8  -2   73.19   31.50
  -9  -8   2  221.28   55.99
  -9  -8   2  142.29   36.70
  -9  -8   2  142.09   35.80
  -9   8   2  121.49   29.90
   9   8  -2  114.89   33.30
   9   8  -2  115.59   34.30
   9   8  -2  134.29   58.59
  -8  -8   2   91.09   32.80
  -8  -8   2  109.19   33.30
  -8  -8   2  109.19   34.10
   8   8  -2  101.99   30.60
   8   8  -2   91.59   53.59
  -8   8   2  118.89   28.50
   8   8  -2  102.49   31.50
  -7  -8   2   41.10   17.20
  -7  -8   2   68.29   24.70
  -7  -8   2   68.09   24.10
   7   8  -2   97.59   38.20
   7   8  -2   65.39   25.60
  -7   8   2   94.39   23.80
   7   8  -2   65.69   26.30
   7   8  -2   99.49   38.10
  -6  -8   2   83.89   27.90
  -6  -8   2   79.99   24.90
  -6  -8   2   24.50   20.30
  -6  -8   2   80.09   25.50
  -6   8   2   61.39   17.90
   6   8  -2   44.60   41.60
   6   8  -2   45.40   41.60
  -6   8   2   60.69   18.10
  -6   8   2   60.29   10.10
   6   8  -2  105.59   27.00
  -6   8   2   59.89    9.90
  -6   8   2   64.49   16.90
   6   8  -2  105.89   27.70
  -5  -8   2  412.76   48.40
  -5  -8   2  423.26   81.89
  -5  -8   2  413.36   57.99
  -5  -8   2  413.16   49.30
  -5   8   2  391.06   32.10
  -5   8   2  388.86   46.00
   5   8  -2  371.56   56.09
   5   8  -2  353.56   75.59
   5   8  -2  440.26   49.99
   5   8  -2  361.56   75.49
  -5   8   2  393.06   32.60
  -5   8   2  392.96   45.60
  -5   8   2  386.36   35.00
   5   8  -2  440.96   50.99
  -4  -8   2  358.56   50.69
  -4  -8   2  314.57   67.59
  -4  -8   2  343.07   50.29
  -4  -8   2  358.16   49.60
   4   8  -2  335.57   73.19
   4   8  -2  322.87   48.30
  -4   8   2  329.47   49.80
  -4   8   2  334.37   49.40
  -4   8   2  323.77   26.80
   4   8  -2  284.87   44.50
   4   8  -2  323.27   49.40
   4   8  -2  344.77   72.89
  -4   8   2  284.97   29.10
  -4   8   2  286.27   29.70
  -3  -8   2  292.87   64.69
  -3  -8   2  173.88   34.00
   3  -8  -2  243.38   26.90
   3  -8  -2  243.18   26.40
  -3  -8   2  232.18   38.00
  -3  -8   2  173.58   33.20
  -3   8   2  152.98   37.00
   3   8  -2  177.38   49.90
   3   8  -2  200.58   37.50
  -3   8   2  205.58   28.00
  -3   8   2  206.58   28.70
   3   8  -2  200.48   36.70
   3   8  -2  176.18   50.09
  -3   8   2  170.18   13.30
   3   8  -2  234.08   37.50
  -3   8   2  170.88   13.40
  -2  -8   2  173.58   32.90
  -2  -8   2  327.07   68.09
  -2   8   2  234.48   49.10
   2   8  -2  296.27   41.00
   2   8  -2  271.77   42.30
   2   8  -2  271.57   41.40
   2   8  -2  263.57   56.09
  -2   8   2  252.37   29.50
   2   8  -2  259.97   56.49
  -2   8   2  253.57   30.10
   1  -8  -2  161.38   27.40
  -1  -8   2  136.59   46.90
   1  -8  -2  161.48   28.00
  -1  -8   2  149.79   28.40
   1   8  -2  118.19   25.00
   1   8  -2  118.19   25.60
   1   8  -2  198.08   51.49
   1   8  -2  200.58   50.99
   1   8  -2   92.39   23.80
  -1   8   2  114.49   23.90
  -1   8   2  100.69   34.90
  -1   8   2  115.19   24.60
   0  -8   2  415.16   70.99
   0  -8  -2  419.66   32.10
   0  -8  -2  471.45   44.80
   0  -8  -2  471.85   45.60
   0  -8   2  462.35   43.40
   0  -8   2  404.36   71.09
   0   8  -2  411.56   42.80
   0   8  -2  388.66   43.70
   0   8   2  394.36   73.09
   0   8  -2  479.15   79.69
   0   8   2  389.76   43.50
   0   8  -2  388.36   43.00
   0   8  -2  484.35   78.79
   0   8   2  387.56   42.60
   1  -8   2  166.98   43.80
  -1  -8  -2  179.28   32.00
  -1  -8  -2  129.09   21.70
  -1  -8  -2  179.08   31.30
   1  -8   2  170.08   43.50
   1  -8   2  172.58   29.70
   1   8   2  139.59   43.60
  -1   8  -2  131.29   26.60
  -1   8  -2  131.49   27.10
   1   8   2  178.78   33.30
   1   8   2  179.88   34.20
  -1   8  -2  148.69   28.10
  -1   8  -2  144.89   39.30
  -1   8  -2  146.39   38.90
   2  -8   2   97.89   35.90
  -2  -8  -2  189.58   34.70
  -2  -8  -2  144.39   25.50
  -2  -8  -2  189.98   35.60
   2  -8   2   96.49   36.10
   2   8   2  125.79   31.60
  -2   8  -2  131.79   42.40
   2   8   2  103.79   38.70
   2   8   2  124.99   30.70
  -2   8  -2  133.29   42.00
  -2   8  -2  197.88   34.00
   3  -8   2  250.07   58.19
  -3  -8  -2  284.17   41.20
   3  -8   2  246.78   58.69
  -3  -8  -2  273.47   46.20
  -3  -8  -2  273.97   47.20
  -3   8  -2  293.97   66.29
   3   8   2  328.37   49.60
  -3   8  -2  265.27   43.10
   3   8   2  377.66   76.09
  -3   8  -2  297.67   65.69
   3   8   2  330.97   50.99
  -4  -8  -2  310.07   46.40
   4  -8   2  389.06   71.79
  -4  -8  -2  239.08   42.50
   4  -8   2  393.76   71.09
  -4  -8  -2  239.58   43.40
  -4   8  -2  265.17   64.89
  -4   8  -2  268.57   64.29
  -4   8  -2  318.87   47.60
   4   8   2  232.88   43.00
   4   8   2  234.58   44.20
   4   8   2  198.68   58.79
  -5  -8  -2  577.64   60.09
  -5  -8  -2  541.05   60.49
  -5  -8  -2  541.95   61.59
   5  -8   2  470.15   83.19
   5  -8   2  475.45   82.39
   5   8   2  531.45   62.49
  -5   8  -2  542.75   85.39
  -5   8  -2  536.35   86.29
  -5   8  -2  539.55   59.59
   5   8   2  536.55  100.59
   5   8   2  527.15   60.99
   6  -8   2  322.87   68.19
   6  -8   2  319.37   68.99
  -6  -8  -2  176.08   39.30
  -6  -8  -2  176.38   40.20
  -6  -8  -2  200.68   41.10
  -6   8  -2  155.58   47.50
   6   8   2  173.38   44.20
  -6   8  -2  154.28   48.20
  -6   8  -2  179.18   40.10
   6   8   2  174.78   45.50
   6   8   2  158.08   49.80
   7  -8   2   96.49   40.50
   7  -8   2   97.49   40.00
  -7  -8  -2  132.39   36.70
  -7  -8  -2  134.69   38.70
  -7  -8  -2  134.39   37.80
   7   8   2  165.88   36.80
   7   8   2  166.98   37.90
   7   8   2   67.89   31.80
  -7   8  -2  171.98   41.10
  -7   8  -2  171.18   41.80
  -8  -8  -2  158.78   42.10
  -8  -8  -2  158.98   43.00
  -8  -8  -2  186.48   47.80
  -8   8  -2  258.67   51.09
   8   8   2  278.07   55.59
  -8   8  -2  258.87   52.29
   8   8   2  276.57   54.19
   8   8   2  220.98   66.59
  -9  -8  -2   88.99   29.10
  -9  -8  -2   89.09   29.80
  -9  -8  -2   39.40   27.20
   9   8   2   19.20   42.70
  -9   8  -2   56.69   28.20
  -9   8  -2   56.39   27.40
 -10  -8  -2  186.38   54.79
  10   8   2   20.20   51.49
 -10   8  -2   90.89   26.00
 -10   8  -2   91.59   26.80
 -12  -9   2  -33.40   39.80
 -12  -9   2   52.59   25.00
 -12  -9   2   52.59   24.40
  12   9  -2  -89.49   59.29
  12   9  -2 -108.49   59.19
 -12   9   2  -30.10   23.30
 -11  -9   2   -7.50   23.60
 -11  -9   2   45.40   21.10
 -11  -9   2   45.40   20.60
 -11   9   2  -32.30   21.10
  11   9  -2  -37.30   37.50
  11   9  -2  -47.40   37.60
 -10  -9   2   44.20   23.60
 -10  -9   2    8.60   27.00
 -10  -9   2   44.10   23.00
 -10   9   2   -2.30   18.20
  10   9  -2   40.60   55.09
  10   9  -2   36.80   55.09
  -9  -9   2    6.10   20.40
  -9  -9   2   11.90   17.10
  -9  -9   2   11.90   17.50
   9   9  -2   44.20   45.00
   9   9  -2   42.60   45.10
   9   9  -2  -12.20   21.00
  -9   9   2   -5.90   14.90
   9   9  -2  -12.20   20.40
  -8  -9   2   88.59   32.90
  -8  -9   2   82.29   20.90
  -8  -9   2   82.39   21.40
   8   9  -2   63.39   26.50
   8   9  -2   86.49   55.69
  -8   9   2   64.29   21.10
   8   9  -2   62.89   25.80
   8   9  -2   92.39   55.69
  -7  -9   2   21.50   18.10
  -7  -9   2   15.40   20.50
  -7  -9   2   21.40   17.60
  -7   9   2    8.60    3.90
  -7   9   2   18.00    9.90
   7   9  -2   27.70   16.80
  -7   9   2   17.20    7.20
  -7   9   2   17.10    7.30
   7   9  -2  -16.60   36.10
  -7   9   2    8.50    3.80
   7   9  -2   28.00   17.30
   7   9  -2  -13.60   36.10
  -6  -9   2   74.99   39.50
  -6  -9   2  110.79   27.30
  -6  -9   2   80.59   25.80
  -6  -9   2  110.69   26.70
  -6   9   2   35.30   19.40
  -6   9   2   77.09   13.50
   6   9  -2  102.49   31.20
   6   9  -2   68.69   36.70
   6   9  -2   70.59   36.70
  -6   9   2   99.69   21.00
  -6   9   2   77.49   13.90
   6   9  -2  102.29   30.40
  -6   9   2   35.70   19.20
  -5  -9   2  134.69   35.70
  -5  -9   2  127.29   33.30
  -5  -9   2  104.79   45.90
  -5  -9   2  127.09   32.50
  -5   9   2  139.19   21.50
   5   9  -2   86.99   44.20
   5   9  -2  163.48   36.60
  -5   9   2  196.58   21.30
   5   9  -2   87.29   44.30
   5   9  -2  163.78   37.50
  -5   9   2  144.79   30.50
  -5   9   2  143.29   30.90
  -5   9   2  195.68   20.80
   5   9  -2  148.39   35.60
  -4  -9   2  154.38   33.00
  -4  -9   2  238.38   58.79
  -4  -9   2  241.28   42.60
  -4  -9   2  241.58   43.60
   4   9  -2  158.48   48.20
  -4   9   2  176.28   41.00
  -4   9   2  233.08   20.40
  -4   9   2  208.68   20.10
  -4   9   2  237.48   26.80
   4   9  -2  224.38   40.90
   4   9  -2  230.78   40.70
   4   9  -2  156.18   48.40
  -4   9   2  173.68   41.30
  -4   9   2  236.38   26.20
   4   9  -2  224.68   41.80
  -3  -9   2  697.63   66.09
   3  -9  -2  614.44   52.29
  -3  -9   2  582.44   57.29
  -3  -9   2  696.83   64.89
  -3  -9   2  641.84  101.89
   3  -9  -2  614.94   52.99
   3   9  -2  558.94   59.99
   3   9  -2  603.04  101.59
  -3   9   2  599.24   51.99
   3   9  -2  615.44  100.99
   3   9  -2  626.24   58.99
  -3   9   2  596.64   51.09
   3   9  -2  558.74   59.09
  -3   9   2  511.65   76.09
  -3   9   2  520.45   76.09
  -2  -9   2 1241.08   94.19
  -2  -9   2 1322.67  132.49
   2   9  -2 1304.97  126.69
   2   9  -2 1285.67  127.39
  -2   9   2 1150.68   88.39
  -2   9   2 1213.78  112.09
  -2   9   2 1145.39   87.29
   2   9  -2 1314.17   94.59
   2   9  -2 1179.38   97.39
   2   9  -2 1179.28   96.19
   1  -9  -2  341.37   39.00
  -1  -9   2  281.77   40.90
   1  -9  -2  341.27   38.30
  -1  -9   2  368.16   72.89
  -1   9   2  263.57   56.49
   1   9  -2  297.47   44.90
  -1   9   2  320.67   37.80
  -1   9   2  322.37   38.60
   1   9  -2  327.57   70.49
   1   9  -2  323.47   71.19
   1   9  -2  297.67   45.80
   1   9  -2  329.07   45.40
   0  -9   2 1420.36  132.89
   0  -9  -2 1334.37  101.79
   0  -9  -2 1365.46   84.09
   0  -9   2 1434.36   98.19
   0  -9  -2 1333.77  100.69
   0   9  -2 1395.16  133.39
   0   9  -2 1379.96  103.39
   0   9   2 1287.77  100.49
   0   9  -2 1379.06  102.19
   0   9  -2 1217.28   96.59
   0   9   2 1407.26  130.39
   0   9  -2 1411.06  132.29
   0   9   2 1294.77  101.89
   1  -9   2  643.44   94.89
  -1  -9  -2  574.54   47.60
  -1  -9  -2  653.23   61.89
   1  -9   2  631.14   95.09
   1  -9   2  645.94   55.19
  -1  -9  -2  652.73   60.79
   1   9   2  584.44   97.09
   1   9   2  668.73   62.79
  -1   9  -2  556.54   55.99
  -1   9  -2  594.64   56.19
  -1   9  -2  557.04   56.89
  -1   9  -2  577.74   90.59
  -1   9  -2  571.94   91.69
   1   9   2  664.73   61.49
  -2  -9  -2  525.75   56.89
  -2  -9  -2  528.75   47.50
  -2  -9  -2  525.25   55.89
   2  -9   2  568.54   83.09
   2  -9   2  554.34   83.49
   2   9   2  446.96   54.29
   2   9   2  589.44   98.79
  -2   9  -2  561.64   53.59
  -2   9  -2  594.24   55.39
  -2   9  -2  674.33   96.89
   2   9   2  444.06   53.19
  -2   9  -2  667.03   97.89
  -2   9  -2  562.24   54.59
  -3  -9  -2  381.06   43.40
   3  -9   2  409.66   76.89
   3  -9   2  403.06   77.39
  -3  -9  -2  465.95   54.09
  -3  -9  -2  466.55   55.19
  -3   9  -2  338.37   68.59
   3   9   2  412.36   90.49
  -3   9  -2  445.06   48.70
  -3   9  -2  334.37   69.29
   3   9   2  484.05   67.29
   3   9   2  480.35   65.49
   4  -9   2  265.47   62.69
  -4  -9  -2  200.98   40.80
  -4  -9  -2  201.28   41.80
  -4  -9  -2  264.37   43.80
   4  -9   2  269.27   62.19
  -4   9  -2  238.88   43.60
  -4   9  -2  164.18   50.29
  -4   9  -2  166.48   49.80
   4   9   2  223.68   45.20
   4   9   2  205.28   62.29
   4   9   2  221.88   43.90
  -5  -9  -2  201.98   42.40
  -5  -9  -2  160.58   38.20
  -5  -9  -2  202.28   43.40
   5  -9   2  238.88   63.39
   5  -9   2  242.08   62.79
  -5   9  -2  246.88   59.39
   5   9   2  233.28   65.99
  -5   9  -2  249.97   58.79
   5   9   2  146.69   37.70
   5   9   2  145.49   36.60
  -5   9  -2  185.98   38.40
  -6  -9  -2   15.10   20.60
   6  -9   2   92.99   42.10
   6  -9   2   91.89   42.60
  -6  -9  -2   10.60   19.30
  -6  -9  -2   10.60   19.80
  -6   9  -2   23.50   19.00
  -6   9  -2   48.30   24.10
   6   9   2   64.29   29.70
   6   9   2   64.79   30.70
  -6   9  -2   48.80   23.80
   6   9   2   47.60   45.40
  -7  -9  -2   53.19   21.50
   7  -9   2   46.20   30.40
  -7  -9  -2   80.59   26.90
   7  -9   2   46.80   30.10
  -7  -9  -2   53.09   21.00
   7   9   2   48.60   23.60
  -7   9  -2   45.00   28.60
  -7   9  -2   44.70   29.10
   7   9   2   40.90   43.40
  -7   9  -2   58.29   28.10
   7   9   2   48.30   22.90
  -8  -9  -2  -20.00   24.30
  -8  -9  -2    0.30   21.10
  -8  -9  -2    0.20   20.60
  -8   9  -2   -4.30   19.10
   8   9   2   -4.70   43.10
  -8   9  -2   -4.30   18.70
  -8   9  -2  -20.30   25.00
   8   9   2  -18.90   26.00
   8   9   2  -18.80   25.30
  -9  -9  -2   -4.60   23.30
  -9  -9  -2   -4.60   23.90
  -9  -9  -2   12.10   27.20
  -9   9  -2    0.80   20.80
  -9   9  -2  -28.80   31.00
  -9   9  -2    0.80   21.40
   9   9   2  -29.40   46.40
 -10  -9  -2  -23.90   24.10
 -10  -9  -2  -23.80   23.60
 -10  -9  -2   38.00   38.50
 -10   9  -2    6.90   19.80
 -10   9  -2    6.80   19.20
  10   9   2  -45.40   59.49
 -11 -10   2   78.99   41.50
 -11 -10   2   92.59   31.00
 -11 -10   2   92.79   31.80
 -11  10   2   82.09   33.00
  11  10  -2  -10.70   57.39
  11  10  -2  -14.10   57.29
 -10 -10   2   50.49   20.70
 -10 -10   2  144.09   51.69
 -10 -10   2   50.49   20.20
  10  10  -2   31.70   49.00
  10  10  -2   23.10   49.00
 -10  10   2   49.40   22.10
  -9 -10   2   83.39   29.10
  -9 -10   2  151.18   46.50
  -9 -10   2   83.29   28.50
  -9  10   2   76.89   25.80
   9  10  -2  150.88   40.20
   9  10  -2   60.99   45.80
   9  10  -2  151.68   41.40
   9  10  -2   63.49   45.90
  -8 -10   2   38.20   23.80
  -8 -10   2   38.40   23.30
  -8 -10   2   67.19   29.10
   8  10  -2   31.10   22.30
   8  10  -2    8.90   34.40
   8  10  -2   31.10   21.70
   8  10  -2    4.00   34.40
  -8  10   2   21.70   15.90
  -7 -10   2   69.79   28.50
  -7 -10   2   72.99   23.00
  -7 -10   2   72.89   22.50
  -7  10   2   88.99   20.30
  -7  10   2   88.69   13.30
  -7  10   2   87.99   13.00
   7  10  -2   44.90   41.60
  -7  10   2   50.79   17.80
   7  10  -2   48.30   41.70
   7  10  -2  163.28   36.60
  -7  10   2   51.49   17.60
   7  10  -2  163.88   37.60
  -6 -10   2  154.38   36.20
  -6 -10   2  154.28   35.30
  -6 -10   2  151.58   59.89
  -6 -10   2   99.49   32.00
  -6  10   2   99.09   16.40
   6  10  -2  211.98   42.80
   6  10  -2  212.58   43.90
  -6  10   2  150.88   23.60
  -6  10   2   79.69   28.10
   6  10  -2  126.49   54.19
  -6  10   2   80.59   27.80
  -6  10   2   99.59   16.80
   6  10  -2  128.49   54.29
  -5 -10   2  338.27   80.79
  -5 -10   2  242.68   47.50
  -5 -10   2  304.17   51.69
  -5 -10   2  304.57   52.79
  -5  10   2  371.36   56.69
   5  10  -2  306.97   73.19
   5  10  -2  344.67   56.79
  -5  10   2  365.46   34.50
   5  10  -2  356.26   55.39
  -5  10   2  367.46   31.30
  -5  10   2  315.87   31.50
  -5  10   2  367.46   57.29
   5  10  -2  307.77   72.99
   5  10  -2  343.97   55.49
  -5  10   2  367.16   35.10
  -4 -10   2  393.56   58.29
  -4 -10   2  392.86   56.99
  -4 -10   2  349.77   52.49
  -4 -10   2  371.16   80.39
  -4  10   2  268.07   22.90
  -4  10   2  288.97   24.10
  -4  10   2  292.37   32.50
   4  10  -2  292.87   46.90
   4  10  -2  301.47   71.19
   4  10  -2  325.37   54.29
   4  10  -2  325.17   53.19
  -4  10   2  328.27   57.29
  -4  10   2  293.57   33.10
  -4  10   2  332.97   56.89
   4  10  -2  306.47   70.79
  -3 -10   2  254.07   43.50
  -3 -10   2  157.58   33.30
  -3 -10   2  254.37   44.60
  -3 -10   2  348.47   79.99
   3 -10  -2  140.69   27.90
   3 -10  -2  140.89   28.60
  -3  10   2  220.48   46.80
  -3  10   2  216.78   46.90
   3  10  -2  169.28   53.59
   3  10  -2  251.67   40.10
  -3  10   2  151.28   27.10
   3  10  -2  191.18   38.50
   3  10  -2  191.28   39.40
   3  10  -2  169.98   53.19
  -3  10   2  151.98   27.80
  -2 -10   2  -11.80   26.50
  -2 -10   2   18.50   12.90
  -2  10   2   35.10   22.40
  -2  10   2    8.60   11.90
   2  10  -2   19.30   17.60
   2  10  -2  -29.20   17.30
  -2  10   2    8.60   12.20
   2  10  -2   19.30   17.20
   2  10  -2   28.40   13.80
   2  10  -2  -28.80   17.40
  -1 -10   2  223.08   37.50
   1 -10  -2  197.18   35.00
  -1 -10   2  155.98   49.60
   1 -10  -2  197.38   35.80
   1  10  -2  201.28   35.20
  -1  10   2  145.89   42.60
  -1  10   2  214.28   35.90
   1  10  -2  198.28   39.00
   1  10  -2  198.18   38.10
   1  10  -2  252.07   60.69
   1  10  -2  255.27   60.09
  -1  10   2  215.38   36.80
   0 -10   2  111.59   42.30
   0 -10  -2   96.29   15.80
   0 -10  -2   71.89   20.00
   0 -10  -2   71.89   20.40
   0 -10   2   96.59   22.20
   0  10  -2  126.09   46.60
   0  10  -2  102.19   26.80
   0  10   2   98.79   25.20
   0  10   2  141.39   47.20
   0  10  -2  102.29   27.50
   0  10  -2  124.69   47.10
   0  10   2   99.29   25.90
   0  10  -2   80.89   20.20
  -1 -10  -2  134.89   30.10
   1 -10   2  113.19   41.40
  -1 -10  -2  113.09   21.10
  -1 -10  -2  133.89   30.80
   1 -10   2  141.89   26.50
  -1  10  -2  120.89   28.00
  -1  10  -2  105.79   26.00
   1  10   2  117.99   30.50
  -1  10  -2  107.89   44.00
   1  10   2  117.29   29.70
  -1  10  -2  120.79   27.40
   1  10   2  140.29   51.79
  -1  10  -2  106.79   44.50
   2 -10   2   16.50   32.20
  -2 -10  -2   12.20   14.00
   2 -10   2   17.50   32.10
  -2 -10  -2   12.20   13.70
  -2 -10  -2   11.40   12.20
  -2  10  -2   20.10   25.50
  -2  10  -2   19.40   14.10
   2  10   2    2.70   15.40
   2  10   2    2.80   15.90
  -2  10  -2   28.70   16.00
  -2  10  -2   20.40   25.20
   2  10   2  -20.10   26.00
  -2  10  -2   28.70   15.60
  -3 -10  -2   94.19   24.70
   3 -10   2  150.08   49.30
   3 -10   2  150.68   49.10
  -3 -10  -2   80.19   24.90
  -3 -10  -2   80.09   24.30
  -3  10  -2  106.99   28.00
  -3  10  -2   71.79   30.70
   3  10   2   96.69   29.60
   3  10   2   95.99   28.70
  -3  10  -2  107.99   24.70
  -3  10  -2   70.89   31.10
  -3  10  -2  108.09   25.30
   3  10   2   89.09   43.80
   4 -10   2   91.49   41.20
  -4 -10  -2   60.59   27.50
   4 -10   2   91.99   40.90
  -4 -10  -2  134.69   32.60
  -4 -10  -2   60.59   26.90
  -4  10  -2   84.59   40.20
  -4  10  -2   70.79   23.60
  -4  10  -2   85.69   39.80
  -4  10  -2   96.69   29.80
  -4  10  -2   70.89   24.20
   4  10   2  104.89   31.10
   4  10   2   96.89   49.80
   4  10   2  104.09   30.20
   5 -10   2  156.18   50.79
  -5 -10  -2  174.98   36.20
  -5 -10  -2  127.89   36.40
   5 -10   2  158.08   50.39
  -5 -10  -2  127.99   37.30
   5  10   2  132.19   37.00
  -5  10  -2  126.19   32.90
   5  10   2  133.99   62.09
  -5  10  -2  101.89   37.70
   5  10   2  133.29   38.10
  -5  10  -2  100.69   38.10
   6 -10   2  -36.70   35.20
   6 -10   2  -36.10   35.50
  -6 -10  -2   73.59   29.10
  -6 -10  -2   73.49   28.40
  -6 -10  -2   23.00   15.10
   6  10   2   38.30   18.90
   6  10   2   13.40   27.40
   6  10   2   38.60   19.50
  -6  10  -2   55.49   29.20
  -6  10  -2   34.00   21.50
  -6  10  -2   54.89   29.50
  -7 -10  -2  285.17   56.39
  -7 -10  -2  291.97   58.39
  -7 -10  -2  291.67   57.09
  -7  10  -2  207.58   55.59
  -7  10  -2  259.57   51.99
   7  10   2  227.38   68.99
  -7  10  -2  209.08   54.79
   7  10   2  222.78   51.99
   7  10   2  220.98   50.49
  -8 -10  -2   98.89   34.90
  -8 -10  -2   98.99   35.70
  -8 -10  -2  156.48   39.60
  -8  10  -2   13.80   27.10
   8  10   2   97.49   33.30
  -8  10  -2  119.79   38.90
  -8  10  -2   13.70   27.60
   8  10   2   33.60   40.40
   8  10   2   98.09   34.20
  -9 -10  -2    4.60   23.10
  -9 -10  -2   42.80   37.80
  -9 -10  -2    4.60   23.60
  -9  10  -2   83.79   34.20
  -9  10  -2   64.49   36.10
  -9  10  -2   83.99   35.10
   9  10   2 -127.89   40.30
 -10 -10  -2    4.60   34.20
 -10 -10  -2   -4.20   33.20
 -10 -10  -2   -4.00   32.40
 -10  10  -2   16.60   25.20
  10  10   2  -38.00   57.79
 -10  10  -2   16.50   24.40
 -11 -11   2   18.10   17.10
 -11 -11   2    6.70   36.80
 -11 -11   2   18.10   17.50
  11  11  -2    7.50   55.89
  11  11  -2    1.20   55.59
 -11  11   2  -35.80   21.40
 -10 -11   2  -34.40   33.20
 -10 -11   2    1.80   24.40
 -10 -11   2    1.80   25.00
  10  11  -2   17.70   57.39
 -10  11   2  -21.80   18.90
  10  11  -2   20.20   57.39
  -9 -11   2   25.60   22.80
  -9 -11   2   22.80   26.30
  -9 -11   2   22.80   25.60
   9  11  -2    5.30   20.60
  -9  11   2   -5.90   13.50
   9  11  -2  -86.59   63.79
   9  11  -2  -85.29   63.59
   9  11  -2    5.10   21.20
  -8 -11   2   28.30   21.80
  -8 -11   2   59.59   27.60
  -8 -11   2   28.20   21.30
  -8  11   2    4.50    2.70
  -8  11   2    8.00   12.50
  -8  11   2    4.50    2.80
  -8  11   2    6.60    4.40
   8  11  -2 -113.39   48.00
   8  11  -2   29.40   18.50
   8  11  -2   29.40   18.00
  -8  11   2    6.60    4.50
   8  11  -2 -114.29   47.90
  -7 -11   2   42.20   26.50
  -7 -11   2   42.20   25.90
  -7 -11   2   18.00   19.10
  -7  11   2   50.59   21.40
  -7  11   2   43.20   16.00
   7  11  -2   46.00   47.20
  -7  11   2   50.29   11.80
   7  11  -2   51.89   47.30
   7  11  -2   22.60   22.60
  -7  11   2   51.39   21.20
   7  11  -2   22.70   23.20
  -7  11   2   49.99   11.50
  -7  11   2   93.39   24.10
  -6 -11   2  149.39   39.70
  -6 -11   2  216.48   64.89
  -6 -11   2  181.48   40.00
  -6 -11   2  181.68   40.90
  -6  11   2  196.78   30.10
   6  11  -2  221.08   73.19
   6  11  -2  217.78   73.39
  -6  11   2  133.69   36.40
   6  11  -2  187.68   44.50
  -6  11   2  160.78   24.60
  -6  11   2  161.68   25.20
   6  11  -2  188.48   45.60
  -6  11   2  135.09   36.00
  -6  11   2  200.38   28.30
  -5 -11   2  167.88   37.80
  -5 -11   2  168.08   38.70
  -5 -11   2  195.18   41.40
  -5 -11   2  128.29   64.69
  -5  11   2  145.19   19.80
  -5  11   2  110.49   35.20
  -5  11   2  109.49   35.60
  -5  11   2   93.29   19.60
   5  11  -2   89.09   41.80
  -5  11   2  100.19   18.10
   5  11  -2  124.59   29.90
   5  11  -2   88.69   29.30
   5  11  -2   88.09   41.70
  -5  11   2   93.69   20.10
   5  11  -2   88.89   30.00
  -4 -11   2  468.55   66.09
  -4 -11   2  469.25   67.59
  -4 -11   2  419.56   95.19
  -4 -11   2  376.16   57.59
  -4  11   2  397.26   67.99
   4  11  -2  317.27   75.79
  -4  11   2  402.76   67.49
  -4  11   2  336.57   24.70
  -4  11   2  360.26   24.40
   4  11  -2  350.36   54.59
   4  11  -2  350.96   55.79
  -4  11   2  335.67   38.70
  -4  11   2  337.07   39.50
   4  11  -2  311.17   76.09
   4  11  -2  461.55   60.69
  -3 -11   2  473.15   55.89
   3 -11  -2  622.14   56.89
   3 -11  -2  621.94   57.79
  -3 -11   2  617.34   64.99
  -3 -11   2  667.23  111.39
  -3 -11   2  618.04   66.19
   3  11  -2  472.45   95.09
   3  11  -2  686.13   63.09
  -3  11   2  536.35   85.29
  -3  11   2  525.65   85.59
   3  11  -2  631.24   66.69
  -3  11   2  557.04   54.39
  -3  11   2  554.64   53.39
   3  11  -2  464.05   95.69
   3  11  -2  631.34   67.99
  -2 -11   2  623.14  110.49
  -2 -11   2  395.36   46.30
   2  11  -2  531.05   96.39
   2  11  -2  417.76   62.09
   2  11  -2  386.96   45.90
  -2  11   2  403.06   47.20
   2  11  -2  417.56   60.89
  -2  11   2  401.16   46.20
  -2  11   2  414.76   75.39
   2  11  -2  523.55   97.19
  -1 -11   2  481.85   51.59
  -1 -11   2  725.63  115.89
   1 -11  -2  553.14   56.99
   1 -11  -2  552.84   55.99
  -1  11   2  556.94   95.39
  -1  11   2  494.15   54.09
   1  11  -2  530.75   53.39
   1  11  -2  525.25   96.69
   1  11  -2  529.75   59.49
   1  11  -2  529.75   58.39
  -1  11   2  496.55   55.29
   1  11  -2  531.85   95.69
   0 -11   2  698.03  111.69
   0 -11   2  650.73   60.59
   0 -11  -2  735.73   68.69
   0 -11  -2  644.94   49.50
   0 -11  -2  735.73   69.79
   0  11  -2  729.23   70.19
   0  11  -2  922.51  130.19
   0  11  -2  646.34   63.59
   0  11  -2  729.03   69.09
   0  11   2  727.23   69.69
   0  11   2  731.03   71.09
   0  11  -2  932.81  128.79
   0  11   2  780.02  117.29
  -1 -11  -2  205.48   30.90
   1 -11   2  199.68   60.89
   1 -11   2  232.38   35.70
  -1 -11  -2  285.67   45.70
  -1 -11  -2  285.67   46.70
  -1  11  -2  210.48   39.30
  -1  11  -2  191.88   36.70
  -1  11  -2  199.98   60.59
   1  11   2  276.17   46.00
  -1  11  -2  210.28   38.50
   1  11   2  229.98   61.09
   1  11   2  277.87   47.30
  -1  11  -2  201.98   59.79
  -2 -11  -2  186.98   40.80
   2 -11   2   82.29   43.90
  -2 -11  -2  207.48   33.40
  -2 -11  -2  186.88   39.90
   2  11   2  157.78   48.90
   2  11   2  201.68   45.20
  -2  11  -2  152.58   34.00
  -2  11  -2  108.89   44.20
  -2  11  -2  238.08   41.40
  -2  11  -2  237.88   40.50
  -2  11  -2  107.79   44.70
   2  11   2  200.48   44.00
  -3 -11  -2  321.77   55.09
  -3 -11  -2  270.87   44.20
   3 -11   2  496.05   87.69
   3 -11   2  490.25   87.79
  -3 -11  -2  321.97   56.19
  -3  11  -2  296.87   72.79
  -3  11  -2  428.36   47.00
  -3  11  -2  428.86   48.00
  -3  11  -2  289.87   47.90
  -3  11  -2  300.27   71.99
   3  11   2  424.46   66.19
   3  11   2  420.36   96.69
   3  11   2  421.56   64.49
  -4 -11  -2   60.49   21.70
  -4 -11  -2   20.20   17.00
   4 -11   2    9.00   24.50
   4 -11   2    3.70   24.50
  -4 -11  -2   20.20   17.40
  -4  11  -2   44.60   21.90
   4  11   2   74.79   26.50
  -4  11  -2   33.10   21.50
   4  11   2   87.49   42.20
   4  11   2   74.19   25.70
  -4  11  -2    4.00   21.80
  -4  11  -2    3.90   22.00
  -4  11  -2   44.60   21.40
   5 -11   2   35.80   38.30
  -5 -11  -2   26.00   17.40
   5 -11   2   32.70   38.20
  -5 -11  -2   43.00   22.00
  -5 -11  -2   26.00   17.00
  -5  11  -2   14.00   21.10
   5  11   2  125.59   55.59
   5  11   2   28.80   20.20
  -5  11  -2   19.60   18.90
  -5  11  -2   72.69   38.80
  -5  11  -2   73.59   38.40
   5  11   2   28.50   19.50
  -5  11  -2   19.70   19.40
  -6 -11  -2   70.79   25.10
   6 -11   2   38.50   47.00
   6 -11   2   37.50   47.20
  -6 -11  -2   70.99   25.70
  -6 -11  -2   89.69   30.70
   6  11   2   84.39   49.90
  -6  11  -2  123.19   27.30
  -6  11  -2   64.29   29.60
  -6  11  -2  104.59   42.20
   6  11   2   41.60   25.70
   6  11   2   41.90   26.50
  -6  11  -2  123.39   27.90
  -6  11  -2  103.29   42.60
  -7 -11  -2    7.20   21.80
   7 -11   2  -53.99   27.70
  -7 -11  -2   16.90   26.30
   7 -11   2  -47.30   27.80
  -7 -11  -2    7.30   22.30
  -7  11  -2   11.50   23.50
   7  11   2   -8.50   18.10
  -7  11  -2   11.40   23.90
   7  11   2   -8.50   18.60
   7  11   2   -4.60   49.60
  -7  11  -2   19.90   20.00
  -7  11  -2   19.90   19.50
  -7  11  -2   45.10   28.90
  -8 -11  -2    7.00   18.40
  -8 -11  -2  -11.40   29.10
  -8 -11  -2    6.90   18.80
  -8  11  -2   32.10   25.70
  -8  11  -2  -15.00   19.30
   8  11   2  -67.89   31.80
  -8  11  -2   -1.40   28.10
   8  11   2   10.90   33.20
  -8  11  -2  -15.10   19.80
  -8  11  -2   32.30   25.20
   8  11   2   10.80   32.20
  -9 -11  -2  -32.00   28.10
  -9 -11  -2  -32.00   27.40
  -9 -11  -2  -41.90   28.80
   9  11   2  -41.20   54.89
  -9  11  -2   16.40   29.10
  -9  11  -2   29.30   36.20
  -9  11  -2  -10.00   24.40
  -9  11  -2  -10.00   23.80
  -9  11  -2   16.40   28.50
 -10 -12   2   49.50   24.40
 -10 -12   2   49.30   40.20
 -10 -12   2   49.50   23.90
 -10  12   2   32.80   22.80
  10  12  -2   14.70   50.09
  10  12  -2   14.70   50.29
  -9 -12   2   75.29   21.90
  -9 -12   2   75.29   21.30
  -9 -12   2  -11.90   26.20
   9  12  -2   14.40   50.79
  -9  12   2    8.80   16.00
   9  12  -2   13.80   50.69
  -8 -12   2   96.69   32.30
  -8 -12   2  113.89   34.70
  -8 -12   2  113.79   33.90
   8  12  -2   68.29   31.80
   8  12  -2   67.79   31.00
  -8  12   2   67.79   19.80
   8  12  -2   -0.60   40.50
  -8  12   2   81.59   18.00
  -8  12   2   78.89   12.90
   8  12  -2   -1.60   40.40
  -8  12   2   82.29   17.70
  -8  12   2   79.89   13.20
  -8  12   2   89.09   28.20
  -7 -12   2   84.89   32.00
  -7 -12   2   68.59   26.50
  -7 -12   2   68.69   27.10
   7  12  -2  102.19   56.09
   7  12  -2   99.89   55.99
   7  12  -2  106.59   34.50
  -7  12   2  136.09   21.70
   7  12  -2  106.99   35.50
  -7  12   2   87.69   27.10
  -7  12   2   86.39   27.30
  -7  12   2  133.49   25.70
  -7  12   2  136.89   22.30
  -7  12   2  137.19   25.40
  -6 -12   2   93.69   34.20
  -6 -12   2  172.48   41.90
  -6 -12   2  190.28   67.99
  -6 -12   2  172.58   42.90
  -6  12   2  105.79   35.20
   6  12  -2  148.09   40.60
  -6  12   2  149.79   25.20
   6  12  -2  266.77   84.49
  -6  12   2  136.99   22.50
  -6  12   2  155.48   26.30
   6  12  -2  261.27   84.79
   6  12  -2  147.69   39.60
  -6  12   2  106.89   34.80
  -6  12   2  156.28   27.00
  -5 -12   2   62.39   33.50
  -5 -12   2  157.88   38.80
  -5 -12   2  158.18   39.70
  -5 -12   2  149.19   35.80
  -5  12   2  144.29   42.90
  -5  12   2  128.89   19.10
  -5  12   2  148.89   27.50
   5  12  -2  114.99   34.20
   5  12  -2   75.79   39.80
   5  12  -2  115.29   35.00
  -5  12   2  142.69   43.40
   5  12  -2   75.59   39.60
   5  12  -2  116.59   32.20
  -5  12   2  155.18   19.70
  -5  12   2  149.69   28.20
  -4 -12   2  130.29   34.50
  -4 -12   2  130.59   35.30
  -4 -12   2  186.18   54.29
  -4 -12   2  133.49   33.60
   4  12  -2   87.39   47.00
   4  12  -2  133.69   38.10
  -4  12   2  107.59   24.90
  -4  12   2  101.99   37.90
   4  12  -2   86.79   47.20
   4  12  -2  133.49   37.20
  -4  12   2  103.39   37.60
   4  12  -2  114.89   31.60
  -4  12   2  108.09   25.60
   3 -12  -2  477.15   50.29
  -3 -12   2  354.56   89.79
  -3 -12   2  448.66   52.99
   3 -12  -2  477.65   51.19
  -3  12   2  498.15   50.39
  -3  12   2  495.85   49.40
   3  12  -2  391.46   86.19
  -3  12   2  460.25   83.49
   3  12  -2  483.35   70.69
   3  12  -2  385.36   86.79
  -3  12   2  450.15   83.89
   3  12  -2  419.26   59.59
   3  12  -2  482.85   69.19
  -2 -12   2  261.67   43.10
   2 -12  -2  195.68   40.10
   2 -12  -2  195.48   39.20
  -2 -12   2  345.27   85.79
  -2  12   2  200.78   36.60
   2  12  -2  235.18   48.40
   2  12  -2  259.47   70.89
   2  12  -2  235.38   49.50
  -2  12   2  230.68   57.79
  -2  12   2  201.78   37.50
  -2  12   2  226.58   57.79
   2  12  -2  293.27   44.40
   2  12  -2  263.27   70.39
   1 -12  -2   80.79   25.80
   1 -12  -2   80.69   25.20
  -1 -12   2  154.58   53.79
  -1 -12   2   89.49   24.60
  -1  12   2   57.49   37.90
   1  12  -2   80.79   24.00
   1  12  -2   80.79   24.60
   1  12  -2  119.49   41.30
  -1  12   2   79.49   22.50
  -1  12   2   79.09   21.90
   1  12  -2  120.99   40.90
   1  12  -2   95.49   25.60
   0 -12   2  113.79   52.49
   0 -12   2   90.59   24.30
   0 -12  -2   42.40   19.60
   0 -12  -2   59.19   12.80
   0 -12  -2   42.40   19.10
   0  12  -2   71.89   24.20
   0  12   2   92.69   45.70
   0  12  -2   71.89   24.70
   0  12  -2  119.29   52.99
   0  12  -2   58.99   23.30
   0  12   2  109.59   31.60
   0  12  -2  120.59   52.29
   0  12   2  108.99   30.80
   1 -12   2  -11.80   32.80
  -1 -12  -2   -9.30   14.90
  -1 -12  -2   -9.50   14.60
   1 -12   2  -12.60    9.50
  -1 -12  -2    7.20   10.70
  -1  12  -2  -11.90   13.00
  -1  12  -2  -26.30   10.90
   1  12   2   -8.60   10.00
  -1  12  -2   -9.90   29.20
  -1  12  -2  -10.00   28.80
   1  12   2   39.20   31.70
  -1  12  -2  -26.30   11.20
   1  12   2   -8.60    9.70
  -2 -12  -2  149.79   29.90
  -2 -12  -2   74.69   26.40
  -2 -12  -2   74.59   27.00
   2 -12   2  131.09   59.19
  -2  12  -2   68.59   38.40
   2  12   2  135.99   34.70
  -2  12  -2   75.59   25.10
  -2  12  -2  167.98   33.50
  -2  12  -2   67.89   38.90
   2  12   2    1.80   31.20
   2  12   2  135.09   33.70
  -2  12  -2  168.18   34.30
  -3 -12  -2   49.10   18.10
  -3 -12  -2   29.30   16.00
   3 -12   2   43.60   40.70
  -3 -12  -2   29.30   15.60
   3  12   2   69.89   42.50
   3  12   2   64.69   30.10
   3  12   2   65.09   31.00
  -3  12  -2   45.50   19.50
  -3  12  -2  -13.90   23.20
  -3  12  -2   41.30   21.50
  -3  12  -2  -13.70   23.40
  -3  12  -2   41.30   21.00
  -4 -12  -2   24.10   21.00
  -4 -12  -2   24.10   21.50
  -4 -12  -2   18.40   17.40
  -4  12  -2  -10.20   16.50
   4  12   2    1.10   22.70
  -4  12  -2   10.40   15.20
   4  12   2    1.30   23.40
  -4  12  -2  -21.20   28.80
  -4  12  -2  -20.90   29.10
   4  12   2   38.30   36.80
  -4  12  -2   10.40   15.50
   5 -12   2  280.47   66.89
   5 -12   2  275.37   66.89
  -5 -12  -2  218.18   47.40
  -5 -12  -2  179.98   41.20
  -5 -12  -2  180.08   42.10
  -5  12  -2  249.88   60.19
  -5  12  -2  158.88   38.90
  -5  12  -2  284.17   46.90
  -5  12  -2  284.47   47.90
   5  12   2  226.58   46.80
   5  12   2  184.28   61.89
  -5  12  -2  246.78   60.79
   5  12   2  228.38   48.20
  -6 -12  -2  101.49   32.30
  -6 -12  -2  101.59   33.10
  -6 -12  -2   15.60   23.40
  -6  12  -2  -17.40   27.70
  -6  12  -2   42.60   25.60
   6  12   2   44.50   28.20
   6  12   2   44.10   27.30
   6  12   2   98.99   48.90
  -6  12  -2   39.40   26.20
  -6  12  -2  -17.60   27.40
  -6  12  -2   42.50   25.00
  -7 -12  -2   37.30   28.20
  -7 -12  -2   47.10   29.50
  -7 -12  -2   47.10   30.20
  -7  12  -2   28.20   19.50
   7  12   2   90.99   36.30
  -7  12  -2   49.99   33.20
   7  12   2    2.90   51.69
  -7  12  -2   28.20   19.90
  -7  12  -2   49.60   33.60
   7  12   2   90.29   35.20
  -7  12  -2   49.90   26.70
  -8 -12  -2   48.50   28.70
  -8 -12  -2   48.40   28.00
  -8 -12  -2   49.40   31.70
  -8  12  -2   56.19   30.30
  -8  12  -2   62.29   39.10
   8  12   2    6.00   41.10
  -8  12  -2   56.19   29.60
  -8  12  -2   38.40   33.50
  -8  12  -2   38.60   32.90
  -9 -12  -2   -0.10   38.80
  -9 -12  -2   -0.20   37.90
  -9 -12  -2  -47.30   28.50
  -9  12  -2  -15.60   29.20
  -9  12  -2   50.19   27.50
  -9  12  -2   78.89   43.50
  -9  12  -2   50.09   26.80
  -9  12  -2  -15.60   28.50
   9  12   2   96.99   70.19
 -10 -13   2   35.70   32.60
 -10 -13   2   35.80   33.50
 -10 -13   2   24.80   34.90
  10  13  -2  -37.20   82.69
 -10  13   2    5.40   22.00
  10  13  -2  -14.40   82.89
 -10  13   2  -20.90   26.80
  -9 -13   2   51.59   35.80
  -9 -13   2   35.80   26.90
  -9 -13   2   35.80   27.60
  -9  13   2  -38.90   14.10
   9  13  -2   -8.50   66.39
   9  13  -2    0.30   66.69
  -9  13   2  -20.50   20.80
  -8 -13   2   -4.00   26.20
  -8 -13   2   -3.20   22.40
  -8 -13   2   -3.20   21.80
  -8  13   2   -7.30   13.40
   8  13  -2  -15.70   21.30
   8  13  -2    1.40   52.59
   8  13  -2  -15.70   22.00
  -8  13   2   -7.20   13.50
  -8  13   2    7.50   15.10
  -8  13   2   17.30   18.00
  -8  13   2    7.10    8.90
  -8  13   2    7.10    9.20
   8  13  -2    8.40   52.79
  -7 -13   2    1.30   28.60
  -7 -13   2  -10.30   22.50
  -7 -13   2  -10.30   23.10
   7  13  -2   13.40   30.80
   7  13  -2   22.00   46.60
  -7  13   2   -3.70   14.50
  -7  13   2  -29.00   17.70
  -7  13   2   19.10   12.40
  -7  13   2  -29.40   17.50
   7  13  -2   18.80   46.80
  -7  13   2   -8.90   10.30
   7  13  -2   13.30   30.00
  -7  13   2   18.90   12.00
  -6 -13   2   30.40   59.59
  -6 -13   2   16.20   19.40
  -6 -13   2   16.20   19.90
  -6 -13   2  113.99   37.70
   6  13  -2   -0.10   26.00
  -6  13   2   79.79   20.20
  -6  13   2   76.49   15.60
   6  13  -2   -0.20   26.70
  -6  13   2   80.19   20.80
  -6  13   2   44.90   15.00
  -6  13   2   50.89   26.60
   6  13  -2   40.60   41.50
   6  13  -2   37.70   41.30
  -6  13   2   50.39   26.90
  -5 -13   2   46.30   23.40
  -5 -13   2   62.09   60.19
  -5 -13   2   46.90   24.50
  -5 -13   2   46.20   22.90
   5  13  -2  -18.70   32.00
   5  13  -2  -13.60   24.70
  -5  13   2   21.30    6.40
  -5  13   2   11.20   28.50
  -5  13   2   30.60   16.70
  -5  13   2   37.10    7.70
   5  13  -2  -13.50   24.10
   5  13  -2  -22.90   32.20
   5  13  -2   42.60   22.80
  -5  13   2   11.30   28.10
  -5  13   2   30.70   17.20
  -4 -13   2  101.29   32.50
  -4 -13   2   80.49   52.59
  -4 -13   2  101.39   33.30
  -4 -13   2  145.19   32.60
  -4  13   2   67.39   20.80
   4  13  -2   45.60   21.10
   4  13  -2   78.19   46.30
  -4  13   2   63.49   24.80
  -4  13   2   66.99   20.20
   4  13  -2   79.19   46.00
   4  13  -2   76.09   30.90
  -4  13   2   62.69   25.00
   4  13  -2   75.89   30.20
   3 -13  -2   64.09   22.90
  -3 -13   2  101.59   27.60
   3 -13  -2   63.99   22.40
  -3 -13   2   34.10   38.80
   3  13  -2   60.49   25.30
  -3  13   2   69.69   37.10
  -3  13   2   58.59   22.10
   3  13  -2   72.59   27.00
   3  13  -2   72.49   26.30
  -3  13   2   70.59   37.30
  -3  13   2   58.69   21.50
   3  13  -2   42.50   32.60
   3  13  -2   41.30   32.90
   2 -13  -2  251.97   44.40
   2 -13  -2  251.67   43.40
  -2 -13   2  186.88   39.10
  -2 -13   2   19.40   55.69
   2  13  -2  178.48   42.60
   2  13  -2  117.29   53.79
   2  13  -2  118.89   53.39
  -2  13   2  201.08   56.89
  -2  13   2  185.98   37.20
   2  13  -2  178.48   43.60
   2  13  -2  231.58   42.60
  -2  13   2  192.08   57.09
  -2  13   2  184.98   36.20
  -1 -13   2  325.77   82.99
   1 -13  -2  393.76   55.69
   1 -13  -2  394.16   56.89
  -1 -13   2  320.67   48.40
  -1  13   2  402.46   58.89
  -1  13   2  446.36   89.09
   1  13  -2  273.17   82.89
  -1  13   2  400.36   57.39
   1  13  -2  294.67   52.89
   1  13  -2  294.87   53.89
   1  13  -2  413.46   46.00
   1  13  -2  276.27   82.09
   0 -13   2   92.39   53.69
   0 -13  -2  115.89   17.80
   0 -13  -2   99.89   28.60
   0 -13   2   99.89   24.80
   0 -13  -2  100.09   29.20
   0  13  -2   52.09   39.60
   0  13   2  109.69   30.20
   0  13  -2   92.09   28.10
   0  13   2   68.09   41.00
   0  13  -2   51.49   40.10
   0  13  -2   86.09   27.20
   0  13   2  109.09   29.40
   0  13  -2   92.09   28.80
  -1 -13  -2  438.36   64.89
   1 -13   2  619.94  114.49
  -1 -13  -2  438.06   63.59
   1 -13   2  430.36   46.90
  -1 -13  -2  430.66   42.10
  -1  13  -2  359.46   56.99
  -1  13  -2  366.56   89.69
  -1  13  -2  359.26   55.89
  -1  13  -2  370.46   88.59
   1  13   2  377.56   88.59
   1  13   2  477.05   66.69
   1  13   2  479.85   68.49
  -1  13  -2  383.06   53.39
  -2 -13  -2  101.09   34.20
  -2 -13  -2  100.99   33.50
   2 -13   2  145.99   53.59
  -2 -13  -2  135.79   26.90
  -2  13  -2  189.68   62.19
  -2  13  -2  126.99   31.50
   2  13   2  132.49   63.19
   2  13   2  132.69   33.40
   2  13   2  131.79   32.50
  -2  13  -2  104.19   29.70
  -2  13  -2  187.68   62.99
  -2  13  -2  104.09   29.10
  -3 -13  -2   95.59   27.00
  -3 -13  -2   47.80   19.40
  -3 -13  -2   47.80   19.90
  -3  13  -2   76.89   29.60
   3  13   2   96.99   35.00
  -3  13  -2   89.99   26.10
  -3  13  -2   59.39   36.30
   3  13   2  152.78   57.79
   3  13   2   96.39   34.00
  -3  13  -2   89.89   25.50
  -3  13  -2   60.09   35.90
  -4 -13  -2  233.68   51.19
  -4 -13  -2  140.79   34.10
  -4 -13  -2  233.68   52.29
  -4  13  -2  188.28   59.39
  -4  13  -2  280.97   48.10
  -4  13  -2  214.58   44.80
   4  13   2  305.17   54.79
   4  13   2  293.27   93.29
   4  13   2  307.57   56.39
  -4  13  -2  280.77   47.10
  -4  13  -2  190.78   58.79
  -5 -13  -2   50.39   23.80
  -5 -13  -2   50.39   24.40
  -5 -13  -2   61.49   30.10
   5  13   2  138.99   42.10
  -5  13  -2  107.19   33.10
  -5  13  -2    7.40   31.00
  -5  13  -2  150.08   34.40
  -5  13  -2  150.18   35.20
   5  13   2  137.89   40.90
  -5  13  -2    7.50   30.60
   5  13   2  126.19   68.89
  -6 -13  -2   -2.60   23.20
  -6 -13  -2  -20.80   19.20
  -6 -13  -2   -2.60   23.80
  -6  13  -2   34.60   31.50
   6  13   2    8.70   23.70
  -6  13  -2   17.10   25.70
   6  13   2    8.70   24.50
  -6  13  -2   25.50   20.60
   6  13   2  105.19   64.29
  -6  13  -2   35.10   31.20
  -6  13  -2   25.50   21.10
  -7 -13  -2   58.79   33.70
  -7 -13  -2   24.30   26.60
  -7 -13  -2   58.79   32.90
   7  13   2   76.09   66.29
   7  13   2   88.99   42.90
  -7  13  -2   55.89   28.80
  -7  13  -2   55.89   28.20
   7  13   2   88.29   41.60
  -7  13  -2   49.80   32.60
  -7  13  -2   49.20   33.00
  -8 -13  -2   10.00   26.90
  -8 -13  -2    9.90   26.30
  -8 -13  -2  -33.20   27.00
  -8  13  -2   24.00   26.70
  -8  13  -2    7.10   33.30
  -8  13  -2   -1.20   30.80
  -8  13  -2   23.90   26.10
   8  13   2   -0.50   39.60
  -8  13  -2   -1.20   31.30
  -9 -14   2   51.99   25.80
  -9 -14   2   52.09   26.40
  -9 -14   2   64.39   32.40
  -9  14   2   36.30   23.30
  -9  14   2   25.70   23.60
   9  14  -2   34.00   58.59
   9  14  -2   24.40   58.89
  -8 -14   2   96.39   32.20
  -8 -14   2   96.59   33.00
  -8 -14   2   68.59   40.10
  -8  14   2   71.99   26.30
   8  14  -2  185.78   52.09
   8  14  -2  186.88   53.59
  -8  14   2  140.49   22.30
  -8  14   2  107.19   26.60
  -8  14   2  101.89   27.90
  -8  14   2  139.39   21.70
   8  14  -2   73.29   60.69
  -8  14   2  100.59   28.20
   8  14  -2   80.19   60.39
  -7 -14   2  224.08   48.00
  -7 -14   2  162.78   45.10
  -7 -14   2  162.48   44.00
  -7  14   2  172.38   29.00
  -7  14   2  123.09   23.00
  -7  14   2   88.79   34.90
  -7  14   2  188.58   30.10
   7  14  -2  129.29   79.39
  -7  14   2   87.69   35.20
   7  14  -2  136.19   44.50
   7  14  -2  141.59   78.99
   7  14  -2  136.79   45.70
  -7  14   2  171.38   28.20
  -6 -14   2   94.99   34.10
  -6 -14   2   79.29   29.80
  -6 -14   2   83.59   57.19
  -6 -14   2   94.89   33.30
   6  14  -2  113.69   33.70
   6  14  -2  113.29   32.80
  -6  14   2   73.89   16.50
  -6  14   2   87.99   15.00
  -6  14   2  102.29   25.90
   6  14  -2  102.69   51.79
  -6  14   2   82.59   35.30
  -6  14   2   83.69   34.80
  -6  14   2  101.69   25.20
   6  14  -2   98.39   52.09
  -5 -14   2   65.89   33.30
  -5 -14   2  110.39   57.89
  -5 -14   2   18.60   17.10
  -5 -14   2   65.79   32.50
  -5  14   2   57.59   20.90
   5  14  -2   41.40   23.40
   5  14  -2   41.70   24.00
   5  14  -2   30.30   48.80
  -5  14   2   58.39   21.40
  -5  14   2   -1.10   23.90
  -5  14   2   -1.10   23.60
   5  14  -2   22.80   49.30
   5  14  -2   58.39   27.20
  -4 -14   2  106.59   71.09
  -4 -14   2  108.19   31.60
   4  14  -2  103.09   33.30
   4  14  -2  114.99   52.79
   4  14  -2  122.39   52.39
  -4  14   2   82.49   35.30
  -4  14   2   82.59   24.60
   4  14  -2   94.79   28.20
  -4  14   2   82.99   25.30
  -4  14   2   83.59   34.90
   4  14  -2  103.29   34.10
  -3 -14   2   13.60   17.50
  -3 -14   2  104.39   51.99
  -3  14   2   78.49   40.80
   3  14  -2    4.40   19.00
  -3  14   2   22.30   16.40
  -3  14   2   77.49   41.10
   3  14  -2    4.40   19.40
   3  14  -2   41.20   19.70
  -3  14   2   22.20   15.90
   3  14  -2    9.40   40.30
   3  14  -2    9.20   40.70
   2 -14  -2   22.50   17.10
  -2 -14   2   22.80   51.79
   2 -14  -2   22.50   17.50
  -2 -14   2   26.10   15.80
  -2  14   2   98.99   42.90
  -2  14   2  107.39   30.40
  -2  14   2  106.89   29.50
   2  14  -2   11.60   23.30
   2  14  -2   49.20   25.90
   2  14  -2   32.50   20.60
   2  14  -2   11.80   23.10
   2  14  -2   49.30   26.60
  -2  14   2   99.49   43.10
   1 -14  -2  244.68   47.60
  -1 -14   2  250.77   40.40
   1 -14  -2  244.38   46.60
  -1 -14   2  252.67   69.69
  -1  14   2  147.09   48.70
  -1  14   2  143.29   48.70
   1  14  -2  205.88   57.79
   1  14  -2  208.48   57.19
   1  14  -2  179.68   40.60
  -1  14   2  241.38   44.90
   1  14  -2  179.38   39.70
  -1  14   2  240.08   43.70
   1  14  -2  264.07   43.80
   0 -14  -2    1.80    6.80
   0 -14   2   14.50   43.90
   0 -14   2   20.50   16.70
   0 -14  -2   34.80   22.20
   0 -14  -2   34.80   22.80
   0  14   2  105.49   52.29
   0  14   2  -17.60   17.70
   0  14  -2   -1.50   25.50
   0  14   2  -17.70   18.20
   0  14  -2   -3.60   17.00
   0  14  -2   -3.60   17.40
   0  14  -2   -8.00   15.40
   0  14  -2   -1.40   25.20
  -1 -14  -2   62.99   25.30
  -1 -14  -2   62.99   25.90
   1 -14   2   71.29   46.40
  -1 -14  -2   69.89   19.70
   1  14   2  153.98   52.49
  -1  14  -2   90.89   31.80
   1  14   2   66.19   32.10
   1  14   2   65.89   31.20
  -1  14  -2   36.40   23.40
  -1  14  -2   90.89   32.50
  -1  14  -2   18.60   38.70
  -1  14  -2   18.30   39.20
   2 -14   2  113.39   50.99
  -2 -14  -2   50.69   24.70
  -2 -14  -2   68.69   21.00
  -2 -14  -2   50.69   25.30
  -2  14  -2   62.29   23.90
  -2  14  -2   64.69   24.70
  -2  14  -2    9.70   32.50
   2  14   2  -17.50   25.60
   2  14   2   49.40   31.70
  -2  14  -2   62.29   23.30
   2  14   2   49.10   30.80
  -2  14  -2    9.60   32.90
  -3 -14  -2   58.59   26.10
  -3 -14  -2   58.49   26.70
  -3 -14  -2   97.99   28.90
  -3  14  -2   61.39   40.10
  -3  14  -2  120.29   37.40
  -3  14  -2  120.19   36.60
   3  14   2  244.68   72.49
  -3  14  -2   60.69   40.60
   3  14   2  113.29   41.30
  -3  14  -2  102.49   26.10
   3  14   2  112.49   40.10
  -4 -14  -2   78.69   30.00
  -4 -14  -2   78.69   29.30
  -4 -14  -2   65.59   25.90
  -4  14  -2  177.58   37.30
  -4  14  -2   70.29   28.30
   4  14   2   43.30   55.59
  -4  14  -2  177.48   36.50
   4  14   2  189.88   45.40
  -4  14  -2   86.89   45.30
   4  14   2  188.28   44.00
  -4  14  -2   87.89   44.80
  -5 -14  -2    0.60   20.40
  -5 -14  -2   55.49   32.00
  -5 -14  -2   55.49   31.30
  -5  14  -2   -5.60   17.80
   5  14   2  -18.20   28.40
  -5  14  -2    1.10   28.70
  -5  14  -2    1.10   28.40
  -5  14  -2   -3.40   25.30
   5  14   2  -18.30   29.20
   5  14   2   -2.20   64.29
  -5  14  -2   -5.60   17.40
  -6 -14  -2   14.60   29.50
  -6 -14  -2   14.70   30.10
  -6 -14  -2    9.70   24.40
   6  14   2   20.00   27.10
  -6  14  -2   13.50   23.30
  -6  14  -2  -46.20   28.90
  -6  14  -2   13.50   22.70
  -6  14  -2  -45.60   29.20
   6  14   2   20.10   28.00
   6  14   2   63.49   64.59
  -6  14  -2   20.00   26.10
  -7 -14  -2   -0.70   28.10
  -7 -14  -2   14.90   31.50
  -7 -14  -2   -0.70   28.80
  -7  14  -2   26.00   27.60
  -7  14  -2   -8.40   36.10
  -7  14  -2    9.80   29.90
  -7  14  -2   26.00   28.30
  -7  14  -2   -8.20   35.70
   7  14   2   10.20   34.50
   7  14   2   10.30   35.60
   7  14   2   66.19   70.99
  -8 -14  -2   -9.80   25.80
  -8 -14  -2   20.50   35.80
  -8 -14  -2   -9.80   26.40
  -8  14  -2   39.70   37.70
   8  14   2   -6.20   54.89
  -8  14  -2   42.50   34.40
  -8  14  -2   42.10   34.90
  -8  14  -2   15.50   28.20
  -8  14  -2   15.40   27.50
  -9 -15   2   72.69   34.70
  -9 -15   2   72.89   35.60
  -9 -15   2    1.10   28.30
   9  15  -2   41.50   88.29
  -9  15   2  -49.70   22.60
   9  15  -2   43.20   88.79
  -9  15   2   17.30   20.10
  -8 -15   2    2.30   30.30
  -8 -15   2    2.30   29.50
  -8 -15   2    3.70   26.40
   8  15  -2   54.49   62.09
  -8  15   2    0.10   13.10
   8  15  -2   54.09   61.69
  -8  15   2   -0.30   12.70
  -8  15   2   -5.40   22.10
  -8  15   2   -5.30   22.30
  -8  15   2    1.00   14.60
  -8  15   2    2.70   18.50
  -7 -15   2    7.70   20.30
  -7 -15   2    6.70   25.40
  -7 -15   2    7.70   19.80
   7  15  -2   24.40   30.40
  -7  15   2   31.70   15.80
   7  15  -2    1.20   47.80
  -7  15   2   66.79   28.30
  -7  15   2   15.40   10.60
   7  15  -2   24.50   29.60
  -7  15   2   31.50   15.30
  -7  15   2   65.99   28.60
   7  15  -2    4.30   47.50
  -7  15   2   20.40   13.10
  -6 -15   2   15.50   25.20
  -6 -15   2   15.80   27.80
  -6 -15   2   15.80   28.50
   6  15  -2  -22.80   30.60
  -6  15   2   29.60   17.20
   6  15  -2  -22.60   29.70
   6  15  -2   26.90   50.99
   6  15  -2   34.30   50.59
  -6  15   2   -1.60   27.00
  -6  15   2   29.40   16.70
  -6  15   2   -1.60   27.30
  -5 -15   2   -5.30   45.10
  -5 -15   2    5.50   16.50
  -5 -15   2   37.20   27.00
  -5 -15   2    5.50   16.90
   5  15  -2   42.50   47.00
   5  15  -2   -1.40   21.30
  -5  15   2   -1.00   19.90
   5  15  -2   -1.30   20.80
  -5  15   2   -1.00   20.20
   5  15  -2   47.00   46.60
  -5  15   2   33.70   19.20
  -5  15   2   33.80   19.80
  -4 -15   2   61.49   28.90
  -4 -15   2   37.60   50.59
  -4  15   2   82.79   23.20
   4  15  -2   55.49   31.70
  -4  15   2   40.80   33.90
   4  15  -2   55.29   30.90
  -4  15   2   41.30   33.60
   4  15  -2    1.90   34.70
   4  15  -2    1.90   34.50
  -4  15   2   82.39   22.60
   4  15  -2   72.39   28.50
  -3 -15   2  164.68   37.80
  -3 -15   2  200.98   74.49
  -3  15   2  148.79   37.30
   3  15  -2   99.19   37.90
   3  15  -2  183.08   56.29
  -3  15   2  172.28   55.19
   3  15  -2  135.69   35.20
  -3  15   2  169.68   55.59
  -3  15   2  149.59   38.40
   3  15  -2   99.39   38.80
   3  15  -2  180.48   56.79
  -2 -15   2  166.48   75.89
   2 -15  -2  114.79   32.10
   2 -15  -2  114.59   31.30
   2  15  -2   41.50   48.20
  -2  15   2   84.59   52.29
  -2  15   2   33.40   24.10
  -2  15   2   33.70   24.90
  -2  15   2   86.19   51.99
   2  15  -2   42.00   47.80
   2  15  -2   96.69   32.80
   2  15  -2   96.49   33.60
  -1 -15   2  170.78   34.40
   1 -15  -2  133.09   37.80
  -1 -15   2  240.08   65.49
   1 -15  -2  132.89   36.90
  -1  15   2   87.49   34.70
   1  15  -2  158.88   33.40
  -1  15   2   87.09   33.80
   1  15  -2  166.68   43.70
   1  15  -2   75.69   47.40
   1  15  -2  166.58   42.70
  -1  15   2  109.59   47.50
   1  15  -2   74.99   48.00
  -1  15   2  114.09   47.40
   0 -15   2  285.27   77.79
   0 -15   2  243.68   39.80
   0 -15  -2  160.78   39.90
   0 -15  -2  160.98   40.80
   0 -15  -2  223.38   20.60
   0  15  -2  161.88   48.40
   0  15  -2  236.48   41.60
   0  15  -2  166.58   42.10
   0  15  -2  166.88   43.00
   0  15   2  159.38   63.39
   0  15   2  221.28   46.70
   0  15   2  219.88   45.40
   0  15  -2  163.68   47.90
  -1 -15  -2  236.18   34.00
  -1 -15  -2  195.18   47.10
  -1 -15  -2  194.98   46.10
   1 -15   2  188.18   67.89
  -1  15  -2  178.68   62.79
   1  15   2  165.68   69.69
   1  15   2  214.38   49.50
  -1  15  -2  176.88   63.59
  -1  15  -2  248.78   40.90
  -1  15  -2  237.78   50.09
  -1  15  -2  237.88   51.19
   1  15   2  215.68   50.89
  -2 -15  -2  196.28   36.70
  -2 -15  -2   92.19   29.10
   2 -15   2   55.69   50.69
  -2 -15  -2   92.19   29.70
   2  15   2  222.08   50.49
   2  15   2  157.98   74.59
  -2  15  -2  146.99   35.00
  -2  15  -2  167.28   37.30
  -2  15  -2  167.18   36.50
  -2  15  -2   94.89   59.69
  -2  15  -2   93.89   60.49
   2  15   2  223.48   51.99
  -3 -15  -2   34.20   25.40
  -3 -15  -2   21.70   24.00
  -3 -15  -2   34.20   26.00
   3  15   2   69.59   38.50
  -3  15  -2  101.89   30.90
   3  15   2   68.99   37.40
  -3  15  -2   32.60   37.90
  -3  15  -2  101.99   31.60
  -3  15  -2   32.30   38.40
   3  15   2  119.09   61.39
  -3  15  -2   25.80   20.50
  -4 -15  -2  -17.20   14.60
  -4 -15  -2  -16.80   14.90
  -4 -15  -2  -13.80   18.70
  -4  15  -2   48.30   23.10
   4  15   2  -35.70   32.50
  -4  15  -2   48.30   22.60
   4  15   2   -0.70   29.30
  -4  15  -2   37.60   39.70
  -4  15  -2   37.10   40.10
   4  15   2   -0.70   28.50
  -4  15  -2   30.50   25.60
  -5 -15  -2   20.60   29.40
  -5 -15  -2    8.00   21.30
  -5 -15  -2   20.60   28.70
  -5  15  -2    4.60   24.70
  -5  15  -2   53.79   26.30
  -5  15  -2  -32.60   30.20
   5  15   2  -64.49   55.59
  -5  15  -2   53.89   25.70
  -5  15  -2  -33.00   29.90
   5  15   2    7.20   35.40
   5  15   2    7.20   36.60
  -6 -15  -2    4.10   26.30
  -6 -15  -2   85.99   33.10
  -6 -15  -2   85.99   32.30
  -6  15  -2   60.89   32.90
  -6  15  -2   60.89   33.70
  -6  15  -2   49.99   36.40
   6  15   2   45.60   34.20
  -6  15  -2   66.29   37.20
   6  15   2   45.20   33.20
   6  15   2  116.09   69.39
  -6  15  -2   67.09   36.80
  -7 -15  -2   29.90   37.30
  -7 -15  -2   50.89   34.50
  -7 -15  -2   50.99   33.70
  -7  15  -2   15.40   26.90
  -7  15  -2    4.40   38.70
  -7  15  -2    4.40   38.30
  -7  15  -2  -58.39   29.70
   7  15   2   48.10   60.09
  -7  15  -2   15.00   26.20
  -8 -16   2   75.89   37.60
  -8 -16   2  118.19   42.40
  -8 -16   2  118.29   43.50
  -8  16   2   41.40   27.10
   8  16  -2   82.39   79.59
  -8  16   2   10.10   13.60
   8  16  -2   81.69   79.09
  -8  16   2   46.00   17.80
  -8  16   2   59.69   21.20
  -8  16   2   41.90   26.80
  -8  16   2   60.29   21.90
  -7 -16   2   38.50   31.30
  -7 -16   2   37.80   30.60
  -7 -16   2   12.00   31.70
  -7  16   2   81.29   25.70
  -7  16   2   96.79   38.60
  -7  16   2   80.69   25.00
  -7  16   2   58.69   10.20
  -7  16   2   95.39   39.00
  -7  16   2   43.70    7.80
   7  16  -2  250.57   88.09
   7  16  -2   72.59   51.59
   7  16  -2  249.28   88.59
   7  16  -2   72.29   50.19
  -6 -16   2   88.79   34.10
  -6 -16   2   88.69   33.30
  -6 -16   2  100.29   39.40
  -6  16   2   67.69   24.10
  -6  16   2   68.19   24.80
   6  16  -2   58.89   47.80
  -6  16   2   33.90   35.10
   6  16  -2   57.39   48.10
   6  16  -2  105.99   35.80
   6  16  -2  106.29   36.80
  -6  16   2   33.30   35.50
  -5 -16   2   -9.60   70.59
  -5 -16   2   63.79   34.60
   5  16  -2   96.09   66.69
   5  16  -2   52.89   39.00
   5  16  -2   53.29   40.00
  -5  16   2   10.20   39.60
  -5  16   2   61.99   25.80
  -5  16   2   10.40   39.10
   5  16  -2   94.69   67.19
  -5  16   2   62.39   26.60
  -4 -16   2   51.99   61.89
  -4 -16   2   55.89   22.90
   4  16  -2   44.10   53.99
   4  16  -2  102.09   30.20
   4  16  -2   13.30   25.20
   4  16  -2  101.79   29.50
  -4  16   2   36.00   22.70
  -4  16   2   23.60   39.40
  -4  16   2   35.90   22.00
  -4  16   2   24.10   39.00
   4  16  -2   44.80   53.49
  -3 -16   2   37.30   71.79
  -3 -16   2   14.50   27.10
   3  16  -2  107.29   38.60
   3  16  -2   25.40   61.69
  -3  16   2   59.69   25.40
  -3  16   2   24.10   45.60
   3  16  -2   58.09   25.70
  -3  16   2   60.09   26.20
   3  16  -2  107.49   39.60
   3  16  -2   25.00   62.29
  -3  16   2   23.60   46.00
   2 -16  -2    2.40   20.60
   2 -16  -2    2.40   20.10
  -2 -16   2   10.70   20.60
  -2 -16   2   15.00   38.70
  -2  16   2   84.49   50.49
   2  16  -2   13.70   20.00
   2  16  -2   68.09   42.70
  -2  16   2    3.50   19.90
   2  16  -2   15.50   21.90
   2  16  -2   67.19   43.10
  -2  16   2   76.39   50.89
   2  16  -2   15.50   22.50
  -2  16   2    3.50   19.40
  -1 -16   2   97.59   27.70
   1 -16  -2   92.79   29.80
  -1 -16   2   73.49   51.59
   1 -16  -2   92.69   29.10
   1  16  -2   -2.20   40.60
   1  16  -2   -2.20   41.00
  -1  16   2  147.49   55.29
   1  16  -2   70.09   26.80
  -1  16   2  150.08   54.99
   1  16  -2   73.79   25.20
   1  16  -2   70.19   27.50
  -1  16   2   93.49   39.30
  -1  16   2   93.99   40.40
   0 -16   2   68.79   53.59
   0 -16  -2   21.20    6.70
   0 -16  -2   11.20   24.20
   0 -16  -2   11.20   23.60
   0 -16   2   12.10   18.10
   0  16   2   31.30   36.10
   0  16  -2   26.90   19.80
   0  16  -2   31.30   18.00
   0  16   2   14.30   17.70
   0  16  -2  -36.20   45.60
   0  16  -2  -36.90   45.00
   0  16   2   30.40   36.10
   0  16   2   14.80   18.20
   0  16  -2   27.00   20.30
  -1 -16  -2   -9.10   19.40
  -1 -16  -2   -0.70   12.80
   1 -16   2   -1.50   38.60
  -1 -16  -2   -9.10   19.80
  -1  16  -2    8.10   18.20
   1  16   2   10.80   18.90
  -1  16  -2   29.60   56.09
  -1  16  -2  -16.10   17.90
   1  16   2   10.90   19.40
   1  16   2   39.40   30.60
  -1  16  -2   29.90   55.39
  -1  16  -2    8.10   17.80
  -2 -16  -2   45.60   29.70
  -2 -16  -2   -6.60   17.60
  -2 -16  -2   45.50   29.00
  -2  16  -2  -36.00   43.80
  -2  16  -2    2.50   18.80
  -2  16  -2  -36.40   43.20
  -2  16  -2   41.60   24.10
   2  16   2    5.70   26.00
   2  16   2    5.80   26.80
  -2  16  -2   41.60   23.60
   2  16   2   -9.20   39.20
  -3 -16  -2   19.20   29.30
  -3 -16  -2    7.50   20.50
  -3 -16  -2   19.10   28.60
  -3  16  -2   33.50   41.10
  -3  16  -2   17.50   21.80
  -3  16  -2   33.10   41.60
  -3  16  -2   -7.30   24.00
   3  16   2   13.60   32.60
  -3  16  -2   -7.50   23.40
   3  16   2   -4.20   49.80
   3  16   2   13.50   31.60
  -4 -16  -2   29.70   25.70
  -4 -16  -2   29.80   26.30
  -4 -16  -2   11.50   25.90
   4  16   2   45.80   37.80
  -4  16  -2   65.59   30.30
  -4  16  -2   51.09   43.80
   4  16   2   46.10   39.00
  -4  16  -2   34.30   25.20
   4  16   2  -28.40   43.00
  -4  16  -2   50.49   44.30
  -4  16  -2   34.30   24.70
  -5 -16  -2   37.70   37.50
  -5 -16  -2    2.80   30.30
  -5 -16  -2   37.70   36.60
  -5  16  -2   61.39   34.60
   5  16   2   22.90   39.00
   5  16   2  -58.09   66.79
   5  16   2   22.80   40.30
  -5  16  -2   32.70   48.40
  -5  16  -2   32.20   48.80
  -5  16  -2   26.40   26.60
  -5  16  -2   61.39   33.80
  -6 -16  -2   12.00   28.20
  -6 -16  -2   28.10   38.70
  -6 -16  -2   28.10   37.80
   6  16   2   57.69   88.49
   6  16   2   44.00   37.80
  -6  16  -2  -58.99   37.60
   6  16   2   43.60   36.70
  -6  16  -2   16.10   31.40
  -6  16  -2   16.10   32.10
  -6  16  -2    8.80   29.70
  -6  16  -2  -58.29   38.00
  -7 -17   2   23.90   33.10
   7  17  -2   55.49   66.79
  -7  17   2   13.40   20.90
  -7  17   2   13.10   20.30
  -7  17   2   25.40   31.70
  -7  17   2   25.60   31.40
   7  17  -2   58.69   67.29
  -6 -17   2   17.80   31.20
  -6  17   2  -67.89   31.10
   6  17  -2  -53.69   40.40
  -6  17   2   25.00   20.70
  -6  17   2  -68.89   30.70
   6  17  -2  -54.19   63.29
  -6  17   2   25.10   21.40
   6  17  -2  -53.39   39.30
   6  17  -2  -54.99   62.89
  -5 -17   2   11.60   25.20
  -5 -17   2  120.19   74.29
  -5  17   2   60.69   37.40
  -5  17   2   60.09   37.80
  -5  17   2   26.70   25.30
  -5  17   2   26.30   24.60
   5  17  -2   84.29   35.30
   5  17  -2   20.50   70.99
   5  17  -2   20.30   71.59
   5  17  -2   84.69   36.30
  -4 -17   2  -40.40   79.09
  -4 -17   2   48.50   36.40
  -4  17   2   24.10   25.20
  -4  17   2   60.49   42.00
  -4  17   2   24.50   25.90
  -4  17   2   59.49   42.50
   4  17  -2   42.30   50.29
   4  17  -2   41.70   50.79
   4  17  -2   48.70   45.10
   4  17  -2   48.80   46.30
  -3 -17   2   49.00   25.70
  -3 -17   2   22.70   80.39
  -3  17   2  119.79   52.09
  -3  17   2   51.19   28.80
  -3  17   2   51.19   28.00
   3  17  -2   18.20   19.70
   3  17  -2   47.30   49.60
  -3  17   2  121.59   51.59
   3  17  -2  115.89   40.10
   3  17  -2  115.59   39.10
   3  17  -2   48.00   49.10
  -2 -17   2  196.08   76.29
  -2 -17   2  134.89   36.90
   2  17  -2  108.59   64.19
   2  17  -2  107.19   64.89
  -2  17   2   92.59   51.19
  -2  17   2  108.09   38.80
   2  17  -2  137.39   38.60
  -2  17   2  109.09   39.90
   2  17  -2  137.79   31.30
   2  17  -2  137.19   37.70
  -2  17   2   86.39   51.59
  -1 -17   2  136.29   34.30
  -1 -17   2  102.09   68.99
   1 -17  -2  111.89   40.20
   1 -17  -2  112.09   41.10
  -1  17   2  114.79   58.69
  -1  17   2  104.09   37.20
  -1  17   2  103.69   36.20
   1  17  -2  101.99   37.00
  -1  17   2  119.49   58.29
   1  17  -2  153.58   59.29
   1  17  -2  140.99   32.90
   1  17  -2  151.88   59.99
   1  17  -2  101.79   36.20
   0 -17  -2  136.69   41.30
   0 -17  -2  136.59   40.30
   0 -17   2   69.59   27.20
   0  17   2  191.88   49.30
   0  17  -2  129.59   63.09
   0  17   2  190.88   47.90
   0  17  -2  111.39   35.60
   0  17  -2  132.29   31.90
   0  17  -2  111.19   34.70
   0  17   2  235.18   74.59
   0  17   2  233.58   74.79
   0  17  -2  128.19   63.89
  -1 -17  -2  151.18   46.50
  -1 -17  -2  150.88   45.40
  -1 -17  -2  114.39   22.90
   1  17   2   59.29   30.70
   1  17   2   58.89   29.90
   1  17   2   63.09   58.39
  -1  17  -2  105.19   42.80
  -1  17  -2  194.08   64.59
  -1  17  -2  196.08   63.79
  -1  17  -2   91.09   27.00
  -1  17  -2  105.29   43.80
   1  17   2   54.19   58.49
  -2 -17  -2   45.40   32.50
  -2 -17  -2   45.40   33.30
  -2 -17  -2   56.19   25.30
   2  17   2   40.60   29.90
  -2  17  -2   45.10   58.49
  -2  17  -2   81.59   28.40
  -2  17  -2   44.70   59.19
  -2  17  -2   55.89   32.30
   2  17   2   41.20   30.80
   2  17   2  -29.80   59.79
  -2  17  -2   55.89   31.60
  -3 -17  -2   25.90   32.00
  -3 -17  -2    0.40   23.80
  -3 -17  -2   26.00   31.30
   3  17   2   65.59   34.80
  -3  17  -2  178.58   60.29
  -3  17  -2   74.69   28.30
  -3  17  -2  180.68   59.59
   3  17   2  119.29   86.99
   3  17   2   65.99   35.90
  -3  17  -2   56.09   27.30
  -3  17  -2   56.09   28.00
  -4 -17  -2   78.69   30.80
  -4 -17  -2   22.80   26.60
  -4 -17  -2   22.80   27.30
  -4  17  -2  117.19   59.79
  -4  17  -2   32.20   31.60
  -4  17  -2  115.89   60.49
   4  17   2  135.99   45.20
   4  17   2  134.99   43.80
  -4  17  -2  141.99   36.60
  -4  17  -2   32.20   32.30
  -5 -17  -2   26.00   31.00
  -5 -17  -2    0.90   24.40
  -5 -17  -2    0.80   25.00
  -5  17  -2  -34.30   49.90
   5  17   2  -47.50   27.00
  -5  17  -2   32.60   28.30
  -5  17  -2   12.40   27.70
   5  17   2   -9.00   62.19
  -5  17  -2  -34.70   49.40
  -5  17  -2   32.60   29.00
   5  17   2  -47.90   27.80
  -6 -18   2  -42.40   34.50
  -6  18   2  -32.50   37.90
   6  18  -2  121.69   86.49
  -6  18   2  -32.30   38.30
   6  18  -2    2.50   31.90
  -6  18   2   77.19   29.20
   6  18  -2    3.20   32.70
  -6  18   2   76.79   28.30
   6  18  -2  123.39   85.79
  -5 -18   2  -11.20   31.60
  -5  18   2   22.40   26.60
  -5  18   2   25.00   44.80
   5  18  -2   19.20   47.10
  -5  18   2   22.10   25.80
  -5  18   2   24.90   45.40
   5  18  -2   19.30   48.30
   5  18  -2  -10.30   65.49
   5  18  -2  -10.20   66.09
  -4 -18   2   68.89   71.59
  -4 -18   2   66.79   33.80
   4  18  -2   -7.00   50.39
   4  18  -2   -3.30   30.60
  -4  18   2  -94.59   35.20
  -4  18   2  -95.69   34.80
  -4  18   2   27.20   23.20
  -4  18   2   27.50   23.90
   4  18  -2   -3.30   31.40
   4  18  -2   -6.90   50.89
  -3 -18   2    2.70   29.20
  -3  18   2   16.30   24.70
   3  18  -2  -37.80   46.70
  -3  18   2   16.40   25.40
  -3  18   2  166.98   54.09
   3  18  -2   21.10   28.00
   3  18  -2   21.10   27.30
  -3  18   2  164.78   54.69
   3  18  -2  -38.30   46.20
   3  18  -2   -6.10   22.20
  -2 -18   2   18.50   27.30
  -2  18   2  -52.29   44.10
   2  18  -2  -37.50   41.20
   2  18  -2  -56.69   22.00
  -2  18   2   25.60   27.80
   2  18  -2  -37.10   41.60
   2  18  -2    7.30   19.90
  -2  18   2   25.50   27.00
  -2  18   2  -53.09   43.70
   2  18  -2  -56.69   22.50
   1 -18  -2   -3.70   30.30
   1 -18  -2   -3.70   31.00
  -1 -18   2    0.70   22.80
  -1  18   2  -88.09   44.90
   1  18  -2  -11.60   19.40
  -1  18   2  -40.50   25.80
   1  18  -2  -19.60   21.40
   1  18  -2   62.19   64.49
   1  18  -2   62.79   63.79
  -1  18   2  -40.30   25.10
   1  18  -2  -19.70   20.90
  -1  18   2  -83.69   45.00
   0 -18  -2  -16.30   29.60
   0 -18   2  -18.10   17.30
   0 -18  -2  -16.40   30.30
   0  18   2   14.80   62.49
   0  18   2  -27.70   18.80
   0  18   2  -27.50   18.30
   0  18  -2  -18.10   51.69
   0  18  -2   18.10   25.20
   0  18   2   19.80   62.19
   0  18  -2  -17.80   52.29
   0  18  -2   18.10   25.80
   0  18  -2   -6.60   20.00
  -1 -18  -2   -6.90   24.60
  -1 -18  -2   -6.80   24.00
  -1 -18  -2   -9.80   10.00
  -1  18  -2    5.70   20.90
  -1  18  -2  -58.79   49.80
   1  18   2    4.60   34.90
  -1  18  -2   11.80   33.20
   1  18   2  -96.09   50.09
  -1  18  -2   11.90   34.00
   1  18   2    4.50   33.90
   1  18   2  -95.79   49.90
  -1  18  -2  -58.19   50.39
  -2 -18  -2   39.60   24.10
  -2 -18  -2   32.20   32.00
  -2 -18  -2   32.10   31.20
  -2  18  -2   12.40   56.29
   2  18   2   46.30   43.60
  -2  18  -2   -1.10   21.80
   2  18   2 -125.19   64.99
   2  18   2   46.70   44.90
  -2  18  -2   24.50   35.80
  -2  18  -2   24.40   34.90
   2  18   2 -104.89   64.79
  -2  18  -2   12.30   56.99
  -3 -18  -2  -40.50   29.40
  -3 -18  -2  -40.50   28.70
  -3 -18  -2    1.80   25.40
   3  18   2   12.40   34.90
  -3  18  -2   12.50   25.60
  -3  18  -2   39.30   28.50
  -3  18  -2   -7.20   55.09
  -3  18  -2   -7.40   54.39
  -3  18  -2   39.40   29.10
   3  18   2  196.28   85.09
   3  18   2   12.60   35.90
  -4 -18  -2    3.40   34.10
  -4  18  -2   91.59   43.70
   4  18   2   77.79   36.20
  -4  18  -2   64.49   30.20
  -4  18  -2   91.69   44.80
   4  18   2  137.79   74.09
   4  18   2   77.29   35.10
  -4 -19   2   45.30   39.90
  -4  19   2   83.29   39.60
   4  19  -2  107.99   80.69
  -4  19   2  -11.00   42.30
  -4  19   2   82.89   38.50
   4  19  -2   11.20   36.70
   4  19  -2   11.20   35.80
  -4  19   2  -10.90   42.80
   4  19  -2  109.29   79.89
  -3 -19   2   88.79   38.10
  -3  19   2   92.69   40.60
   3  19  -2   69.39   41.90
   3  19  -2   69.09   40.80
  -3  19   2   74.59   57.79
   3  19  -2   59.49   73.29
  -3  19   2   75.09   57.19
  -3  19   2   93.19   41.80
   3  19  -2   58.89   74.09
  -2 -19   2   68.59   32.00
  -2  19   2   23.20   30.30
  -2  19   2   23.40   31.10
   2  19  -2   44.60   31.40
   2  19  -2   60.79   29.90
  -2  19   2  108.99   58.49
  -2  19   2  110.49   57.99
   2  19  -2   40.10   70.59
   2  19  -2   44.80   32.30
   2  19  -2   40.70   69.79
  -1 -19   2   41.80   25.70
  -1  19   2  -19.30   54.49
   1  19  -2   -7.20   26.50
  -1  19   2  131.29   30.60
   1  19  -2  164.08   63.29
   1  19  -2   85.19   28.90
  -1  19   2  -23.20   54.99
   1  19  -2   -6.60   25.80
  -1  19   2  132.09   31.50
   1  19  -2  165.78   62.59
   0 -19  -2  162.38   50.89
   0 -19  -2  162.18   49.60
   0  19   2  179.98   53.19
   0  19   2  133.69   78.99
   0  19  -2   22.90   32.30
   0  19   2  181.48   54.79
   0  19   2  128.99   79.39
   0  19  -2   13.50   76.19
   0  19  -2   13.30   77.19
   0  19  -2   22.90   31.50
   0  19  -2   82.99   29.20
  -1 -19  -2   30.40   41.20
  -1 -19  -2   62.59   12.40
  -1 -19  -2   30.40   42.30
  -1  19  -2   85.69   22.90
   1  19   2   84.69   39.70
  -1  19  -2  -18.00   61.89
  -1  19  -2   63.79   42.00
   1  19   2   27.60   72.59
  -1  19  -2   63.79   43.10
   1  19   2   85.09   40.90
   1  19   2   32.10   72.29
  -1  19  -2  -18.20   61.09
  -2 -19  -2   30.40   42.10
  -2 -19  -2   30.40   43.10
  -2 -19  -2   26.70   23.90
   2  19   2  -37.30   72.69
   2  19   2   21.00   45.80
   2  19   2  -42.00   72.29
  -2  19  -2  -25.00   46.80
   2  19   2   20.40   44.40
  -2  19  -2   26.20   38.70
  -2  19  -2   73.59   26.30
  -2  19  -2  -25.30   46.20
  -2  19  -2   26.20   39.70
  13   0  -3    5.20   34.30
 -13   0   3  -10.30   31.70
  13   0  -3    5.30   34.70
  12   0  -3  -30.00   23.50
  12   0  -3  -29.70   23.70
  12   0  -3  -13.60   20.10
 -12   0   3    0.40   16.30
  12   0  -3  -13.60   19.70
  11   0  -3   27.60   29.50
  11   0  -3   87.99   23.40
  11   0  -3   27.20   29.80
 -11   0   3  132.99   38.60
  11   0  -3   87.89   23.90
 -10   0   3   54.09   24.90
  10   0  -3   65.59   29.40
  10   0  -3   67.99   19.40
  10   0  -3   64.59   29.60
  10   0  -3   67.79   18.90
  -9   0   3  345.27   55.69
   9   0  -3  267.27   31.70
   9   0  -3  300.37   49.00
   9   0  -3  296.17   49.40
   9   0  -3  265.37   30.90
   8   0  -3   46.80   21.70
   8   0  -3   54.59   13.80
   8   0  -3   46.20   21.90
   8   0  -3   54.19   13.40
  -8   0   3   96.79   27.80
   7   0  -3   89.89   26.40
   7   0  -3   74.39   14.90
   7   0  -3   74.79   15.30
  -7   0   3   53.19   20.80
   7   0  -3   90.99   26.20
   6   0  -3  387.06   45.60
  -6   0   3  430.86   46.30
   6   0  -3  391.46   45.20
  -6   0   3  415.96   45.60
   6   0  -3  427.36   35.20
   6   0  -3  426.66   34.60
   5   0  -3   13.70   13.70
  -5   0   3  -10.10    6.70
   5   0  -3  -10.40    7.20
  -5   0   3   -9.00    8.50
   5   0  -3    1.20    4.60
   5   0  -3    1.20    4.70
   5   0  -3   13.80   13.50
  -4   0   3  468.85   44.60
  -4   0   3  475.85   44.30
   4   0  -3  327.87   35.80
   4   0  -3  350.86   40.60
  -4   0   3  334.47   36.40
   4   0  -3  346.87   40.90
   3   0  -3   89.69   17.70
  -3   0   3   73.49   21.10
  -3   0   3   74.19   20.80
   3   0  -3   35.20   15.20
  -3   0   3   67.69   15.90
   3   0  -3   35.60   15.10
  -2   0   3  294.87   29.50
  -2   0   3  269.97   41.20
  -2   0   3  266.67   41.60
   2   0  -3  302.57   29.70
  -1   0   3 1428.86   95.29
   1   0  -3 1441.36   96.19
   1   0  -3 1480.55  110.09
  -1   0   3 1607.94  114.79
  -1   0   3 1628.84  114.19
   1   0  -3 1464.15  110.69
   0   0   3 2263.87  164.78
   0   0  -3 2897.71  175.58
   0   0  -3 2281.17  148.19
   0   0   3 2432.96  149.29
   0   0  -3 2920.21  174.48
   0   0   3 2237.38  165.38
  -1   0  -3    1.40   11.90
  -1   0  -3    1.50   11.70
   1   0   3    7.30   10.30
  -1   0  -3    7.50    7.40
   1   0   3    7.20   10.50
   2   0   3   84.99   25.20
   2   0   3   85.69   24.90
  -2   0  -3  145.39   33.90
  -2   0  -3  145.09   34.60
   3   0   3   55.89   21.20
  -3   0  -3  130.89   31.10
   3   0   3   55.39   21.50
  -3   0  -3  130.69   30.30
   4   0   3  -13.10   10.30
  -4   0  -3    4.40   13.50
   4   0   3  -13.10   10.20
  -4   0  -3    4.30   13.10
  -5   0  -3  100.69   31.30
  -5   0  -3   99.99   30.40
   5   0   3   99.69   28.50
   5   0   3   98.99   29.00
  -6   0  -3  253.07   47.10
   6   0   3  145.79   38.70
  -6   0  -3  255.17   48.50
   6   0   3  144.69   39.30
   7   0   3    7.60   18.50
  -7   0  -3   51.39   19.10
   7   0   3    7.50   18.70
  -7   0  -3   51.89   19.70
  -8   0  -3  326.77   56.49
  -8   0  -3  329.07   57.99
  -9   0  -3   15.80   20.90
  -9   0  -3   15.90   21.50
 -10   0  -3   68.59   30.10
 -10   0  -3   68.89   30.90
 -11   0  -3   13.60   25.80
 -11   0  -3   13.60   26.50
  13  -1  -3   49.50   28.40
 -13  -1   3   37.40   27.90
  13  -1  -3   49.10   28.80
 -13   1   3   47.00   35.60
  13   1  -3   -1.40   42.90
  13   1  -3   -1.40   42.40
  12  -1  -3   18.90   23.10
 -12  -1   3   80.79   39.20
  12  -1  -3   18.90   22.80
  12   1  -3  -12.70   37.30
 -12   1   3   21.60   27.50
  12   1  -3  -12.50   37.70
 -11  -1   3   16.10   24.40
  11  -1  -3   -9.00   18.90
  11  -1  -3   23.80   15.40
  11  -1  -3   23.70   15.70
  11  -1  -3   -8.90   19.10
  11   1  -3   57.09   21.30
  11   1  -3   37.50   25.00
  11   1  -3   57.29   21.80
 -11   1   3   56.39   27.40
  11   1  -3   37.90   24.90
  10  -1  -3  300.17   42.80
  10  -1  -3  260.77   34.00
 -10  -1   3  250.37   51.09
  10  -1  -3  270.37   32.70
  10  -1  -3  303.87   42.40
  10   1  -3  184.38   47.90
  10   1  -3  178.18   48.20
  10   1  -3  292.77   40.50
  10   1  -3  290.67   39.50
 -10   1   3  262.57   51.39
   9  -1  -3  139.39   21.50
  -9  -1   3  152.18   38.60
   9  -1  -3  139.79   22.00
   9   1  -3  144.59   39.10
   9   1  -3  133.49   26.00
   9   1  -3  134.69   26.70
   9   1  -3  141.29   39.40
  -9   1   3  173.88   37.80
   8  -1  -3  218.68   23.40
  -8  -1   3  266.07   48.20
   8  -1  -3  217.28   22.90
   8  -1  -3  214.68   34.70
   8  -1  -3  212.18   35.00
   8   1  -3  249.58   46.60
   8   1  -3  235.88   31.10
  -8   1   3  222.88   43.20
   8   1  -3  237.38   31.90
   8   1  -3  252.07   46.20
   7  -1  -3  438.66   43.60
   7  -1  -3  433.96   43.90
  -7  -1   3  455.15   61.19
   7  -1  -3  395.86   31.70
   7  -1  -3  398.86   32.20
   7   1  -3  418.36   59.89
   7   1  -3  441.66   39.90
   7   1  -3  424.16   59.49
   7   1  -3  439.96   39.20
   6  -1  -3   19.10    6.50
  -6  -1   3   16.20    9.30
   6  -1  -3   25.00   11.90
  -6  -1   3    6.60   13.70
   6  -1  -3   24.80   12.00
   6  -1  -3   19.00    6.30
   6   1  -3   21.60   15.80
   6   1  -3   21.40   14.50
   6   1  -3   35.60   10.80
   6   1  -3   35.60   10.50
   6   1  -3   21.70   14.40
  -6   1   3   34.60   17.10
   5  -1  -3  112.49   13.40
   5  -1  -3   94.79   21.50
   5  -1  -3  112.39   13.60
   5  -1  -3  161.48   27.50
   5  -1  -3  163.48   27.20
  -5  -1   3   96.79   21.10
  -5  -1   3  113.49   27.60
  -5   1   3  139.19   26.20
   5   1  -3  105.89   19.00
   5   1  -3  111.69   25.80
  -5   1   3  152.98   25.30
   5   1  -3  105.79   18.60
   5   1  -3  157.58   32.50
   5   1  -3  159.28   32.10
  -4  -1   3  763.52   60.89
  -4  -1   3  783.52   68.09
   4  -1  -3  781.22   58.29
   4  -1  -3  637.44   56.69
  -4  -1   3  801.52   67.89
   4  -1  -3  646.04   56.39
   4   1  -3  793.72   61.49
  -4   1   3  742.13   59.09
   4   1  -3  699.13   64.89
   4   1  -3  687.13   51.39
  -4   1   3  707.43   57.19
   4   1  -3  687.93   51.99
   4   1  -3  691.83   65.39
  -4   1   3  751.32   58.69
   3  -1  -3   38.00   11.70
  -3  -1   3   59.89   20.70
   3  -1  -3   21.90   10.40
  -3  -1   3   60.49   20.40
  -3  -1   3   31.10   11.80
   3  -1  -3   21.70   10.50
  -3   1   3   44.60   15.30
  -3   1   3   20.80    9.40
  -3   1   3   45.20   15.10
   3   1  -3   32.20   11.20
   2  -1  -3  158.08   22.50
  -2  -1   3  144.79   31.10
  -2  -1   3  143.29   31.50
  -2  -1   3  125.39   21.60
  -2   1   3  133.09   26.50
  -2   1   3  131.39   26.80
  -2   1   3  100.59   18.00
   2   1  -3  149.99   25.00
   2   1  -3   88.39   24.80
   2   1  -3   87.29   25.10
   1  -1  -3 3468.65  202.98
  -1  -1   3 3603.94  225.58
  -1  -1   3 3650.43  224.88
  -1  -1   3 3592.54  206.38
   1   1  -3 3499.65  223.48
   1   1  -3 3307.87  205.48
  -1   1   3 3258.17  216.38
  -1   1   3 3630.54  202.58
   1   1  -3 3545.35  222.88
  -1   1   3 3292.27  215.68
   0  -1   3 1068.29   69.29
   0  -1   3  926.21   84.89
   0  -1   3  938.41   84.39
   0  -1  -3  921.01   64.49
   0   1  -3 1068.39   87.09
   0   1  -3  940.61   67.69
   0   1   3  823.52   73.19
   0   1  -3 1082.99   86.49
   0   1   3  830.02   72.59
   1  -1   3  537.65   62.99
   1  -1   3  544.45   62.59
   1   1   3  534.65   52.39
   1   1   3  531.15   52.99
  -1   1  -3  716.43   68.19
  -1   1  -3  710.53   68.99
  -1   1  -3  559.34   46.00
   2  -1   3  267.97   49.20
   2  -1   3  264.87   49.70
   2   1   3  292.17   43.60
   2   1   3  293.87   43.00
   3  -1   3  677.93   72.69
   3  -1   3  685.43   72.09
   3   1   3  795.12   69.29
   3   1   3  799.62   68.49
   4  -1   3  450.35   66.99
   4  -1   3  455.05   66.29
   4   1   3  564.54   58.29
   4   1   3  567.74   57.49
   5  -1   3  279.37   50.09
   5  -1   3  276.57   50.69
   5   1   3  200.18   41.00
   5   1   3  201.38   40.30
  -6  -1  -3  391.36   56.99
  -6  -1  -3  394.56   58.69
   6  -1   3  222.68   51.59
   6  -1   3  220.38   52.19
  -6   1  -3  402.96   57.09
   6   1   3  218.28   44.00
   6   1   3  219.58   43.40
  -6   1  -3  405.96   58.79
   7  -1   3   21.00   20.40
  -7  -1  -3   77.49   25.10
  -7  -1  -3   77.99   25.80
   7  -1   3   21.20   20.10
   7   1   3   25.40   20.70
   7   1   3   25.20   21.00
  -7   1  -3  117.19   32.10
  -7   1  -3  118.19   33.10
  -8  -1  -3   47.60   21.00
  -8  -1  -3   47.30   20.40
  -8   1  -3   39.00   23.90
  -8   1  -3   39.30   24.60
  -9  -1  -3   74.09   26.00
  -9  -1  -3   74.49   26.70
  -9   1  -3   42.80   25.80
  -9   1  -3   43.10   26.50
 -10  -1  -3    6.70   23.70
 -10  -1  -3    6.80   24.40
 -10   1  -3   41.30   29.40
 -10   1  -3   41.50   30.30
 -11  -1  -3  -12.30   25.40
 -11  -1  -3  -12.30   26.10
  11   1   3    2.50   37.00
 -11   1  -3    9.60   20.30
 -11   1  -3    9.60   20.90
 -13  -2   3   17.40   32.50
  13   2  -3   -7.80   47.50
  13   2  -3   -8.20   47.00
 -13   2   3   -3.60   23.30
  12  -2  -3    6.70    9.10
  12  -2  -3    3.50    9.60
  12  -2  -3    6.90    8.90
  12  -2  -3    3.40    9.70
 -12  -2   3  -17.60   16.30
  12   2  -3  -23.90   34.70
 -12   2   3    4.30   27.10
  12   2  -3  -23.60   35.00
  11  -2  -3   40.90   16.10
 -11  -2   3   40.90   17.30
 -11  -2   3   40.90   16.90
  11  -2  -3   41.40   15.90
 -11  -2   3    5.20   16.40
 -11   2   3   45.20   23.50
  11   2  -3   52.99   32.60
  11   2  -3   53.39   32.40
  10  -2  -3   34.90   12.00
  10  -2  -3   40.10   15.00
 -10  -2   3   47.70   16.50
 -10  -2   3   36.80   20.40
  10  -2  -3   39.60   15.10
 -10  -2   3   47.80   16.90
  10  -2  -3   35.30   11.90
  10   2  -3   63.69   19.90
 -10   2   3   14.60   19.10
  10   2  -3   63.09   19.30
  10   2  -3   79.09   38.00
  10   2  -3   69.19   38.30
  -9  -2   3   36.80   14.40
   9  -2  -3   24.20   10.20
   9  -2  -3   47.80   14.40
   9  -2  -3   47.40   14.60
  -9  -2   3   36.90   14.70
  -9  -2   3   47.80   20.00
   9  -2  -3   24.30   10.00
   9   2  -3   39.50   17.70
   9   2  -3   63.69   29.10
   9   2  -3   39.20   17.20
   9   2  -3   60.09   28.90
   8  -2  -3  272.47   30.60
   8  -2  -3  275.57   30.40
   8  -2  -3  302.27   26.10
  -8  -2   3  335.67   55.59
  -8  -2   3  382.56   39.00
   8  -2  -3  303.87   25.80
  -8  -2   3  382.06   38.30
   8   2  -3  361.26   61.29
   8   2  -3  352.46   61.69
  -8   2   3  351.66   52.59
   8   2  -3  375.76   37.50
   8   2  -3  377.86   38.30
   7  -2  -3   51.89    8.80
  -7  -2   3   64.69   23.30
   7  -2  -3   80.59   14.40
   7  -2  -3   79.69   14.60
   7  -2  -3   51.99    9.00
  -7  -2   3   34.50   23.90
   7   2  -3   24.80   24.10
  -7   2   3   66.49   21.90
   7   2  -3   24.40   24.30
   7   2  -3   49.70   15.60
   7   2  -3   49.60   15.20
  -6  -2   3  558.94   65.29
   6  -2  -3  543.05   40.30
   6  -2  -3  555.34   34.40
   6  -2  -3  559.54   34.60
  -6  -2   3  508.25   54.89
   6  -2  -3  535.95   40.50
   6   2  -3  485.75   69.89
   6   2  -3  594.04   49.40
   6   2  -3  643.54   60.19
   6   2  -3  593.44   48.70
  -6   2   3  578.34   54.29
   6   2  -3  492.85   69.39
  -5  -2   3  462.75   66.09
  -5  -2   3  508.05   51.09
   5  -2  -3  487.65   39.10
   5  -2  -3  516.35   33.60
   5  -2  -3  516.55   33.40
   5  -2  -3  468.45   45.10
   5  -2  -3  493.15   38.90
  -5   2   3  526.15   47.80
  -5   2   3  630.54   41.40
   5   2  -3  536.75   61.59
   5   2  -3  568.04   45.50
   5   2  -3  558.04   53.29
   5   2  -3  543.65   61.09
   5   2  -3  568.04   46.20
   4  -2  -3  506.75   40.70
   4  -2  -3  554.24   43.50
   4  -2  -3  502.85   41.10
  -4  -2   3  524.85   56.49
  -4  -2   3  367.66   44.20
  -4  -2   3  511.85   56.59
  -4   2   3  503.45   42.90
  -4   2   3  559.54   44.50
   4   2  -3  444.66   40.00
   4   2  -3  479.85   47.90
   4   2  -3  445.16   40.50
  -4   2   3  565.54   44.20
   3  -2  -3  535.15   45.30
   3  -2  -3  677.63   50.79
  -3  -2   3  609.84   63.69
   3  -2  -3  673.83   51.39
  -3  -2   3  601.84   64.09
  -3  -2   3  517.95   50.29
   3   2  -3  688.03   54.79
  -3   2   3  572.64   52.09
  -3   2   3  642.14   47.40
  -3   2   3  580.14   51.79
  -2  -2   3 1691.03  114.29
   2  -2  -3 1741.63  107.59
   2   2  -3 1765.62  129.69
  -2   2   3 1748.53  117.69
   2   2  -3 1808.32  115.39
   2   2  -3 1745.03  130.39
  -2   2   3 1686.53  106.69
  -2   2   3 1765.22  117.09
  -1  -2   3 1483.55   98.19
  -1  -2   3 1422.06  112.79
  -1  -2   3 1405.76  113.49
   1  -2  -3 1481.25   92.09
   1   2  -3 1493.85   98.39
   1   2  -3 1501.85  116.39
  -1   2   3 1377.46   99.59
   1   2  -3 1521.45  115.79
  -1   2   3 1551.84   91.69
  -1   2   3 1385.86   98.99
   0  -2  -3    1.00    9.50
   0  -2  -3    1.00    9.70
   0  -2  -3   12.90    7.00
   0  -2   3   15.90   14.20
   0  -2   3   14.40    8.50
   0  -2   3   15.70   14.30
   0   2  -3    5.50   10.20
   0   2   3    9.20    6.30
   0   2   3    9.20    6.20
   0   2  -3    5.50   10.30
   0   2  -3   38.60   13.60
   1  -2   3  590.94   67.69
   1  -2   3  598.84   67.19
  -1   2  -3  570.64   64.39
  -1   2  -3  623.74   49.20
   1   2   3  560.04   52.09
  -1   2  -3  577.24   63.89
   1   2   3  561.94   51.39
   2  -2   3  179.58   43.20
  -2  -2  -3  182.28   35.00
   2  -2   3  181.88   42.80
  -2  -2  -3  181.08   34.00
  -2   2  -3  225.08   46.10
   2   2   3  144.69   28.90
  -2   2  -3  226.88   45.40
  -2   2  -3  131.09   25.00
   2   2   3  144.99   28.40
  -3  -2  -3   53.29   20.70
  -3  -2  -3   53.69   21.30
   3  -2   3   21.40   20.40
   3  -2   3   21.70   20.20
  -3   2  -3   54.19   20.70
  -3   2  -3   53.89   21.10
   3   2   3   27.10   13.70
   3   2   3   27.20   13.40
  -4  -2  -3  150.98   32.00
  -4  -2  -3  152.28   33.00
   4  -2   3   70.09   28.60
   4  -2   3   69.29   28.90
   4   2   3  106.79   26.70
  -4   2  -3  262.87   54.59
   4   2   3  106.39   27.20
  -4   2  -3  262.37   55.69
  -5  -2  -3   18.30   13.10
   5  -2   3   30.80   20.80
  -5  -2  -3   18.20   12.70
   5  -2   3   31.20   20.60
   5   2   3   29.20   16.20
  -5   2  -3   84.69   33.30
   5   2   3   29.30   15.90
  -5   2  -3   84.59   32.50
  -6  -2  -3  125.29   32.10
  -6  -2  -3  126.19   33.10
   6  -2   3  129.09   35.90
   6  -2   3  127.59   36.30
  -6   2  -3  227.38   49.20
  -6   2  -3  228.58   50.59
   6   2   3   70.59   24.30
   6   2   3   70.99   23.80
  -7  -2  -3   40.20   22.30
  -7  -2  -3   40.00   21.70
   7  -2   3   34.70   24.10
   7  -2   3   35.10   23.80
  -7   2  -3   29.90   21.50
  -7   2  -3   30.10   22.20
   7   2   3    4.50   13.00
   7   2   3    4.50   13.20
  -8  -2  -3   -3.90   18.30
  -8  -2  -3   -3.90   18.80
   8   2   3    5.10   15.60
  -8   2  -3   44.80   21.70
  -8   2  -3   44.50   21.00
   8   2   3    5.00   15.90
  -9  -2  -3   67.19   28.80
  -9  -2  -3   66.89   28.10
  -9   2  -3  137.09   40.50
  -9   2  -3  136.19   39.30
 -10  -2  -3   42.10   25.70
 -10  -2  -3   42.30   26.40
 -10   2  -3   79.89   28.80
 -10   2  -3   80.39   29.60
 -11  -2  -3   13.40   26.70
 -11  -2  -3   13.40   26.00
 -11   2  -3    2.20   22.20
  11   2   3  -25.00   43.30
 -11   2  -3    2.20   21.60
 -13  -3   3   53.49   31.70
 -13   3   3   17.60   34.10
  13   3  -3   11.30   56.69
  13   3  -3   11.80   56.29
 -12  -3   3   67.39   21.80
 -12  -3   3   50.29   37.60
 -12  -3   3   67.49   22.40
  12   3  -3   81.29   46.60
  12   3  -3   87.19   46.20
 -12   3   3  111.89   36.10
 -11  -3   3   36.40   16.30
 -11  -3   3   36.30   16.00
 -11  -3   3   57.89   36.20
  11   3  -3    9.40   33.50
 -11   3   3   91.29   33.50
  11   3  -3   10.40   33.30
 -10  -3   3  149.39   30.60
 -10  -3   3  149.59   31.30
 -10  -3   3   67.79   30.30
  10   3  -3   70.29   35.10
  10   3  -3   98.39   26.70
  10   3  -3   62.89   35.40
 -10   3   3   77.69   30.70
  10   3  -3   97.49   25.90
  -9  -3   3  148.79   29.80
  -9  -3   3  144.39   42.50
  -9  -3   3  148.59   29.20
   9   3  -3  125.29   44.00
   9   3  -3  121.79   44.20
  -9   3   3  133.69   35.20
   9   3  -3  139.19   30.80
   9   3  -3  138.39   30.00
  -8  -3   3  107.79   33.70
  -8  -3   3   82.19   21.00
  -8  -3   3   82.29   21.50
   8   3  -3   96.79   33.70
   8   3  -3  120.39   24.90
   8   3  -3  100.09   33.50
   8   3  -3  120.89   25.50
  -8   3   3  140.29   32.10
  -7  -3   3   28.90   16.40
  -7  -3   3    5.10   10.30
  -7  -3   3   43.70   20.80
  -7  -3   3    5.10   10.50
   7   3  -3   14.90   11.00
  -7   3   3   20.80   12.50
   7   3  -3   14.90   10.70
   7   3  -3   55.49   29.50
   7   3  -3   54.49   29.70
  -6  -3   3  420.56   69.69
  -6  -3   3  392.56   55.39
   6   3  -3  419.06   41.50
  -6   3   3  460.45   45.40
   6   3  -3  358.56   52.99
   6   3  -3  419.46   42.20
  -5  -3   3  817.82   87.09
  -5  -3   3  837.52   75.89
   5   3  -3 1045.10   72.49
   5   3  -3  958.80   78.59
  -5   3   3  883.91   70.19
   5   3  -3 1045.10   73.29
   4  -3  -3  546.65   40.80
  -4  -3   3  496.15   58.39
  -4  -3   3  449.26   47.40
   4  -3  -3  451.45   31.50
   4  -3  -3  454.75   31.80
  -4  -3   3  483.65   58.39
   4   3  -3  566.54   63.09
  -4   3   3  478.85   40.40
   4   3  -3  443.36   41.70
   4   3  -3  443.06   41.10
  -4   3   3  472.75   40.70
   4   3  -3  573.44   62.59
   4   3  -3  440.46   46.20
  -4   3   3  484.35   41.00
  -3  -3   3  148.59   36.40
   3  -3  -3  267.07   22.50
   3  -3  -3  268.57   22.90
  -3  -3   3  164.78   30.10
   3  -3  -3  214.98   22.00
  -3  -3   3  146.29   36.70
  -3   3   3  228.88   22.90
   3   3  -3  192.98   41.60
   3   3  -3  190.98   42.10
  -3   3   3  189.48   28.50
  -3   3   3  191.18   28.10
   3   3  -3  250.77   35.20
  -2  -3   3  260.87   50.69
   2  -3  -3  237.08   26.90
   2  -3  -3  256.17   23.20
   2  -3  -3  235.78   26.40
  -2  -3   3  298.97   33.00
  -2  -3   3  263.87   50.19
  -2   3   3  209.68   25.50
   2   3  -3  275.37   30.80
  -2   3   3  295.57   23.90
   2   3  -3  217.38   44.80
   2   3  -3  219.68   44.30
  -2   3   3  210.68   25.20
   1  -3  -3  272.97   28.90
  -1  -3   3  317.17   51.29
  -1  -3   3  313.87   51.89
   1  -3  -3  271.27   28.20
  -1  -3   3  280.47   29.60
   1  -3  -3  242.68   22.90
   1   3  -3  226.38   46.00
  -1   3   3  254.97   22.40
   1   3  -3  223.78   46.50
  -1   3   3  203.58   25.20
  -1   3   3  203.98   24.80
   1   3  -3  203.78   30.80
   0  -3   3  319.47   52.99
   0  -3   3  408.16   37.20
   0  -3   3  315.87   53.59
   0  -3  -3  345.07   29.20
   0   3  -3  301.87   54.29
   0   3   3  334.77   34.90
   0   3  -3  409.16   37.30
   0   3  -3  297.97   54.79
   0   3   3  334.87   35.50
  -1  -3  -3  299.17   35.40
  -1  -3  -3  296.77   34.50
   1  -3   3  283.77   53.89
   1  -3   3  287.27   53.39
  -1   3  -3  321.87   55.99
  -1   3  -3  299.67   31.80
  -1   3  -3  317.87   56.49
   1   3   3  250.57   36.90
   1   3   3  250.57   36.20
  -2  -3  -3  565.44   50.79
  -2  -3  -3  570.04   51.99
   2  -3   3  306.37   61.59
   2  -3   3  302.47   62.09
   2   3   3  447.16   46.00
  -2   3  -3  397.46   64.69
   2   3   3  446.86   45.20
  -2   3  -3  438.86   43.00
  -2   3  -3  401.86   63.99
  -3  -3  -3 1019.50   81.19
   3  -3   3  800.02   92.09
  -3  -3  -3 1027.60   82.79
   3  -3   3  789.62   92.69
   3   3   3  902.91   78.09
   3   3   3  902.61   77.09
  -3   3  -3 1002.30   98.29
  -3   3  -3  994.50   99.39
   4  -3   3  342.57   66.69
  -4  -3  -3  504.75   53.69
  -4  -3  -3  500.85   52.39
   4  -3   3  347.07   66.09
  -4   3  -3  619.54   86.79
   4   3   3  393.56   46.40
  -4   3  -3  622.44   85.29
   4   3   3  393.36   47.20
   5  -3   3  690.03  100.29
   5  -3   3  681.23  101.19
  -5  -3  -3  881.41   77.89
  -5  -3  -3  887.41   79.59
   5   3   3  666.63   70.29
   5   3   3  665.43   71.29
  -6  -3  -3  396.76   57.89
  -6  -3  -3  399.26   59.49
   6  -3   3  175.68   47.50
   6  -3   3  173.38   47.90
   6   3   3  278.67   49.50
  -6   3  -3  463.35   71.39
  -6   3  -3  464.75   73.19
   6   3   3  279.27   48.60
  -7  -3  -3  207.78   42.80
  -7  -3  -3  206.68   41.60
   7  -3   3  142.99   39.70
   7  -3   3  141.19   40.10
   7   3   3  142.09   39.10
  -7   3  -3  255.77   49.60
   7   3   3  142.69   38.40
  -7   3  -3  257.37   50.99
  -8  -3  -3  114.09   32.90
  -8  -3  -3  114.69   33.80
   8   3   3   47.80   22.70
  -8   3  -3  185.18   42.20
   8   3   3   48.00   22.30
  -8   3  -3  186.68   43.50
  -9  -3  -3   41.90   24.40
  -9  -3  -3   42.10   25.00
  -9   3  -3   36.90   22.20
  -9   3  -3   36.60   21.60
 -10  -3  -3   49.10   30.70
 -10  -3  -3   49.30   31.50
 -10   3  -3   58.99   29.20
  10   3   3   89.39   49.99
 -10   3  -3   58.59   28.30
 -11  -3  -3   31.10   31.10
 -11  -3  -3   31.10   30.30
 -11   3  -3   25.20   22.60
 -11   3  -3   25.40   23.30
 -13  -4   3  -21.60   34.40
  13   4  -3  -35.30   42.80
 -13   4   3   18.60   30.60
  13   4  -3  -33.40   43.90
 -12  -4   3   54.19   35.50
 -12  -4   3    2.40   17.50
 -12  -4   3    2.40   17.10
 -12   4   3   -8.90   20.30
  12   4  -3   -3.60   39.10
  12   4  -3   -2.50   38.90
 -11  -4   3   64.39   29.00
 -11  -4   3   50.69   19.30
 -11  -4   3   50.69   19.80
  11   4  -3   20.00   32.50
 -11   4   3   59.99   30.30
  11   4  -3   21.80   32.60
 -10  -4   3  203.08   34.60
 -10  -4   3  134.69   42.40
 -10  -4   3  203.38   35.40
 -10   4   3  142.89   35.10
  10   4  -3  128.79   48.80
  10   4  -3  126.79   49.00
  -9  -4   3  340.57   62.39
  -9  -4   3  364.26   42.40
  -9  -4   3  363.86   41.60
   9   4  -3  226.88   62.79
   9   4  -3  218.28   63.09
   9   4  -3  370.96   52.19
   9   4  -3  368.76   50.89
  -9   4   3  286.57   49.80
  -8  -4   3  277.27   41.40
  -8  -4   3  277.67   42.20
  -8  -4   3  335.27   58.49
  -8   4   3  283.67   46.10
   8   4  -3  362.06   70.09
   8   4  -3  303.47   44.80
   8   4  -3  304.47   45.80
   8   4  -3  370.86   69.79
  -7  -4   3  590.94   53.69
  -7  -4   3  556.74   61.09
  -7  -4   3  531.45   85.39
  -7  -4   3  591.54   54.59
   7   4  -3  570.54   53.99
   7   4  -3  571.84   54.99
  -7   4   3  476.65   52.39
  -6  -4   3  898.01   82.89
  -6  -4   3  976.30   77.89
  -6  -4   3  975.20   76.89
  -6  -4   3 1012.60  103.89
   6   4  -3  897.91   75.99
   6   4  -3  898.61   76.99
  -6   4   3 1127.89   79.49
   6   4  -3  970.70   97.79
   6   4  -3 1089.19   87.39
   6   4  -3  954.90   98.19
  -5  -4   3  765.52   84.39
  -5  -4   3  776.02   70.59
   5   4  -3  838.22   86.29
  -5   4   3  758.22   61.89
   5   4  -3  825.92   86.79
   5   4  -3  954.90   76.59
   5   4  -3  810.52   66.39
   5   4  -3  810.52   65.59
   4  -4  -3 1902.11  110.69
   4  -4  -3 1894.11  110.29
  -4  -4   3 2019.70  153.58
  -4  -4   3 1964.70  133.39
   4   4  -3 1776.42  146.79
   4   4  -3 1977.00  126.99
  -4   4   3 1897.91  119.49
   4   4  -3 1962.10  133.69
  -4   4   3 1917.71  119.09
   4   4  -3 1753.62  147.59
   4   4  -3 1978.20  128.09
  -4   4   3 1946.51  119.59
   3  -4  -3 2103.59  124.19
   3  -4  -3 2147.79  125.19
  -3  -4   3 2200.78  161.18
   3  -4  -3 2133.29  124.59
  -3  -4   3 2160.68  161.58
  -3  -4   3 2066.19  139.89
   3   4  -3 2137.39  136.69
  -3   4   3 2103.89  125.39
   3   4  -3 1970.50  156.38
  -3   4   3 2039.60  127.59
   3   4  -3 2206.08  141.49
   3   4  -3 1992.70  155.58
  -3   4   3 2031.90  128.09
   3   4  -3 2134.89  135.69
  -2  -4   3  459.75   47.30
   2  -4  -3  513.85   36.50
  -2  -4   3  549.74   76.39
   2  -4  -3  495.95   40.80
  -2  -4   3  542.55   77.09
   2  -4  -3  492.05   40.20
   2   4  -3  467.15   67.29
  -2   4   3  571.54   36.50
  -2   4   3  520.95   41.80
   2   4  -3  462.35   67.99
   2   4  -3  530.35   48.30
  -2   4   3  521.45   42.40
  -1  -4   3 1380.16  112.69
   1  -4  -3 1258.37   85.99
  -1  -4   3 1365.26  113.59
  -1  -4   3 1124.49   87.79
   1  -4  -3 1248.38   84.99
   1   4  -3 1166.88  105.99
   1   4  -3 1225.68   88.89
  -1   4   3 1322.57   86.39
  -1   4   3 1326.47   87.29
   1   4  -3 1153.78  106.69
   0  -4   3 1559.24  134.19
   0  -4  -3 1991.10  117.39
   0  -4   3 1463.95  110.99
   0  -4   3 1575.94  133.29
   0  -4  -3 1977.50  116.09
   0   4  -3 1632.84  135.89
   0   4   3 1794.62  114.49
   0   4  -3 1539.15  112.59
   0   4   3 1801.22  115.59
   0   4  -3 1612.54  136.69
   1  -4   3 1549.34  104.29
  -1  -4  -3 1735.63  110.09
   1  -4   3 1552.94  128.69
   1  -4   3 1570.84  127.79
  -1  -4  -3 1722.13  108.59
  -1   4  -3 1330.27  101.99
   1   4   3 1470.35  105.99
  -1   4  -3 1324.07  123.19
   1   4   3 1464.85  104.89
  -1   4  -3 1306.67  123.89
   2  -4   3  148.39   43.20
  -2  -4  -3  209.28   34.90
  -2  -4  -3  207.58   33.90
   2  -4   3  150.18   42.70
  -2   4  -3  131.39   38.60
   2   4   3  107.89   25.40
  -2   4  -3  131.29   27.30
  -2   4  -3  129.79   39.00
   2   4   3  107.59   24.80
  -3  -4  -3  151.28   32.30
   3  -4   3  172.68   45.50
   3  -4   3  170.58   45.90
  -3  -4  -3  150.18   31.40
  -3   4  -3  148.99   42.00
  -3   4  -3  150.48   41.50
  -3   4  -3  154.68   29.20
   3   4   3  142.19   31.10
   3   4   3  141.79   30.30
  -4  -4  -3   60.39   22.00
   4  -4   3   55.89   35.20
   4  -4   3   55.19   35.60
  -4  -4  -3   59.99   21.30
  -4   4  -3   39.80   24.50
   4   4   3   32.00   16.30
  -4   4  -3   40.10   24.10
   4   4   3   31.90   15.90
  -5  -4  -3  207.78   41.00
   5  -4   3  133.99   46.40
  -5  -4  -3  208.98   42.20
   5  -4   3  135.69   46.00
   5   4   3  139.19   35.90
   5   4   3  138.99   35.10
  -5   4  -3  263.37   56.69
  -5   4  -3  262.37   57.79
   6  -4   3  -21.60   19.30
   6  -4   3  -21.90   19.10
  -6  -4  -3   -2.00   11.30
  -6  -4  -3   -2.00   11.70
  -6   4  -3  -10.00   20.90
   6   4   3   12.10   14.80
  -6   4  -3  -10.00   20.50
   6   4   3   12.10   14.50
  -7  -4  -3   98.29   29.70
   7  -4   3   99.39   36.40
  -7  -4  -3   98.79   30.50
   7  -4   3   98.09   36.80
   7   4   3   86.19   28.60
   7   4   3   86.39   28.00
  -7   4  -3  113.89   37.30
  -7   4  -3  114.29   38.30
   8  -4   3   56.39   45.20
   8  -4   3   57.19   44.80
  -8  -4  -3   -7.00   18.40
  -8  -4  -3   -7.00   17.90
  -8   4  -3   13.60   20.10
  -8   4  -3   14.10   20.70
   8   4   3   17.00   23.10
   8   4   3   17.10   22.70
  -9  -4  -3   37.90   17.90
  -9  -4  -3   38.00   18.40
  -9   4  -3   36.70   27.70
   9   4   3   -1.50   33.40
  -9   4  -3   36.40   26.90
 -10  -4  -3   60.59   31.60
 -10  -4  -3   60.69   32.40
 -10   4  -3   20.90   29.40
 -10   4  -3   20.80   28.50
  10   4   3    4.10   38.10
 -11  -4  -3   21.70   24.60
 -11  -4  -3   -1.50   38.70
 -11  -4  -3   21.70   25.20
  11   4   3   -9.60   40.80
 -11   4  -3   59.09   26.50
 -11   4  -3   58.89   25.70
 -13  -5   3   78.39   44.60
  13   5  -3    3.60   55.59
  13   5  -3    0.50   55.99
 -13   5   3  -86.59   28.00
 -12  -5   3   55.99   36.50
 -12  -5   3   70.79   27.90
 -12  -5   3   70.89   28.60
 -12   5   3   85.59   32.90
  12   5  -3  -24.20   51.19
  12   5  -3  -12.70   50.79
 -11  -5   3   90.59   35.20
 -11  -5   3   37.10   22.00
 -11  -5   3   37.10   21.50
  11   5  -3   -2.20   48.50
  11   5  -3   -0.50   48.30
 -11   5   3   73.79   27.10
 -10  -5   3  131.09   29.80
 -10  -5   3  249.68   54.29
 -10  -5   3  130.89   29.10
  10   5  -3   77.29   50.99
 -10   5   3  203.48   42.90
  10   5  -3   70.69   51.19
  -9  -5   3  133.99   28.00
  -9  -5   3   19.20   23.30
  -9  -5   3  134.09   28.70
  -9   5   3   44.00   18.30
   9   5  -3   38.30   16.40
   9   5  -3   38.10   16.00
  -8  -5   3   59.79   24.70
  -8  -5   3   40.00   15.70
  -8  -5   3   40.10   16.10
   8   5  -3   21.50   22.30
   8   5  -3   66.59   24.10
   8   5  -3   23.20   22.20
  -8   5   3   53.59   20.50
   8   5  -3   66.29   23.50
  -7  -5   3   44.00   20.20
  -7  -5   3    6.60   11.60
  -7  -5   3    4.20    9.00
  -7  -5   3    4.20    9.30
   7   5  -3   -6.50    8.90
  -7   5   3    9.00   12.50
   7   5  -3   10.80   13.40
   7   5  -3   11.90   21.40
   7   5  -3   -6.50    9.20
   7   5  -3   11.40   21.50
  -6  -5   3   89.99   30.20
  -6  -5   3  159.98   29.60
  -6  -5   3  118.29   43.40
  -6  -5   3  160.18   30.30
   6   5  -3  130.59   27.50
   6   5  -3  130.49   26.90
   6   5  -3   91.39   36.50
  -6   5   3  155.28   27.80
   6   5  -3   89.99   36.70
   6   5  -3  150.98   32.30
  -5  -5   3   43.80   24.90
  -5  -5   3   21.20   14.00
  -5   5   3   42.40    7.50
   5   5  -3   63.49   18.80
  -5   5   3   43.00    7.40
   5   5  -3   14.30   20.80
   5   5  -3   43.90   16.90
  -5   5   3   44.30    7.80
   5   5  -3   14.50   20.70
  -5   5   3   51.69   15.00
   5   5  -3   63.49   19.20
  -5   5   3   43.60    7.90
  -4  -5   3  167.18   32.00
   4  -5  -3  184.08   18.10
  -4  -5   3  184.28   47.50
   4  -5  -3  183.88   17.80
   4   5  -3  208.58   33.80
  -4   5   3  225.28   21.70
  -4   5   3  224.58   22.00
   4   5  -3  208.48   33.10
   4   5  -3  237.28   51.29
  -4   5   3  180.18   21.30
  -4   5   3  211.68   29.80
   4   5  -3  217.28   38.70
   4   5  -3  240.38   50.79
   3  -5  -3  333.67   28.80
  -3  -5   3  419.76   70.99
   3  -5  -3  334.97   29.30
  -3  -5   3  300.47   43.00
  -3  -5   3  427.76   70.89
   3   5  -3  378.86   67.69
   3   5  -3  343.17   39.30
   3   5  -3  332.87   37.80
  -3   5   3  334.97   26.40
  -3   5   3  321.07   29.80
   3   5  -3  332.57   37.10
   3   5  -3  374.46   68.39
  -3   5   3  320.07   29.40
  -2  -5   3  415.56   68.09
   2  -5  -3  294.27   33.20
  -2  -5   3  322.77   37.10
  -2  -5   3  421.96   67.59
   2  -5  -3  295.87   33.90
   2  -5  -3  320.57   23.20
  -2   5   3  296.87   30.00
   2   5  -3  356.06   38.70
  -2   5   3  349.27   23.20
  -2   5   3  298.37   30.60
   2   5  -3  256.97   53.09
   2   5  -3  254.27   53.69
  -1  -5   3  166.88   28.20
   1  -5  -3  161.08   25.30
  -1  -5   3  137.09   40.10
   1  -5  -3  160.08   24.60
   1  -5  -3  168.18   16.10
  -1  -5   3  135.39   40.50
  -1   5   3  137.99   24.00
   1   5  -3  140.39   37.10
   1   5  -3  138.89   37.60
  -1   5   3  138.79   24.70
   1   5  -3  142.19   27.30
   0  -5  -3  896.21   66.89
   0  -5  -3  890.71   65.79
   0  -5   3  907.81   90.19
   0  -5   3  825.12   65.39
   0  -5   3  898.11   90.99
   0   5  -3  898.01   88.99
   0   5  -3  724.03   63.99
   0   5  -3  887.81   89.69
   0   5   3  702.83   63.19
   0   5   3  698.33   62.29
  -1  -5  -3  983.40   77.09
   1  -5   3  984.80  100.09
   1  -5   3 1027.70   77.09
  -1  -5  -3  989.50   78.29
   1  -5   3  995.30   99.19
   1   5   3 1036.10   79.39
  -1   5  -3  969.70   77.09
  -1   5  -3  958.70   99.19
  -1   5  -3  946.41   99.89
   1   5   3 1042.40   80.59
  -2  -5  -3 1555.24  112.49
   2  -5   3 1749.03  138.89
  -2  -5  -3 1545.85  110.99
   2  -5   3 1729.73  139.99
   2   5   3 1429.86  109.99
   2   5   3 1437.76  111.39
  -2   5  -3 1530.55  136.49
  -2   5  -3 1510.75  137.29
  -2   5  -3 1477.65  107.89
   3  -5   3  425.96   73.59
  -3  -5  -3  578.24   55.19
  -3  -5  -3  574.94   53.89
   3  -5   3  421.16   74.39
   3   5   3  454.65   50.09
  -3   5  -3  403.36   45.40
  -3   5  -3  323.37   66.99
   3   5   3  456.85   51.19
  -3   5  -3  327.47   66.39
  -4  -5  -3  680.13   67.09
   4  -5   3  667.33   99.39
  -4  -5  -3  676.43   65.79
   4  -5   3  659.43  100.29
   4   5   3  604.94   64.59
  -4   5  -3  653.43   95.49
  -4   5  -3  671.53   64.19
   4   5   3  602.64   63.39
  -4   5  -3  647.74   96.59
   5  -5   3  265.27   61.79
  -5  -5  -3  290.37   49.00
   5  -5   3  268.47   61.19
  -5  -5  -3  291.87   50.19
   5   5   3  266.07   48.80
  -5   5  -3  410.26   75.59
   5   5   3  265.47   47.70
  -5   5  -3  412.66   74.39
  -6  -5  -3  267.67   50.09
   6  -5   3  115.89   42.40
  -6  -5  -3  268.97   51.39
  -6   5  -3  426.96   74.39
   6   5   3  252.37   47.20
   6   5   3  252.77   48.30
  -6   5  -3  427.96   72.89
  -7  -5  -3  149.59   39.60
   7  -5   3   68.89   42.60
   7  -5   3   69.69   42.10
  -7  -5  -3  150.28   40.60
   7   5   3  134.69   39.60
   7   5   3  134.69   38.80
  -8  -5  -3  154.68   38.30
  -8  -5  -3  155.28   39.30
  -8   5  -3  251.67   52.99
   8   5   3   65.19   39.10
   8   5   3   88.79   32.30
  -8   5  -3  250.27   51.49
   8   5   3   88.99   31.70
  -9  -5  -3   42.20   29.20
  -9  -5  -3   42.30   29.90
  -9   5  -3  130.29   36.00
  -9   5  -3  129.19   34.90
   9   5   3  -22.60   33.40
 -10  -5  -3   52.49   33.40
 -10  -5  -3   30.80   30.80
 -10  -5  -3   52.39   32.60
 -10   5  -3   78.89   30.70
  10   5   3   23.90   42.70
 -10   5  -3   79.59   31.60
 -13  -6   3  -18.70   19.90
 -13  -6   3  -36.60   26.00
 -13  -6   3  -18.70   19.50
  13   6  -3   -7.40   64.29
 -13   6   3  -10.80   30.20
  13   6  -3   -9.20   63.89
 -12  -6   3   12.40   17.30
 -12  -6   3   12.40   17.70
 -12  -6   3   23.60   40.00
  12   6  -3  -97.79   50.39
  12   6  -3  -97.19   50.09
 -12   6   3   60.89   23.20
 -11  -6   3   70.39   27.10
 -11  -6   3   70.29   26.40
 -11  -6   3  101.89   45.10
  11   6  -3  -39.30   36.60
 -11   6   3   66.79   27.70
  11   6  -3  -30.40   36.40
 -10  -6   3  168.98   34.30
 -10  -6   3  168.78   33.60
 -10   6   3  123.29   30.70
  -9  -6   3  223.78   49.60
  -9  -6   3  214.48   40.50
  -9  -6   3  214.18   39.60
   9   6  -3  134.59   50.89
   9   6  -3  193.48   39.80
   9   6  -3  141.79   50.69
   9   6  -3  194.48   40.80
  -9   6   3  181.08   37.60
  -8  -6   3  430.96   85.19
  -8  -6   3  457.25   52.49
  -8  -6   3  457.95   53.39
  -8  -6   3  555.94   77.89
   8   6  -3  342.77   74.49
   8   6  -3  590.34   60.59
   8   6  -3  347.57   74.19
  -8   6   3  445.86   50.39
   8   6  -3  588.44   59.29
  -7  -6   3  730.23   74.19
  -7  -6   3  673.83  106.49
  -7  -6   3  776.42   70.49
  -7  -6   3  775.22   69.29
   7   6  -3  742.43  111.29
   7   6  -3  632.34   71.99
  -7   6   3  729.33   64.39
   7   6  -3  703.63   69.09
   7   6  -3  730.03  111.79
   7   6  -3  702.23   67.89
  -6  -6   3  878.81   75.89
  -6  -6   3  811.22   78.89
  -6  -6   3  902.41  105.29
  -6  -6   3  880.61   77.09
   6   6  -3  961.90   79.79
  -6   6   3  757.92   65.69
   6   6  -3  874.61   81.59
   6   6  -3  863.81  104.89
   6   6  -3  961.10   78.59
   6   6  -3  853.21  120.09
  -5  -6   3  760.12  108.09
  -5  -6   3  680.93   67.59
   5   6  -3  624.64   65.29
  -5   6   3  723.63   52.79
   5   6  -3  790.92   66.39
   5   6  -3  695.53   99.69
  -5   6   3  691.93   54.79
  -5   6   3  714.63   48.10
   5   6  -3  791.12   67.39
  -5   6   3  711.23   48.50
  -5   6   3  715.33   52.99
   5   6  -3  685.03  100.39
  -4  -6   3  444.46   51.09
   4  -6  -3  525.05   38.20
   4  -6  -3  525.15   38.60
  -4  -6   3  471.65   82.79
  -4   6   3  503.35   48.70
   4   6  -3  495.25   50.69
  -4   6   3  529.75   39.70
   4   6  -3  577.14   88.49
   4   6  -3  495.55   51.49
  -4   6   3  468.75   38.00
   4   6  -3  569.34   89.19
   4   6  -3  514.35   53.39
  -4   6   3  527.75   39.10
  -3  -6   3  754.92   66.89
  -3  -6   3  790.22   89.29
  -3  -6   3  805.42   89.29
   3   6  -3  746.73   64.49
  -3   6   3  793.72   55.89
   3   6  -3  880.51   90.79
  -3   6   3  688.03   46.90
   3   6  -3  869.71   91.49
  -3   6   3  683.03   67.39
  -3   6   3  798.92   56.69
   3   6  -3  747.33   65.49
   3   6  -3  799.92   68.29
  -2  -6   3 2022.30  171.78
  -2  -6   3 1989.20  172.28
   2  -6  -3 2160.98  121.49
  -2   6   3 2273.47  138.49
   2   6  -3 2019.40  170.08
   2   6  -3 2352.26  147.29
  -2   6   3 2290.87  139.59
   2   6  -3 2295.77  148.39
   2   6  -3 2041.60  168.98
   2   6  -3 2355.16  148.49
   1  -6  -3 1713.63  113.39
  -1  -6   3 1697.03  144.89
  -1  -6   3 1672.93  145.69
   1  -6  -3 1720.93  114.39
   1  -6  -3 1504.55   99.29
  -1  -6   3 1738.83  119.09
   1   6  -3 1837.92  146.29
  -1   6   3 1859.71  115.79
   1   6  -3 1818.72  147.39
   1   6  -3 1642.94  117.39
  -1   6   3 1874.31  117.09
   0  -6   3  258.37   56.49
   0  -6   3  154.08   29.30
   0  -6   3  261.47   55.79
   0  -6  -3  175.48   29.70
   0  -6  -3  176.38   30.50
   0   6  -3  131.39   39.70
   0   6  -3  132.79   39.30
   0   6   3  190.48   32.10
   0   6  -3  218.68   33.90
   0   6   3  188.98   31.20
   1  -6   3 1502.05  129.79
   1  -6   3 1518.35  128.69
   1  -6   3 1380.06   95.99
  -1  -6  -3 1348.27   98.69
  -1  -6  -3 1341.47   97.29
  -1   6  -3 1226.08  120.39
   1   6   3 1268.17   98.09
   1   6   3 1258.77   96.69
  -1   6  -3 1159.58   94.39
  -1   6  -3 1210.98  121.19
  -2  -6  -3 1290.67   97.79
   2  -6   3 1432.46  123.89
   2  -6   3 1417.56  124.99
  -2  -6  -3 1284.27   96.39
  -2   6  -3 1260.37   95.29
   2   6   3 1242.48   98.39
  -2   6  -3 1007.00  113.79
   2   6   3 1233.78   96.79
  -2   6  -3  993.70  114.49
   3  -6   3  336.27   67.39
   3  -6   3  339.87   66.69
  -3  -6  -3  540.85   54.69
  -3  -6  -3  538.55   53.49
   3   6   3  523.85   57.19
  -3   6  -3  340.57   69.39
  -3   6  -3  344.97   68.79
   3   6   3  520.55   55.79
  -3   6  -3  479.65   49.70
  -4  -6  -3   63.59   22.50
   4  -6   3   59.89   35.90
   4  -6   3   59.19   36.30
  -4  -6  -3   63.89   23.20
  -4   6  -3   86.29   32.80
  -4   6  -3   42.00   16.30
   4   6   3   67.39   23.90
   4   6   3   66.99   23.30
  -4   6  -3   85.39   33.20
   5  -6   3  -10.00   21.50
   5  -6   3  -10.10   21.30
  -5  -6  -3   23.80   14.30
  -5  -6  -3   23.90   14.70
  -5   6  -3   38.10   28.60
   5   6   3   10.60   17.10
  -5   6  -3   38.40   28.10
   5   6   3   10.60   17.60
  -5   6  -3   21.20   17.20
   6  -6   3  129.89   42.40
  -6  -6  -3   47.50   22.20
  -6  -6  -3   47.80   22.80
   6  -6   3  128.39   42.90
  -6   6  -3   69.59   38.80
  -6   6  -3   69.29   39.50
   6   6   3   44.20   22.00
   6   6   3   44.30   22.60
   7  -6   3  113.29   44.80
   7  -6   3  111.99   45.30
  -7  -6  -3   36.90   16.70
  -7  -6  -3   36.70   16.30
   7   6   3   46.90   21.90
  -7   6  -3  144.29   43.00
  -7   6  -3  144.19   42.10
   7   6   3   47.00   22.40
   7   6   3   29.70   26.70
  -8  -6  -3   54.89   20.90
  -8  -6  -3   54.69   20.40
  -8   6  -3   43.50   27.00
   8   6   3   12.70   27.60
   8   6   3   12.60   27.00
  -8   6  -3   43.70   27.70
   8   6   3  -68.59   25.50
  -9  -6  -3    5.80   27.60
  -9  -6  -3   35.70   22.60
  -9  -6  -3    5.70   26.90
  -9   6  -3   35.70   30.40
   9   6   3    0.60   38.30
  -9   6  -3   35.40   29.50
 -10  -6  -3   89.19   35.60
 -10  -6  -3   81.19   40.50
 -10  -6  -3   80.99   39.50
  10   6   3    8.50   43.30
 -10   6  -3    6.90   24.20
 -10   6  -3    7.00   25.00
 -12  -7   3   58.69   28.00
 -12  -7   3   58.79   27.40
 -12  -7   3   76.79   47.10
 -12   7   3  127.39   36.90
 -11  -7   3   51.99   40.70
 -11  -7   3   89.59   28.30
 -11  -7   3   89.69   29.00
 -11   7   3  130.49   34.60
  11   7  -3    4.10   47.20
  11   7  -3    0.10   47.50
 -10  -7   3   87.19   32.40
 -10  -7   3   27.30   20.10
 -10  -7   3   27.30   19.60
  10   7  -3  187.28   60.99
  10   7  -3  183.38   61.19
 -10   7   3   95.39   26.90
  -9  -7   3   80.69   28.60
  -9  -7   3   28.90   22.70
  -9  -7   3   80.79   29.20
   9   7  -3   57.79   43.50
   9   7  -3  123.19   34.40
   9   7  -3   58.69   43.30
   9   7  -3  122.69   33.50
  -9   7   3   25.50   17.00
  -8  -7   3   65.29   24.40
  -8  -7   3   52.69   18.60
  -8  -7   3  117.19   50.59
  -8  -7   3   52.69   19.10
   8   7  -3   27.50   30.20
   8   7  -3   65.49   21.30
   8   7  -3   65.69   21.80
  -8   7   3   60.09   20.40
   8   7  -3   30.20   30.40
  -7  -7   3   11.10   13.10
  -7  -7   3   11.10   12.80
  -7  -7   3   -2.50    8.60
  -7  -7   3   39.50   27.30
  -7   7   3   16.80   10.80
   7   7  -3   14.70   13.70
   7   7  -3   46.50   30.20
   7   7  -3    3.30   17.40
   7   7  -3   44.90   30.40
   7   7  -3   14.70   13.30
  -6  -7   3   33.60   23.90
  -6  -7   3   76.19   24.10
  -6  -7   3   61.49   22.80
  -6  -7   3   61.39   22.20
   6   7  -3   34.50   30.00
   6   7  -3   35.50   30.10
   6   7  -3   38.40   15.60
   6   7  -3   70.09   23.10
  -6   7   3   68.79   18.40
   6   7  -3   38.50   15.90
  -5  -7   3   -8.80   11.20
  -5  -7   3    5.30   16.10
   5   7  -3   -2.20    8.40
   5   7  -3   -2.20    8.60
   5   7  -3   17.60   22.00
  -5   7   3   20.40   10.70
  -5   7   3   20.10   10.70
  -5   7   3    5.40    4.70
   5   7  -3   17.80   21.90
   5   7  -3  -12.00    7.90
  -5   7   3   12.10    7.70
  -5   7   3    5.40    4.90
   4  -7  -3   95.29   16.30
  -4  -7   3   89.19   26.50
   4  -7  -3   95.29   16.00
  -4  -7   3   86.79   37.60
   4   7  -3   86.99   34.60
   4   7  -3   50.69   20.50
  -4   7   3   80.79   12.80
  -4   7   3   77.99   15.70
  -4   7   3   78.59   16.20
  -4   7   3   81.19   23.10
   4   7  -3   85.79   34.90
   4   7  -3   45.90   19.00
   4   7  -3   50.59   20.10
  -3  -7   3  154.28   44.30
   3  -7  -3  114.29   20.20
   3  -7  -3  114.49   20.70
  -3  -7   3   78.89   22.70
  -3   7   3   69.19   27.20
   3   7  -3  121.69   27.60
   3   7  -3   87.99   36.00
   3   7  -3   95.29   25.80
   3   7  -3   94.79   25.20
  -3   7   3  136.59   22.00
  -3   7   3  135.39   21.30
   3   7  -3   86.89   36.40
  -2  -7   3  504.45   82.79
  -2  -7   3  514.45   82.59
  -2  -7   3  384.06   45.90
   2   7  -3  437.86   45.40
   2   7  -3  438.36   46.20
   2   7  -3  396.66   73.59
  -2   7   3  398.06   40.40
   2   7  -3  519.05   50.49
   2   7  -3  401.06   72.79
  -2   7   3  394.76   39.60
  -2   7   3  451.25   67.59
   1  -7  -3 1405.06   87.79
  -1  -7   3 1544.75  109.49
   1  -7  -3 1464.95  103.99
  -1  -7   3 1593.24  141.49
  -1  -7   3 1615.84  140.89
   1  -7  -3 1469.05  104.99
  -1   7   3 1347.57  125.59
   1   7  -3 1565.24  110.19
   1   7  -3 1567.04  111.39
  -1   7   3 1615.04  106.89
   1   7  -3 1526.85  137.39
   1   7  -3 1511.15  109.59
  -1   7   3 1627.94  108.29
   1   7  -3 1542.85  136.29
   0  -7   3  411.16   76.99
   0  -7   3  342.87   40.90
   0  -7   3  416.76   76.29
   0  -7  -3  432.86   44.10
   0  -7  -3  431.36   43.20
   0   7  -3  322.57   68.69
   0   7  -3  325.97   67.89
   0   7   3  460.15   46.90
   0   7   3  456.45   45.80
   0   7  -3  343.57   41.90
   1  -7   3  172.68   48.90
   1  -7   3  159.18   30.30
  -1  -7  -3  182.18   33.50
   1  -7   3  174.78   48.40
  -1  -7  -3  181.38   32.70
  -1   7  -3  106.29   41.10
   1   7   3  133.09   30.20
   1   7   3  131.99   29.30
  -1   7  -3  107.59   40.70
  -1   7  -3   95.29   25.00
   2  -7   3  844.92   96.79
  -2  -7  -3  690.63   65.99
   2  -7   3  854.21   95.89
  -2  -7  -3  693.33   67.09
  -2   7  -3  589.64   94.99
  -2   7  -3  597.14   94.19
   2   7   3  766.72   70.49
   2   7   3  760.72   69.09
  -2   7  -3  764.02   67.39
   3  -7   3  441.16   79.39
  -3  -7  -3  409.06   47.50
   3  -7   3  436.66   80.39
  -3  -7  -3  410.56   48.50
   3   7   3  349.17   56.09
  -3   7  -3  341.87   71.39
  -3   7  -3  404.36   55.49
  -3   7  -3  337.57   72.09
   3   7   3  346.77   54.69
   4  -7   3  602.64   99.29
  -4  -7  -3  542.55   61.09
   4  -7   3  608.94   98.19
  -4  -7  -3  544.55   62.29
  -4   7  -3  647.34   64.59
  -4   7  -3  532.35   93.09
  -4   7  -3  526.05   94.09
   4   7   3  650.93   67.69
   4   7   3  646.74   66.09
   5  -7   3  494.95   88.89
   5  -7   3  489.85   89.79
  -5  -7  -3  780.12   72.99
  -5  -7  -3  782.72   74.59
  -5   7  -3  720.33   70.89
  -5   7  -3  589.34   95.49
   5   7   3  580.14   70.39
   5   7   3  576.94   68.79
   5   7   3  509.55   94.99
  -5   7  -3  584.14   96.69
   6  -7   3  495.25   93.19
  -6  -7  -3  564.34   64.99
   6  -7   3  500.75   92.19
  -6  -7  -3  566.34   66.39
  -6   7  -3  568.44   92.19
  -6   7  -3  565.14   93.59
   6   7   3  339.77   62.89
   6   7   3  338.37   61.49
   6   7   3  511.95   90.99
  -6   7  -3  654.13   71.99
  -7  -7  -3  161.48   42.90
  -7  -7  -3  160.98   41.80
   7  -7   3   56.29   40.40
   7  -7   3   56.89   40.00
  -7   7  -3  214.98   51.99
  -7   7  -3  214.58   52.99
   7   7   3  131.79   37.00
   7   7   3  103.79   58.89
   7   7   3  131.39   36.10
  -8  -7  -3  134.99   47.60
  -8  -7  -3  130.49   40.00
  -8  -7  -3  130.79   41.00
   8   7   3  113.09   46.10
  -8   7  -3  140.49   43.30
   8   7   3   50.59   39.30
   8   7   3  112.89   45.00
  -8   7  -3  140.09   42.20
  -9  -7  -3   94.79   36.20
  -9  -7  -3  140.89   41.60
  -9  -7  -3  140.79   40.60
  -9   7  -3  151.88   39.90
  -9   7  -3  150.98   38.80
 -10  -7  -3   78.89   43.00
 -10  -7  -3   78.79   41.90
 -10  -7  -3  107.09   45.60
 -10   7  -3   61.09   33.10
 -10   7  -3   60.59   32.10
  10   7   3   50.59   35.60
 -12  -8   3    2.10   18.60
 -12  -8   3    2.10   19.00
 -12  -8   3    3.10   34.70
  12   8  -3  -75.19   45.90
 -12   8   3   50.69   27.70
  12   8  -3  -75.59   45.60
 -11  -8   3   28.30   21.10
 -11  -8   3   65.99   35.70
 -11  -8   3   28.30   20.60
  11   8  -3  -10.20   51.59
  11   8  -3   -0.70   51.29
 -11   8   3   44.20   25.90
 -10  -8   3   39.60   32.80
 -10  -8   3   59.69   19.20
 -10  -8   3   59.79   19.60
  10   8  -3  -27.70   45.60
  10   8  -3  -37.00   45.50
  10   8  -3   49.60   26.50
 -10   8   3   72.79   21.60
  10   8  -3   49.90   27.30
  -9  -8   3  208.68   41.30
  -9  -8   3  153.68   42.90
  -9  -8   3  208.38   40.40
   9   8  -3  145.79   55.99
  -9   8   3  213.58   37.50
   9   8  -3  177.08   40.90
   9   8  -3  177.98   42.00
   9   8  -3  149.59   55.79
  -8  -8   3  150.18   35.50
  -8  -8   3   89.99   30.80
  -8  -8   3  218.18   64.99
  -8  -8   3  150.38   36.30
   8   8  -3   72.19   55.89
   8   8  -3   70.19   55.59
  -8   8   3  116.49   29.20
   8   8  -3  118.99   36.00
   8   8  -3  119.39   37.00
  -7  -8   3  231.18   46.90
  -7  -8   3  230.78   45.90
  -7  -8   3  255.47   50.09
  -7  -8   3  332.57   73.79
   7   8  -3  228.88   44.90
  -7   8   3  214.48   34.10
   7   8  -3  184.18   56.39
   7   8  -3  265.67   49.20
   7   8  -3  228.28   43.80
   7   8  -3  186.98   56.09
  -6  -8   3  533.25   62.09
  -6  -8   3  416.16   92.29
  -6  -8   3  554.34   61.49
  -6  -8   3  553.74   60.39
   6   8  -3  427.36   89.69
   6   8  -3  424.76   90.19
  -6   8   3  568.14   39.30
  -6   8   3  581.94   49.40
   6   8  -3  596.54   65.49
  -6   8   3  567.94   39.00
   6   8  -3  577.14   63.19
  -6   8   3  593.04   47.30
   6   8  -3  576.44   61.99
  -6   8   3  599.44   47.00
  -5  -8   3  752.82   73.59
  -5  -8   3  923.81  128.19
   5   8  -3  743.53  111.39
  -5   8   3  685.23   51.09
   5   8  -3  714.63   70.29
  -5   8   3  680.23   50.49
  -5   8   3  722.83   65.59
   5   8  -3  727.93   71.09
  -5   8   3  698.33   51.89
   5   8  -3  755.32  110.69
  -5   8   3  731.03   65.39
   5   8  -3  727.63   69.89
  -4  -8   3  638.04   65.99
  -4  -8   3 1023.20  108.99
   4  -8  -3  776.52   55.39
   4  -8  -3  776.92   56.09
   4   8  -3  744.93   68.69
  -4   8   3  693.63   69.09
   4   8  -3  744.73   69.89
  -4   8   3  668.03   52.49
   4   8  -3  727.13   68.89
[truncated: 719,414 more chars]
